# Supplementary material for: Comparative Transcriptomics Reveals Features and Possible Mechanisms of Glucose-Mediated Soil Fungistasis Relief in Arthrobotrys oligospora
Source: Front Microbiol. 2020 Jan 23;10:3143. doi: 10.3389/fmicb.2019.03143 (PMC6989558; doi:10.3389/fmicb.2019.03143)
Supplement: Supplementary file 2 [file Data_Sheet_2.xlsx]

## Sheet: Table S7
Table S7 DEGs list in comparison group AO-G24/AO-Ck
GeneID	Length	AO-Ck-Expression	AO-G24-Expression	log2FoldChange(AO-G24/AO-Ck)	Pvalue	FDR	Up/Down-Regulation(AO-G24/AO-Ck)	Cellular Component	Molecular Function	Biological Process	Kegg Orthology	Nr Description
AOL_s00173g195	753	0.01	1226.16	16.9038	0	0	Up	NA	NA	NA	NA	gi|345562022|gb|EGX45094.1|//hypothetical protein AOL_s00173g195 [Arthrobotrys oligospora ATCC 24927]
AOL_s00079g115	453	0.01	772.9	16.238	0	0	Up	NA	NA	NA	NA	gi|345565947|gb|EGX48894.1|//hypothetical protein AOL_s00079g115 [Arthrobotrys oligospora ATCC 24927]
AOL_s00088g18	765	0.01	641.65	15.9695	0	0	Up	NA	NA	NA	NA	gi|345564335|gb|EGX47303.1|//hypothetical protein AOL_s00088g18 [Arthrobotrys oligospora ATCC 24927]
AOL_s00088g19	1090	0.01	476.66	15.5407	0	0	Up	NA	NA	NA	NA	gi|345564336|gb|EGX47304.1|//hypothetical protein AOL_s00088g19 [Arthrobotrys oligospora ATCC 24927]
AOL_s00043g434	646	0.01	442.2	15.4324	0	0	Up	NA	NA	NA	NA	gi|345569176|gb|EGX52044.1|//hypothetical protein AOL_s00043g434 [Arthrobotrys oligospora ATCC 24927]
AOL_s00075g221	270	0.01	368.67	15.17	1.21553e-101	1.11944e-100	Up	NA	NA	NA	K12562//amphiphysin	gi|345567562|gb|EGX50492.1|//hypothetical protein AOL_s00075g221 [Arthrobotrys oligospora ATCC 24927]
AOL_s00006g571	2322	0.01	320.61	14.9685	0	0	Up	NA	NA	NA	K19069//cellobiose dehydrogenase (acceptor) [EC:1.1.99.18]	gi|345570370|gb|EGX53193.1|//hypothetical protein AOL_s00006g571 [Arthrobotrys oligospora ATCC 24927]
AOL_s00173g128	478	0.01	299.06	14.8681	4.14968e-183	6.55509e-182	Up	NA	NA	NA	K00294//1-pyrroline-5-carboxylate dehydrogenase [EC:1.2.1.88]	gi|345561955|gb|EGX45027.1|//hypothetical protein AOL_s00173g128 [Arthrobotrys oligospora ATCC 24927]
AOL_s00078g418	1507	0.01	294.05	14.8438	0	0	Up	NA	NA	NA	NA	gi|345566442|gb|EGX49385.1|//hypothetical protein AOL_s00078g418 [Arthrobotrys oligospora ATCC 24927]
AOL_s00088g49	681	0.01	272.8	14.7356	3.60856e-257	8.04588e-256	Up	NA	NA	NA	NA	gi|345564366|gb|EGX47334.1|//hypothetical protein AOL_s00088g49 [Arthrobotrys oligospora ATCC 24927]
AOL_s00176g60	863	0.01	263.13	14.6835	0	0	Up	NA	NA	NA	NA	gi|345561814|gb|EGX44889.1|//hypothetical protein AOL_s00176g60 [Arthrobotrys oligospora ATCC 24927]
AOL_s00169g76	3583	0.01	252.99	14.6268	0	0	Up	NA	NA	NA	NA	gi|345562402|gb|EGX45470.1|//hypothetical protein AOL_s00169g76 [Arthrobotrys oligospora ATCC 24927]
AOL_s00080g223	2961	0.01	222.93	14.4443	0	0	Up	NA	GO:0032561//guanyl ribonucleotide binding;GO:0000166//nucleotide binding;GO:0017111//nucleoside-triphosphatase activity	GO:0009207//purine ribonucleoside triphosphate catabolic process	K17065//dynamin 1-like protein [EC:3.6.5.5]	gi|345565645|gb|EGX48594.1|//hypothetical protein AOL_s00080g223 [Arthrobotrys oligospora ATCC 24927]
AOL_s00188g197	1164	0.01	219.55	14.4223	0	0	Up	NA	NA	NA	NA	gi|345561440|gb|EGX44529.1|//hypothetical protein AOL_s00188g197 [Arthrobotrys oligospora ATCC 24927]
AOL_s00088g39	652	0.01	195.33	14.2536	5.447e-222	1.04242e-220	Up	NA	NA	NA	NA	gi|345564356|gb|EGX47324.1|//hypothetical protein AOL_s00088g39 [Arthrobotrys oligospora ATCC 24927]
AOL_s00043g131	605	0.01	187.77	14.1967	0	0	Up	NA	NA	NA	NA	gi|345569476|gb|EGX52342.1|//hypothetical protein AOL_s00043g131 [Arthrobotrys oligospora ATCC 24927]
AOL_s00075g43	2096	0.01	163.58	13.9977	0	0	Up	NA	NA	NA	K06640//serine/threonine-protein kinase ATR [EC:2.7.11.1];K09490//heat shock 70kDa protein 5	gi|345567689|gb|EGX50617.1|//hypothetical protein AOL_s00075g43 [Arthrobotrys oligospora ATCC 24927]
AOL_s00076g128	1062	0.01	151.48	13.8868	4.1251e-237	8.39431e-236	Up	NA	NA	NA	NA	gi|345567432|gb|EGX50364.1|//hypothetical protein AOL_s00076g128 [Arthrobotrys oligospora ATCC 24927]
AOL_s00088g33	3426	0.01	138.83	13.761	0	0	Up	NA	NA	NA	NA	gi|345564350|gb|EGX47318.1|//hypothetical protein AOL_s00088g33 [Arthrobotrys oligospora ATCC 24927]
AOL_s00173g319	477	0.01	137.41	13.7462	2.32054e-84	1.84534e-83	Up	NA	NA	NA	NA	gi|345562146|gb|EGX45218.1|//hypothetical protein AOL_s00173g319 [Arthrobotrys oligospora ATCC 24927]
AOL_s00088g31	276	0.01	126.11	13.6224	1.57198e-36	6.7734e-36	Up	NA	NA	NA	NA	gi|345564348|gb|EGX47316.1|//hypothetical protein AOL_s00088g31 [Arthrobotrys oligospora ATCC 24927]
AOL_s00210g259	359	0.01	123.98	13.5978	2.87444e-52	1.58707e-51	Up	NA	GO:0016671//oxidoreductase activity, acting on a sulfur group of donors, disulfide as acceptor	GO:0008152//metabolic process	K07305//peptide-methionine (R)-S-oxide reductase [EC:1.8.4.12]	gi|345560981|gb|EGX44098.1|//hypothetical protein AOL_s00210g259 [Arthrobotrys oligospora ATCC 24927]
AOL_s00210g106	704	0.01	122.81	13.5841	8.96236e-121	9.51358e-120	Up	NA	NA	NA	NA	gi|345561009|gb|EGX44125.1|//hypothetical protein AOL_s00210g106 [Arthrobotrys oligospora ATCC 24927]
AOL_s00076g122	3165	0.01	121.41	13.5676	0	0	Up	NA	NA	NA	K10580//ubiquitin-conjugating enzyme E2 N [EC:2.3.2.23]	gi|345567426|gb|EGX50358.1|//hypothetical protein AOL_s00076g122 [Arthrobotrys oligospora ATCC 24927]
AOL_s00097g587	358	0.01	120.17	13.5528	1.00342e-50	5.43399e-50	Up	NA	NA	NA	K04487//cysteine desulfurase [EC:2.8.1.7]	gi|345563697|gb|EGX46683.1|//hypothetical protein AOL_s00097g587 [Arthrobotrys oligospora ATCC 24927]
AOL_s00169g77	384	0.01	116.33	13.5059	0	0	Up	NA	NA	NA	NA	gi|345562403|gb|EGX45471.1|//hypothetical protein AOL_s00169g77 [Arthrobotrys oligospora ATCC 24927]
AOL_s00088g50	522	0.01	115.07	13.4902	4.08842e-79	3.10041e-78	Up	NA	NA	NA	NA	gi|345564367|gb|EGX47335.1|//hypothetical protein AOL_s00088g50 [Arthrobotrys oligospora ATCC 24927]
AOL_s00169g79	1966	0.01	109.41	13.4175	0	0	Up	NA	NA	NA	K08254//glucan endo-1,3-alpha-glucosidase [EC:3.2.1.59]	gi|345562405|gb|EGX45473.1|//hypothetical protein AOL_s00169g79 [Arthrobotrys oligospora ATCC 24927]
AOL_s00006g555	3349	0.01	107.28	13.3891	0	0	Up	NA	NA	NA	NA	gi|345570354|gb|EGX53177.1|//hypothetical protein AOL_s00006g555 [Arthrobotrys oligospora ATCC 24927]
AOL_s00193g124	660	0.01	104.92	13.357	5.45504e-89	4.53128e-88	Up	NA	GO:0003824//catalytic activity	GO:0008152//metabolic process	K18337//L-rhamnose 1-dehydrogenase [EC:1.1.1.378 1.1.1.377 1.1.1.173]	gi|345561300|gb|EGX44396.1|//hypothetical protein AOL_s00193g124 [Arthrobotrys oligospora ATCC 24927]
AOL_s00173g318	1780	0.01	103.53	13.3378	2.12574e-283	5.13262e-282	Up	NA	NA	NA	K16261//yeast amino acid transporter	gi|345562145|gb|EGX45217.1|//hypothetical protein AOL_s00173g318 [Arthrobotrys oligospora ATCC 24927]
AOL_s00076g97	521	0.01	101.41	13.3079	5.39856e-64	3.4321e-63	Up	NA	NA	NA	K17989//L-serine/L-threonine ammonia-lyase [EC:4.3.1.17 4.3.1.19]	gi|345567401|gb|EGX50333.1|//hypothetical protein AOL_s00076g97 [Arthrobotrys oligospora ATCC 24927]
AOL_s00080g215	291	0.01	100.48	13.2946	1.3609e-31	5.34046e-31	Up	NA	NA	NA	NA	gi|345565637|gb|EGX48586.1|//hypothetical protein AOL_s00080g215 [Arthrobotrys oligospora ATCC 24927]
AOL_s00088g48	1028	0.01	99.03	13.2736	8.81702e-150	1.14449e-148	Up	NA	NA	NA	NA	gi|345564365|gb|EGX47333.1|//hypothetical protein AOL_s00088g48 [Arthrobotrys oligospora ATCC 24927]
AOL_s00043g630	387	0.01	89.79	13.1323	4.38426e-42	2.07207e-41	Up	NA	NA	NA	NA	gi|345569027|gb|EGX51896.1|//hypothetical protein AOL_s00043g630 [Arthrobotrys oligospora ATCC 24927]
AOL_s00006g411	2144	0.01	84.51	13.0449	1.49453e-256	3.31644e-255	Up	GO:0005739//mitochondrion;GO:0005777//peroxisome	GO:0020037//heme binding;GO:0004096//catalase activity;GO:0004601//peroxidase activity;GO:0005506//iron ion binding	GO:0008152//metabolic process;GO:0006950//response to stress;GO:0042744//hydrogen peroxide catabolic process;GO:0042542//response to hydrogen peroxide	K03781//catalase [EC:1.11.1.6]	gi|345570724|gb|EGX53545.1|//hypothetical protein AOL_s00006g411 [Arthrobotrys oligospora ATCC 24927]
AOL_s00193g170	1413	0.01	75.47	12.8817	2.8532e-239	5.89619e-238	Up	NA	NA	NA	NA	gi|345561161|gb|EGX44258.1|//hypothetical protein AOL_s00193g170 [Arthrobotrys oligospora ATCC 24927]
AOL_s00215g86	1207	0.01	74.03	12.8539	9.81302e-134	1.14608e-132	Up	NA	NA	NA	NA	gi|345560225|gb|EGX43350.1|//hypothetical protein AOL_s00215g86 [Arthrobotrys oligospora ATCC 24927]
AOL_s00169g78	1949	0.01	73.02	12.8341	3.86968e-220	7.3155e-219	Up	NA	NA	NA	NA	gi|345562404|gb|EGX45472.1|//hypothetical protein AOL_s00169g78 [Arthrobotrys oligospora ATCC 24927]
AOL_s00043g165	918	0.01	71.91	12.812	4.3583e-96	3.8248e-95	Up	NA	NA	NA	NA	gi|345569510|gb|EGX52376.1|//hypothetical protein AOL_s00043g165 [Arthrobotrys oligospora ATCC 24927]
AOL_s00215g323	591	0.01	71.14	12.7964	3.32028e-57	1.94623e-56	Up	GO:0016020//membrane;GO:0031224//intrinsic component of membrane	NA	GO:0006810//transport;GO:0006811//ion transport;GO:0030001//metal ion transport	NA	gi|526203612|gb|EPS43878.1|//hypothetical protein H072_2174 [Dactylellina haptotyla CBS 200.50];gi|345560462|gb|EGX43587.1|//hypothetical protein AOL_s00215g323 [Arthrobotrys oligospora ATCC 24927]
AOL_s00054g851	358	0.01	70.16	12.7764	9.66816e-30	3.66886e-29	Up	NA	NA	NA	K01951//GMP synthase (glutamine-hydrolysing) [EC:6.3.5.2];K01930//folylpolyglutamate synthase [EC:6.3.2.17]	gi|345567863|gb|EGX50765.1|//hypothetical protein AOL_s00054g851 [Arthrobotrys oligospora ATCC 24927]
AOL_s00043g382	669	0.01	69.46	12.762	1.30348e-64	8.36672e-64	Up	NA	NA	NA	NA	gi|345569372|gb|EGX52239.1|//hypothetical protein AOL_s00043g382 [Arthrobotrys oligospora ATCC 24927]
AOL_s00006g293	721	0.01	66.19	12.6924	4.43014e-67	2.92829e-66	Up	NA	NA	NA	NA	gi|345570606|gb|EGX53427.1|//hypothetical protein AOL_s00006g293 [Arthrobotrys oligospora ATCC 24927]
AOL_s00110g297	667	0.01	65.62	12.6799	5.47946e-168	7.82061e-167	Up	NA	NA	NA	K00766//anthranilate phosphoribosyltransferase [EC:2.4.2.18]	gi|345563129|gb|EGX46133.1|//hypothetical protein AOL_s00110g297 [Arthrobotrys oligospora ATCC 24927]
AOL_s00173g197	1908	0.01	64.59	12.6571	1.6291e-190	2.6544e-189	Up	NA	NA	NA	K17623//pseudouridine-5'-monophosphatase [EC:3.1.3.-]	gi|345562024|gb|EGX45096.1|//hypothetical protein AOL_s00173g197 [Arthrobotrys oligospora ATCC 24927]
AOL_s00075g122	755	0.01	62.67	12.6136	4.43014e-67	2.93037e-66	Up	NA	GO:0016787//hydrolase activity;GO:0008238//exopeptidase activity	GO:0019538//protein metabolic process	K15428//Cys-Gly metallodipeptidase DUG1 [EC:3.4.13.-]	gi|345567768|gb|EGX50696.1|//hypothetical protein AOL_s00075g122 [Arthrobotrys oligospora ATCC 24927];gi|526204470|gb|EPS44675.1|//hypothetical protein H072_1331 [Dactylellina haptotyla CBS 200.50]
AOL_s00110g98	657	0.01	61.15	12.5781	1.98815e-54	1.12985e-53	Up	NA	NA	NA	K03260//translation initiation factor 4G	gi|345563271|gb|EGX46274.1|//hypothetical protein AOL_s00110g98 [Arthrobotrys oligospora ATCC 24927]
AOL_s00054g204	425	0.01	58.63	12.5174	2.76958e-31	1.08138e-30	Up	NA	NA	NA	NA	gi|345568612|gb|EGX51505.1|//hypothetical protein AOL_s00054g204 [Arthrobotrys oligospora ATCC 24927]
AOL_s00088g14	1704	0.01	55.66	12.4424	9.05612e-146	1.14058e-144	Up	NA	NA	NA	NA	gi|345564331|gb|EGX47299.1|//hypothetical protein AOL_s00088g14 [Arthrobotrys oligospora ATCC 24927]
AOL_s00006g252	1405	0.01	54.4	12.4094	8.96236e-121	9.52442e-120	Up	NA	NA	NA	NA	gi|345570565|gb|EGX53386.1|//hypothetical protein AOL_s00006g252 [Arthrobotrys oligospora ATCC 24927]
AOL_s00088g1	1953	0.01	54	12.3987	2.33094e-163	3.24244e-162	Up	NA	NA	NA	NA	gi|345564318|gb|EGX47286.1|//hypothetical protein AOL_s00088g1 [Arthrobotrys oligospora ATCC 24927]
AOL_s00006g259	345	0.01	53.56	12.3869	1.01996e-21	3.29043e-21	Up	GO:0030529//ribonucleoprotein complex	GO:0005198//structural molecule activity;GO:0003676//nucleic acid binding	GO:0010467//gene expression	K02985//small subunit ribosomal protein S3e	gi|296423595|ref|XP_002841339.1|//40S ribosomal protein S3 [Tuber melanosporum Mel28] ;gi|345570572|gb|EGX53393.1|//hypothetical protein AOL_s00006g259 [Arthrobotrys oligospora ATCC 24927];gi|526194128|gb|EPS36044.1|//hypothetical protein H072_10413 [Dactylellina haptotyla CBS 200.50]
AOL_s00054g767	1788	0.01	52.88	12.3685	9.05612e-146	1.13904e-144	Up	GO:0016021//integral component of membrane	NA	GO:0006810//transport;GO:0055085//transmembrane transport	K02178//checkpoint serine/threonine-protein kinase [EC:2.7.11.1];K01939//adenylosuccinate synthase [EC:6.3.4.4];K11541//carbamoyl-phosphate synthase / aspartate carbamoyltransferase [EC:6.3.5.5 2.1.3.2];K08192//MFS transporter, ACS family, allantoate permease;K13336//peroxin-3;K11369//retrograde regulation protein 2	gi|345568130|gb|EGX51031.1|//hypothetical protein AOL_s00054g767 [Arthrobotrys oligospora ATCC 24927]
AOL_s00006g345	738	0.01	51.97	12.3435	4.0461e-54	2.28821e-53	Up	NA	NA	NA	K10739//replication factor A2	gi|345570658|gb|EGX53479.1|//hypothetical protein AOL_s00006g345 [Arthrobotrys oligospora ATCC 24927]
AOL_s00210g124	289	0.01	49.72	12.2796	7.44254e-16	2.02465e-15	Up	NA	NA	NA	NA	gi|345561027|gb|EGX44143.1|//hypothetical protein AOL_s00210g124 [Arthrobotrys oligospora ATCC 24927]
AOL_s00006g507	1505	0.01	49.49	12.2729	1.12177e-113	1.12418e-112	Up	NA	NA	NA	NA	gi|345570424|gb|EGX53246.1|//hypothetical protein AOL_s00006g507 [Arthrobotrys oligospora ATCC 24927]
AOL_s00080g420	372	0.01	49.37	12.2694	2.4627e-22	8.04781e-22	Up	NA	NA	NA	NA	gi|345565344|gb|EGX48295.1|//hypothetical protein AOL_s00080g420 [Arthrobotrys oligospora ATCC 24927]
AOL_s00083g302	559	0.01	48.41	12.2411	1.57198e-36	6.77654e-36	Up	NA	NA	NA	NA	gi|345564834|gb|EGX47794.1|//hypothetical protein AOL_s00083g302 [Arthrobotrys oligospora ATCC 24927]
AOL_s00112g7	636	0.01	47.84	12.224	4.38426e-42	2.07102e-41	Up	GO:0032156//septin cytoskeleton	GO:0032561//guanyl ribonucleotide binding	GO:0009987//cellular process	K16945//cell division control protein 11	gi|582959895|gb|EWC48093.1|//septin-like spn3 [Drechslerella stenobrocha 248];gi|345562984|gb|EGX45990.1|//hypothetical protein AOL_s00112g7 [Arthrobotrys oligospora ATCC 24927];gi|302420541|ref|XP_003008101.1|//septin [Verticillium alfalfae VaMs.102]
AOL_s00097g114	688	0.01	47.7	12.2198	4.2685e-46	2.16798e-45	Up	NA	GO:0016641//oxidoreductase activity, acting on the CH-NH2 group of donors, oxygen as acceptor	GO:0008152//metabolic process	K00272//D-aspartate oxidase [EC:1.4.3.1];K00273//D-amino-acid oxidase [EC:1.4.3.3]	gi|345564087|gb|EGX47068.1|//hypothetical protein AOL_s00097g114 [Arthrobotrys oligospora ATCC 24927]
AOL_s00173g23	1496	0.01	47.02	12.1991	7.8868e-87	6.4478e-86	Up	NA	NA	NA	NA	gi|345561850|gb|EGX44922.1|//hypothetical protein AOL_s00173g23 [Arthrobotrys oligospora ATCC 24927]
AOL_s00215g318	1253	0.01	47.01	12.1988	3.3006e-111	3.24147e-110	Up	NA	NA	NA	K15110//solute carrier family 25 (mitochondrial 2-oxodicarboxylate transporter), member 21;K02155//V-type H+-transporting ATPase 16kDa proteolipid subunit;K00777	gi|345560457|gb|EGX43582.1|//hypothetical protein AOL_s00215g318 [Arthrobotrys oligospora ATCC 24927]
AOL_s00006g501	2093	0.01	45.52	12.1523	3.07788e-148	3.95122e-147	Up	NA	NA	NA	NA	gi|345570418|gb|EGX53240.1|//hypothetical protein AOL_s00006g501 [Arthrobotrys oligospora ATCC 24927]
AOL_s00080g165	416	0.01	45.18	12.1415	1.43571e-23	4.81671e-23	Up	NA	GO:0016836//hydro-lyase activity;GO:0003824//catalytic activity	GO:0008652//cellular amino acid biosynthetic process;GO:0008152//metabolic process;GO:0009081//branched-chain amino acid metabolic process	K01687//dihydroxy-acid dehydratase [EC:4.2.1.9]	gi|345565587|gb|EGX48536.1|//hypothetical protein AOL_s00080g165 [Arthrobotrys oligospora ATCC 24927];gi|582955322|gb|EWC43571.1|//hypothetical protein DRE_01458 [Drechslerella stenobrocha 248]
AOL_s00007g264	1856	0.01	43.92	12.1007	9.15086e-171	1.33887e-169	Up	NA	NA	NA	K06640//serine/threonine-protein kinase ATR [EC:2.7.11.1]	gi|345570103|gb|EGX52928.1|//hypothetical protein AOL_s00007g264 [Arthrobotrys oligospora ATCC 24927]
AOL_s00188g267	474	0.01	43.49	12.0865	5.7892e-27	2.09291e-26	Up	NA	NA	NA	NA	gi|345561510|gb|EGX44599.1|//hypothetical protein AOL_s00188g267 [Arthrobotrys oligospora ATCC 24927]
AOL_s00210g211	1046	0.01	42.41	12.0502	7.59908e-66	4.95962e-65	Up	NA	NA	NA	NA	gi|345560933|gb|EGX44050.1|//hypothetical protein AOL_s00210g211 [Arthrobotrys oligospora ATCC 24927]
AOL_s00193g185	1849	0.01	42.35	12.0481	4.40388e-121	4.70151e-120	Up	NA	NA	NA	NA	gi|345561176|gb|EGX44273.1|//hypothetical protein AOL_s00193g185 [Arthrobotrys oligospora ATCC 24927]
AOL_s00043g619	422	0.01	42.35	12.0481	6.10744e-19	1.8209e-18	Up	NA	NA	GO:0008152//metabolic process	K13509//lysophosphatidate acyltransferase [EC:2.3.1.51]	gi|345569016|gb|EGX51885.1|//hypothetical protein AOL_s00043g619 [Arthrobotrys oligospora ATCC 24927]
AOL_s00080g333	1868	0.01	41.68	12.0251	1.82393e-120	1.93171e-119	Up	NA	NA	NA	K18716//nucleoporin NUP42;K18715//nucleoporin NUP159;K14306//nuclear pore complex protein Nup62	gi|345565413|gb|EGX48363.1|//hypothetical protein AOL_s00080g333 [Arthrobotrys oligospora ATCC 24927]
AOL_s00081g87	676	0.01	40.72	11.9915	2.27274e-34	9.41001e-34	Up	NA	NA	NA	NA	gi|345565138|gb|EGX48091.1|//hypothetical protein AOL_s00081g87 [Arthrobotrys oligospora ATCC 24927]
AOL_s00075g126	325	0.01	40.22	11.9737	3.08244e-15	8.22455e-15	Up	NA	NA	NA	NA	gi|345567772|gb|EGX50700.1|//hypothetical protein AOL_s00075g126 [Arthrobotrys oligospora ATCC 24927]
AOL_s00004g351	276	0.01	37.8	11.8842	3.16602e-11	7.42883e-11	Up	NA	GO:0032561//guanyl ribonucleotide binding	GO:0006810//transport;GO:0035556//intracellular signal transduction	K07893//Ras-related protein Rab-6A	gi|674217136|dbj|GAK67467.1|//rab6 [Pseudozyma antarctica];gi|345571504|gb|EGX54318.1|//hypothetical protein AOL_s00004g351 [Arthrobotrys oligospora ATCC 24927];gi|719935424|gb|EEH18357.2|//hypothetical protein PABG_00920 [Paracoccidioides brasiliensis Pb03]
AOL_s00091g40	1836	0.01	37.3	11.865	5.81512e-106	5.50782e-105	Up	NA	NA	NA	NA	gi|345564245|gb|EGX47219.1|//hypothetical protein AOL_s00091g40 [Arthrobotrys oligospora ATCC 24927]
AOL_s00006g545	1989	0.01	37.19	11.8607	6.53972e-115	6.65395e-114	Up	NA	NA	NA	NA	gi|345570344|gb|EGX53167.1|//hypothetical protein AOL_s00006g545 [Arthrobotrys oligospora ATCC 24927]
AOL_s00078g57	461	0.01	37.19	11.8607	2.4627e-22	8.04499e-22	Up	NA	NA	NA	NA	gi|345566626|gb|EGX49568.1|//hypothetical protein AOL_s00078g57 [Arthrobotrys oligospora ATCC 24927]
AOL_s00170g77	339	0.01	36.93	11.8506	6.27306e-15	1.65999e-14	Up	NA	NA	NA	K03671//thioredoxin 1	gi|345562301|gb|EGX45370.1|//hypothetical protein AOL_s00170g77 [Arthrobotrys oligospora ATCC 24927]
AOL_s00078g228	480	0.01	36.76	11.8439	2.92182e-23	9.73244e-23	Up	NA	NA	NA	K03469//ribonuclease HI [EC:3.1.26.4]	gi|345566797|gb|EGX49739.1|//hypothetical protein AOL_s00078g228 [Arthrobotrys oligospora ATCC 24927]
AOL_s00169g36	1391	0.01	36.56	11.8361	6.19896e-123	6.74146e-122	Up	NA	NA	NA	NA	gi|345562362|gb|EGX45430.1|//hypothetical protein AOL_s00169g36 [Arthrobotrys oligospora ATCC 24927]
AOL_s00054g336	496	0.01	36.5	11.8337	5.63636e-31	2.18424e-30	Up	GO:0031224//intrinsic component of membrane;GO:0016020//membrane	GO:0004772//sterol O-acyltransferase activity;GO:0016740//transferase activity	NA	K00637//sterol O-acyltransferase [EC:2.3.1.26]	gi|345568372|gb|EGX51266.1|//hypothetical protein AOL_s00054g336 [Arthrobotrys oligospora ATCC 24927]
AOL_s00006g549	684	0.01	35.92	11.8106	1.11677e-34	4.65072e-34	Up	NA	NA	NA	NA	gi|345570348|gb|EGX53171.1|//hypothetical protein AOL_s00006g549 [Arthrobotrys oligospora ATCC 24927]
AOL_s00004g141	2297	0.01	35.17	11.7801	2.4996e-126	2.77998e-125	Up	NA	NA	NA	NA	gi|345571294|gb|EGX54108.1|//hypothetical protein AOL_s00004g141 [Arthrobotrys oligospora ATCC 24927]
AOL_s00097g539	250	0.01	34.84	11.7665	1.10521e-09	2.43224e-09	Up	GO:0043231//intracellular membrane-bounded organelle	GO:0016863//intramolecular oxidoreductase activity, transposing C=C bonds	GO:0008204//ergosterol metabolic process	K09829//C-8 sterol isomerase [EC:5.-.-.-]	gi|345563649|gb|EGX46635.1|//hypothetical protein AOL_s00097g539 [Arthrobotrys oligospora ATCC 24927]
AOL_s00078g168	350	0.01	34.79	11.7645	1.27663e-14	3.34689e-14	Up	GO:0043231//intracellular membrane-bounded organelle;GO:0015629//actin cytoskeleton	GO:0008092//cytoskeletal protein binding	GO:0007010//cytoskeleton organization;GO:0030835//negative regulation of actin filament depolymerization	K10365//capping protein (actin filament) muscle Z-line, beta	gi|345566737|gb|EGX49679.1|//hypothetical protein AOL_s00078g168 [Arthrobotrys oligospora ATCC 24927]
AOL_s00079g418	1218	0.01	34.79	11.7645	1.33883e-60	8.21997e-60	Up	NA	NA	NA	NA	gi|345565831|gb|EGX48779.1|//hypothetical protein AOL_s00079g418 [Arthrobotrys oligospora ATCC 24927]
AOL_s00091g25	840	0.01	34.44	11.7499	1.88456e-62	1.17959e-61	Up	NA	NA	NA	K10380//ankyrin;K19626//inversin;K08803//death-associated protein kinase [EC:2.7.11.1];K16726//ankyrin repeat domain-containing protein 17	gi|345564230|gb|EGX47204.1|//hypothetical protein AOL_s00091g25 [Arthrobotrys oligospora ATCC 24927]
AOL_s00110g99	1706	0.01	33.89	11.7266	2.06344e-75	1.49893e-74	Up	NA	NA	NA	NA	gi|345563272|gb|EGX46275.1|//hypothetical protein AOL_s00110g99 [Arthrobotrys oligospora ATCC 24927]
AOL_s00188g217	1137	0.01	33.55	11.7121	3.32028e-57	1.945e-56	Up	NA	NA	NA	K12609//CCR4-NOT transcriptional complex subunit CAF120	gi|345561460|gb|EGX44549.1|//hypothetical protein AOL_s00188g217 [Arthrobotrys oligospora ATCC 24927]
AOL_s00215g415	2062	0.01	33.12	11.6935	2.8574e-106	2.71468e-105	Up	NA	NA	NA	K12743//N-(5-amino-5-carboxypentanoyl)-L-cysteinyl-D-valine synthase [EC:6.3.2.26];K18281//brevianamide F synthase	gi|345560554|gb|EGX43679.1|//hypothetical protein AOL_s00215g415 [Arthrobotrys oligospora ATCC 24927]
AOL_s00169g44	1242	0.01	31.72	11.6312	2.29652e-59	1.38088e-58	Up	NA	NA	NA	K12386//cystinosin	gi|345562370|gb|EGX45438.1|//hypothetical protein AOL_s00169g44 [Arthrobotrys oligospora ATCC 24927]
AOL_s00054g779	858	0.01	31.66	11.6284	1.28999e-39	5.86473e-39	Up	NA	NA	NA	NA	gi|345568142|gb|EGX51043.1|//hypothetical protein AOL_s00054g779 [Arthrobotrys oligospora ATCC 24927]
AOL_s00076g603	687	0.01	31.49	11.6207	2.33438e-30	8.93855e-30	Up	NA	NA	NA	NA	gi|345567024|gb|EGX49962.1|//hypothetical protein AOL_s00076g603 [Arthrobotrys oligospora ATCC 24927]
AOL_s00054g843	520	0.01	31.19	11.6069	1.01996e-21	3.28701e-21	Up	NA	GO:0016741//transferase activity, transferring one-carbon groups	GO:0006730//one-carbon metabolic process;GO:0006629//lipid metabolic process	K00574//cyclopropane-fatty-acyl-phospholipid synthase [EC:2.1.1.79]	gi|345567855|gb|EGX50757.1|//hypothetical protein AOL_s00054g843 [Arthrobotrys oligospora ATCC 24927]
AOL_s00088g61	300	0.01	30.68	11.5831	1.31125e-10	2.99311e-10	Up	NA	NA	NA	NA	gi|345564316|gb|EGX47285.1|//hypothetical protein AOL_s00088g61 [Arthrobotrys oligospora ATCC 24927]
AOL_s00043g805	265	0.01	30.35	11.5675	9.31544e-09	1.9696e-08	Up	NA	NA	NA	NA	gi|345568916|gb|EGX51786.1|//hypothetical protein AOL_s00043g805 [Arthrobotrys oligospora ATCC 24927]
AOL_s00097g603	378	0.01	29.94	11.5479	5.28736e-14	1.35827e-13	Up	NA	NA	NA	NA	gi|345563600|gb|EGX46587.1|//hypothetical protein AOL_s00097g603 [Arthrobotrys oligospora ATCC 24927]
AOL_s00004g381	2604	0.01	29.77	11.5396	2.34482e-109	2.27643e-108	Up	NA	NA	NA	K09291//nucleoprotein TPR;K11294//nucleolin;K05349//beta-glucosidase [EC:3.2.1.21];K01183//chitinase [EC:3.2.1.14]	gi|345571534|gb|EGX54348.1|//hypothetical protein AOL_s00004g381 [Arthrobotrys oligospora ATCC 24927]
AOL_s00188g53	417	0.01	28.66	11.4848	3.08244e-15	8.23162e-15	Up	NA	NA	NA	NA	gi|345561627|gb|EGX44715.1|//hypothetical protein AOL_s00188g53 [Arthrobotrys oligospora ATCC 24927]
AOL_s00215g65	492	0.01	28.33	11.4681	1.24293e-18	3.67516e-18	Up	NA	GO:0016763//transferase activity, transferring pentosyl groups;GO:0016757//transferase activity, transferring glycosyl groups	GO:0055086//nucleobase-containing small molecule metabolic process	K00772//5'-methylthioadenosine phosphorylase [EC:2.4.2.28];K00033//6-phosphogluconate dehydrogenase [EC:1.1.1.44 1.1.1.343]	gi|345560204|gb|EGX43329.1|//hypothetical protein AOL_s00215g65 [Arthrobotrys oligospora ATCC 24927]
AOL_s00080g236	295	0.01	28.03	11.4528	2.24922e-09	4.88756e-09	Up	GO:0030529//ribonucleoprotein complex	GO:0016787//hydrolase activity;GO:0005198//structural molecule activity	GO:0010467//gene expression	K02894//large subunit ribosomal protein L23e	gi|345565658|gb|EGX48607.1|//hypothetical protein AOL_s00080g236 [Arthrobotrys oligospora ATCC 24927];gi|296419434|ref|XP_002839313.1|//60S ribosomal protein L23 [Tuber melanosporum Mel28]
AOL_s00091g49	1041	0.01	27.9	11.446	2.55594e-43	1.23235e-42	Up	NA	NA	NA	NA	gi|345564254|gb|EGX47228.1|//hypothetical protein AOL_s00091g49 [Arthrobotrys oligospora ATCC 24927]
AOL_s00097g90	819	0.01	27.82	11.4419	3.89848e-33	1.58042e-32	Up	NA	NA	NA	K06667//serine/threonine-protein kinase CAK1 [EC:2.7.11.22]	gi|345564063|gb|EGX47044.1|//hypothetical protein AOL_s00097g90 [Arthrobotrys oligospora ATCC 24927]
AOL_s00004g458	212	0.01	27.77	11.4393	1.13518e-05	2.04127e-05	Up	GO:0044424//intracellular part	GO:0008135//translation factor activity, nucleic acid binding	GO:0006412//translation	K03259//translation initiation factor 4E	gi|345570984|gb|EGX53799.1|//hypothetical protein AOL_s00004g458 [Arthrobotrys oligospora ATCC 24927]
AOL_s00097g219	311	0.01	27.37	11.4184	3.08244e-15	8.23398e-15	Up	GO:0043234//protein complex	GO:0022892//substrate-specific transporter activity	GO:0015031//protein transport	K12397//AP-3 complex subunit beta	gi|582959790|gb|EWC47989.1|//hypothetical protein DRE_02871 [Drechslerella stenobrocha 248];gi|345563998|gb|EGX46980.1|//hypothetical protein AOL_s00097g219 [Arthrobotrys oligospora ATCC 24927]
AOL_s00007g380	386	0.01	27.12	11.4051	4.45654e-13	1.11205e-12	Up	GO:0031224//intrinsic component of membrane	NA	NA	K10245//fatty acid elongase 2 [EC:2.3.1.199];K10246//fatty acid elongase 3 [EC:2.3.1.199]	gi|345570219|gb|EGX53044.1|//hypothetical protein AOL_s00007g380 [Arthrobotrys oligospora ATCC 24927];gi|582959184|gb|EWC47386.1|//putative elongation of fatty acids protein 1 [Drechslerella stenobrocha 248]
AOL_s00188g254	3256	0.01	26.92	11.3945	3.39012e-107	3.24061e-106	Up	NA	NA	NA	K05747//Wiskott-Aldrich syndrome protein	gi|345561497|gb|EGX44586.1|//hypothetical protein AOL_s00188g254 [Arthrobotrys oligospora ATCC 24927]
AOL_s00110g80	691	0.01	26.85	11.3907	1.01996e-21	3.28815e-21	Up	NA	NA	NA	NA	gi|345563253|gb|EGX46256.1|//hypothetical protein AOL_s00110g80 [Arthrobotrys oligospora ATCC 24927]
AOL_s00006g3	310	0.01	26.75	11.3853	1.10521e-09	2.43052e-09	Up	NA	NA	NA	NA	gi|345570907|gb|EGX53724.1|//hypothetical protein AOL_s00006g3 [Arthrobotrys oligospora ATCC 24927]
AOL_s00097g403	627	0.01	26.61	11.3778	1.54649e-65	1.00722e-64	Up	NA	NA	NA	K10352//myosin heavy chain;K10866//DNA repair protein RAD50 [EC:3.6.-.-]	gi|345563789|gb|EGX46773.1|//hypothetical protein AOL_s00097g403 [Arthrobotrys oligospora ATCC 24927]
AOL_s00007g252	546	0.01	26.56	11.375	7.24604e-20	2.21784e-19	Up	NA	NA	NA	NA	gi|345570091|gb|EGX52916.1|//hypothetical protein AOL_s00007g252 [Arthrobotrys oligospora ATCC 24927]
AOL_s00079g436	2148	0.01	26.15	11.3526	1.50344e-202	2.58049e-201	Up	NA	NA	NA	K16261//yeast amino acid transporter;K00777	gi|345565849|gb|EGX48797.1|//hypothetical protein AOL_s00079g436 [Arthrobotrys oligospora ATCC 24927]
AOL_s00173g24	1037	0.01	25.99	11.3437	3.11468e-40	1.42578e-39	Up	NA	NA	NA	NA	gi|345561851|gb|EGX44923.1|//hypothetical protein AOL_s00173g24 [Arthrobotrys oligospora ATCC 24927]
AOL_s00075g188	403	0.01	25.9	11.3387	4.45654e-13	1.11354e-12	Up	NA	NA	NA	NA	gi|345567623|gb|EGX50552.1|//hypothetical protein AOL_s00075g188 [Arthrobotrys oligospora ATCC 24927]
AOL_s00078g112	1029	0.01	25.73	11.3292	2.62526e-39	1.18832e-38	Up	NA	NA	NA	NA	gi|345566681|gb|EGX49623.1|//hypothetical protein AOL_s00078g112 [Arthrobotrys oligospora ATCC 24927]
AOL_s00169g141	1101	0.01	25.65	11.3247	2.15432e-42	1.02388e-41	Up	NA	NA	NA	K01183//chitinase [EC:3.2.1.14]	gi|345562467|gb|EGX45535.1|//hypothetical protein AOL_s00169g141 [Arthrobotrys oligospora ATCC 24927]
AOL_s00210g274	693	0.01	25.41	11.3112	4.11278e-25	1.42548e-24	Up	NA	NA	NA	NA	gi|345560839|gb|EGX43957.1|//hypothetical protein AOL_s00210g273 [Arthrobotrys oligospora ATCC 24927];gi|345560840|gb|EGX43958.1|//hypothetical protein AOL_s00210g274 [Arthrobotrys oligospora ATCC 24927]
AOL_s00054g156	416	0.01	25.28	11.3038	2.18984e-13	5.52349e-13	Up	GO:0030119//AP-type membrane coat adaptor complex	NA	GO:0042559//pteridine-containing compound biosynthetic process;GO:0009108//coenzyme biosynthetic process;GO:0015031//protein transport	K12393//AP-1 complex subunit mu	gi|582959237|gb|EWC47439.1|//AP-1 complex subunit mu-1 [Drechslerella stenobrocha 248];gi|345568564|gb|EGX51457.1|//hypothetical protein AOL_s00054g156 [Arthrobotrys oligospora ATCC 24927];gi|700453380|gb|KGO43296.1|//Clathrin adaptor, mu subunit, C-terminal [Penicillium expansum];gi|526198909|gb|EPS39882.1|//hypothetical protein H072_6322 [Dactylellina haptotyla CBS 200.50]
AOL_s00193g188	408	0.01	24.72	11.2715	9.0695e-13	2.24093e-12	Up	NA	NA	NA	NA	gi|345561179|gb|EGX44276.1|//hypothetical protein AOL_s00193g188 [Arthrobotrys oligospora ATCC 24927]
AOL_s00088g44	1087	0.01	24.68	11.2691	1.26907e-68	8.53372e-68	Up	NA	NA	NA	NA	gi|345564361|gb|EGX47329.1|//hypothetical protein AOL_s00088g44 [Arthrobotrys oligospora ATCC 24927]
AOL_s00006g461	907	0.01	23.47	11.1966	2.76958e-31	1.08228e-30	Up	GO:0043234//protein complex	GO:0019787//small conjugating protein transferase activity;GO:0046914//transition metal ion binding	GO:0032446//protein modification by small protein conjugation	K04532//amyloid beta precursor protein binding protein 1	gi|345570774|gb|EGX53595.1|//hypothetical protein AOL_s00006g461 [Arthrobotrys oligospora ATCC 24927]
AOL_s00078g560	186	0.01	23.36	11.1898	3.56054e-20	1.10137e-19	Up	NA	GO:0046872//metal ion binding;GO:0032559//adenyl ribonucleotide binding;GO:0017111//nucleoside-triphosphatase activity;GO:0005488//binding;GO:0003676//nucleic acid binding	NA	K15710//E3 ubiquitin-protein ligase SHPRH [EC:3.6.4.- 2.3.2.27];K15505//DNA repair protein RAD5 [EC:3.6.4.-];K10877//DNA repair and recombination protein RAD54B [EC:3.6.4.-];K15711//SWI/SNF-related matrix-associated actin-dependent regulator of chromatin subfamily A3 [EC:3.6.4.- 2.3.2.27]	gi|345566232|gb|EGX49176.1|//hypothetical protein AOL_s00078g560 [Arthrobotrys oligospora ATCC 24927]
AOL_s00080g53	919	0.01	22.97	11.1655	5.63636e-31	2.18514e-30	Up	NA	NA	GO:0006412//translation	K01868//threonyl-tRNA synthetase [EC:6.1.1.3]	gi|345565475|gb|EGX48424.1|//hypothetical protein AOL_s00080g53 [Arthrobotrys oligospora ATCC 24927]
AOL_s00088g10	869	0.01	22.78	11.1536	4.0042e-29	1.50724e-28	Up	NA	NA	NA	NA	gi|345564327|gb|EGX47295.1|//hypothetical protein AOL_s00088g10 [Arthrobotrys oligospora ATCC 24927]
AOL_s00079g357	654	0.07	158.16	11.1417	0	0	Up	NA	NA	NA	K01183//chitinase [EC:3.2.1.14]	gi|345565770|gb|EGX48718.1|//hypothetical protein AOL_s00079g357 [Arthrobotrys oligospora ATCC 24927]
AOL_s00088g42	1572	0.01	22.59	11.1415	5.39856e-64	3.43444e-63	Up	NA	NA	NA	NA	gi|345564359|gb|EGX47327.1|//hypothetical protein AOL_s00088g42 [Arthrobotrys oligospora ATCC 24927]
AOL_s00193g142	1017	0.01	22.41	11.1299	4.62526e-34	1.90236e-33	Up	NA	NA	NA	NA	gi|345561318|gb|EGX44414.1|//hypothetical protein AOL_s00193g142 [Arthrobotrys oligospora ATCC 24927]
AOL_s00054g643	1256	0.01	22.37	11.1273	1.05858e-42	5.06467e-42	Up	NA	NA	NA	NA	gi|345568183|gb|EGX51083.1|//hypothetical protein AOL_s00054g643 [Arthrobotrys oligospora ATCC 24927]
AOL_s00079g435	767	0.01	22.33	11.1248	8.36994e-25	2.87216e-24	Up	NA	NA	NA	NA	gi|345565848|gb|EGX48796.1|//hypothetical protein AOL_s00079g435 [Arthrobotrys oligospora ATCC 24927]
AOL_s00078g493	2805	0.01	22.24	11.1189	2.47372e-101	2.26252e-100	Up	NA	NA	NA	K00888//phosphatidylinositol 4-kinase [EC:2.7.1.67]	gi|345566517|gb|EGX49460.1|//hypothetical protein AOL_s00078g493 [Arthrobotrys oligospora ATCC 24927]
AOL_s00054g208	531	0.01	22.09	11.1092	7.44254e-16	2.02347e-15	Up	NA	NA	NA	NA	gi|345568616|gb|EGX51509.1|//hypothetical protein AOL_s00054g208 [Arthrobotrys oligospora ATCC 24927]
AOL_s00188g333	5969	0.01	22.08	11.1085	2.9922e-285	7.3195e-284	Up	NA	NA	NA	NA	gi|345561338|gb|EGX44428.1|//hypothetical protein AOL_s00188g333 [Arthrobotrys oligospora ATCC 24927]
AOL_s00006g511	701	0.01	21.89	11.0961	5.01184e-22	1.62811e-21	Up	NA	GO:0030246//carbohydrate binding	NA	NA	gi|345570428|gb|EGX53250.1|//hypothetical protein AOL_s00006g511 [Arthrobotrys oligospora ATCC 24927]
AOL_s00006g40	276	0.01	21.85	11.0934	6.6179e-07	1.27278e-06	Up	GO:0044464//cell part	GO:0032561//guanyl ribonucleotide binding;GO:0000166//nucleotide binding;GO:0017111//nucleoside-triphosphatase activity	GO:0007165//signal transduction;GO:0035556//intracellular signal transduction;GO:0009207//purine ribonucleoside triphosphate catabolic process	K07827//GTPase KRas	gi|345570894|gb|EGX53712.1|//hypothetical protein AOL_s00006g40 [Arthrobotrys oligospora ATCC 24927];gi|296411839|ref|XP_002835637.1|//hypothetical protein [Tuber melanosporum Mel28]
AOL_s00078g378	619	0.01	21.73	11.0855	6.10744e-19	1.82032e-18	Up	GO:0031224//intrinsic component of membrane	NA	NA	K04709//Acyl-CoA-dependent ceramide synthase [EC:2.3.1.24]	gi|345566402|gb|EGX49345.1|//hypothetical protein AOL_s00078g378 [Arthrobotrys oligospora ATCC 24927]
AOL_s00076g60	1560	0.01	21.47	11.0681	1.19049e-51	6.53052e-51	Up	NA	NA	NA	NA	gi|345567364|gb|EGX50296.1|//hypothetical protein AOL_s00076g60 [Arthrobotrys oligospora ATCC 24927]
AOL_s00173g198	1417	0.01	20.92	11.0307	1.76786e-45	8.90621e-45	Up	NA	NA	NA	K01426//amidase [EC:3.5.1.4]	gi|345562025|gb|EGX45097.1|//hypothetical protein AOL_s00173g198 [Arthrobotrys oligospora ATCC 24927]
AOL_s00173g69	1482	0.01	20.9	11.0293	1.22277e-47	6.35596e-47	Up	NA	NA	NA	NA	gi|345561896|gb|EGX44968.1|//hypothetical protein AOL_s00173g69 [Arthrobotrys oligospora ATCC 24927]
AOL_s00054g246	947	0.01	20.77	11.0203	4.62526e-34	1.9032e-33	Up	NA	NA	NA	K06130//lysophospholipase II [EC:3.1.1.5];K06128//lysophospholipase I [EC:3.1.1.5]	gi|345568654|gb|EGX51547.1|//hypothetical protein AOL_s00054g246 [Arthrobotrys oligospora ATCC 24927]
AOL_s00169g137	2089	0.01	20.62	11.0098	2.17686e-67	1.4471e-66	Up	NA	NA	NA	NA	gi|345562463|gb|EGX45531.1|//hypothetical protein AOL_s00169g137 [Arthrobotrys oligospora ATCC 24927]
AOL_s00140g97	1401	0.01	20.45	10.9979	6.17134e-44	3.02402e-43	Up	NA	NA	NA	K02155//V-type H+-transporting ATPase 16kDa proteolipid subunit;K00777	gi|345562745|gb|EGX45781.1|//hypothetical protein AOL_s00140g97 [Arthrobotrys oligospora ATCC 24927]
AOL_s00078g317	420	0.01	20.39	10.9936	3.16602e-11	7.4307e-11	Up	NA	GO:0003677//DNA binding	GO:0006351//transcription, DNA-templated	NA	gi|582957785|gb|EWC45999.1|//hypothetical protein DRE_04792 [Drechslerella stenobrocha 248];gi|345566341|gb|EGX49284.1|//hypothetical protein AOL_s00078g317 [Arthrobotrys oligospora ATCC 24927]
AOL_s00006g15	471	0.01	20.37	10.9922	3.75626e-12	9.09071e-12	Up	NA	GO:0046914//transition metal ion binding;GO:0016861//intramolecular oxidoreductase activity, interconverting aldoses and ketoses	GO:0044238//primary metabolic process	K01809//mannose-6-phosphate isomerase [EC:5.3.1.8]	gi|345570869|gb|EGX53687.1|//hypothetical protein AOL_s00006g15 [Arthrobotrys oligospora ATCC 24927]
AOL_s00076g14	245	0.01	20.29	10.9866	1.13518e-05	2.04324e-05	Up	NA	NA	NA	NA	gi|345567533|gb|EGX50464.1|//hypothetical protein AOL_s00076g14 [Arthrobotrys oligospora ATCC 24927]
AOL_s00079g479	475	0.01	20.17	10.978	9.0695e-13	2.23915e-12	Up	NA	NA	NA	NA	gi|345565892|gb|EGX48840.1|//hypothetical protein AOL_s00079g479 [Arthrobotrys oligospora ATCC 24927]
AOL_s00079g438	1020	0.01	20.06	10.9701	1.14706e-30	4.42307e-30	Up	NA	NA	NA	NA	gi|345565851|gb|EGX48799.1|//hypothetical protein AOL_s00079g438 [Arthrobotrys oligospora ATCC 24927]
AOL_s00088g20	1701	0.01	20.05	10.9694	6.94034e-53	3.85943e-52	Up	NA	NA	NA	NA	gi|345564337|gb|EGX47305.1|//hypothetical protein AOL_s00088g20 [Arthrobotrys oligospora ATCC 24927]
AOL_s00054g813	252	0.01	20.03	10.9679	2.3102e-05	4.06246e-05	Up	NA	NA	NA	NA	gi|345567825|gb|EGX50727.1|//hypothetical protein AOL_s00054g813 [Arthrobotrys oligospora ATCC 24927]
AOL_s00088g2	3033	0.01	19.73	10.9462	7.47586e-95	6.51168e-94	Up	NA	NA	NA	NA	gi|345564319|gb|EGX47287.1|//hypothetical protein AOL_s00088g2 [Arthrobotrys oligospora ATCC 24927]
AOL_s00215g241	1166	0.01	19.71	10.9447	2.02092e-25	7.04638e-25	Up	NA	NA	NA	NA	gi|345560380|gb|EGX43505.1|//hypothetical protein AOL_s00215g241 [Arthrobotrys oligospora ATCC 24927];gi|526200428|gb|EPS41055.1|//hypothetical protein H072_5052 [Dactylellina haptotyla CBS 200.50]
AOL_s00215g327	495	0.01	19.46	10.9263	4.45654e-13	1.11294e-12	Up	NA	GO:0003824//catalytic activity	NA	K01792//glucose-6-phosphate 1-epimerase [EC:5.1.3.15]	gi|345560466|gb|EGX43591.1|//hypothetical protein AOL_s00215g327 [Arthrobotrys oligospora ATCC 24927]
AOL_s00043g212	1112	0.01	19.36	10.9189	3.46652e-24	1.1774e-23	Up	NA	NA	NA	NA	gi|345569557|gb|EGX52423.1|//hypothetical protein AOL_s00043g212 [Arthrobotrys oligospora ATCC 24927]
AOL_s00006g572	2832	0.01	19.24	10.9099	2.9045e-77	2.15182e-76	Up	NA	NA	NA	K10380//ankyrin;K15110//solute carrier family 25 (mitochondrial 2-oxodicarboxylate transporter), member 21;K02155//V-type H+-transporting ATPase 16kDa proteolipid subunit;K16261//yeast amino acid transporter;K00777	gi|345570371|gb|EGX53194.1|//hypothetical protein AOL_s00006g572 [Arthrobotrys oligospora ATCC 24927]
AOL_s00215g186	630	0.01	19.12	10.9009	4.33886e-17	1.22503e-16	Up	NA	NA	NA	K07573//exosome complex component CSL4	gi|345560325|gb|EGX43450.1|//hypothetical protein AOL_s00215g186 [Arthrobotrys oligospora ATCC 24927]
AOL_s00006g591	5829	0.01	18.92	10.8857	1.78636e-70	1.23051e-69	Up	NA	NA	GO:0055086//nucleobase-containing small molecule metabolic process	K10380//ankyrin;K15110//solute carrier family 25 (mitochondrial 2-oxodicarboxylate transporter), member 21;K02155//V-type H+-transporting ATPase 16kDa proteolipid subunit;K16261//yeast amino acid transporter;K00777	gi|345570390|gb|EGX53213.1|//hypothetical protein AOL_s00006g591 [Arthrobotrys oligospora ATCC 24927]
AOL_s00215g297	1443	0.01	18.86	10.8811	1.53048e-40	7.05793e-40	Up	NA	GO:0003824//catalytic activity	NA	K00226//dihydroorotate dehydrogenase (fumarate) [EC:1.3.98.1]	gi|345560436|gb|EGX43561.1|//hypothetical protein AOL_s00215g297 [Arthrobotrys oligospora ATCC 24927]
AOL_s00169g97	5073	0.01	18.49	10.8525	2.12888e-150	2.77111e-149	Up	NA	NA	NA	K15110//solute carrier family 25 (mitochondrial 2-oxodicarboxylate transporter), member 21;K10380//ankyrin;K01279//tripeptidyl-peptidase I [EC:3.4.14.9];K16261//yeast amino acid transporter;K02155//V-type H+-transporting ATPase 16kDa proteolipid subunit;K00777	gi|345562423|gb|EGX45491.1|//hypothetical protein AOL_s00169g97 [Arthrobotrys oligospora ATCC 24927]
AOL_s00079g114	1653	0.01	18.47	10.851	2.48846e-47	1.28704e-46	Up	NA	NA	NA	K11360//transcriptional activator SPT8	gi|345565946|gb|EGX48893.1|//hypothetical protein AOL_s00079g114 [Arthrobotrys oligospora ATCC 24927]
AOL_s00112g77	1182	0.01	18.45	10.8494	3.89848e-33	1.57973e-32	Up	NA	GO:0003824//catalytic activity	NA	K13704//abhydrolase domain-containing protein 12 [EC:3.1.1.23]	gi|345562880|gb|EGX45888.1|//hypothetical protein AOL_s00112g77 [Arthrobotrys oligospora ATCC 24927]
AOL_s00210g273	799	0.01	18.26	10.8345	2.07572e-21	6.6503e-21	Up	NA	NA	NA	NA	gi|345560839|gb|EGX43957.1|//hypothetical protein AOL_s00210g273 [Arthrobotrys oligospora ATCC 24927]
AOL_s00215g80	650	0.01	18.22	10.8313	8.83004e-17	2.46765e-16	Up	NA	GO:0050136//NADH dehydrogenase (quinone) activity	GO:0006091//generation of precursor metabolites and energy	K03936//NADH dehydrogenase (ubiquinone) Fe-S protein 3 [EC:1.6.5.3 1.6.99.3]	gi|345560219|gb|EGX43344.1|//hypothetical protein AOL_s00215g80 [Arthrobotrys oligospora ATCC 24927]
AOL_s00097g492	345	0.01	17.85	10.8017	1.59789e-07	3.17873e-07	Up	NA	NA	NA	NA	gi|345563759|gb|EGX46744.1|//hypothetical protein AOL_s00097g492 [Arthrobotrys oligospora ATCC 24927]
AOL_s00006g502	958	0.01	17.42	10.7665	5.1708e-97	4.57662e-96	Up	NA	NA	NA	K05462//ephrin-A;K00924;K05103//Eph receptor A2 [EC:2.7.10.1];K08286//protein-serine/threonine kinase [EC:2.7.11.-]	gi|345570419|gb|EGX53241.1|//hypothetical protein AOL_s00006g502 [Arthrobotrys oligospora ATCC 24927]
AOL_s00006g415	513	0.01	17.36	10.7616	2.18984e-13	5.52648e-13	Up	NA	NA	NA	K06948//uncharacterized protein	gi|345570728|gb|EGX53549.1|//hypothetical protein AOL_s00006g415 [Arthrobotrys oligospora ATCC 24927]
AOL_s00007g171	813	0.01	17.26	10.7532	1.74956e-20	5.44983e-20	Up	NA	NA	NA	NA	gi|345570010|gb|EGX52835.1|//hypothetical protein AOL_s00007g171 [Arthrobotrys oligospora ATCC 24927]
AOL_s00097g151	1386	0.01	17	10.7313	3.19914e-36	1.37464e-35	Up	NA	NA	NA	NA	gi|345564124|gb|EGX47105.1|//hypothetical protein AOL_s00097g151 [Arthrobotrys oligospora ATCC 24927]
AOL_s00110g333	1093	0.01	16.84	10.7177	6.86848e-28	2.52422e-27	Up	NA	NA	NA	K01183//chitinase [EC:3.2.1.14];K09247//heme activator protein 1	gi|345563165|gb|EGX46169.1|//hypothetical protein AOL_s00110g333 [Arthrobotrys oligospora ATCC 24927]
AOL_s00215g288	225	0.01	16.65	10.7013	0.000396274	0.000641862	Up	GO:0005634//nucleus;GO:0034399//nuclear periphery;GO:0043232//intracellular non-membrane-bounded organelle	GO:0008092//cytoskeletal protein binding	GO:0009987//cellular process	K05765//cofilin	gi|345560427|gb|EGX43552.1|//hypothetical protein AOL_s00215g288 [Arthrobotrys oligospora ATCC 24927]
AOL_s00097g115	2571	0.01	15.9	10.6348	1.30348e-64	8.36096e-64	Up	NA	NA	NA	NA	gi|345564088|gb|EGX47069.1|//hypothetical protein AOL_s00097g115 [Arthrobotrys oligospora ATCC 24927]
AOL_s00007g161	1289	0.01	15.51	10.599	1.14706e-30	4.41941e-30	Up	NA	NA	NA	K16815//calcium-independent phospholipase A2-gamma;K00600//glycine hydroxymethyltransferase [EC:2.1.2.1]	gi|345570000|gb|EGX52825.1|//hypothetical protein AOL_s00007g161 [Arthrobotrys oligospora ATCC 24927]
AOL_s00097g3	453	0.01	15.36	10.585	4.57738e-09	9.80041e-09	Up	NA	GO:0043167//ion binding	GO:0044238//primary metabolic process	K03635//molybdopterin synthase catalytic subunit [EC:2.8.1.12];K01226//trehalose-6-phosphate hydrolase [EC:3.2.1.93];K01215//glucan 1,6-alpha-glucosidase [EC:3.2.1.70];K01187//alpha-glucosidase [EC:3.2.1.20]	gi|345564184|gb|EGX47164.1|//hypothetical protein AOL_s00097g3 [Arthrobotrys oligospora ATCC 24927]
AOL_s00210g214	3745	0.01	15.35	10.584	9.11008e-92	7.77527e-91	Up	NA	NA	NA	NA	gi|345560936|gb|EGX44053.1|//hypothetical protein AOL_s00210g214 [Arthrobotrys oligospora ATCC 24927]
AOL_s00080g409	1307	0.01	15.27	10.5765	1.14706e-30	4.42124e-30	Up	NA	NA	NA	NA	gi|345565333|gb|EGX48284.1|//hypothetical protein AOL_s00080g409 [Arthrobotrys oligospora ATCC 24927]
AOL_s00075g239	263	0.01	15.27	10.5765	9.56806e-05	0.000161929	Up	GO:0043231//intracellular membrane-bounded organelle;GO:0000785//chromatin	GO:0003676//nucleic acid binding	GO:0034728//nucleosome organization	K11275//histone H1/5	gi|345567580|gb|EGX50510.1|//hypothetical protein AOL_s00075g239 [Arthrobotrys oligospora ATCC 24927]
AOL_s00054g89	320	0.01	15.16	10.5661	4.70152e-05	8.13557e-05	Up	NA	NA	NA	NA	gi|345568798|gb|EGX51690.1|//hypothetical protein AOL_s00054g89 [Arthrobotrys oligospora ATCC 24927]
AOL_s00193g125	770	0.01	15.08	10.5584	4.33886e-17	1.22577e-16	Up	NA	NA	NA	NA	gi|345561301|gb|EGX44397.1|//hypothetical protein AOL_s00193g125 [Arthrobotrys oligospora ATCC 24927]
AOL_s00043g488	2378	0.01	14.88	10.5392	1.15906e-55	6.66816e-55	Up	GO:0031224//intrinsic component of membrane;GO:0005783//endoplasmic reticulum;GO:0044425//membrane part	GO:0008374//O-acyltransferase activity	NA	K11155//diacylglycerol O-acyltransferase 1 [EC:2.3.1.20 2.3.1.75 2.3.1.76]	gi|345569230|gb|EGX52098.1|//hypothetical protein AOL_s00043g488 [Arthrobotrys oligospora ATCC 24927];gi|526196918|gb|EPS38251.1|//hypothetical protein H072_8010 [Dactylellina haptotyla CBS 200.50]
AOL_s00215g320	1575	0.01	14.84	10.5353	3.11468e-40	1.42648e-39	Up	NA	NA	NA	NA	gi|345560459|gb|EGX43584.1|//hypothetical protein AOL_s00215g320 [Arthrobotrys oligospora ATCC 24927]
AOL_s00079g272	990	0.01	14.75	10.5265	1.01996e-21	3.28929e-21	Up	NA	NA	NA	NA	gi|345566104|gb|EGX49051.1|//hypothetical protein AOL_s00079g272 [Arthrobotrys oligospora ATCC 24927]
AOL_s00112g130	1016	0.01	14.62	10.5137	2.4627e-22	8.05064e-22	Up	GO:0043231//intracellular membrane-bounded organelle	GO:0046914//transition metal ion binding;GO:0001071//nucleic acid binding transcription factor activity	GO:0006351//transcription, DNA-templated	NA	gi|345562933|gb|EGX45941.1|//hypothetical protein AOL_s00112g130 [Arthrobotrys oligospora ATCC 24927]
AOL_s00075g44	1819	0.01	14.47	10.4988	3.69534e-41	1.71945e-40	Up	NA	NA	NA	NA	gi|345567690|gb|EGX50618.1|//hypothetical protein AOL_s00075g44 [Arthrobotrys oligospora ATCC 24927]
AOL_s00006g164	532	0.01	14.4	10.4919	1.31125e-10	2.99678e-10	Up	NA	NA	NA	K01522//bis(5'-adenosyl)-triphosphatase [EC:3.6.1.29];K14538//nuclear GTP-binding protein;K03099//son of sevenless	gi|345570477|gb|EGX53298.1|//hypothetical protein AOL_s00006g164 [Arthrobotrys oligospora ATCC 24927]
AOL_s00215g655	3638	0.01	14.36	10.4878	7.80516e-62	4.85608e-61	Up	NA	NA	NA	K00777	gi|345560070|gb|EGX43199.1|//hypothetical protein AOL_s00215g655 [Arthrobotrys oligospora ATCC 24927]
AOL_s00215g659	5124	0.01	14.21	10.4727	3.14726e-65	2.03839e-64	Up	NA	NA	NA	K15110//solute carrier family 25 (mitochondrial 2-oxodicarboxylate transporter), member 21;K05692//actin beta/gamma 1;K02155//V-type H+-transporting ATPase 16kDa proteolipid subunit;K00777;K06666//glucose repression regulatory protein TUP1;K14855//ribosome assembly protein 4	gi|345560074|gb|EGX43203.1|//hypothetical protein AOL_s00215g659 [Arthrobotrys oligospora ATCC 24927]
AOL_s00004g411	310	0.01	14.21	10.4727	2.3102e-05	4.06553e-05	Up	GO:0005856//cytoskeleton;GO:0015629//actin cytoskeleton	GO:0008092//cytoskeletal protein binding	GO:0030036//actin cytoskeleton organization;GO:0007010//cytoskeleton organization	K00167//2-oxoisovalerate dehydrogenase E1 component beta subunit [EC:1.2.4.4];K10364//capping protein (actin filament) muscle Z-line, alpha	gi|345570937|gb|EGX53752.1|//hypothetical protein AOL_s00004g411 [Arthrobotrys oligospora ATCC 24927]
AOL_s00215g660	2218	0.01	14.07	10.4584	3.5028e-49	1.85806e-48	Up	NA	GO:0046914//transition metal ion binding	GO:0006139//nucleobase-containing compound metabolic process	K12828//splicing factor 3B subunit 1;K15110//solute carrier family 25 (mitochondrial 2-oxodicarboxylate transporter), member 21;K16261//yeast amino acid transporter;K02155//V-type H+-transporting ATPase 16kDa proteolipid subunit;K00777	gi|345560075|gb|EGX43204.1|//hypothetical protein AOL_s00215g660 [Arthrobotrys oligospora ATCC 24927]
AOL_s00188g339	666	0.01	13.99	10.4502	8.4575e-50	4.51713e-49	Up	NA	NA	NA	NA	gi|345561344|gb|EGX44434.1|//hypothetical protein AOL_s00188g339 [Arthrobotrys oligospora ATCC 24927]
AOL_s00117g18	697	0.01	13.99	10.4502	2.59808e-14	6.74112e-14	Up	GO:0043231//intracellular membrane-bounded organelle	GO:0032559//adenyl ribonucleotide binding;GO:0003678//DNA helicase activity;GO:0042623//ATPase activity, coupled;GO:0003676//nucleic acid binding	GO:0006281//DNA repair	K10844//DNA excision repair protein ERCC-2 [EC:3.6.4.12]	gi|345562800|gb|EGX45813.1|//hypothetical protein AOL_s00117g18 [Arthrobotrys oligospora ATCC 24927]
AOL_s00080g158	794	0.01	13.98	10.4491	1.797e-16	4.98603e-16	Up	NA	NA	NA	NA	gi|345565580|gb|EGX48529.1|//hypothetical protein AOL_s00080g158 [Arthrobotrys oligospora ATCC 24927]
AOL_s00007g39	1956	0.01	13.91	10.4419	1.05858e-42	5.06208e-42	Up	NA	NA	NA	K05605//3-hydroxyisobutyryl-CoA hydrolase [EC:3.1.2.4]	gi|345570266|gb|EGX53090.1|//hypothetical protein AOL_s00007g39 [Arthrobotrys oligospora ATCC 24927]
AOL_s00076g702	461	0.01	13.73	10.4231	1.89579e-08	3.94832e-08	Up	NA	NA	NA	K10436//microtubule-associated protein, RP/EB family	gi|345566878|gb|EGX49818.1|//hypothetical protein AOL_s00076g702 [Arthrobotrys oligospora ATCC 24927]
AOL_s00078g144	431	0.01	13.72	10.4221	7.85166e-08	1.58771e-07	Up	GO:0048500//signal recognition particle	GO:0005048//signal sequence binding;GO:0003723//RNA binding	GO:0006613//cotranslational protein targeting to membrane;GO:0006448//regulation of translational elongation	K03104//signal recognition particle subunit SRP14	gi|345566713|gb|EGX49655.1|//hypothetical protein AOL_s00078g144 [Arthrobotrys oligospora ATCC 24927]
AOL_s00076g470	2059	0.01	13.47	10.3955	1.25593e-43	6.11241e-43	Up	NA	NA	NA	NA	gi|345567183|gb|EGX50119.1|//hypothetical protein AOL_s00076g470 [Arthrobotrys oligospora ATCC 24927]
AOL_s00083g8	630	0.01	13.43	10.3912	3.75626e-12	9.08128e-12	Up	NA	NA	NA	K17786//mitochondrial organizing structure protein 2	gi|345564895|gb|EGX47853.1|//hypothetical protein AOL_s00083g8 [Arthrobotrys oligospora ATCC 24927]
AOL_s00097g50	587	0.01	13.4	10.388	3.16602e-11	7.43257e-11	Up	NA	NA	NA	NA	gi|345564023|gb|EGX47004.1|//hypothetical protein AOL_s00097g50 [Arthrobotrys oligospora ATCC 24927]
AOL_s00097g442	617	0.01	13.24	10.3707	2.66854e-10	6.01616e-10	Up	NA	GO:0016772//transferase activity, transferring phosphorus-containing groups	NA	K00866//choline kinase [EC:2.7.1.32]	gi|345563709|gb|EGX46694.1|//hypothetical protein AOL_s00097g442 [Arthrobotrys oligospora ATCC 24927]
AOL_s00043g759	826	0.01	12.99	10.3432	7.44254e-16	2.02524e-15	Up	NA	NA	NA	K06009//yapsin 1 [EC:3.4.23.41];K06005//candidapepsin [EC:3.4.23.24]	gi|345568870|gb|EGX51740.1|//hypothetical protein AOL_s00043g759 [Arthrobotrys oligospora ATCC 24927]
AOL_s00006g582	849	0.01	12.97	10.341	1.797e-16	4.9801e-16	Up	NA	NA	NA	NA	gi|345570381|gb|EGX53204.1|//hypothetical protein AOL_s00006g582 [Arthrobotrys oligospora ATCC 24927]
AOL_s00088g46	756	0.01	12.78	10.3197	2.59808e-14	6.74488e-14	Up	NA	GO:0005488//binding	NA	NA	gi|345564363|gb|EGX47331.1|//hypothetical protein AOL_s00088g46 [Arthrobotrys oligospora ATCC 24927]
AOL_s00079g217	813	0.01	12.78	10.3197	5.7892e-27	2.0921e-26	Up	NA	NA	NA	NA	gi|345566049|gb|EGX48996.1|//hypothetical protein AOL_s00079g217 [Arthrobotrys oligospora ATCC 24927]
AOL_s00043g104	873	0.01	12.67	10.3072	1.797e-16	4.98158e-16	Up	NA	NA	NA	K06997//PLP dependent protein	gi|345569449|gb|EGX52315.1|//hypothetical protein AOL_s00043g104 [Arthrobotrys oligospora ATCC 24927]
AOL_s00088g12	2879	0.01	12.54	10.2923	3.32028e-57	1.94745e-56	Up	NA	NA	NA	NA	gi|345564329|gb|EGX47297.1|//hypothetical protein AOL_s00088g12 [Arthrobotrys oligospora ATCC 24927]
AOL_s00043g206	1207	0.01	12.54	10.2923	2.92182e-23	9.73592e-23	Up	NA	NA	NA	K11244//cell wall integrity and stress response component;K01183//chitinase [EC:3.2.1.14]	gi|345569551|gb|EGX52417.1|//hypothetical protein AOL_s00043g206 [Arthrobotrys oligospora ATCC 24927]
AOL_s00007g129	592	0.01	12.47	10.2842	1.31125e-10	2.99384e-10	Up	NA	GO:0016741//transferase activity, transferring one-carbon groups	GO:0006730//one-carbon metabolic process	K12584//m7GpppX diphosphatase [EC:3.6.1.59];K06897//7,8-dihydropterin-6-yl-methyl-4-(beta-D-ribofuranosyl)aminobenzene 5'-phosphate synthase [EC:2.5.1.105]	gi|345569968|gb|EGX52793.1|//hypothetical protein AOL_s00007g129 [Arthrobotrys oligospora ATCC 24927]
AOL_s00078g80	549	0.01	12.28	10.2621	3.85812e-08	7.93593e-08	Up	GO:0044464//cell part	GO:0015932//nucleobase-containing compound transmembrane transporter activity	GO:0006810//transport;GO:0015931//nucleobase-containing compound transport	K03457//nucleobase:cation symporter-1, NCS1 family	gi|582957036|gb|EWC45257.1|//hypothetical protein DRE_05984 [Drechslerella stenobrocha 248];gi|345566649|gb|EGX49591.1|//hypothetical protein AOL_s00078g80 [Arthrobotrys oligospora ATCC 24927]
AOL_s00004g76	1227	0.01	11.98	10.2264	1.21011e-22	3.98665e-22	Up	NA	NA	NA	K15110//solute carrier family 25 (mitochondrial 2-oxodicarboxylate transporter), member 21;K02155//V-type H+-transporting ATPase 16kDa proteolipid subunit;K00777	gi|345571229|gb|EGX54043.1|//hypothetical protein AOL_s00004g76 [Arthrobotrys oligospora ATCC 24927]
AOL_s00043g563	709	0.01	11.95	10.2228	9.0695e-13	2.24033e-12	Up	NA	GO:0046914//transition metal ion binding	NA	K06652//cyclin-dependent kinase inhibitor FAR1	gi|345568960|gb|EGX51829.1|//hypothetical protein AOL_s00043g563 [Arthrobotrys oligospora ATCC 24927]
AOL_s00097g359	627	0.01	11.94	10.2216	1.31125e-10	2.99458e-10	Up	NA	NA	NA	K15920//beta-D-xylosidase 4 [EC:3.2.1.37]	gi|345563950|gb|EGX46933.1|//hypothetical protein AOL_s00097g359 [Arthrobotrys oligospora ATCC 24927]
AOL_s00007g169	1134	0.01	11.92	10.2192	1.14026e-84	9.10646e-84	Up	NA	NA	NA	NA	gi|345570008|gb|EGX52833.1|//hypothetical protein AOL_s00007g169 [Arthrobotrys oligospora ATCC 24927]
AOL_s00078g548	1588	0.01	11.91	10.218	6.68714e-32	2.63862e-31	Up	NA	NA	NA	NA	gi|345566220|gb|EGX49164.1|//hypothetical protein AOL_s00078g548 [Arthrobotrys oligospora ATCC 24927]
AOL_s00193g102	730	0.01	11.9	10.2167	9.0695e-13	2.23974e-12	Up	NA	GO:0016879//ligase activity, forming carbon-nitrogen bonds;GO:0016810//hydrolase activity, acting on carbon-nitrogen (but not peptide) bonds	NA	K01426//amidase [EC:3.5.1.4]	gi|345561278|gb|EGX44374.1|//hypothetical protein AOL_s00193g102 [Arthrobotrys oligospora ATCC 24927]
AOL_s00112g76	1365	0.01	11.87	10.2131	4.11278e-25	1.42601e-24	Up	NA	NA	NA	K00511//squalene monooxygenase [EC:1.14.13.132]	gi|345562879|gb|EGX45887.1|//hypothetical protein AOL_s00112g76 [Arthrobotrys oligospora ATCC 24927]
AOL_s00083g22	395	0.01	11.87	10.2131	2.7409e-06	5.11313e-06	Up	NA	NA	NA	K12177//COP9 signalosome complex subunit 3	gi|345564851|gb|EGX47810.1|//hypothetical protein AOL_s00083g22 [Arthrobotrys oligospora ATCC 24927]
AOL_s00076g575	1578	0.01	11.86	10.2119	2.02092e-25	7.04111e-25	Up	NA	NA	NA	K05034//solute carrier family 6 (neurotransmitter transporter, GABA) member 1;K01183//chitinase [EC:3.2.1.14]	gi|345566996|gb|EGX49934.1|//hypothetical protein AOL_s00076g575 [Arthrobotrys oligospora ATCC 24927]
AOL_s00043g621	852	0.01	11.69	10.1911	6.27306e-15	1.66094e-14	Up	NA	NA	NA	NA	gi|345569018|gb|EGX51887.1|//hypothetical protein AOL_s00043g621 [Arthrobotrys oligospora ATCC 24927]
AOL_s00043g497	2563	0.01	11.62	10.1824	6.86848e-28	2.52323e-27	Up	NA	NA	NA	NA	gi|345569239|gb|EGX52107.1|//hypothetical protein AOL_s00043g497 [Arthrobotrys oligospora ATCC 24927]
AOL_s00081g339	299	0.01	11.61	10.1812	0.00019472	0.000321885	Up	NA	NA	NA	K02947//small subunit ribosomal protein S10e	gi|345565056|gb|EGX48012.1|//hypothetical protein AOL_s00081g339 [Arthrobotrys oligospora ATCC 24927]
AOL_s00210g212	615	0.01	11.42	10.1573	3.25188e-07	6.36713e-07	Up	NA	NA	NA	NA	gi|345560934|gb|EGX44051.1|//hypothetical protein AOL_s00210g212 [Arthrobotrys oligospora ATCC 24927]
AOL_s00080g135	444	0.01	11.41	10.1561	6.6179e-07	1.27304e-06	Up	GO:0044424//intracellular part	GO:0003676//nucleic acid binding	NA	K12876//RNA-binding protein 8A	gi|345565557|gb|EGX48506.1|//hypothetical protein AOL_s00080g135 [Arthrobotrys oligospora ATCC 24927]
AOL_s00054g407	2144	0.01	11.33	10.1459	2.21274e-38	9.87206e-38	Up	NA	NA	NA	NA	gi|345568443|gb|EGX51337.1|//hypothetical protein AOL_s00054g407 [Arthrobotrys oligospora ATCC 24927]
AOL_s00091g24	2254	0.01	11.29	10.1408	9.66816e-30	3.66737e-29	Up	NA	NA	NA	NA	gi|345564229|gb|EGX47203.1|//hypothetical protein AOL_s00091g24 [Arthrobotrys oligospora ATCC 24927]
AOL_s00078g539	3459	0.01	11.26	10.137	1.8158e-41	8.49137e-41	Up	NA	NA	NA	NA	gi|345566563|gb|EGX49506.1|//hypothetical protein AOL_s00078g539 [Arthrobotrys oligospora ATCC 24927]
AOL_s00007g190	3833	0.01	11.23	10.1331	6.2359e-69	4.20844e-68	Up	NA	NA	NA	NA	gi|345570029|gb|EGX52854.1|//hypothetical protein AOL_s00007g190 [Arthrobotrys oligospora ATCC 24927]
AOL_s00173g68	2605	0.01	11.2	10.1293	7.72434e-37	3.34841e-36	Up	NA	NA	NA	NA	gi|345561895|gb|EGX44967.1|//hypothetical protein AOL_s00173g68 [Arthrobotrys oligospora ATCC 24927]
AOL_s00076g381	1164	0.01	11.08	10.1137	7.24604e-20	2.21856e-19	Up	NA	NA	NA	K18696//glycerophosphodiester phosphodiesterase [EC:3.1.4.46];K06694//26S proteasome non-ATPase regulatory subunit 10	gi|345567094|gb|EGX50030.1|//hypothetical protein AOL_s00076g381 [Arthrobotrys oligospora ATCC 24927]
AOL_s00075g173	597	0.01	11.07	10.1124	2.24922e-09	4.88528e-09	Up	GO:0032991//macromolecular complex;GO:0015630//microtubule cytoskeleton	GO:0032561//guanyl ribonucleotide binding;GO:0017111//nucleoside-triphosphatase activity	GO:0009207//purine ribonucleoside triphosphate catabolic process;GO:0043623//cellular protein complex assembly	K10389//tubulin gamma	gi|345567608|gb|EGX50537.1|//hypothetical protein AOL_s00075g173 [Arthrobotrys oligospora ATCC 24927];gi|582958382|gb|EWC46590.1|//tubulin gamma chain [Drechslerella stenobrocha 248]
AOL_s00007g331	489	0.01	11.01	10.1046	1.01996e-21	3.28588e-21	Up	NA	NA	NA	NA	gi|345570170|gb|EGX52995.1|//hypothetical protein AOL_s00007g331 [Arthrobotrys oligospora ATCC 24927]
AOL_s00081g280	1039	0.01	10.98	10.1007	1.74956e-20	5.45348e-20	Up	NA	NA	NA	NA	gi|345564997|gb|EGX47953.1|//hypothetical protein AOL_s00081g280 [Arthrobotrys oligospora ATCC 24927]
AOL_s00110g79	718	0.01	10.96	10.098	1.31125e-10	2.99531e-10	Up	NA	NA	NA	NA	gi|345563252|gb|EGX46255.1|//hypothetical protein AOL_s00110g79 [Arthrobotrys oligospora ATCC 24927]
AOL_s00007g516	445	0.01	10.96	10.098	1.34681e-06	2.55387e-06	Up	GO:0044424//intracellular part	GO:0003933//GTP cyclohydrolase activity	GO:0009396//folic acid-containing compound biosynthetic process	K01495//GTP cyclohydrolase I [EC:3.5.4.16]	gi|345569907|gb|EGX52733.1|//hypothetical protein AOL_s00007g516 [Arthrobotrys oligospora ATCC 24927]
AOL_s00117g13	724	0.01	10.96	10.098	3.16602e-11	7.42135e-11	Up	NA	NA	NA	K17807//mitochondrial translocator assembly and maintenance protein 41	gi|345562795|gb|EGX45808.1|//hypothetical protein AOL_s00117g13 [Arthrobotrys oligospora ATCC 24927]
AOL_s00006g83	548	0.01	10.9	10.0901	9.31544e-09	1.97005e-08	Up	NA	NA	NA	NA	gi|345570805|gb|EGX53625.1|//hypothetical protein AOL_s00006g83 [Arthrobotrys oligospora ATCC 24927]
AOL_s00097g510	1022	0.01	10.89	10.0888	8.83004e-17	2.46913e-16	Up	NA	GO:0003824//catalytic activity	GO:0008152//metabolic process	NA	gi|345563777|gb|EGX46762.1|//hypothetical protein AOL_s00097g510 [Arthrobotrys oligospora ATCC 24927]
AOL_s00006g540	817	0.01	10.83	10.0808	5.28736e-14	1.35865e-13	Up	NA	NA	NA	NA	gi|345570339|gb|EGX53162.1|//hypothetical protein AOL_s00006g540 [Arthrobotrys oligospora ATCC 24927]
AOL_s00210g290	1485	0.01	10.79	10.0755	2.02092e-25	7.04375e-25	Up	NA	NA	NA	K01279//tripeptidyl-peptidase I [EC:3.4.14.9];K16261//yeast amino acid transporter;K01077//alkaline phosphatase [EC:3.1.3.1];K00777	gi|345560724|gb|EGX43843.1|//hypothetical protein AOL_s00210g290 [Arthrobotrys oligospora ATCC 24927]
AOL_s00079g205	373	0.01	10.75	10.0701	2.3102e-05	4.06861e-05	Up	NA	NA	NA	NA	gi|345566037|gb|EGX48984.1|//hypothetical protein AOL_s00079g205 [Arthrobotrys oligospora ATCC 24927]
AOL_s00007g379	540	0.01	10.68	10.0607	3.85812e-08	7.92543e-08	Up	NA	NA	NA	K00799//glutathione S-transferase [EC:2.5.1.18]	gi|345570218|gb|EGX53043.1|//hypothetical protein AOL_s00007g379 [Arthrobotrys oligospora ATCC 24927]
AOL_s00088g34	2483	0.01	10.51	10.0375	1.8158e-41	8.49563e-41	Up	NA	NA	NA	NA	gi|345564351|gb|EGX47319.1|//hypothetical protein AOL_s00088g34 [Arthrobotrys oligospora ATCC 24927]
AOL_s00078g503	1104	0.01	10.41	10.0238	1.04762e-17	3.02005e-17	Up	NA	NA	NA	NA	gi|345566527|gb|EGX49470.1|//hypothetical protein AOL_s00078g503 [Arthrobotrys oligospora ATCC 24927]
AOL_s00004g142	442	0.01	10.4	10.0224	7.85166e-08	1.58805e-07	Up	NA	NA	NA	NA	gi|345571295|gb|EGX54109.1|//hypothetical protein AOL_s00004g142 [Arthrobotrys oligospora ATCC 24927]
AOL_s00188g302	1496	0.01	10.3	10.0084	1.96757e-29	7.42719e-29	Up	NA	NA	NA	NA	gi|345561545|gb|EGX44634.1|//hypothetical protein AOL_s00188g302 [Arthrobotrys oligospora ATCC 24927]
AOL_s00081g205	377	0.01	10.17	9.9901	4.70152e-05	8.13104e-05	Up	NA	NA	NA	NA	gi|345564922|gb|EGX47878.1|//hypothetical protein AOL_s00081g205 [Arthrobotrys oligospora ATCC 24927]
AOL_s00188g332	4131	0.01	10.1	9.98014	7.20312e-74	5.1443e-73	Up	NA	NA	NA	NA	gi|345561337|gb|EGX44427.1|//hypothetical protein AOL_s00188g332 [Arthrobotrys oligospora ATCC 24927]
AOL_s00215g157	1386	0.01	10.1	9.98014	1.01996e-21	3.28474e-21	Up	NA	GO:0004175//endopeptidase activity;GO:0046914//transition metal ion binding	GO:0019538//protein metabolic process	K01412//mitochondrial-processing peptidase subunit alpha [EC:3.4.24.64]	gi|345560296|gb|EGX43421.1|//hypothetical protein AOL_s00215g157 [Arthrobotrys oligospora ATCC 24927]
AOL_s00054g549	2704	0.01	10.09	9.97871	2.55594e-43	1.23171e-42	Up	NA	NA	NA	K11360//transcriptional activator SPT8	gi|345568276|gb|EGX51173.1|//hypothetical protein AOL_s00054g549 [Arthrobotrys oligospora ATCC 24927]
AOL_s00007g499	854	0.01	10.08	9.97728	9.0695e-13	2.23855e-12	Up	NA	NA	NA	K00480//salicylate hydroxylase [EC:1.14.13.1];K05546//alpha 1,3-glucosidase [EC:3.2.1.84]	gi|345569890|gb|EGX52716.1|//hypothetical protein AOL_s00007g499 [Arthrobotrys oligospora ATCC 24927]
AOL_s00004g622	603	0.01	10.06	9.97441	9.31544e-09	1.97049e-08	Up	NA	NA	NA	K11696//centromere-localized protein 2	gi|345571148|gb|EGX53963.1|//hypothetical protein AOL_s00004g622 [Arthrobotrys oligospora ATCC 24927]
AOL_s00188g340	906	0.01	9.92	9.9542	1.07603e-13	2.74005e-13	Up	NA	NA	NA	NA	gi|345561345|gb|EGX44435.1|//hypothetical protein AOL_s00188g340 [Arthrobotrys oligospora ATCC 24927]
AOL_s00054g991	1135	0.01	9.92	9.9542	3.46652e-24	1.17698e-23	Up	NA	NA	NA	NA	gi|345568003|gb|EGX50905.1|//hypothetical protein AOL_s00054g991 [Arthrobotrys oligospora ATCC 24927]
AOL_s00173g14	1827	0.04	39.35	9.94215	1.23291e-192	2.02659e-191	Up	NA	NA	NA	K05692//actin beta/gamma 1;K00777;K14855//ribosome assembly protein 4	gi|345561841|gb|EGX44913.1|//hypothetical protein AOL_s00173g14 [Arthrobotrys oligospora ATCC 24927]
AOL_s00080g148	2893	0.01	9.78	9.93369	3.59778e-45	1.79889e-44	Up	NA	NA	NA	K11361//transcription factor SPT20;K15561//nuclear polyadenylated RNA-binding protein 3;K09423//Myb-like DNA-binding protein BAS1	gi|345565570|gb|EGX48519.1|//hypothetical protein AOL_s00080g148 [Arthrobotrys oligospora ATCC 24927]
AOL_s00097g203	517	0.01	9.78	9.93369	2.24922e-09	4.88414e-09	Up	NA	NA	NA	NA	gi|345564176|gb|EGX47157.1|//hypothetical protein AOL_s00097g203 [Arthrobotrys oligospora ATCC 24927]
AOL_s00173g48	941	0.01	9.75	9.92926	1.51463e-15	4.08579e-15	Up	NA	NA	NA	K02995//small subunit ribosomal protein S8e;K11294//nucleolin	gi|345561875|gb|EGX44947.1|//hypothetical protein AOL_s00173g48 [Arthrobotrys oligospora ATCC 24927]
AOL_s00210g266	1110	0.01	9.04	9.82018	1.51463e-15	4.08815e-15	Up	NA	NA	NA	K15110//solute carrier family 25 (mitochondrial 2-oxodicarboxylate transporter), member 21;K02155//V-type H+-transporting ATPase 16kDa proteolipid subunit;K00777	gi|345560832|gb|EGX43950.1|//hypothetical protein AOL_s00210g266 [Arthrobotrys oligospora ATCC 24927]
AOL_s00043g164	1396	0.04	36.1	9.81778	1.00609e-276	2.35007e-275	Up	NA	NA	NA	K10380//ankyrin	gi|345569509|gb|EGX52375.1|//hypothetical protein AOL_s00043g164 [Arthrobotrys oligospora ATCC 24927]
AOL_s00043g513	681	0.01	8.86	9.79116	4.57738e-09	9.79366e-09	Up	NA	NA	NA	NA	gi|345569255|gb|EGX52123.1|//hypothetical protein AOL_s00043g513 [Arthrobotrys oligospora ATCC 24927]
AOL_s00004g78	794	0.01	8.77	9.77643	7.05474e-24	2.38139e-23	Up	NA	NA	NA	NA	gi|345571231|gb|EGX54045.1|//hypothetical protein AOL_s00004g78 [Arthrobotrys oligospora ATCC 24927]
AOL_s00079g287	3062	0.01	8.76	9.77479	2.92182e-23	9.72896e-23	Up	NA	NA	NA	K11756//chromatin structure-remodeling complex subunit RSC1/2;K05747//Wiskott-Aldrich syndrome protein	gi|345566119|gb|EGX49066.1|//hypothetical protein AOL_s00079g287 [Arthrobotrys oligospora ATCC 24927];gi|345566120|gb|EGX49067.1|//hypothetical protein AOL_s00079g288 [Arthrobotrys oligospora ATCC 24927]
AOL_s00097g489	451	0.01	8.66	9.75822	2.3102e-05	4.06323e-05	Up	NA	NA	NA	NA	gi|345563756|gb|EGX46741.1|//hypothetical protein AOL_s00097g489 [Arthrobotrys oligospora ATCC 24927]
AOL_s00170g83	628	0.01	8.65	9.75656	7.85166e-08	1.58909e-07	Up	NA	NA	NA	NA	gi|345562307|gb|EGX45376.1|//hypothetical protein AOL_s00170g83 [Arthrobotrys oligospora ATCC 24927]
AOL_s00078g540	1045	0.01	8.49	9.72962	4.38426e-42	2.06997e-41	Up	NA	NA	NA	NA	gi|345566564|gb|EGX49507.1|//hypothetical protein AOL_s00078g540 [Arthrobotrys oligospora ATCC 24927]
AOL_s00007g269	924	0.01	8.45	9.72281	7.64436e-12	1.82727e-11	Up	NA	NA	NA	K01443//N-acetylglucosamine-6-phosphate deacetylase [EC:3.5.1.25]	gi|345570108|gb|EGX52933.1|//hypothetical protein AOL_s00007g269 [Arthrobotrys oligospora ATCC 24927]
AOL_s00006g211	396	0.01	8.42	9.71768	9.56806e-05	0.000161958	Up	NA	NA	NA	NA	gi|345570524|gb|EGX53345.1|//hypothetical protein AOL_s00006g211 [Arthrobotrys oligospora ATCC 24927]
AOL_s00076g246	2356	0.01	8.33	9.70217	2.76958e-31	1.08183e-30	Up	NA	NA	NA	K00921//1-phosphatidylinositol-3-phosphate 5-kinase [EC:2.7.1.150]	gi|345567237|gb|EGX50171.1|//hypothetical protein AOL_s00076g246 [Arthrobotrys oligospora ATCC 24927]
AOL_s00097g300	1404	0.01	8.31	9.6987	2.52948e-18	7.40181e-18	Up	NA	NA	NA	K09265//MADS-box transcription factor, other eukaryote	gi|345563891|gb|EGX46874.1|//hypothetical protein AOL_s00097g300 [Arthrobotrys oligospora ATCC 24927]
AOL_s00076g64	1040	0.01	8.3	9.69697	2.18984e-13	5.52051e-13	Up	NA	NA	NA	K01179//endoglucanase [EC:3.2.1.4];K18578//xyloglucan-specific exo-beta-1,4-glucanase [EC:3.2.1.155];K19355//mannan endo-1,4-beta-mannosidase [EC:3.2.1.78];K01181//endo-1,4-beta-xylanase [EC:3.2.1.8]	gi|345567368|gb|EGX50300.1|//hypothetical protein AOL_s00076g64 [Arthrobotrys oligospora ATCC 24927]
AOL_s00006g536	1397	0.01	8.28	9.69349	1.47464e-19	4.46659e-19	Up	NA	NA	NA	NA	gi|345570335|gb|EGX53158.1|//hypothetical protein AOL_s00006g536 [Arthrobotrys oligospora ATCC 24927]
AOL_s00076g375	2037	0.01	8.17	9.67419	7.12854e-49	3.76206e-48	Up	NA	NA	NA	K05692//actin beta/gamma 1;K00777;K06666//glucose repression regulatory protein TUP1;K14855//ribosome assembly protein 4	gi|345567088|gb|EGX50024.1|//hypothetical protein AOL_s00076g375 [Arthrobotrys oligospora ATCC 24927]
AOL_s00080g192	2858	0.01	8.14	9.66888	2.69644e-35	1.1392e-34	Up	NA	NA	NA	K09240//transcriptional regulatory protein CAT8;K09241//transcriptional regulatory protein GAL4	gi|345565614|gb|EGX48563.1|//hypothetical protein AOL_s00080g192 [Arthrobotrys oligospora ATCC 24927];gi|345565364|gb|EGX48315.1|//hypothetical protein AOL_s00080g440 [Arthrobotrys oligospora ATCC 24927]
AOL_s00054g726	988	0.28	227.7	9.66749	0	0	Up	NA	NA	GO:0006810//transport	K08158//MFS transporter, DHA1 family, multidrug resistance protein;K08157//MFS transporter, DHA1 family, multidrug resistance protein;K12604//CCR4-NOT transcription complex subunit 1	gi|345568089|gb|EGX50990.1|//hypothetical protein AOL_s00054g726 [Arthrobotrys oligospora ATCC 24927]
AOL_s00075g80	1864	0.01	8.09	9.66	1.61461e-32	6.45568e-32	Up	NA	NA	NA	K15110//solute carrier family 25 (mitochondrial 2-oxodicarboxylate transporter), member 21;K01279//tripeptidyl-peptidase I [EC:3.4.14.9];K02155//V-type H+-transporting ATPase 16kDa proteolipid subunit;K08803//death-associated protein kinase [EC:2.7.11.1];K16261//yeast amino acid transporter;K00777	gi|345567726|gb|EGX50654.1|//hypothetical protein AOL_s00075g80 [Arthrobotrys oligospora ATCC 24927]
AOL_s00076g162	1333	0.01	8.08	9.65821	3.2859e-32	1.30373e-31	Up	NA	NA	NA	K16815//calcium-independent phospholipase A2-gamma	gi|345567466|gb|EGX50398.1|//hypothetical protein AOL_s00076g162 [Arthrobotrys oligospora ATCC 24927]
AOL_s00054g903	1257	0.01	8.05	9.65284	7.44254e-16	2.02406e-15	Up	NA	GO:0016301//kinase activity;GO:0005488//binding	GO:0044267//cellular protein metabolic process	NA	gi|345567915|gb|EGX50817.1|//hypothetical protein AOL_s00054g903 [Arthrobotrys oligospora ATCC 24927]
AOL_s00169g180	703	0.01	8.03	9.64926	7.72434e-37	3.34685e-36	Up	NA	NA	NA	K16261//yeast amino acid transporter	gi|345562506|gb|EGX45574.1|//hypothetical protein AOL_s00169g180 [Arthrobotrys oligospora ATCC 24927]
AOL_s00110g152	1213	0.01	8.02	9.64746	3.08244e-15	8.2269e-15	Up	NA	NA	NA	NA	gi|345563325|gb|EGX46328.1|//hypothetical protein AOL_s00110g152 [Arthrobotrys oligospora ATCC 24927]
AOL_s00054g423	652	0.01	8.01	9.64566	7.85166e-08	1.5884e-07	Up	NA	NA	NA	K03137//transcription initiation factor TFIIE subunit beta	gi|345568459|gb|EGX51353.1|//hypothetical protein AOL_s00054g423 [Arthrobotrys oligospora ATCC 24927]
AOL_s00076g179	1611	0.01	7.92	9.62936	3.56054e-20	1.101e-19	Up	NA	NA	NA	NA	gi|345567483|gb|EGX50415.1|//hypothetical protein AOL_s00076g179 [Arthrobotrys oligospora ATCC 24927]
AOL_s00078g435	1145	0.01	7.85	9.61655	4.22432e-21	1.34463e-20	Up	NA	NA	NA	NA	gi|345566459|gb|EGX49402.1|//hypothetical protein AOL_s00078g435 [Arthrobotrys oligospora ATCC 24927]
AOL_s00117g53	635	0.01	7.84	9.61471	1.59789e-07	3.17738e-07	Up	NA	NA	NA	K15441//tRNA-specific adenosine deaminase 2 [EC:3.5.4.-];K18884//4-dimethylallyltryptophan N-methyltransferase [EC:2.1.1.261]	gi|345562835|gb|EGX45848.1|//hypothetical protein AOL_s00117g53 [Arthrobotrys oligospora ATCC 24927]
AOL_s00004g158	2325	0.06	46.73	9.60517	2.16598e-131	2.50148e-130	Up	NA	NA	NA	K09468//zinc finger protein MSN2/4;K09467//zinc-finger protein CreA/MIG	gi|345571311|gb|EGX54125.1|//hypothetical protein AOL_s00004g158 [Arthrobotrys oligospora ATCC 24927]
AOL_s00140g73	1235	0.01	7.72	9.59246	3.79556e-37	1.65612e-36	Up	NA	NA	NA	K15110//solute carrier family 25 (mitochondrial 2-oxodicarboxylate transporter), member 21;K10380//ankyrin;K16261//yeast amino acid transporter;K02155//V-type H+-transporting ATPase 16kDa proteolipid subunit;K00777	gi|345562721|gb|EGX45757.1|//hypothetical protein AOL_s00140g73 [Arthrobotrys oligospora ATCC 24927]
AOL_s00043g179	2547	0.07	53.98	9.59085	5.85222e-213	1.04488e-211	Up	NA	NA	NA	K06640//serine/threonine-protein kinase ATR [EC:2.7.11.1]	gi|345569524|gb|EGX52390.1|//hypothetical protein AOL_s00043g179 [Arthrobotrys oligospora ATCC 24927]
AOL_s00173g13	1420	0.01	7.63	9.57554	2.13202e-17	6.0803e-17	Up	NA	NA	NA	K01264//aminopeptidase Y [EC:3.4.11.15];K01302//carboxypeptidase Q [EC:3.4.17.-]	gi|345561840|gb|EGX44912.1|//hypothetical protein AOL_s00173g13 [Arthrobotrys oligospora ATCC 24927]
AOL_s00078g408	480	0.01	7.55	9.56033	2.3102e-05	4.074e-05	Up	NA	NA	NA	NA	gi|345566432|gb|EGX49375.1|//hypothetical protein AOL_s00078g408 [Arthrobotrys oligospora ATCC 24927]
AOL_s00006g354	618	0.01	7.54	9.55842	6.6179e-07	1.2712e-06	Up	NA	GO:0016740//transferase activity	NA	K00750//glycogenin glucosyltransferase [EC:2.4.1.186]	gi|345570667|gb|EGX53488.1|//hypothetical protein AOL_s00006g354 [Arthrobotrys oligospora ATCC 24927]
AOL_s00110g246	2311	0.01	7.51	9.55267	1.17816e-26	4.22001e-26	Up	NA	NA	NA	NA	gi|345563078|gb|EGX46082.1|//hypothetical protein AOL_s00110g246 [Arthrobotrys oligospora ATCC 24927]
AOL_s00169g183	837	0.01	7.49	9.54882	1.10521e-09	2.43397e-09	Up	NA	NA	NA	NA	gi|345562509|gb|EGX45577.1|//hypothetical protein AOL_s00169g183 [Arthrobotrys oligospora ATCC 24927]
AOL_s00193g41	1464	0.01	7.43	9.53722	4.33886e-17	1.2254e-16	Up	NA	GO:0016772//transferase activity, transferring phosphorus-containing groups	NA	K00972//UDP-N-acetylglucosamine/UDP-N-acetylgalactosamine diphosphorylase [EC:2.7.7.23 2.7.7.83]	gi|345561217|gb|EGX44313.1|//hypothetical protein AOL_s00193g41 [Arthrobotrys oligospora ATCC 24927]
AOL_s00188g158	1926	0.01	7.38	9.52748	1.21011e-22	3.98525e-22	Up	NA	NA	NA	NA	gi|345561401|gb|EGX44490.1|//hypothetical protein AOL_s00188g158 [Arthrobotrys oligospora ATCC 24927]
AOL_s00109g58	642	0.01	7.38	9.52748	6.6179e-07	1.27147e-06	Up	NA	NA	NA	NA	gi|345563486|gb|EGX46486.1|//hypothetical protein AOL_s00109g58 [Arthrobotrys oligospora ATCC 24927]
AOL_s00054g936	4915	0.01	7.37	9.52552	5.11726e-72	3.58863e-71	Up	NA	NA	NA	K01279//tripeptidyl-peptidase I [EC:3.4.14.9];K00777;K14855//ribosome assembly protein 4	gi|345567948|gb|EGX50850.1|//hypothetical protein AOL_s00054g936 [Arthrobotrys oligospora ATCC 24927]
AOL_s00004g98	890	0.01	7.35	9.5216	5.43074e-10	1.21145e-09	Up	GO:0031224//intrinsic component of membrane	GO:0004311//farnesyltranstransferase activity	GO:0006629//lipid metabolic process	K00801//farnesyl-diphosphate farnesyltransferase [EC:2.5.1.21]	gi|345571251|gb|EGX54065.1|//hypothetical protein AOL_s00004g98 [Arthrobotrys oligospora ATCC 24927]
AOL_s00215g275	828	0.01	7.33	9.51767	2.24922e-09	4.88187e-09	Up	NA	NA	NA	NA	gi|345560414|gb|EGX43539.1|//hypothetical protein AOL_s00215g275 [Arthrobotrys oligospora ATCC 24927]
AOL_s00080g387	1776	0.01	7.31	9.51373	1.47464e-19	4.46804e-19	Up	NA	NA	NA	NA	gi|345565311|gb|EGX48262.1|//hypothetical protein AOL_s00080g387 [Arthrobotrys oligospora ATCC 24927]
AOL_s00088g37	1452	0.01	7.31	9.51373	8.83004e-17	2.46839e-16	Up	NA	NA	NA	NA	gi|345564354|gb|EGX47322.1|//hypothetical protein AOL_s00088g37 [Arthrobotrys oligospora ATCC 24927]
AOL_s00083g332	606	0.01	7.22	9.49586	1.34681e-06	2.55439e-06	Up	NA	NA	NA	K15541//protein MPE1;K15428//Cys-Gly metallodipeptidase DUG1 [EC:3.4.13.-]	gi|345564562|gb|EGX47523.1|//hypothetical protein AOL_s00083g332 [Arthrobotrys oligospora ATCC 24927]
AOL_s00075g12	987	0.01	7.21	9.49386	6.44318e-11	1.49157e-10	Up	NA	NA	NA	NA	gi|345567658|gb|EGX50586.1|//hypothetical protein AOL_s00075g12 [Arthrobotrys oligospora ATCC 24927]
AOL_s00054g730	396	0.01	7.12	9.47573	0.000396274	0.00064354	Up	NA	NA	NA	NA	gi|345568093|gb|EGX50994.1|//hypothetical protein AOL_s00054g730 [Arthrobotrys oligospora ATCC 24927]
AOL_s00088g13	642	0.34	241.87	9.47448	3.45914e-210	6.15252e-209	Up	NA	NA	NA	NA	gi|345564330|gb|EGX47298.1|//hypothetical protein AOL_s00088g13 [Arthrobotrys oligospora ATCC 24927]
AOL_s00110g312	2338	0.01	7.11	9.47371	7.12854e-49	3.76419e-48	Up	NA	NA	NA	K11236//cell division control protein 24	gi|345563144|gb|EGX46148.1|//hypothetical protein AOL_s00110g312 [Arthrobotrys oligospora ATCC 24927];gi|345563143|gb|EGX46147.1|//hypothetical protein AOL_s00110g311 [Arthrobotrys oligospora ATCC 24927]
AOL_s00054g893	1576	0.01	7.05	9.46148	1.797e-16	4.98306e-16	Up	NA	NA	NA	NA	gi|345567905|gb|EGX50807.1|//hypothetical protein AOL_s00054g893 [Arthrobotrys oligospora ATCC 24927]
AOL_s00170g79	844	0.01	7.04	9.45943	2.18984e-13	5.51901e-13	Up	NA	NA	NA	K05747//Wiskott-Aldrich syndrome protein;K13171//serine/arginine repetitive matrix protein 1	gi|345562303|gb|EGX45372.1|//hypothetical protein AOL_s00170g79 [Arthrobotrys oligospora ATCC 24927]
AOL_s00078g299	562	0.01	7.03	9.45738	5.578e-06	1.01995e-05	Up	NA	NA	NA	NA	gi|345566323|gb|EGX49266.1|//hypothetical protein AOL_s00078g299 [Arthrobotrys oligospora ATCC 24927]
AOL_s00004g29	993	0.01	7.03	9.45738	6.44318e-11	1.4912e-10	Up	NA	NA	NA	NA	gi|345571567|gb|EGX54380.1|//hypothetical protein AOL_s00004g29 [Arthrobotrys oligospora ATCC 24927]
AOL_s00078g115	777	0.01	6.93	9.43671	3.85812e-08	7.93417e-08	Up	NA	NA	NA	K00777	gi|345566684|gb|EGX49626.1|//hypothetical protein AOL_s00078g115 [Arthrobotrys oligospora ATCC 24927]
AOL_s00043g301	1536	0.01	6.84	9.41785	2.18984e-13	5.51752e-13	Up	NA	NA	NA	NA	gi|345569291|gb|EGX52158.1|//hypothetical protein AOL_s00043g301 [Arthrobotrys oligospora ATCC 24927]
AOL_s00007g125	1160	0.01	6.82	9.41363	1.84573e-12	4.5174e-12	Up	NA	NA	NA	NA	gi|345569964|gb|EGX52789.1|//hypothetical protein AOL_s00007g125 [Arthrobotrys oligospora ATCC 24927]
AOL_s00215g367	2298	0.01	6.77	9.40301	8.83004e-17	2.46691e-16	Up	NA	NA	NA	NA	gi|345560506|gb|EGX43631.1|//hypothetical protein AOL_s00215g367 [Arthrobotrys oligospora ATCC 24927]
AOL_s00076g599	420	0.01	6.76	9.40088	0.000396274	0.000642756	Up	NA	GO:0016787//hydrolase activity	NA	K01277//dipeptidyl-peptidase III [EC:3.4.14.4]	gi|345567020|gb|EGX49958.1|//hypothetical protein AOL_s00076g599 [Arthrobotrys oligospora ATCC 24927]
AOL_s00076g388	3164	0.01	6.75	9.39874	2.52948e-18	7.40413e-18	Up	GO:0044424//intracellular part	GO:0032559//adenyl ribonucleotide binding;GO:0004812//aminoacyl-tRNA ligase activity	GO:0006418//tRNA aminoacylation for protein translation	K01869//leucyl-tRNA synthetase [EC:6.1.1.4]	gi|345567101|gb|EGX50037.1|//hypothetical protein AOL_s00076g388 [Arthrobotrys oligospora ATCC 24927]
AOL_s00088g45	960	0.01	6.64	9.37504	5.43074e-10	1.21203e-09	Up	NA	NA	NA	NA	gi|345564362|gb|EGX47330.1|//hypothetical protein AOL_s00088g45 [Arthrobotrys oligospora ATCC 24927]
AOL_s00210g209	1863	0.01	6.63	9.37287	9.66816e-30	3.66588e-29	Up	NA	NA	NA	K11648//SWI/SNF-related matrix-associated actin-dependent regulator of chromatin subfamily B member 1;K11361//transcription factor SPT20;K03126//transcription initiation factor TFIID subunit 12;K14005//protein transport protein SEC31;K12183//ESCRT-I complex subunit TSG101	gi|345560931|gb|EGX44048.1|//hypothetical protein AOL_s00210g209 [Arthrobotrys oligospora ATCC 24927]
AOL_s00076g494	696	0.01	6.62	9.37069	6.6179e-07	1.27068e-06	Up	NA	GO:0003824//catalytic activity	GO:0008152//metabolic process	K00100;K17647//versiconal hemiacetal acetate reductase [EC:1.1.1.353]	gi|345567071|gb|EGX50008.1|//hypothetical protein AOL_s00076g494 [Arthrobotrys oligospora ATCC 24927]
AOL_s00176g59	927	0.01	6.57	9.35975	2.18984e-13	5.522e-13	Up	NA	NA	NA	NA	gi|345561813|gb|EGX44888.1|//hypothetical protein AOL_s00176g59 [Arthrobotrys oligospora ATCC 24927]
AOL_s00078g597	3250	0.01	6.5	9.3443	6.51058e-36	2.78726e-35	Up	NA	NA	NA	NA	gi|345566269|gb|EGX49213.1|//hypothetical protein AOL_s00078g597 [Arthrobotrys oligospora ATCC 24927]
AOL_s00083g412	494	0.01	6.49	9.34207	9.56806e-05	0.000161812	Up	NA	NA	NA	NA	gi|345564514|gb|EGX47476.1|//hypothetical protein AOL_s00083g412 [Arthrobotrys oligospora ATCC 24927]
AOL_s00006g574	1596	0.01	6.48	9.33985	1.797e-16	4.97862e-16	Up	NA	NA	NA	NA	gi|345570373|gb|EGX53196.1|//hypothetical protein AOL_s00006g574 [Arthrobotrys oligospora ATCC 24927]
AOL_s00054g919	874	0.01	6.43	9.32867	3.75626e-12	9.08835e-12	Up	NA	NA	NA	NA	gi|345567931|gb|EGX50833.1|//hypothetical protein AOL_s00054g919 [Arthrobotrys oligospora ATCC 24927]
AOL_s00210g115	816	0.01	6.39	9.31967	3.85812e-08	7.93242e-08	Up	NA	NA	NA	K16795//platelet-activating factor acetylhydrolase IB subunit beta/gamma [EC:3.1.1.47]	gi|345561018|gb|EGX44134.1|//hypothetical protein AOL_s00210g115 [Arthrobotrys oligospora ATCC 24927]
AOL_s00169g114	1477	0.01	6.28	9.29462	1.07603e-13	2.73781e-13	Up	NA	NA	NA	NA	gi|345562440|gb|EGX45508.1|//hypothetical protein AOL_s00169g114 [Arthrobotrys oligospora ATCC 24927]
AOL_s00215g654	864	0.01	6.23	9.28309	1.89579e-08	3.95097e-08	Up	NA	NA	NA	NA	gi|345560069|gb|EGX43198.1|//hypothetical protein AOL_s00215g654 [Arthrobotrys oligospora ATCC 24927]
AOL_s00007g247	2746	0.01	6.22	9.28077	1.797e-16	4.98455e-16	Up	NA	NA	NA	NA	gi|345570086|gb|EGX52911.1|//hypothetical protein AOL_s00007g247 [Arthrobotrys oligospora ATCC 24927]
AOL_s00170g14	444	0.01	6.2	9.27612	0.000396274	0.00064242	Up	NA	NA	NA	NA	gi|345562238|gb|EGX45307.1|//hypothetical protein AOL_s00170g14 [Arthrobotrys oligospora ATCC 24927]
AOL_s00043g782	544	0.01	6.15	9.26444	2.7409e-06	5.11518e-06	Up	NA	NA	NA	NA	gi|345568893|gb|EGX51763.1|//hypothetical protein AOL_s00043g782 [Arthrobotrys oligospora ATCC 24927]
AOL_s00215g847	924	0.01	6.15	9.26444	9.31544e-09	1.96871e-08	Up	NA	NA	NA	NA	gi|345559930|gb|EGX43061.1|//hypothetical protein AOL_s00215g847 [Arthrobotrys oligospora ATCC 24927]
AOL_s00043g447	2291	0.01	6.13	9.25974	1.27663e-14	3.34784e-14	Up	NA	GO:0003824//catalytic activity	NA	K00545//catechol O-methyltransferase [EC:2.1.1.6]	gi|345569189|gb|EGX52057.1|//hypothetical protein AOL_s00043g447 [Arthrobotrys oligospora ATCC 24927]
AOL_s00117g37	1560	0.01	6.12	9.25739	3.08244e-15	8.22926e-15	Up	NA	NA	NA	NA	gi|345562819|gb|EGX45832.1|//hypothetical protein AOL_s00117g37 [Arthrobotrys oligospora ATCC 24927]
AOL_s00054g161	597	0.01	6.06	9.24317	2.3102e-05	4.06938e-05	Up	NA	NA	NA	K00993//ethanolaminephosphotransferase [EC:2.7.8.1];K15030//translation initiation factor 3 subunit M	gi|345568569|gb|EGX51462.1|//hypothetical protein AOL_s00054g161 [Arthrobotrys oligospora ATCC 24927]
AOL_s00110g281	2036	0.01	6.01	9.23122	3.65708e-16	1.00454e-15	Up	NA	NA	NA	NA	gi|345563113|gb|EGX46117.1|//hypothetical protein AOL_s00110g281 [Arthrobotrys oligospora ATCC 24927]
AOL_s00169g202	786	0.01	5.88	9.19967	3.25188e-07	6.36445e-07	Up	NA	NA	NA	NA	gi|345562528|gb|EGX45596.1|//hypothetical protein AOL_s00169g202 [Arthrobotrys oligospora ATCC 24927]
AOL_s00004g134	1565	0.01	5.84	9.18982	1.27663e-14	3.34595e-14	Up	NA	NA	NA	K11245//mating pheromone-induced death protein 2	gi|345571287|gb|EGX54101.1|//hypothetical protein AOL_s00004g134 [Arthrobotrys oligospora ATCC 24927]
AOL_s00054g580	466	0.01	5.8	9.17991	0.000396274	0.000643764	Up	NA	NA	NA	NA	gi|345568307|gb|EGX51204.1|//hypothetical protein AOL_s00054g580 [Arthrobotrys oligospora ATCC 24927]
AOL_s00076g183	627	0.01	5.79	9.17742	1.13518e-05	2.04205e-05	Up	NA	NA	NA	NA	gi|345567487|gb|EGX50419.1|//hypothetical protein AOL_s00076g183 [Arthrobotrys oligospora ATCC 24927]
AOL_s00004g6	465	0.01	5.78	9.17493	5.578e-06	1.01875e-05	Up	NA	NA	NA	NA	gi|345571544|gb|EGX54357.1|//hypothetical protein AOL_s00004g6 [Arthrobotrys oligospora ATCC 24927]
AOL_s00080g263	661	0.01	5.78	9.17493	5.578e-06	1.01855e-05	Up	NA	NA	NA	K05864//peptidyl-prolyl isomerase D [EC:5.2.1.8]	gi|345565685|gb|EGX48634.1|//hypothetical protein AOL_s00080g263 [Arthrobotrys oligospora ATCC 24927]
AOL_s00054g977	2688	0.01	5.72	9.15987	8.36994e-25	2.8711e-24	Up	NA	NA	NA	K00888//phosphatidylinositol 4-kinase [EC:2.7.1.67]	gi|345567989|gb|EGX50891.1|//hypothetical protein AOL_s00054g977 [Arthrobotrys oligospora ATCC 24927]
AOL_s00004g148	471	0.01	5.71	9.15735	1.34681e-06	2.55699e-06	Up	GO:0044464//cell part	GO:0003824//catalytic activity;GO:0050662//coenzyme binding;GO:0016899//oxidoreductase activity, acting on the CH-OH group of donors, oxygen as acceptor	GO:0008152//metabolic process	NA	gi|345571301|gb|EGX54115.1|//hypothetical protein AOL_s00004g148 [Arthrobotrys oligospora ATCC 24927]
AOL_s00006g552	1436	0.01	5.69	9.15228	4.45654e-13	1.11384e-12	Up	NA	NA	NA	K16815//calcium-independent phospholipase A2-gamma;K00600//glycine hydroxymethyltransferase [EC:2.1.2.1]	gi|345570351|gb|EGX53174.1|//hypothetical protein AOL_s00006g552 [Arthrobotrys oligospora ATCC 24927];gi|587682298|gb|EWZ28903.1|//hypothetical protein FOZG_17459 [Fusarium oxysporum Fo47]
AOL_s00076g447	2062	0.01	5.69	9.15228	4.22432e-21	1.34555e-20	Up	NA	NA	NA	NA	gi|345567160|gb|EGX50096.1|//hypothetical protein AOL_s00076g447 [Arthrobotrys oligospora ATCC 24927]
AOL_s00210g194	603	0.01	5.69	9.15228	2.3102e-05	4.06477e-05	Up	NA	NA	NA	NA	gi|345560916|gb|EGX44033.1|//hypothetical protein AOL_s00210g194 [Arthrobotrys oligospora ATCC 24927]
AOL_s00210g81	1575	0.01	5.67	9.1472	2.59808e-14	6.743e-14	Up	NA	NA	NA	NA	gi|345561094|gb|EGX44209.1|//hypothetical protein AOL_s00210g81 [Arthrobotrys oligospora ATCC 24927]
AOL_s00054g557	1513	0.01	5.65	9.14211	1.07603e-13	2.73706e-13	Up	NA	NA	NA	NA	gi|345568284|gb|EGX51181.1|//hypothetical protein AOL_s00054g557 [Arthrobotrys oligospora ATCC 24927]
AOL_s00078g468	656	0.01	5.64	9.13955	1.13518e-05	2.04008e-05	Up	NA	NA	NA	K03846//alpha-1,2-mannosyltransferase [EC:2.4.1.259 2.4.1.261]	gi|345566492|gb|EGX49435.1|//hypothetical protein AOL_s00078g468 [Arthrobotrys oligospora ATCC 24927]
AOL_s00188g159	1317	0.01	5.6	9.12928	1.74956e-20	5.45165e-20	Up	NA	NA	NA	NA	gi|345561402|gb|EGX44491.1|//hypothetical protein AOL_s00188g159 [Arthrobotrys oligospora ATCC 24927]
AOL_s00007g290	1705	0.01	5.6	9.12928	3.75626e-12	9.08364e-12	Up	NA	GO:0070011//peptidase activity, acting on L-amino acid peptides	NA	K08637//carboxypeptidase A4 [EC:3.4.17.-];K08783//extracellular matrix protein 14 [EC:3.4.17.-]	gi|345570129|gb|EGX52954.1|//hypothetical protein AOL_s00007g290 [Arthrobotrys oligospora ATCC 24927]
AOL_s00006g533	1120	0.01	5.59	9.1267	5.43074e-10	1.21232e-09	Up	NA	NA	NA	NA	gi|345570332|gb|EGX53155.1|//hypothetical protein AOL_s00006g533 [Arthrobotrys oligospora ATCC 24927]
AOL_s00004g613	681	0.01	5.58	9.12412	5.578e-06	1.01955e-05	Up	NA	GO:0003824//catalytic activity;GO:0051540//metal cluster binding	NA	K04070//putative pyruvate formate lyase activating enzyme [EC:1.97.1.4]	gi|345571139|gb|EGX53954.1|//hypothetical protein AOL_s00004g613 [Arthrobotrys oligospora ATCC 24927]
AOL_s00006g441	510	0.01	5.55	9.11634	0.00019472	0.000321657	Up	NA	NA	NA	K17065//dynamin 1-like protein [EC:3.6.5.5]	gi|345570754|gb|EGX53575.1|//hypothetical protein AOL_s00006g441 [Arthrobotrys oligospora ATCC 24927]
AOL_s00210g350	831	0.01	5.47	9.0954	3.25188e-07	6.3698e-07	Up	NA	NA	NA	NA	gi|345560784|gb|EGX43903.1|//hypothetical protein AOL_s00210g350 [Arthrobotrys oligospora ATCC 24927]
AOL_s00097g120	3737	0.09	48.99	9.08835	1.31373e-245	2.78272e-244	Up	NA	NA	NA	NA	gi|345564093|gb|EGX47074.1|//hypothetical protein AOL_s00097g120 [Arthrobotrys oligospora ATCC 24927]
AOL_s00176g104	835	0.01	5.44	9.08746	3.25188e-07	6.37248e-07	Up	NA	GO:0046872//metal ion binding;GO:0005506//iron ion binding;GO:0016491//oxidoreductase activity	GO:0008152//metabolic process	K17827//fumitremorgin C synthase [EC:1.14.21.10];K00517;K17651//aflatoxin B synthase [EC:1.14.13.175]	gi|345561746|gb|EGX44822.1|//hypothetical protein AOL_s00176g104 [Arthrobotrys oligospora ATCC 24927]
AOL_s00210g151	733	0.01	5.43	9.08481	2.7409e-06	5.11108e-06	Up	NA	NA	NA	NA	gi|345560873|gb|EGX43990.1|//hypothetical protein AOL_s00210g151 [Arthrobotrys oligospora ATCC 24927]
AOL_s00006g186	2252	0.01	5.38	9.07146	1.47464e-19	4.46513e-19	Up	NA	NA	NA	K11236//cell division control protein 24	gi|345570499|gb|EGX53320.1|//hypothetical protein AOL_s00006g186 [Arthrobotrys oligospora ATCC 24927]
AOL_s00006g550	4500	0.01	5.35	9.0634	5.34266e-39	2.39969e-38	Up	NA	NA	NA	K17535//serine/threonine-protein kinase TNNI3K [EC:2.7.11.1];K14997//solute carrier family 38 (sodium-coupled neutral amino acid transporter), member 11	gi|345570349|gb|EGX53172.1|//hypothetical protein AOL_s00006g550 [Arthrobotrys oligospora ATCC 24927]
AOL_s00080g365	566	0.01	5.33	9.05799	9.56806e-05	0.000161782	Up	NA	NA	NA	NA	gi|345565289|gb|EGX48240.1|//hypothetical protein AOL_s00080g365 [Arthrobotrys oligospora ATCC 24927]
BGI_novel_G000029	1352	0.01	5.31	9.05257	1.55571e-11	3.68748e-11	Up	NA	NA	NA	NA	gi|345563332|gb|EGX46335.1|//hypothetical protein AOL_s00110g159 [Arthrobotrys oligospora ATCC 24927]
AOL_s00215g183	1473	0.01	5.26	9.03892	1.84573e-12	4.51621e-12	Up	NA	NA	NA	K11702//beta-1,2-xylosyltransferase [EC:2.4.2.-]	gi|345560322|gb|EGX43447.1|//hypothetical protein AOL_s00215g183 [Arthrobotrys oligospora ATCC 24927]
AOL_s00043g50	607	0.01	5.23	9.03067	0.000396274	0.000641974	Up	NA	NA	NA	K14797//essential nuclear protein 1	gi|345569395|gb|EGX52261.1|//hypothetical protein AOL_s00043g50 [Arthrobotrys oligospora ATCC 24927]
AOL_s00097g547	514	0.01	5.2	9.02237	0.000396274	0.000642867	Up	NA	NA	NA	NA	gi|345563657|gb|EGX46643.1|//hypothetical protein AOL_s00097g547 [Arthrobotrys oligospora ATCC 24927]
AOL_s00083g214	1238	0.31	160.35	9.01474	2.28218e-297	5.81145e-296	Up	NA	NA	NA	NA	gi|345564746|gb|EGX47706.1|//hypothetical protein AOL_s00083g214 [Arthrobotrys oligospora ATCC 24927]
AOL_s00173g243	2710	0.14	72.2	9.01043	1.37587e-126	1.53386e-125	Up	NA	NA	NA	NA	gi|345562070|gb|EGX45142.1|//hypothetical protein AOL_s00173g243 [Arthrobotrys oligospora ATCC 24927]
AOL_s00078g287	915	0.01	5.14	9.00562	1.59789e-07	3.17399e-07	Up	NA	NA	NA	NA	gi|345566311|gb|EGX49254.1|//hypothetical protein AOL_s00078g287 [Arthrobotrys oligospora ATCC 24927]
AOL_s00054g740	1136	0.01	5.14	9.00562	2.24922e-09	4.87959e-09	Up	NA	NA	NA	NA	gi|345568103|gb|EGX51004.1|//hypothetical protein AOL_s00054g740 [Arthrobotrys oligospora ATCC 24927]
AOL_s00043g167	510	0.01	5.13	9.00282	0.000396274	0.000643876	Up	NA	NA	NA	NA	gi|345569512|gb|EGX52378.1|//hypothetical protein AOL_s00043g167 [Arthrobotrys oligospora ATCC 24927]
AOL_s00210g354	1362	0.01	5.13	9.00282	3.16602e-11	7.42322e-11	Up	NA	NA	NA	NA	gi|345560788|gb|EGX43907.1|//hypothetical protein AOL_s00210g354 [Arthrobotrys oligospora ATCC 24927]
AOL_s00169g142	1584	0.01	5.08	8.98868	6.27306e-15	1.66141e-14	Up	NA	NA	NA	NA	gi|345562468|gb|EGX45536.1|//hypothetical protein AOL_s00169g142 [Arthrobotrys oligospora ATCC 24927]
AOL_s00210g190	781	0.01	5.08	8.98868	4.45654e-13	1.11324e-12	Up	NA	NA	NA	NA	gi|345560912|gb|EGX44029.1|//hypothetical protein AOL_s00210g190 [Arthrobotrys oligospora ATCC 24927]
AOL_s00006g576	2037	0.01	4.93	8.94544	1.55571e-11	3.68654e-11	Up	NA	GO:0004553//hydrolase activity, hydrolyzing O-glycosyl compounds;GO:0016787//hydrolase activity;GO:0030247//polysaccharide binding;GO:0005488//binding;GO:0016798//hydrolase activity, acting on glycosyl bonds;GO:0043167//ion binding	GO:0008152//metabolic process;GO:0005975//carbohydrate metabolic process;GO:0006026//aminoglycan catabolic process	K01183//chitinase [EC:3.2.1.14]	gi|345570375|gb|EGX53198.1|//hypothetical protein AOL_s00006g576 [Arthrobotrys oligospora ATCC 24927]
AOL_s00006g586	1197	0.01	4.85	8.92184	2.24922e-09	4.89098e-09	Up	NA	GO:0004553//hydrolase activity, hydrolyzing O-glycosyl compounds	GO:0019566//arabinose metabolic process;GO:0000272//polysaccharide catabolic process	NA	gi|345570385|gb|EGX53208.1|//hypothetical protein AOL_s00006g586 [Arthrobotrys oligospora ATCC 24927]
AOL_s00083g219	1561	0.01	4.84	8.91886	3.75626e-12	9.09308e-12	Up	NA	NA	NA	NA	gi|345564751|gb|EGX47711.1|//hypothetical protein AOL_s00083g219 [Arthrobotrys oligospora ATCC 24927]
AOL_s00079g106	1621	0.12	58.07	8.91861	7.47402e-130	8.51563e-129	Up	NA	NA	NA	NA	gi|345565938|gb|EGX48885.1|//hypothetical protein AOL_s00079g106 [Arthrobotrys oligospora ATCC 24927]
AOL_s00083g257	629	0.01	4.83	8.91588	9.56806e-05	0.00016187	Up	NA	NA	NA	K18732//SAP domain-containing ribonucleoprotein	gi|345564789|gb|EGX47749.1|//hypothetical protein AOL_s00083g257 [Arthrobotrys oligospora ATCC 24927]
AOL_s00210g265	5165	0.01	4.83	8.91588	1.53048e-40	7.05444e-40	Up	NA	NA	NA	K14997//solute carrier family 38 (sodium-coupled neutral amino acid transporter), member 11	gi|345560831|gb|EGX43949.1|//hypothetical protein AOL_s00210g265 [Arthrobotrys oligospora ATCC 24927]
AOL_s00076g484	1363	0.01	4.8	8.90689	2.66854e-10	6.01325e-10	Up	NA	NA	NA	NA	gi|345567061|gb|EGX49998.1|//hypothetical protein AOL_s00076g484 [Arthrobotrys oligospora ATCC 24927]
AOL_s00170g112	1741	0.06	28.79	8.90639	1.81839e-134	2.13713e-133	Up	NA	NA	NA	NA	gi|345562336|gb|EGX45405.1|//hypothetical protein AOL_s00170g112 [Arthrobotrys oligospora ATCC 24927]
AOL_s00076g85	1032	0.01	4.77	8.89785	1.10521e-09	2.43282e-09	Up	NA	NA	NA	NA	gi|345567389|gb|EGX50321.1|//hypothetical protein AOL_s00076g85 [Arthrobotrys oligospora ATCC 24927]
AOL_s00210g65	2399	0.01	4.76	8.89482	3.65708e-16	1.00424e-15	Up	NA	NA	NA	NA	gi|345561078|gb|EGX44193.1|//hypothetical protein AOL_s00210g65 [Arthrobotrys oligospora ATCC 24927]
AOL_s00110g311	787	0.01	4.76	8.89482	5.578e-06	1.01915e-05	Up	NA	NA	NA	NA	gi|345563143|gb|EGX46147.1|//hypothetical protein AOL_s00110g311 [Arthrobotrys oligospora ATCC 24927]
AOL_s00110g143	1347	0.01	4.73	8.8857	2.66854e-10	6.01907e-10	Up	NA	NA	NA	K01126//glycerophosphoryl diester phosphodiesterase [EC:3.1.4.46]	gi|345563316|gb|EGX46319.1|//hypothetical protein AOL_s00110g143 [Arthrobotrys oligospora ATCC 24927]
AOL_s00004g250	789	0.01	4.7	8.87652	5.578e-06	1.01975e-05	Up	NA	NA	NA	K00680	gi|345571403|gb|EGX54217.1|//hypothetical protein AOL_s00004g250 [Arthrobotrys oligospora ATCC 24927]
AOL_s00043g136	295	0.74	345.37	8.8664	7.01344e-98	6.26704e-97	Up	NA	GO:0016791//phosphatase activity	NA	K01092//myo-inositol-1(or 4)-monophosphatase [EC:3.1.3.25]	gi|345569481|gb|EGX52347.1|//hypothetical protein AOL_s00043g136 [Arthrobotrys oligospora ATCC 24927]
AOL_s00007g268	3712	0.24	111.9	8.86496	0	0	Up	NA	NA	NA	NA	gi|345570107|gb|EGX52932.1|//hypothetical protein AOL_s00007g268 [Arthrobotrys oligospora ATCC 24927]
AOL_s00006g339	1147	0.01	4.64	8.85798	1.89579e-08	3.95008e-08	Up	NA	NA	NA	NA	gi|345570652|gb|EGX53473.1|//hypothetical protein AOL_s00006g339 [Arthrobotrys oligospora ATCC 24927]
AOL_s00193g14	717	0.01	4.62	8.85175	4.70152e-05	8.12651e-05	Up	NA	GO:0016787//hydrolase activity	GO:0008152//metabolic process	K13566//omega-amidase [EC:3.5.1.3];K01501//nitrilase [EC:3.5.5.1]	gi|345561190|gb|EGX44286.1|//hypothetical protein AOL_s00193g14 [Arthrobotrys oligospora ATCC 24927]
AOL_s00170g38	904	0.01	4.6	8.84549	3.00106e-19	8.99932e-19	Up	NA	NA	NA	NA	gi|345562262|gb|EGX45331.1|//hypothetical protein AOL_s00170g38 [Arthrobotrys oligospora ATCC 24927]
AOL_s00215g473	2832	0.01	4.58	8.8392	4.22432e-21	1.34417e-20	Up	NA	NA	NA	NA	gi|345560612|gb|EGX43737.1|//hypothetical protein AOL_s00215g473 [Arthrobotrys oligospora ATCC 24927]
AOL_s00075g70	6029	0.01	4.57	8.83605	7.32186e-45	3.64529e-44	Up	NA	NA	NA	K12828//splicing factor 3B subunit 1;K10380//ankyrin	gi|345567716|gb|EGX50644.1|//hypothetical protein AOL_s00075g70 [Arthrobotrys oligospora ATCC 24927]
AOL_s00007g274	1362	0.01	4.54	8.82655	3.85812e-08	7.92893e-08	Up	NA	NA	NA	NA	gi|345570113|gb|EGX52938.1|//hypothetical protein AOL_s00007g274 [Arthrobotrys oligospora ATCC 24927]
AOL_s00188g274	1155	0.01	4.51	8.81698	1.89579e-08	3.95185e-08	Up	NA	NA	NA	NA	gi|345561517|gb|EGX44606.1|//hypothetical protein AOL_s00188g274 [Arthrobotrys oligospora ATCC 24927]
AOL_s00173g218	975	0.01	4.48	8.80735	6.6179e-07	1.2733e-06	Up	NA	GO:0016812//hydrolase activity, acting on carbon-nitrogen (but not peptide) bonds, in cyclic amides;GO:0003824//catalytic activity	GO:0006206//pyrimidine nucleobase metabolic process	K01465//dihydroorotase [EC:3.5.2.3]	gi|345562045|gb|EGX45117.1|//hypothetical protein AOL_s00173g218 [Arthrobotrys oligospora ATCC 24927]
AOL_s00006g484	784	0.01	4.46	8.8009	1.13518e-05	2.04048e-05	Up	NA	NA	NA	NA	gi|345570401|gb|EGX53223.1|//hypothetical protein AOL_s00006g484 [Arthrobotrys oligospora ATCC 24927]
AOL_s00006g500	2809	0.01	4.43	8.79116	1.61461e-32	6.45291e-32	Up	NA	NA	NA	K02831//ser/thr/tyr protein kinase RAD53 [EC:2.7.11.-]	gi|345570417|gb|EGX53239.1|//hypothetical protein AOL_s00006g500 [Arthrobotrys oligospora ATCC 24927]
AOL_s00004g96	3528	0.01	4.41	8.78463	1.61461e-32	6.45014e-32	Up	NA	NA	NA	NA	gi|345571249|gb|EGX54063.1|//hypothetical protein AOL_s00004g96 [Arthrobotrys oligospora ATCC 24927];gi|526200394|gb|EPS41028.1|//hypothetical protein H072_5091 [Dactylellina haptotyla CBS 200.50]
AOL_s00140g11	1627	0.01	4.35	8.76487	1.55571e-11	3.68842e-11	Up	NA	NA	NA	NA	gi|345562659|gb|EGX45695.1|//hypothetical protein AOL_s00140g11 [Arthrobotrys oligospora ATCC 24927]
AOL_s00043g599	821	0.01	4.34	8.76155	1.13518e-05	2.04166e-05	Up	NA	NA	NA	K15559//regulator of Ty1 transposition protein 103	gi|345568996|gb|EGX51865.1|//hypothetical protein AOL_s00043g599 [Arthrobotrys oligospora ATCC 24927]
AOL_s00004g319	652	0.14	60.71	8.76036	2.16598e-131	2.49838e-130	Up	NA	NA	NA	NA	gi|345571472|gb|EGX54286.1|//hypothetical protein AOL_s00004g319 [Arthrobotrys oligospora ATCC 24927]
AOL_s00078g504	668	0.01	4.33	8.75822	9.56806e-05	0.000161753	Up	NA	NA	NA	NA	gi|345566528|gb|EGX49471.1|//hypothetical protein AOL_s00078g504 [Arthrobotrys oligospora ATCC 24927]
AOL_s00078g190	721	0.01	4.3	8.74819	4.70152e-05	8.1235e-05	Up	NA	NA	NA	NA	gi|345566759|gb|EGX49701.1|//hypothetical protein AOL_s00078g190 [Arthrobotrys oligospora ATCC 24927]
AOL_s00043g477	591	0.01	4.28	8.74147	0.000396274	0.000643315	Up	NA	NA	NA	NA	gi|345569219|gb|EGX52087.1|//hypothetical protein AOL_s00043g477 [Arthrobotrys oligospora ATCC 24927]
AOL_s00004g290	2271	0.01	4.27	8.73809	2.13202e-17	6.07844e-17	Up	NA	NA	NA	K14326//regulator of nonsense transcripts 1 [EC:3.6.4.-];K14213//Xaa-Pro dipeptidase [EC:3.4.13.9]	gi|345571443|gb|EGX54257.1|//hypothetical protein AOL_s00004g290 [Arthrobotrys oligospora ATCC 24927]
AOL_s00173g339	1926	0.01	4.27	8.73809	9.31544e-09	1.96826e-08	Up	NA	NA	NA	NA	gi|345562166|gb|EGX45238.1|//hypothetical protein AOL_s00173g339 [Arthrobotrys oligospora ATCC 24927]
AOL_s00188g275	1749	0.01	4.26	8.73471	3.75626e-12	9.07893e-12	Up	NA	NA	NA	NA	gi|345561518|gb|EGX44607.1|//hypothetical protein AOL_s00188g275 [Arthrobotrys oligospora ATCC 24927]
AOL_s00110g151	916	0.01	4.2	8.71425	2.7409e-06	5.11723e-06	Up	NA	NA	NA	NA	gi|345563324|gb|EGX46327.1|//hypothetical protein AOL_s00110g151 [Arthrobotrys oligospora ATCC 24927]
AOL_s00080g349	1473	0.01	4.19	8.71081	1.34681e-06	2.55283e-06	Up	NA	GO:0005488//binding	NA	K15110//solute carrier family 25 (mitochondrial 2-oxodicarboxylate transporter), member 21;K05692//actin beta/gamma 1;K02155//V-type H+-transporting ATPase 16kDa proteolipid subunit;K00777;K14855//ribosome assembly protein 4	gi|345565273|gb|EGX48224.1|//hypothetical protein AOL_s00080g349 [Arthrobotrys oligospora ATCC 24927]
AOL_s00078g392	1511	0.01	4.17	8.7039	2.66854e-10	6.01761e-10	Up	NA	NA	NA	NA	gi|345566416|gb|EGX49359.1|//hypothetical protein AOL_s00078g392 [Arthrobotrys oligospora ATCC 24927]
AOL_s00083g279	2373	0.08	33.34	8.70304	2.98588e-109	2.89277e-108	Up	NA	NA	NA	K15110//solute carrier family 25 (mitochondrial 2-oxodicarboxylate transporter), member 21;K02155//V-type H+-transporting ATPase 16kDa proteolipid subunit;K00777	gi|345564811|gb|EGX47771.1|//hypothetical protein AOL_s00083g279 [Arthrobotrys oligospora ATCC 24927]
AOL_s00079g400	1977	0.01	4.15	8.69697	2.18984e-13	5.52499e-13	Up	NA	NA	NA	NA	gi|345565813|gb|EGX48761.1|//hypothetical protein AOL_s00079g400 [Arthrobotrys oligospora ATCC 24927]
AOL_s00097g76	1839	4.97	2054.27	8.69116	0	0	Up	NA	NA	NA	K01613//phosphatidylserine decarboxylase [EC:4.1.1.65]	gi|345564049|gb|EGX47030.1|//hypothetical protein AOL_s00097g76 [Arthrobotrys oligospora ATCC 24927]
AOL_s00054g220	4326	0.33	135.88	8.68565	0	0	Up	NA	NA	NA	K01276//dipeptidyl-peptidase II [EC:3.4.14.2];K01285//lysosomal Pro-X carboxypeptidase [EC:3.4.16.2]	gi|345568628|gb|EGX51521.1|//hypothetical protein AOL_s00054g220 [Arthrobotrys oligospora ATCC 24927]
AOL_s00006g587	2423	0.01	4.09	8.67596	3.65708e-16	1.00395e-15	Up	NA	NA	NA	NA	gi|345570386|gb|EGX53209.1|//hypothetical protein AOL_s00006g587 [Arthrobotrys oligospora ATCC 24927]
AOL_s00210g351	1057	0.01	3.98	8.63662	6.6179e-07	1.27199e-06	Up	NA	NA	NA	NA	gi|345560785|gb|EGX43904.1|//hypothetical protein AOL_s00210g351 [Arthrobotrys oligospora ATCC 24927]
AOL_s00210g134	1336	0.01	3.97	8.633	1.84573e-12	4.51858e-12	Up	NA	NA	NA	K10380//ankyrin	gi|345560856|gb|EGX43973.1|//hypothetical protein AOL_s00210g134 [Arthrobotrys oligospora ATCC 24927]
BGI_novel_G000017	683	0.01	3.93	8.61839	0.00019472	0.000321999	Up	NA	NA	NA	NA	gi|345563016|gb|EGX46020.1|//hypothetical protein AOL_s00110g184 [Arthrobotrys oligospora ATCC 24927]
AOL_s00054g517	886	0.01	3.91	8.61102	1.13518e-05	2.04284e-05	Up	NA	NA	NA	K18203//[phosphatase 2A protein]-leucine-carboxy methyltransferase [EC:2.1.1.233]	gi|345568244|gb|EGX51141.1|//hypothetical protein AOL_s00054g517 [Arthrobotrys oligospora ATCC 24927]
AOL_s00004g615	1122	0.01	3.91	8.61102	3.25188e-07	6.36846e-07	Up	NA	NA	NA	NA	gi|345571141|gb|EGX53956.1|//hypothetical protein AOL_s00004g615 [Arthrobotrys oligospora ATCC 24927]
AOL_s00080g9	1752	0.01	3.91	8.61102	3.16602e-11	7.42696e-11	Up	NA	NA	NA	K15110//solute carrier family 25 (mitochondrial 2-oxodicarboxylate transporter), member 21;K05692//actin beta/gamma 1;K02155//V-type H+-transporting ATPase 16kDa proteolipid subunit;K00777;K14855//ribosome assembly protein 4	gi|345565431|gb|EGX48380.1|//hypothetical protein AOL_s00080g9 [Arthrobotrys oligospora ATCC 24927]
AOL_s00043g368	2693	0.07	27.37	8.61102	7.30994e-114	7.34145e-113	Up	NA	NA	NA	NA	gi|345569358|gb|EGX52225.1|//hypothetical protein AOL_s00043g368 [Arthrobotrys oligospora ATCC 24927]
AOL_s00083g496	737	0.01	3.87	8.59619	0.00019472	0.000322514	Up	NA	NA	NA	K00737//beta-1,4-mannosyl-glycoprotein beta-1,4-N-acetylglucosaminyltransferase [EC:2.4.1.144]	gi|345564440|gb|EGX47403.1|//hypothetical protein AOL_s00083g496 [Arthrobotrys oligospora ATCC 24927]
AOL_s00169g165	844	0.01	3.86	8.59246	3.75626e-12	9.086e-12	Up	NA	NA	NA	NA	gi|345562491|gb|EGX45559.1|//hypothetical protein AOL_s00169g165 [Arthrobotrys oligospora ATCC 24927]
AOL_s00078g308	729	0.29	111.84	8.59117	2.51794e-112	2.49121e-111	Up	NA	NA	NA	NA	gi|345566332|gb|EGX49275.1|//hypothetical protein AOL_s00078g308 [Arthrobotrys oligospora ATCC 24927]
AOL_s00170g108	1038	0.01	3.85	8.58871	1.34681e-06	2.55595e-06	Up	NA	NA	NA	NA	gi|345562332|gb|EGX45401.1|//hypothetical protein AOL_s00170g108 [Arthrobotrys oligospora ATCC 24927]
AOL_s00169g35	488	0.1	38.49	8.58834	1.77435e-114	1.79165e-113	Up	NA	NA	NA	NA	gi|345562361|gb|EGX45429.1|//hypothetical protein AOL_s00169g35 [Arthrobotrys oligospora ATCC 24927]
AOL_s00007g296	2080	0.01	3.84	8.58496	4.45654e-13	1.11234e-12	Up	NA	GO:0008484//sulfuric ester hydrolase activity	GO:0008152//metabolic process;GO:0006066//alcohol metabolic process	K01565//N-sulfoglucosamine sulfohydrolase [EC:3.10.1.1];K01178//glucoamylase [EC:3.2.1.3];K01130//arylsulfatase [EC:3.1.6.1]	gi|345570135|gb|EGX52960.1|//hypothetical protein AOL_s00007g296 [Arthrobotrys oligospora ATCC 24927]
AOL_s00079g491	855	0.01	3.78	8.56224	2.3102e-05	4.07245e-05	Up	NA	NA	NA	K00799//glutathione S-transferase [EC:2.5.1.18]	gi|345565904|gb|EGX48852.1|//hypothetical protein AOL_s00079g491 [Arthrobotrys oligospora ATCC 24927]
AOL_s00140g1	3121	0.01	3.77	8.55842	3.00106e-19	8.99353e-19	Up	NA	NA	NA	K15110//solute carrier family 25 (mitochondrial 2-oxodicarboxylate transporter), member 21;K02155//V-type H+-transporting ATPase 16kDa proteolipid subunit;K00777	gi|345562649|gb|EGX45685.1|//hypothetical protein AOL_s00140g1 [Arthrobotrys oligospora ATCC 24927]
AOL_s00210g213	3689	0.05	18.82	8.55612	2.49584e-108	2.40302e-107	Up	NA	NA	NA	K14644//subtilase-type proteinase RRT12 [EC:3.4.21.-]	gi|345560935|gb|EGX44052.1|//hypothetical protein AOL_s00210g213 [Arthrobotrys oligospora ATCC 24927];gi|345560934|gb|EGX44051.1|//hypothetical protein AOL_s00210g212 [Arthrobotrys oligospora ATCC 24927]
AOL_s00176g46	888	0.01	3.73	8.54303	1.34681e-06	2.55335e-06	Up	NA	NA	NA	NA	gi|345561800|gb|EGX44875.1|//hypothetical protein AOL_s00176g46 [Arthrobotrys oligospora ATCC 24927]
AOL_s00006g146	1806	0.01	3.72	8.53916	1.17816e-26	4.22163e-26	Up	NA	NA	NA	K10380//ankyrin;K06694//26S proteasome non-ATPase regulatory subunit 10;K16726//ankyrin repeat domain-containing protein 17	gi|345570459|gb|EGX53280.1|//hypothetical protein AOL_s00006g146 [Arthrobotrys oligospora ATCC 24927]
AOL_s00110g322	1752	0.01	3.72	8.53916	0.00019472	0.000321942	Up	NA	NA	NA	NA	gi|345563154|gb|EGX46158.1|//hypothetical protein AOL_s00110g322 [Arthrobotrys oligospora ATCC 24927]
AOL_s00140g86	898	0.01	3.71	8.53528	2.3102e-05	4.07168e-05	Up	NA	NA	NA	NA	gi|345562734|gb|EGX45770.1|//hypothetical protein AOL_s00140g86 [Arthrobotrys oligospora ATCC 24927]
AOL_s00043g576	2077	0.01	3.71	8.53528	3.25188e-07	6.36579e-07	Up	NA	NA	NA	K15110//solute carrier family 25 (mitochondrial 2-oxodicarboxylate transporter), member 21;K01279//tripeptidyl-peptidase I [EC:3.4.14.9];K06653//CDK inhibitor PHO81;K16261//yeast amino acid transporter;K02155//V-type H+-transporting ATPase 16kDa proteolipid subunit;K00777;K12669//oligosaccharyltransferase complex subunit gamma	gi|345568973|gb|EGX51842.1|//hypothetical protein AOL_s00043g576 [Arthrobotrys oligospora ATCC 24927]
AOL_s00076g157	4793	0.2	74.19	8.53508	0	0	Up	NA	NA	NA	K10437//phenylacetate 2-hydroxylase [EC:1.14.13.-]	gi|345567461|gb|EGX50393.1|//hypothetical protein AOL_s00076g157 [Arthrobotrys oligospora ATCC 24927]
AOL_s00054g186	826	0.01	3.67	8.51964	4.70152e-05	8.12501e-05	Up	NA	NA	NA	NA	gi|345568594|gb|EGX51487.1|//hypothetical protein AOL_s00054g186 [Arthrobotrys oligospora ATCC 24927]
AOL_s00088g6	4855	0.08	29.24	8.51373	2e-305	5.14917e-304	Up	NA	NA	NA	K14758//casein kinase I homolog HRR25 [EC:2.7.11.1]	gi|345564323|gb|EGX47291.1|//hypothetical protein AOL_s00088g6 [Arthrobotrys oligospora ATCC 24927];gi|345564321|gb|EGX47289.1|//hypothetical protein AOL_s00088g4 [Arthrobotrys oligospora ATCC 24927]
AOL_s00007g103	363	0.01	3.64	8.50779	1.10521e-09	2.43339e-09	Up	NA	NA	NA	NA	gi|345569942|gb|EGX52767.1|//hypothetical protein AOL_s00007g103 [Arthrobotrys oligospora ATCC 24927]
AOL_s00210g149	704	0.01	3.64	8.50779	0.000396274	0.000643652	Up	NA	NA	NA	K00993//ethanolaminephosphotransferase [EC:2.7.8.1];K15030//translation initiation factor 3 subunit M	gi|345560871|gb|EGX43988.1|//hypothetical protein AOL_s00210g149 [Arthrobotrys oligospora ATCC 24927]
AOL_s00054g160	1119	0.01	3.61	8.49586	1.34681e-06	2.55751e-06	Up	NA	NA	NA	NA	gi|345568568|gb|EGX51461.1|//hypothetical protein AOL_s00054g160 [Arthrobotrys oligospora ATCC 24927]
AOL_s00215g497	838	0.01	3.61	8.49586	4.70152e-05	8.12953e-05	Up	NA	NA	NA	K11238//cytokinesis protein	gi|345560636|gb|EGX43761.1|//hypothetical protein AOL_s00215g497 [Arthrobotrys oligospora ATCC 24927]
AOL_s00080g359	1732	0.01	3.61	8.49586	2.66854e-10	6.0147e-10	Up	NA	NA	NA	NA	gi|345565283|gb|EGX48234.1|//hypothetical protein AOL_s00080g359 [Arthrobotrys oligospora ATCC 24927]
AOL_s00188g200	3146	0.06	21.61	8.49252	5.99996e-105	5.63706e-104	Up	NA	GO:0005488//binding	NA	K15110//solute carrier family 25 (mitochondrial 2-oxodicarboxylate transporter), member 21;K10380//ankyrin;K02155//V-type H+-transporting ATPase 16kDa proteolipid subunit;K00777	gi|345561443|gb|EGX44532.1|//hypothetical protein AOL_s00188g200 [Arthrobotrys oligospora ATCC 24927]
AOL_s00169g92	1006	0.01	3.54	8.46761	1.10521e-09	2.4311e-09	Up	NA	NA	NA	K15110//solute carrier family 25 (mitochondrial 2-oxodicarboxylate transporter), member 21;K12823//ATP-dependent RNA helicase DDX5/DBP2 [EC:3.6.4.13];K02155//V-type H+-transporting ATPase 16kDa proteolipid subunit;K00777;K16726//ankyrin repeat domain-containing protein 17	gi|345562418|gb|EGX45486.1|//hypothetical protein AOL_s00169g92 [Arthrobotrys oligospora ATCC 24927]
AOL_s00054g104	804	0.01	3.52	8.45943	9.56806e-05	0.0001619	Up	NA	NA	NA	NA	gi|345568512|gb|EGX51405.1|//hypothetical protein AOL_s00054g104 [Arthrobotrys oligospora ATCC 24927]
AOL_s00006g584	1825	0.01	3.52	8.45943	1.31125e-10	2.99238e-10	Up	NA	NA	NA	K01183//chitinase [EC:3.2.1.14]	gi|345570383|gb|EGX53206.1|//hypothetical protein AOL_s00006g584 [Arthrobotrys oligospora ATCC 24927]
AOL_s00081g109	1839	0.01	3.49	8.44708	1.31125e-10	2.99605e-10	Up	NA	NA	NA	NA	gi|345565160|gb|EGX48113.1|//hypothetical protein AOL_s00081g109 [Arthrobotrys oligospora ATCC 24927]
AOL_s00007g432	713	0.01	3.49	8.44708	5.43074e-10	1.21174e-09	Up	NA	NA	NA	K00059//3-oxoacyl-[acyl-carrier protein] reductase [EC:1.1.1.100];K14729//multifunctional beta-oxidation protein [EC:4.2.1.- 1.1.1.-]	gi|345569823|gb|EGX52649.1|//hypothetical protein AOL_s00007g432 [Arthrobotrys oligospora ATCC 24927]
AOL_s00215g752	813	0.01	3.47	8.43879	9.56806e-05	0.000162106	Up	NA	NA	NA	NA	gi|345560013|gb|EGX43143.1|//hypothetical protein AOL_s00215g752 [Arthrobotrys oligospora ATCC 24927]
AOL_s00097g121	2894	0.09	31.19	8.43694	1.51749e-129	1.72266e-128	Up	NA	NA	NA	NA	gi|345564094|gb|EGX47075.1|//hypothetical protein AOL_s00097g121 [Arthrobotrys oligospora ATCC 24927]
AOL_s00080g17	1368	0.01	3.45	8.43045	7.85166e-08	1.58874e-07	Up	NA	NA	NA	NA	gi|345565439|gb|EGX48388.1|//hypothetical protein AOL_s00080g17 [Arthrobotrys oligospora ATCC 24927]
AOL_s00078g175	1970	0.01	3.45	8.43045	3.16602e-11	7.41949e-11	Up	NA	NA	NA	K01845//glutamate-1-semialdehyde 2,1-aminomutase [EC:5.4.3.8]	gi|345566744|gb|EGX49686.1|//hypothetical protein AOL_s00078g175 [Arthrobotrys oligospora ATCC 24927]
AOL_s00173g46	770	0.01	3.41	8.41363	0.00019472	0.000321543	Up	NA	NA	NA	NA	gi|345561873|gb|EGX44945.1|//hypothetical protein AOL_s00173g46 [Arthrobotrys oligospora ATCC 24927]
AOL_s00081g270	2773	0.01	3.38	8.40088	2.52948e-18	7.39948e-18	Up	NA	NA	NA	K10380//ankyrin	gi|345564987|gb|EGX47943.1|//hypothetical protein AOL_s00081g270 [Arthrobotrys oligospora ATCC 24927]
AOL_s00083g374	2503	0.06	20.02	8.38226	1.08323e-76	7.9745e-76	Up	NA	NA	NA	NA	gi|345564476|gb|EGX47438.1|//hypothetical protein AOL_s00083g374 [Arthrobotrys oligospora ATCC 24927]
AOL_s00140g10	2234	0.05	16.54	8.36982	4.21524e-68	2.82227e-67	Up	NA	NA	NA	NA	gi|345562658|gb|EGX45694.1|//hypothetical protein AOL_s00140g10 [Arthrobotrys oligospora ATCC 24927]
AOL_s00188g326	1198	0.01	3.3	8.36632	1.51463e-15	4.08697e-15	Up	NA	NA	NA	NA	gi|345561569|gb|EGX44658.1|//hypothetical protein AOL_s00188g326 [Arthrobotrys oligospora ATCC 24927]
AOL_s00079g439	814	0.01	3.3	8.36632	1.10521e-09	2.43167e-09	Up	NA	GO:0003824//catalytic activity;GO:0016874//ligase activity	GO:0006807//nitrogen compound metabolic process	K01950//NAD+ synthase (glutamine-hydrolysing) [EC:6.3.5.1]	gi|345565852|gb|EGX48800.1|//hypothetical protein AOL_s00079g439 [Arthrobotrys oligospora ATCC 24927]
AOL_s00054g542	1141	0.01	3.29	8.36194	2.7409e-06	5.1162e-06	Up	NA	NA	NA	NA	gi|345568269|gb|EGX51166.1|//hypothetical protein AOL_s00054g542 [Arthrobotrys oligospora ATCC 24927]
AOL_s00079g299	1197	0.01	3.29	8.36194	1.34681e-06	2.55647e-06	Up	NA	NA	NA	NA	gi|345566131|gb|EGX49078.1|//hypothetical protein AOL_s00079g299 [Arthrobotrys oligospora ATCC 24927]
AOL_s00110g66	2973	0.01	3.28	8.35755	4.22432e-21	1.34509e-20	Up	NA	NA	NA	K10380//ankyrin;K15110//solute carrier family 25 (mitochondrial 2-oxodicarboxylate transporter), member 21;K01279//tripeptidyl-peptidase I [EC:3.4.14.9];K16261//yeast amino acid transporter;K02155//V-type H+-transporting ATPase 16kDa proteolipid subunit;K00777;K14963//COMPASS component SWD3	gi|345563239|gb|EGX46242.1|//hypothetical protein AOL_s00110g66 [Arthrobotrys oligospora ATCC 24927]
AOL_s00215g533	585	0.03	9.83	8.35609	3.85812e-08	7.93067e-08	Up	NA	NA	NA	NA	gi|345560672|gb|EGX43797.1|//hypothetical protein AOL_s00215g533 [Arthrobotrys oligospora ATCC 24927]
AOL_s00004g336	1097	0.01	3.25	8.3443	4.70152e-05	8.11598e-05	Up	NA	NA	NA	NA	gi|345571489|gb|EGX54303.1|//hypothetical protein AOL_s00004g336 [Arthrobotrys oligospora ATCC 24927]
AOL_s00043g163	3171	0.34	109.4	8.32986	2.59864e-279	6.11599e-278	Up	GO:0016020//membrane;GO:0005887//integral component of plasma membrane	GO:0008519//ammonium transmembrane transporter activity	GO:0006810//transport;GO:0015695//organic cation transport;GO:0072488//ammonium transmembrane transport;GO:0019740//nitrogen utilization	K03320//ammonium transporter, Amt family	gi|345569508|gb|EGX52374.1|//hypothetical protein AOL_s00043g163 [Arthrobotrys oligospora ATCC 24927]
AOL_s00007g182	1023	0.01	3.2	8.32193	2.3102e-05	4.06784e-05	Up	NA	NA	NA	NA	gi|345570021|gb|EGX52846.1|//hypothetical protein AOL_s00007g182 [Arthrobotrys oligospora ATCC 24927]
AOL_s00173g47	816	0.01	3.19	8.31741	0.00019472	0.000322113	Up	NA	NA	NA	NA	gi|345561874|gb|EGX44946.1|//hypothetical protein AOL_s00173g47 [Arthrobotrys oligospora ATCC 24927]
AOL_s00054g219	936	1.43	454.79	8.31304	0	0	Up	NA	NA	NA	NA	gi|345568627|gb|EGX51520.1|//hypothetical protein AOL_s00054g219 [Arthrobotrys oligospora ATCC 24927]
AOL_s00006g524	2144	0.01	3.16	8.30378	3.16602e-11	7.42509e-11	Up	NA	NA	NA	K10380//ankyrin;K12828//splicing factor 3B subunit 1;K16261//yeast amino acid transporter;K00777	gi|345570323|gb|EGX53146.1|//hypothetical protein AOL_s00006g524 [Arthrobotrys oligospora ATCC 24927]
AOL_s00117g77	1214	0.01	3.14	8.29462	4.57738e-09	9.79591e-09	Up	NA	NA	NA	NA	gi|345562859|gb|EGX45872.1|//hypothetical protein AOL_s00117g77 [Arthrobotrys oligospora ATCC 24927]
AOL_s00076g121	3146	0.2	62.28	8.28263	0	0	Up	NA	NA	NA	K06758//L1 cell adhesion molecule like protein;K03283//heat shock 70kDa protein 1/8;K04043//molecular chaperone DnaK;K06640//serine/threonine-protein kinase ATR [EC:2.7.11.1];K09490//heat shock 70kDa protein 5	gi|345567425|gb|EGX50357.1|//hypothetical protein AOL_s00076g121 [Arthrobotrys oligospora ATCC 24927]
AOL_s00007g4	1765	0.01	3.08	8.26679	4.57738e-09	9.79816e-09	Up	NA	NA	NA	NA	gi|345570231|gb|EGX53055.1|//hypothetical protein AOL_s00007g4 [Arthrobotrys oligospora ATCC 24927]
AOL_s00079g283	508	0.14	42.88	8.25873	7.51514e-75	5.41276e-74	Up	NA	NA	NA	NA	gi|345566115|gb|EGX49062.1|//hypothetical protein AOL_s00079g283 [Arthrobotrys oligospora ATCC 24927]
AOL_s00188g358	1533	0.01	3.05	8.25267	7.85166e-08	1.58702e-07	Up	NA	NA	NA	NA	gi|345561363|gb|EGX44453.1|//hypothetical protein AOL_s00188g358 [Arthrobotrys oligospora ATCC 24927]
AOL_s00097g83	2471	0.08	23.86	8.22038	1.65455e-90	1.39299e-89	Up	NA	NA	NA	NA	gi|345564056|gb|EGX47037.1|//hypothetical protein AOL_s00097g83 [Arthrobotrys oligospora ATCC 24927]
AOL_s00083g392	2022	0.01	2.98	8.21917	5.43074e-10	1.21261e-09	Up	NA	NA	NA	NA	gi|345564494|gb|EGX47456.1|//hypothetical protein AOL_s00083g392 [Arthrobotrys oligospora ATCC 24927]
AOL_s00007g225	1378	0.01	2.97	8.21432	6.6179e-07	1.27225e-06	Up	NA	GO:0016701//oxidoreductase activity, acting on single donors with incorporation of molecular oxygen;GO:0003824//catalytic activity;GO:0000907//sulfonate dioxygenase activity;GO:0016491//oxidoreductase activity	GO:0008152//metabolic process;GO:0055114//oxidation-reduction process	K19245//sulfonate dioxygenase [EC:1.14.11.-]	gi|345570064|gb|EGX52889.1|//hypothetical protein AOL_s00007g225 [Arthrobotrys oligospora ATCC 24927]
AOL_s00083g334	2016	0.01	2.97	8.21432	5.43074e-10	1.21116e-09	Up	NA	NA	NA	K10380//ankyrin;K15503//serine/threonine-protein phosphatase 6 regulatory ankyrin repeat subunit B	gi|345564564|gb|EGX47525.1|//hypothetical protein AOL_s00083g334 [Arthrobotrys oligospora ATCC 24927]
AOL_s00006g174	2238	0.01	2.93	8.19476	6.44318e-11	1.49083e-10	Up	NA	NA	NA	NA	gi|345570487|gb|EGX53308.1|//hypothetical protein AOL_s00006g174 [Arthrobotrys oligospora ATCC 24927]
AOL_s00140g64	1809	0.01	2.89	8.17493	9.31544e-09	1.96915e-08	Up	NA	NA	NA	K01293//Gly-Xaa carboxypeptidase [EC:3.4.17.4]	gi|345562712|gb|EGX45748.1|//hypothetical protein AOL_s00140g64 [Arthrobotrys oligospora ATCC 24927]
AOL_s00215g807	1302	0.01	2.88	8.16993	2.7409e-06	5.11006e-06	Up	NA	NA	NA	NA	gi|345559890|gb|EGX43021.1|//hypothetical protein AOL_s00215g807 [Arthrobotrys oligospora ATCC 24927]
AOL_s00140g83	894	0.01	2.88	8.16993	0.00019472	0.000321714	Up	NA	NA	NA	NA	gi|345562731|gb|EGX45767.1|//hypothetical protein AOL_s00140g83 [Arthrobotrys oligospora ATCC 24927]
AOL_s00097g514	966	0.01	2.86	8.15987	9.56806e-05	0.000162135	Up	NA	NA	NA	K11215//transcription factor STE12;K09467//zinc-finger protein CreA/MIG	gi|345563624|gb|EGX46610.1|//hypothetical protein AOL_s00097g514 [Arthrobotrys oligospora ATCC 24927]
AOL_s00083g68	900	0.01	2.86	8.15987	0.00019472	0.000321429	Up	NA	NA	NA	NA	gi|345564600|gb|EGX47560.1|//hypothetical protein AOL_s00083g68 [Arthrobotrys oligospora ATCC 24927]
AOL_s00078g495	1654	0.15	42.85	8.15819	0	0	Up	NA	NA	NA	K08293//sporulation-specific mitogen-activated protein kinase SMK1&#160; [EC:2.7.11.24];K11227//mitogen-activated protein kinase kinase [EC:2.7.12.2];K04371//mitogen-activated protein kinase 1/3 [EC:2.7.11.24];K06655//negative regulator of the PHO system [EC:2.7.11.22];K00916//CTD kinase subunit alpha [EC:2.7.11.22 2.7.11.23];K04563//cyclin-dependent kinase [EC:2.7.11.22]	gi|345566519|gb|EGX49462.1|//hypothetical protein AOL_s00078g495 [Arthrobotrys oligospora ATCC 24927]
AOL_s00007g226	1980	0.01	2.83	8.14466	2.24922e-09	4.88073e-09	Up	NA	NA	NA	NA	gi|345570065|gb|EGX52890.1|//hypothetical protein AOL_s00007g226 [Arthrobotrys oligospora ATCC 24927]
AOL_s00076g101	1449	0.01	2.82	8.13955	6.6179e-07	1.27252e-06	Up	NA	NA	NA	NA	gi|345567405|gb|EGX50337.1|//hypothetical protein AOL_s00076g101 [Arthrobotrys oligospora ATCC 24927]
AOL_s00097g194	873	0.27	75.45	8.12642	5.67982e-89	4.7138e-88	Up	NA	NA	NA	NA	gi|345564167|gb|EGX47148.1|//hypothetical protein AOL_s00097g194 [Arthrobotrys oligospora ATCC 24927]
AOL_s00043g219	3532	0.07	19.54	8.12486	2.92376e-101	2.6689e-100	Up	NA	NA	NA	K10380//ankyrin;K08803//death-associated protein kinase [EC:2.7.11.1]	gi|345569564|gb|EGX52430.1|//hypothetical protein AOL_s00043g219 [Arthrobotrys oligospora ATCC 24927]
AOL_s00054g162	621	1.06	294.91	8.12007	4.41986e-242	9.23612e-241	Up	NA	NA	NA	NA	gi|345568570|gb|EGX51463.1|//hypothetical protein AOL_s00054g162 [Arthrobotrys oligospora ATCC 24927]
AOL_s00193g123	2013	0.01	2.78	8.11894	2.24922e-09	4.88984e-09	Up	NA	NA	NA	NA	gi|345561299|gb|EGX44395.1|//hypothetical protein AOL_s00193g123 [Arthrobotrys oligospora ATCC 24927]
AOL_s00083g29	764	1.05	291.76	8.11825	4.3486e-277	1.01832e-275	Up	NA	NA	NA	NA	gi|345564858|gb|EGX47817.1|//hypothetical protein AOL_s00083g29 [Arthrobotrys oligospora ATCC 24927]
AOL_s00215g151	889	0.01	2.73	8.09276	9.56806e-05	0.000162165	Up	NA	NA	NA	NA	gi|345560290|gb|EGX43415.1|//hypothetical protein AOL_s00215g151 [Arthrobotrys oligospora ATCC 24927]
AOL_s00097g253	995	0.01	2.73	8.09276	4.70152e-05	8.12049e-05	Up	NA	NA	NA	NA	gi|345563844|gb|EGX46827.1|//hypothetical protein AOL_s00097g253 [Arthrobotrys oligospora ATCC 24927]
AOL_s00043g67	1066	0.19	51.84	8.09192	2.14042e-72	1.50898e-71	Up	NA	NA	NA	NA	gi|345569412|gb|EGX52278.1|//hypothetical protein AOL_s00043g67 [Arthrobotrys oligospora ATCC 24927]
AOL_s00110g303	2070	0.01	2.7	8.07682	2.24922e-09	4.88642e-09	Up	NA	NA	NA	NA	gi|345563135|gb|EGX46139.1|//hypothetical protein AOL_s00110g303 [Arthrobotrys oligospora ATCC 24927]
AOL_s00140g68	1179	0.01	2.64	8.04439	2.3102e-05	4.07322e-05	Up	NA	NA	NA	NA	gi|345562716|gb|EGX45752.1|//hypothetical protein AOL_s00140g68 [Arthrobotrys oligospora ATCC 24927]
AOL_s00043g780	1626	0.12	31.62	8.04166	5.34354e-77	3.94626e-76	Up	NA	NA	NA	NA	gi|345568891|gb|EGX51761.1|//hypothetical protein AOL_s00043g780 [Arthrobotrys oligospora ATCC 24927]
AOL_s00110g230	897	0.01	2.63	8.03892	0.000396274	0.000642197	Up	NA	NA	NA	NA	gi|345563062|gb|EGX46066.1|//hypothetical protein AOL_s00110g230 [Arthrobotrys oligospora ATCC 24927]
AOL_s00006g213	1490	0.01	2.62	8.03342	1.89579e-08	3.9492e-08	Up	NA	NA	NA	NA	gi|345570526|gb|EGX53347.1|//hypothetical protein AOL_s00006g213 [Arthrobotrys oligospora ATCC 24927]
AOL_s00170g55	1419	0.01	2.59	8.01681	2.7409e-06	5.1121e-06	Up	NA	NA	NA	K16066//3-hydroxy acid dehydrogenase / malonic semialdehyde reductase [EC:1.1.1.381 1.1.1.-];K00540;K06123//1-acylglycerone phosphate reductase [EC:1.1.1.101];K10251//17beta-estradiol 17-dehydrogenase / very-long-chain 3-oxoacyl-CoA reductase [EC:1.1.1.62 1.1.1.330]	gi|345562279|gb|EGX45348.1|//hypothetical protein AOL_s00170g55 [Arthrobotrys oligospora ATCC 24927]
AOL_s00088g40	376	0.16	41.39	8.01507	1.80585e-101	1.65655e-100	Up	NA	NA	NA	NA	gi|345564357|gb|EGX47325.1|//hypothetical protein AOL_s00088g40 [Arthrobotrys oligospora ATCC 24927]
AOL_s00043g399	1329	0.31	79.42	8.00109	1.80206e-217	3.35903e-216	Up	NA	GO:0016811//hydrolase activity, acting on carbon-nitrogen (but not peptide) bonds, in linear amides;GO:0016810//hydrolase activity, acting on carbon-nitrogen (but not peptide) bonds	NA	K01455//formamidase [EC:3.5.1.49]	gi|345569141|gb|EGX52009.1|//hypothetical protein AOL_s00043g399 [Arthrobotrys oligospora ATCC 24927];gi|700493598|gb|KGO77401.1|//Acetamidase/Formamidase [Penicillium italicum]
AOL_s00054g671	1282	0.01	2.56	8	1.59789e-07	3.17535e-07	Up	NA	NA	NA	NA	gi|345568034|gb|EGX50935.1|//hypothetical protein AOL_s00054g671 [Arthrobotrys oligospora ATCC 24927]
AOL_s00076g472	450	0.01	2.52	7.97728	0.00019472	0.000322171	Up	NA	NA	NA	NA	gi|345567049|gb|EGX49986.1|//hypothetical protein AOL_s00076g472 [Arthrobotrys oligospora ATCC 24927]
AOL_s00169g93	684	0.01	2.51	7.97154	7.85166e-08	1.58736e-07	Up	NA	NA	NA	NA	gi|345562419|gb|EGX45487.1|//hypothetical protein AOL_s00169g93 [Arthrobotrys oligospora ATCC 24927]
AOL_s00004g67	1246	0.01	2.49	7.96	2.3102e-05	4.0663e-05	Up	NA	NA	NA	NA	gi|345571220|gb|EGX54034.1|//hypothetical protein AOL_s00004g67 [Arthrobotrys oligospora ATCC 24927]
AOL_s00140g92	1096	0.01	2.48	7.9542	9.56806e-05	0.000162076	Up	GO:0016020//membrane	NA	NA	NA	gi|345562740|gb|EGX45776.1|//hypothetical protein AOL_s00140g92 [Arthrobotrys oligospora ATCC 24927]
AOL_s00078g494	3109	0.24	59.21	7.94666	3.75244e-281	8.96737e-280	Up	NA	NA	NA	NA	gi|345566518|gb|EGX49461.1|//hypothetical protein AOL_s00078g494 [Arthrobotrys oligospora ATCC 24927]
AOL_s00043g180	1301	0.08	19.08	7.89785	4.08264e-64	2.60083e-63	Up	NA	NA	NA	NA	gi|345569525|gb|EGX52391.1|//hypothetical protein AOL_s00043g180 [Arthrobotrys oligospora ATCC 24927]
AOL_s00210g215	988	0.01	2.35	7.87652	0.000396274	0.000642979	Up	NA	NA	NA	NA	gi|345560937|gb|EGX44054.1|//hypothetical protein AOL_s00210g215 [Arthrobotrys oligospora ATCC 24927]
AOL_s00110g326	3286	0.01	2.32	7.85798	1.07603e-13	2.73856e-13	Up	NA	NA	NA	NA	gi|345563158|gb|EGX46162.1|//hypothetical protein AOL_s00110g326 [Arthrobotrys oligospora ATCC 24927]
AOL_s00210g193	1656	0.01	2.32	7.85798	1.34681e-06	2.55491e-06	Up	NA	NA	NA	K15110//solute carrier family 25 (mitochondrial 2-oxodicarboxylate transporter), member 21;K02155//V-type H+-transporting ATPase 16kDa proteolipid subunit;K00777	gi|345560915|gb|EGX44032.1|//hypothetical protein AOL_s00210g193 [Arthrobotrys oligospora ATCC 24927]
AOL_s00007g297	1916	0.01	2.3	7.84549	1.59789e-07	3.17806e-07	Up	NA	NA	GO:0006810//transport	K01952//phosphoribosylformylglycinamidine synthase [EC:6.3.5.3];K08197//MFS transporter, SIT family, siderophore-iron:H+ symporter;K08165//MFS transporter, DHA2 family, multidrug resistance protein;K13095//splicing factor 1;K10866//DNA repair protein RAD50 [EC:3.6.-.-];K14708//solute carrier family 26 (sodium-independent sulfate anion transporter), member 11	gi|345570136|gb|EGX52961.1|//hypothetical protein AOL_s00007g297 [Arthrobotrys oligospora ATCC 24927]
AOL_s00043g394	1284	0.01	2.25	7.81378	4.70152e-05	8.11748e-05	Up	NA	NA	NA	NA	gi|345569384|gb|EGX52251.1|//hypothetical protein AOL_s00043g394 [Arthrobotrys oligospora ATCC 24927]
BGI_novel_G000010	1130	0.01	2.22	7.79442	0.00019472	0.0003216	Up	GO:0016020//membrane	NA	GO:0044699//single-organism process;GO:0008152//metabolic process	K00412//ubiquinol-cytochrome c reductase cytochrome b subunit	gi|646223723|emb|CDL73547.1|//LAGLIDADG endonuclease n1 TaxGibberella zeae PH-1 RepIDA5J050_GIBZE [Fusarium culmorum CS7071]
AOL_s00007g427	2135	0.1	22.13	7.78986	3.87842e-83	3.0478e-82	Up	NA	NA	NA	K10380//ankyrin;K00102//D-lactate dehydrogenase (cytochrome) [EC:1.1.2.4];K06867//uncharacterized protein;K08803//death-associated protein kinase [EC:2.7.11.1]	gi|345569818|gb|EGX52644.1|//hypothetical protein AOL_s00007g427 [Arthrobotrys oligospora ATCC 24927]
AOL_s00075g26	488	0.01	2.21	7.7879	5.578e-06	1.01935e-05	Up	NA	NA	NA	NA	gi|345567672|gb|EGX50600.1|//hypothetical protein AOL_s00075g26 [Arthrobotrys oligospora ATCC 24927]
AOL_s00076g542	695	3.91	857.48	7.77679	0	0	Up	NA	NA	NA	NA	gi|345566963|gb|EGX49901.1|//hypothetical protein AOL_s00076g542 [Arthrobotrys oligospora ATCC 24927]
AOL_s00176g33	2007	0.01	2.19	7.77479	1.59789e-07	3.1767e-07	Up	NA	NA	NA	NA	gi|345561787|gb|EGX44862.1|//hypothetical protein AOL_s00176g33 [Arthrobotrys oligospora ATCC 24927]
AOL_s00088g9	1184	0.5	109.48	7.77452	3.60238e-186	5.77869e-185	Up	NA	NA	NA	K08818//cell division cycle 2-like [EC:2.7.11.22]	gi|345564326|gb|EGX47294.1|//hypothetical protein AOL_s00088g9 [Arthrobotrys oligospora ATCC 24927]
AOL_s00043g166	865	0.15	32.7	7.76818	2.15808e-127	2.42037e-126	Up	NA	NA	NA	NA	gi|345569511|gb|EGX52377.1|//hypothetical protein AOL_s00043g166 [Arthrobotrys oligospora ATCC 24927]
AOL_s00006g575	360	0.01	2.17	7.76155	0.00019472	0.000321771	Up	NA	NA	NA	NA	gi|345570374|gb|EGX53197.1|//hypothetical protein AOL_s00006g575 [Arthrobotrys oligospora ATCC 24927]
AOL_s00215g14	4372	0.13	27.74	7.73731	1.06121e-128	1.20322e-127	Up	NA	NA	NA	K17656//mitochondrial splicing suppressor protein 51	gi|345560153|gb|EGX43278.1|//hypothetical protein AOL_s00215g14 [Arthrobotrys oligospora ATCC 24927]
AOL_s00004g409	1818	0.01	2.1	7.71425	1.34681e-06	2.55543e-06	Up	NA	NA	NA	NA	gi|345570935|gb|EGX53750.1|//hypothetical protein AOL_s00004g409 [Arthrobotrys oligospora ATCC 24927]
AOL_s00169g221	1932	0.01	2.07	7.69349	6.6179e-07	1.27357e-06	Up	NA	NA	NA	K00505//tyrosinase [EC:1.14.18.1]	gi|345562547|gb|EGX45615.1|//hypothetical protein AOL_s00169g221 [Arthrobotrys oligospora ATCC 24927]
AOL_s00076g376	1116	0.01	2.06	7.6865	0.000396274	0.000642308	Up	NA	NA	NA	NA	gi|345567089|gb|EGX50025.1|//hypothetical protein AOL_s00076g376 [Arthrobotrys oligospora ATCC 24927]
AOL_s00088g41	1398	0.01	2.05	7.67948	4.70152e-05	8.13406e-05	Up	NA	NA	NA	NA	gi|345564358|gb|EGX47326.1|//hypothetical protein AOL_s00088g41 [Arthrobotrys oligospora ATCC 24927]
AOL_s00173g251	456	0.52	106.48	7.67786	7.97814e-60	4.8409e-59	Up	NA	NA	NA	NA	gi|345562078|gb|EGX45150.1|//hypothetical protein AOL_s00173g251 [Arthrobotrys oligospora ATCC 24927]
AOL_s00210g204	1757	0.78	159.56	7.67641	0	0	Up	NA	NA	NA	K01845//glutamate-1-semialdehyde 2,1-aminomutase [EC:5.4.3.8]	gi|345560926|gb|EGX44043.1|//hypothetical protein AOL_s00210g204 [Arthrobotrys oligospora ATCC 24927]
AOL_s00081g13	1897	0.01	2.04	7.67243	0.00019472	0.000322056	Up	NA	GO:0016787//hydrolase activity	NA	K01279//tripeptidyl-peptidase I [EC:3.4.14.9]	gi|345565198|gb|EGX48150.1|//hypothetical protein AOL_s00081g13 [Arthrobotrys oligospora ATCC 24927]
AOL_s00079g459	3946	0.01	2.02	7.65821	4.45654e-13	1.11264e-12	Up	NA	NA	NA	K15110//solute carrier family 25 (mitochondrial 2-oxodicarboxylate transporter), member 21;K16261//yeast amino acid transporter;K02155//V-type H+-transporting ATPase 16kDa proteolipid subunit;K00777	gi|345565872|gb|EGX48820.1|//hypothetical protein AOL_s00079g459 [Arthrobotrys oligospora ATCC 24927]
AOL_s00188g235	2406	0.01	1.98	7.62936	3.85812e-08	7.92718e-08	Up	NA	NA	NA	NA	gi|345561478|gb|EGX44567.1|//hypothetical protein AOL_s00188g235 [Arthrobotrys oligospora ATCC 24927]
AOL_s00097g82	4365	0.11	21.75	7.62737	1.84236e-172	2.7212e-171	Up	NA	NA	NA	NA	gi|345564055|gb|EGX47036.1|//hypothetical protein AOL_s00097g82 [Arthrobotrys oligospora ATCC 24927]
AOL_s00078g366	1181	0.16	31.62	7.62662	5.27116e-54	2.97741e-53	Up	NA	NA	NA	NA	gi|345566390|gb|EGX49333.1|//hypothetical protein AOL_s00078g366 [Arthrobotrys oligospora ATCC 24927]
AOL_s00078g422	1380	0.01	1.93	7.59246	9.56806e-05	0.000162017	Up	NA	NA	NA	NA	gi|345566446|gb|EGX49389.1|//hypothetical protein AOL_s00078g422 [Arthrobotrys oligospora ATCC 24927]
AOL_s00188g150	1324	0.01	1.93	7.59246	9.56806e-05	0.000161988	Up	NA	NA	NA	NA	gi|345561393|gb|EGX44482.1|//hypothetical protein AOL_s00188g150 [Arthrobotrys oligospora ATCC 24927]
AOL_s00076g469	1042	0.2	38.5	7.58871	2.35708e-46	1.20109e-45	Up	NA	NA	NA	NA	gi|345567182|gb|EGX50118.1|//hypothetical protein AOL_s00076g469 [Arthrobotrys oligospora ATCC 24927]
AOL_s00043g377	2210	0.32	61.52	7.58684	2.2916e-239	4.74616e-238	Up	NA	GO:0060089//molecular transducer activity	GO:0023052//signaling	NA	gi|345569367|gb|EGX52234.1|//hypothetical protein AOL_s00043g377 [Arthrobotrys oligospora ATCC 24927]
AOL_s00004g370	1302	0.01	1.9	7.56986	0.00019472	0.000322457	Up	NA	NA	NA	NA	gi|345571523|gb|EGX54337.1|//hypothetical protein AOL_s00004g370 [Arthrobotrys oligospora ATCC 24927]
AOL_s00097g74	1206	0.01	1.89	7.56224	0.000396274	0.000643091	Up	NA	NA	NA	NA	gi|345564047|gb|EGX47028.1|//hypothetical protein AOL_s00097g74 [Arthrobotrys oligospora ATCC 24927]
AOL_s00097g276	2175	0.01	1.89	7.56224	1.59789e-07	3.17264e-07	Up	NA	GO:0004553//hydrolase activity, hydrolyzing O-glycosyl compounds;GO:0016787//hydrolase activity;GO:0030247//polysaccharide binding;GO:0003824//catalytic activity;GO:0005488//binding;GO:0043167//ion binding;GO:0016798//hydrolase activity, acting on glycosyl bonds	GO:0008152//metabolic process;GO:0044238//primary metabolic process	K19355//mannan endo-1,4-beta-mannosidase [EC:3.2.1.78]	gi|345563867|gb|EGX46850.1|//hypothetical protein AOL_s00097g276 [Arthrobotrys oligospora ATCC 24927]
AOL_s00080g315	1318	0.01	1.88	7.55459	1.34681e-06	2.55231e-06	Up	NA	NA	NA	K06005//candidapepsin [EC:3.4.23.24]	gi|345565395|gb|EGX48345.1|//hypothetical protein AOL_s00080g315 [Arthrobotrys oligospora ATCC 24927]
AOL_s00080g319	1946	0.01	1.85	7.53138	2.7409e-06	5.11415e-06	Up	NA	NA	NA	NA	gi|345565399|gb|EGX48349.1|//hypothetical protein AOL_s00080g319 [Arthrobotrys oligospora ATCC 24927]
AOL_s00110g149	3874	0.12	22.09	7.52422	1.28033e-118	1.33625e-117	Up	NA	GO:0005488//binding	NA	K01279//tripeptidyl-peptidase I [EC:3.4.14.9];K16261//yeast amino acid transporter;K00777;K14855//ribosome assembly protein 4	gi|345563322|gb|EGX46325.1|//hypothetical protein AOL_s00110g149 [Arthrobotrys oligospora ATCC 24927]
AOL_s00215g926	1036	0.01	1.84	7.52356	0.00019472	0.000321486	Up	GO:0044464//cell part	GO:0022892//substrate-specific transporter activity;GO:0046914//transition metal ion binding;GO:0016740//transferase activity;GO:0016747//transferase activity, transferring acyl groups other than amino-acyl groups;GO:0003824//catalytic activity;GO:0005488//binding	GO:0006810//transport;GO:0008152//metabolic process	K15418//zearalenone synthase, highly reducing iterative type I polyketide synthase;K15384//aspyridone synthetase, hybrid polyketide synthase / nonribosomal peptide synthetase;K15419//emericellamide biosynthesis, highly reducing iterative type I polyketide synthase;K09540//translocation protein SEC63;K15391//cyclopiazonic acid synthetase, hybrid polyketide synthase / nonribosomal peptide synthetas…	gi|345559845|gb|EGX42977.1|//hypothetical protein AOL_s00215g926 [Arthrobotrys oligospora ATCC 24927]
AOL_s00210g79	1465	0.01	1.81	7.49985	9.56806e-05	0.000161723	Up	NA	NA	NA	K08803//death-associated protein kinase [EC:2.7.11.1];K16261//yeast amino acid transporter;K14855//ribosome assembly protein 4	gi|345561092|gb|EGX44207.1|//hypothetical protein AOL_s00210g79 [Arthrobotrys oligospora ATCC 24927]
AOL_s00210g318	1149	0.01	1.79	7.48382	3.85812e-08	7.93768e-08	Up	NA	NA	NA	NA	gi|345560752|gb|EGX43871.1|//hypothetical protein AOL_s00210g318 [Arthrobotrys oligospora ATCC 24927]
AOL_s00004g244	497	0.01	1.78	7.47573	9.56806e-05	0.000162047	Up	NA	GO:0030247//polysaccharide binding;GO:0003824//catalytic activity;GO:0016798//hydrolase activity, acting on glycosyl bonds	GO:0044238//primary metabolic process	K18578//xyloglucan-specific exo-beta-1,4-glucanase [EC:3.2.1.155]	gi|345571397|gb|EGX54211.1|//hypothetical protein AOL_s00004g244 [Arthrobotrys oligospora ATCC 24927]
AOL_s00081g236	1069	0.01	1.77	7.46761	0.00019472	0.000321828	Up	NA	NA	NA	K11244//cell wall integrity and stress response component	gi|345564953|gb|EGX47909.1|//hypothetical protein AOL_s00081g236 [Arthrobotrys oligospora ATCC 24927]
AOL_s00110g240	958	0.21	37.05	7.46294	2.48492e-50	1.33715e-49	Up	NA	NA	NA	NA	gi|345563072|gb|EGX46076.1|//hypothetical protein AOL_s00110g240 [Arthrobotrys oligospora ATCC 24927]
AOL_s00088g16	1821	0.53	93.36	7.46067	1.07378e-250	2.3006e-249	Up	NA	NA	NA	K00521//ferric-chelate reductase [EC:1.16.1.7]	gi|345564333|gb|EGX47301.1|//hypothetical protein AOL_s00088g16 [Arthrobotrys oligospora ATCC 24927]
AOL_s00007g60	1610	0.01	1.76	7.45943	4.70152e-05	8.13255e-05	Up	NA	NA	NA	NA	gi|345570287|gb|EGX53111.1|//hypothetical protein AOL_s00007g60 [Arthrobotrys oligospora ATCC 24927]
AOL_s00188g258	1612	0.05	8.78	7.45615	1.9195e-34	7.951e-34	Up	NA	NA	NA	NA	gi|345561501|gb|EGX44590.1|//hypothetical protein AOL_s00188g258 [Arthrobotrys oligospora ATCC 24927]
AOL_s00097g380	1302	0.01	1.74	7.44294	0.000396274	0.000642644	Up	NA	NA	NA	NA	gi|345563971|gb|EGX46954.1|//hypothetical protein AOL_s00097g380 [Arthrobotrys oligospora ATCC 24927]
AOL_s00004g636	1779	0.01	1.71	7.41785	3.85812e-08	7.93943e-08	Up	NA	NA	NA	K06674//structural maintenance of chromosome 2;K06669//structural maintenance of chromosome 3 (chondroitin sulfate proteoglycan 6);K06636//structural maintenance of chromosome 1;K12614//ATP-dependent RNA helicase DDX6/DHH1 [EC:3.6.4.13]	gi|345571162|gb|EGX53977.1|//hypothetical protein AOL_s00004g636 [Arthrobotrys oligospora ATCC 24927]
AOL_s00083g93	1765	0.01	1.71	7.41785	2.3102e-05	4.064e-05	Up	NA	NA	NA	K00108//choline dehydrogenase [EC:1.1.99.1];K01908//propionyl-CoA synthetase [EC:6.2.1.17]	gi|345564625|gb|EGX47585.1|//hypothetical protein AOL_s00083g93 [Arthrobotrys oligospora ATCC 24927]
AOL_s00007g263	785	0.27	46.16	7.41754	6.807e-90	5.70515e-89	Up	NA	NA	NA	NA	gi|345570102|gb|EGX52927.1|//hypothetical protein AOL_s00007g263 [Arthrobotrys oligospora ATCC 24927]
AOL_s00081g83	637	0.6	101.53	7.40273	1.62601e-86	1.32353e-85	Up	NA	NA	NA	NA	gi|345565134|gb|EGX48087.1|//hypothetical protein AOL_s00081g83 [Arthrobotrys oligospora ATCC 24927]
AOL_s00076g425	2966	0.47	78.59	7.38554	0	0	Up	NA	NA	NA	NA	gi|345567138|gb|EGX50074.1|//hypothetical protein AOL_s00076g425 [Arthrobotrys oligospora ATCC 24927]
AOL_s00043g726	1206	0.2	33.41	7.38414	1.11189e-55	6.40077e-55	Up	NA	GO:0003824//catalytic activity	NA	K00819//ornithine--oxo-acid transaminase [EC:2.6.1.13];K10590//E3 ubiquitin-protein ligase TRIP12 [EC:2.3.2.26];K00818//acetylornithine aminotransferase [EC:2.6.1.11];K00823//4-aminobutyrate aminotransferase [EC:2.6.1.19]	gi|345569123|gb|EGX51992.1|//hypothetical protein AOL_s00043g726 [Arthrobotrys oligospora ATCC 24927]
AOL_s00079g369	1823	0.13	21.52	7.37102	3.14054e-55	1.79901e-54	Up	NA	NA	NA	K15198//transcription factor TFIIIB component B'';K11294//nucleolin	gi|345565782|gb|EGX48730.1|//hypothetical protein AOL_s00079g369 [Arthrobotrys oligospora ATCC 24927]
AOL_s00215g19	578	0.13	21.34	7.3589	6.27306e-15	1.66046e-14	Up	NA	NA	NA	K10295//F-box protein 9	gi|345560158|gb|EGX43283.1|//hypothetical protein AOL_s00215g19 [Arthrobotrys oligospora ATCC 24927]
AOL_s00110g293	1620	0.01	1.64	7.35755	0.000396274	0.000643427	Up	NA	GO:0016798//hydrolase activity, acting on glycosyl bonds	GO:0005975//carbohydrate metabolic process	K19357//cellulase [EC:3.2.1.4]	gi|345563125|gb|EGX46129.1|//hypothetical protein AOL_s00110g293 [Arthrobotrys oligospora ATCC 24927]
AOL_s00169g143	1630	0.27	44.14	7.35298	7.0257e-97	6.21248e-96	Up	NA	NA	NA	NA	gi|345562469|gb|EGX45537.1|//hypothetical protein AOL_s00169g143 [Arthrobotrys oligospora ATCC 24927]
AOL_s00215g429	2256	0.71	115.63	7.34748	0	0	Up	NA	NA	NA	NA	gi|345560568|gb|EGX43693.1|//hypothetical protein AOL_s00215g429 [Arthrobotrys oligospora ATCC 24927]
AOL_s00140g82	571	0.01	1.62	7.33985	0.00019472	0.000322285	Up	NA	NA	NA	NA	gi|345562730|gb|EGX45766.1|//hypothetical protein AOL_s00140g82 [Arthrobotrys oligospora ATCC 24927]
AOL_s00043g334	913	0.23	37.23	7.33869	6.96728e-48	3.63171e-47	Up	NA	NA	NA	NA	gi|345569324|gb|EGX52191.1|//hypothetical protein AOL_s00043g334 [Arthrobotrys oligospora ATCC 24927]
AOL_s00112g49	1606	0.01	1.61	7.33092	3.25188e-07	6.37382e-07	Up	NA	NA	NA	NA	gi|345562964|gb|EGX45971.1|//hypothetical protein AOL_s00112g49 [Arthrobotrys oligospora ATCC 24927]
AOL_s00210g299	643	0.33	52.47	7.31288	1.45073e-48	7.63457e-48	Up	NA	GO:0046872//metal ion binding	NA	K00517;K16261//yeast amino acid transporter	gi|345560733|gb|EGX43852.1|//hypothetical protein AOL_s00210g299 [Arthrobotrys oligospora ATCC 24927]
AOL_s00054g218	2610	0.01	1.59	7.31288	3.25188e-07	6.36312e-07	Up	NA	NA	NA	NA	gi|345568626|gb|EGX51519.1|//hypothetical protein AOL_s00054g218 [Arthrobotrys oligospora ATCC 24927]
AOL_s00079g193	1447	0.01	1.59	7.31288	4.70152e-05	8.122e-05	Up	NA	NA	NA	NA	gi|345566025|gb|EGX48972.1|//hypothetical protein AOL_s00079g193 [Arthrobotrys oligospora ATCC 24927]
AOL_s00007g181	1498	0.01	1.59	7.31288	0.000396274	0.000642085	Up	NA	NA	NA	NA	gi|345570020|gb|EGX52845.1|//hypothetical protein AOL_s00007g181 [Arthrobotrys oligospora ATCC 24927]
AOL_s00007g41	2624	0.01	1.58	7.30378	3.25188e-07	6.37516e-07	Up	NA	NA	NA	K12821//pre-mRNA-processing factor 40;K06631//polo-like kinase 1 [EC:2.7.11.21]	gi|345570268|gb|EGX53092.1|//hypothetical protein AOL_s00007g41 [Arthrobotrys oligospora ATCC 24927]
AOL_s00078g304	2667	0.01	1.55	7.27612	3.25188e-07	6.37114e-07	Up	NA	NA	NA	K00924;K05462//ephrin-A;K04508//transducin (beta)-like 1;K06641//serine/threonine-protein kinase Chk2 [EC:2.7.11.1];K05103//Eph receptor A2 [EC:2.7.10.1];K05743//LIM domain kinase 1 [EC:2.7.11.1]	gi|345566328|gb|EGX49271.1|//hypothetical protein AOL_s00078g304 [Arthrobotrys oligospora ATCC 24927]
AOL_s00043g302	1750	0.22	34.07	7.27485	5.19282e-88	4.28672e-87	Up	NA	NA	NA	K01104//protein-tyrosine phosphatase [EC:3.1.3.48]	gi|345569292|gb|EGX52159.1|//hypothetical protein AOL_s00043g302 [Arthrobotrys oligospora ATCC 24927]
AOL_s00210g163	1133	1.12	172.78	7.26929	0	0	Up	NA	GO:0008940//nitrate reductase activity;GO:0005506//iron ion binding;GO:0046914//transition metal ion binding;GO:0016491//oxidoreductase activity;GO:0050662//coenzyme binding	GO:0008152//metabolic process;GO:0042126//nitrate metabolic process	K10534//nitrate reductase (NAD(P)H) [EC:1.7.1.1 1.7.1.2 1.7.1.3]	gi|345560885|gb|EGX44002.1|//hypothetical protein AOL_s00210g163 [Arthrobotrys oligospora ATCC 24927]
AOL_s00210g374	1326	0.6	90.39	7.23506	4.0553e-172	5.98028e-171	Up	NA	NA	NA	K00960//DNA-directed RNA polymerase [EC:2.7.7.6]	gi|345560808|gb|EGX43927.1|//hypothetical protein AOL_s00210g374 [Arthrobotrys oligospora ATCC 24927]
AOL_s00004g470	1632	0.01	1.5	7.22882	0.00019472	0.000322399	Up	NA	GO:0003824//catalytic activity	GO:0008152//metabolic process	K00118//glucose-fructose oxidoreductase [EC:1.1.99.28];K00010//myo-inositol 2-dehydrogenase / D-chiro-inositol 1-dehydrogenase [EC:1.1.1.18 1.1.1.369]	gi|345570996|gb|EGX53811.1|//hypothetical protein AOL_s00004g470 [Arthrobotrys oligospora ATCC 24927]
AOL_s00215g147	1063	0.38	55.47	7.18956	9.86336e-84	7.78379e-83	Up	NA	NA	NA	NA	gi|345560286|gb|EGX43411.1|//hypothetical protein AOL_s00215g147 [Arthrobotrys oligospora ATCC 24927]
AOL_s00117g38	1095	0.37	53.91	7.18688	9.86336e-84	7.79038e-83	Up	NA	NA	NA	K00545//catechol O-methyltransferase [EC:2.1.1.6]	gi|345562820|gb|EGX45833.1|//hypothetical protein AOL_s00117g38 [Arthrobotrys oligospora ATCC 24927]
AOL_s00193g186	2061	0.01	1.45	7.17991	2.3102e-05	4.07091e-05	Up	NA	NA	NA	NA	gi|345561177|gb|EGX44274.1|//hypothetical protein AOL_s00193g186 [Arthrobotrys oligospora ATCC 24927]
AOL_s00054g54	2478	0.32	45.43	7.14943	6.5856e-110	6.41356e-109	Up	NA	GO:0004121//cystathionine beta-lyase activity;GO:0016846//carbon-sulfur lyase activity;GO:0048037//cofactor binding;GO:0030170//pyridoxal phosphate binding	GO:0071265//L-methionine biosynthetic process;GO:0071266//'de novo' L-methionine biosynthetic process	K01760//cystathionine beta-lyase [EC:4.4.1.8]	gi|345568763|gb|EGX51655.1|//hypothetical protein AOL_s00054g54 [Arthrobotrys oligospora ATCC 24927]
AOL_s00076g180	1710	0.11	15.46	7.13489	2.51794e-39	1.14029e-38	Up	NA	NA	NA	NA	gi|345567484|gb|EGX50416.1|//hypothetical protein AOL_s00076g180 [Arthrobotrys oligospora ATCC 24927]
AOL_s00173g6	2973	0.96	134.82	7.13378	1.05877e-279	2.50451e-278	Up	NA	NA	NA	K01199//glucan endo-1,3-beta-D-glucosidase [EC:3.2.1.39];K12823//ATP-dependent RNA helicase DDX5/DBP2 [EC:3.6.4.13];K02519//translation initiation factor IF-2;K14794//ribosomal RNA-processing protein 12;K11294//nucleolin	gi|345561833|gb|EGX44905.1|//hypothetical protein AOL_s00173g6 [Arthrobotrys oligospora ATCC 24927]
AOL_s00076g566	1198	0.46	63.96	7.11939	3.56078e-234	7.12156e-233	Up	NA	NA	NA	K01210//glucan 1,3-beta-glucosidase [EC:3.2.1.58]	gi|345566987|gb|EGX49925.1|//hypothetical protein AOL_s00076g566 [Arthrobotrys oligospora ATCC 24927]
AOL_s00169g121	2308	0.01	1.38	7.10852	1.13518e-05	2.04245e-05	Up	NA	NA	NA	NA	gi|345562447|gb|EGX45515.1|//hypothetical protein AOL_s00169g121 [Arthrobotrys oligospora ATCC 24927]
AOL_s00043g371	2469	0.01	1.36	7.08746	5.578e-06	1.01895e-05	Up	NA	NA	NA	NA	gi|345569361|gb|EGX52228.1|//hypothetical protein AOL_s00043g371 [Arthrobotrys oligospora ATCC 24927]
AOL_s00078g382	2953	0.06	8.11	7.0786	1.40644e-36	6.07132e-36	Up	GO:0031224//intrinsic component of membrane;GO:0016020//membrane	GO:0008493//tetracycline transporter activity	GO:0006810//transport;GO:0015850//organic hydroxy compound transport;GO:0042221//response to chemical	K01952//phosphoribosylformylglycinamidine synthase [EC:6.3.5.3];K13095//splicing factor 1;K10866//DNA repair protein RAD50 [EC:3.6.-.-];K14708//solute carrier family 26 (sodium-independent sulfate anion transporter), member 11	gi|345566406|gb|EGX49349.1|//hypothetical protein AOL_s00078g382 [Arthrobotrys oligospora ATCC 24927];gi|636753767|ref|XP_008079057.1|//MFS general substrate transporter [Glarea lozoyensis ATCC 20868]
AOL_s00078g297	2025	0.01	1.33	7.05528	0.00019472	0.000322342	Up	NA	NA	NA	NA	gi|345566321|gb|EGX49264.1|//hypothetical protein AOL_s00078g297 [Arthrobotrys oligospora ATCC 24927]
AOL_s00054g453	1686	0.01	1.32	7.04439	0.000396274	0.000642532	Up	NA	NA	NA	NA	gi|345568489|gb|EGX51383.1|//hypothetical protein AOL_s00054g453 [Arthrobotrys oligospora ATCC 24927]
AOL_s00097g122	2271	0.21	27.28	7.02131	3.57716e-91	3.03912e-90	Up	NA	NA	NA	K15110//solute carrier family 25 (mitochondrial 2-oxodicarboxylate transporter), member 21;K02155//V-type H+-transporting ATPase 16kDa proteolipid subunit;K00777	gi|345564095|gb|EGX47076.1|//hypothetical protein AOL_s00097g122 [Arthrobotrys oligospora ATCC 24927]
AOL_s00097g404	768	1.68	215.18	7.00094	0	0	Up	NA	NA	NA	K09481//protein transport protein SEC61 subunit beta	gi|345563790|gb|EGX46774.1|//hypothetical protein AOL_s00097g404 [Arthrobotrys oligospora ATCC 24927]
AOL_s00006g534	9078	0.01	1.27	6.98868	3.00106e-19	8.99642e-19	Up	NA	NA	NA	NA	gi|345570333|gb|EGX53156.1|//hypothetical protein AOL_s00006g534 [Arthrobotrys oligospora ATCC 24927]
AOL_s00076g158	2515	2.85	360.3	6.98209	0	0	Up	NA	GO:0003824//catalytic activity	NA	K01897//long-chain acyl-CoA synthetase [EC:6.2.1.3];K01895//acetyl-CoA synthetase [EC:6.2.1.1];K17806//mitochondrial import inner membrane translocase subunit TIM23;K01904//4-coumarate--CoA ligase [EC:6.2.1.12];K14818//ribosome assembly protein SQT1	gi|345567462|gb|EGX50394.1|//hypothetical protein AOL_s00076g158 [Arthrobotrys oligospora ATCC 24927]
AOL_s00079g116	1248	0.16	19.87	6.95638	5.73172e-36	2.4572e-35	Up	NA	NA	NA	NA	gi|345565948|gb|EGX48895.1|//hypothetical protein AOL_s00079g116 [Arthrobotrys oligospora ATCC 24927]
BGI_novel_G000008	4416	0.01	1.24	6.9542	2.24922e-09	4.883e-09	Up	NA	NA	NA	K15110//solute carrier family 25 (mitochondrial 2-oxodicarboxylate transporter), member 21;K02155//V-type H+-transporting ATPase 16kDa proteolipid subunit;K00777	gi|667649549|ref|XP_008596606.1|//Pfs, NACHT and Ankyrin domain protein [Beauveria bassiana ARSEF 2860]
AOL_s00004g392	1464	0.11	13.25	6.91235	5.95894e-27	2.15178e-26	Up	NA	NA	NA	K18573//intermediate cleaving peptidase 55 [EC:3.4.11.26]	gi|345570918|gb|EGX53733.1|//hypothetical protein AOL_s00004g392 [Arthrobotrys oligospora ATCC 24927]
AOL_s00210g160	1805	10.13	1213.94	6.90492	0	0	Up	NA	GO:0000166//nucleotide binding;GO:0003824//catalytic activity	NA	K05894//12-oxophytodienoic acid reductase [EC:1.3.1.42];K09580//protein disulfide-isomerase A1 [EC:5.3.4.1];K00540	gi|345560882|gb|EGX43999.1|//hypothetical protein AOL_s00210g160 [Arthrobotrys oligospora ATCC 24927]
AOL_s00215g748	1522	2.84	336.18	6.8872	0	0	Up	NA	NA	NA	NA	gi|345560009|gb|EGX43139.1|//hypothetical protein AOL_s00215g748 [Arthrobotrys oligospora ATCC 24927]
AOL_s00079g437	2530	0.01	1.18	6.88264	1.59789e-07	3.17467e-07	Up	NA	NA	NA	NA	gi|345565850|gb|EGX48798.1|//hypothetical protein AOL_s00079g437 [Arthrobotrys oligospora ATCC 24927]
AOL_s00210g205	1090	0.17	20.05	6.88192	4.56832e-80	3.48704e-79	Up	NA	NA	NA	K10380//ankyrin;K15110//solute carrier family 25 (mitochondrial 2-oxodicarboxylate transporter), member 21;K01279//tripeptidyl-peptidase I [EC:3.4.14.9];K02155//V-type H+-transporting ATPase 16kDa proteolipid subunit;K16261//yeast amino acid transporter;K00777	gi|345560927|gb|EGX44044.1|//hypothetical protein AOL_s00210g205 [Arthrobotrys oligospora ATCC 24927]
AOL_s00215g820	609	0.73	86.09	6.88181	1.11211e-62	6.98912e-62	Up	NA	NA	NA	NA	gi|345559903|gb|EGX43034.1|//hypothetical protein AOL_s00215g820 [Arthrobotrys oligospora ATCC 24927]
AOL_s00076g373	1562	0.01	1.17	6.87036	0.00019472	0.000322228	Up	NA	GO:0017111//nucleoside-triphosphatase activity	NA	K05658//ATP-binding cassette, subfamily B (MDR/TAP), member 1 [EC:3.6.3.44]	gi|345567086|gb|EGX50022.1|//hypothetical protein AOL_s00076g373 [Arthrobotrys oligospora ATCC 24927]
AOL_s00006g284	2558	0.49	56.2	6.84164	0	0	Up	NA	GO:0004553//hydrolase activity, hydrolyzing O-glycosyl compounds;GO:0016787//hydrolase activity;GO:0003824//catalytic activity	NA	K01187//alpha-glucosidase [EC:3.2.1.20];K05546//alpha 1,3-glucosidase [EC:3.2.1.84]	gi|345570597|gb|EGX53418.1|//hypothetical protein AOL_s00006g284 [Arthrobotrys oligospora ATCC 24927]
AOL_s00080g195	2126	0.48	53.41	6.79793	2.17294e-173	3.21457e-172	Up	NA	NA	NA	K03021//DNA-directed RNA polymerase III subunit RPC2 [EC:2.7.7.6];K08139//MFS transporter, SP family, sugar:H+ symporter	gi|345565617|gb|EGX48566.1|//hypothetical protein AOL_s00080g195 [Arthrobotrys oligospora ATCC 24927]
AOL_s00006g503	2812	0.15	16.69	6.79788	4.83436e-110	4.713e-109	Up	NA	NA	NA	K05692//actin beta/gamma 1;K00777;K14855//ribosome assembly protein 4	gi|345570420|gb|EGX53242.1|//hypothetical protein AOL_s00006g503 [Arthrobotrys oligospora ATCC 24927]
AOL_s00078g294	638	1.22	134.65	6.78619	1.70951e-275	3.95351e-274	Up	NA	GO:0016769//transferase activity, transferring nitrogenous groups;GO:0008483//transaminase activity;GO:0048037//cofactor binding;GO:0030170//pyridoxal phosphate binding	NA	K00819//ornithine--oxo-acid transaminase [EC:2.6.1.13];K00833//adenosylmethionine---8-amino-7-oxononanoate aminotransferase [EC:2.6.1.62];K10590//E3 ubiquitin-protein ligase TRIP12 [EC:2.3.2.26];K00818//acetylornithine aminotransferase [EC:2.6.1.11]	gi|345566318|gb|EGX49261.1|//hypothetical protein AOL_s00078g294 [Arthrobotrys oligospora ATCC 24927]
AOL_s00075g79	2862	0.01	1.1	6.78136	1.13518e-05	2.04087e-05	Up	NA	NA	NA	K14997//solute carrier family 38 (sodium-coupled neutral amino acid transporter), member 11	gi|345567725|gb|EGX50653.1|//hypothetical protein AOL_s00075g79 [Arthrobotrys oligospora ATCC 24927]
AOL_s00007g462	689	0.47	51.69	6.78108	1.234e-69	8.4132e-69	Up	NA	NA	NA	NA	gi|345569853|gb|EGX52679.1|//hypothetical protein AOL_s00007g462 [Arthrobotrys oligospora ATCC 24927]
AOL_s00054g458	3484	0.09	9.75	6.75933	1.9028e-44	9.39305e-44	Up	NA	NA	NA	K16732//protein regulator of cytokinesis 1	gi|345568494|gb|EGX51388.1|//hypothetical protein AOL_s00054g458 [Arthrobotrys oligospora ATCC 24927]
AOL_s00078g558	1978	0.19	20.47	6.75137	5.83848e-130	6.6603e-129	Up	NA	NA	NA	K16261//yeast amino acid transporter;K00777	gi|345566231|gb|EGX49175.1|//hypothetical protein AOL_s00078g559 [Arthrobotrys oligospora ATCC 24927];gi|345566230|gb|EGX49174.1|//hypothetical protein AOL_s00078g558 [Arthrobotrys oligospora ATCC 24927]
AOL_s00173g242	2290	0.34	36.15	6.73232	1.80492e-121	1.94024e-120	Up	NA	NA	NA	NA	gi|345562069|gb|EGX45141.1|//hypothetical protein AOL_s00173g242 [Arthrobotrys oligospora ATCC 24927]
AOL_s00043g258	2415	0.24	25.25	6.71711	5.90588e-90	4.95435e-89	Up	NA	NA	NA	NA	gi|345569603|gb|EGX52469.1|//hypothetical protein AOL_s00043g258 [Arthrobotrys oligospora ATCC 24927]
AOL_s00007g149	1478	0.13	13.55	6.70364	2.97188e-19	8.91755e-19	Up	NA	NA	NA	NA	gi|345569988|gb|EGX52813.1|//hypothetical protein AOL_s00007g149 [Arthrobotrys oligospora ATCC 24927]
AOL_s00140g66	2533	0.15	15.6	6.70044	1.00919e-58	6.02157e-58	Up	NA	NA	NA	NA	gi|345562714|gb|EGX45750.1|//hypothetical protein AOL_s00140g66 [Arthrobotrys oligospora ATCC 24927]
AOL_s00007g80	1268	0.06	6.22	6.69581	2.10872e-24	7.18847e-24	Up	NA	NA	NA	NA	gi|345570307|gb|EGX53131.1|//hypothetical protein AOL_s00007g80 [Arthrobotrys oligospora ATCC 24927]
AOL_s00006g490	2000	0.18	18.65	6.69503	4.3555e-117	4.50036e-116	Up	NA	NA	NA	K05692//actin beta/gamma 1;K00777;K14855//ribosome assembly protein 4	gi|345570407|gb|EGX53229.1|//hypothetical protein AOL_s00006g490 [Arthrobotrys oligospora ATCC 24927]
AOL_s00140g7	953	0.15	15.5	6.69116	1.43637e-29	5.43963e-29	Up	NA	NA	NA	K02321//DNA polymerase alpha subunit B	gi|345562655|gb|EGX45691.1|//hypothetical protein AOL_s00140g7 [Arthrobotrys oligospora ATCC 24927]
AOL_s00110g159	2678	0.01	1.03	6.6865	4.70152e-05	8.12802e-05	Up	NA	NA	NA	NA	gi|345563332|gb|EGX46335.1|//hypothetical protein AOL_s00110g159 [Arthrobotrys oligospora ATCC 24927]
AOL_s00083g117	1839	3.27	336.14	6.68363	0	0	Up	NA	NA	NA	NA	gi|345564649|gb|EGX47609.1|//hypothetical protein AOL_s00083g117 [Arthrobotrys oligospora ATCC 24927]
AOL_s00043g247	5883	0.2	20.53	6.68159	2.33722e-203	4.02641e-202	Up	NA	GO:0005488//binding	GO:0006351//transcription, DNA-templated	K12236//transcriptional repressor NF-X1;K11701//helicase required for RNAi-mediated heterochromatin assembly 1 [EC:3.6.4.13]	gi|345569592|gb|EGX52458.1|//hypothetical protein AOL_s00043g247 [Arthrobotrys oligospora ATCC 24927]
AOL_s00076g127	1869	0.55	55.98	6.66934	1.47579e-115	1.50485e-114	Up	NA	GO:0003824//catalytic activity	NA	K04487//cysteine desulfurase [EC:2.8.1.7]	gi|345567431|gb|EGX50363.1|//hypothetical protein AOL_s00076g127 [Arthrobotrys oligospora ATCC 24927]
AOL_s00210g12	3934	0.57	57.76	6.66297	2.76814e-205	4.83129e-204	Up	NA	GO:0003677//DNA binding;GO:0046914//transition metal ion binding;GO:0001071//nucleic acid binding transcription factor activity	GO:0006351//transcription, DNA-templated	K09184//GATA-binding protein, other eukaryote	gi|345561109|gb|EGX44223.1|//hypothetical protein AOL_s00210g12 [Arthrobotrys oligospora ATCC 24927]
AOL_s00110g283	2922	0.01	1.01	6.65821	2.3102e-05	4.07014e-05	Up	NA	NA	NA	NA	gi|345563115|gb|EGX46119.1|//hypothetical protein AOL_s00110g283 [Arthrobotrys oligospora ATCC 24927]
AOL_s00110g317	2729	0.01	1.01	6.65821	4.70152e-05	8.11899e-05	Up	NA	NA	NA	NA	gi|345563149|gb|EGX46153.1|//hypothetical protein AOL_s00110g317 [Arthrobotrys oligospora ATCC 24927]
AOL_s00043g370	2835	0.13	12.91	6.63383	1.8292e-54	1.04016e-53	Up	GO:0016020//membrane	NA	NA	K07300//Ca2+:H+ antiporter	gi|345569360|gb|EGX52227.1|//hypothetical protein AOL_s00043g370 [Arthrobotrys oligospora ATCC 24927]
AOL_s00210g74	4308	0.01	0.99	6.62936	1.59789e-07	3.17602e-07	Up	NA	NA	NA	NA	gi|345561087|gb|EGX44202.1|//hypothetical protein AOL_s00210g74 [Arthrobotrys oligospora ATCC 24927]
AOL_s00140g25	1395	0.14	13.68	6.6105	7.38678e-20	2.26017e-19	Up	NA	NA	NA	K11244//cell wall integrity and stress response component;K05389//potassium channel subfamily K, other eukaryote;K01183//chitinase [EC:3.2.1.14]	gi|345562673|gb|EGX45709.1|//hypothetical protein AOL_s00140g25 [Arthrobotrys oligospora ATCC 24927]
AOL_s00080g385	1700	0.13	12.66	6.60562	3.00658e-53	1.68094e-52	Up	NA	NA	NA	NA	gi|345565309|gb|EGX48260.1|//hypothetical protein AOL_s00080g385 [Arthrobotrys oligospora ATCC 24927]
AOL_s00173g236	2091	0.13	12.64	6.60334	6.17036e-40	2.81212e-39	Up	NA	NA	NA	K15110//solute carrier family 25 (mitochondrial 2-oxodicarboxylate transporter), member 21;K02155//V-type H+-transporting ATPase 16kDa proteolipid subunit;K00777	gi|345562063|gb|EGX45135.1|//hypothetical protein AOL_s00173g236 [Arthrobotrys oligospora ATCC 24927]
AOL_s00083g246	630	0.19	18.44	6.6007	1.797e-16	4.97714e-16	Up	NA	NA	NA	NA	gi|345564778|gb|EGX47738.1|//hypothetical protein AOL_s00083g246 [Arthrobotrys oligospora ATCC 24927]
AOL_s00215g265	437	0.12	11.6	6.59495	6.6179e-07	1.27173e-06	Up	NA	NA	NA	NA	gi|345560404|gb|EGX43529.1|//hypothetical protein AOL_s00215g265 [Arthrobotrys oligospora ATCC 24927]
AOL_s00210g18	2603	2.36	216.9	6.5221	0	0	Up	NA	NA	NA	NA	gi|345561115|gb|EGX44229.1|//hypothetical protein AOL_s00210g18 [Arthrobotrys oligospora ATCC 24927]
AOL_s00110g185	7898	0.81	74.4	6.52124	0	0	Up	NA	NA	NA	K09246//arginine metabolism regulation protein II	gi|526205762|gb|EPS45893.1|//hypothetical protein H072_165 [Dactylellina haptotyla CBS 200.50];gi|345563017|gb|EGX46021.1|//hypothetical protein AOL_s00110g185 [Arthrobotrys oligospora ATCC 24927]
AOL_s00076g120	3653	1.87	168.44	6.49305	0	0	Up	NA	NA	NA	K11361//transcription factor SPT20;K03135//transcription initiation factor TFIID subunit 11;K16302//metal transporter CNNM;K01178//glucoamylase [EC:3.2.1.3];K00752//hyaluronan synthase [EC:2.4.1.212]	gi|345567423|gb|EGX50355.1|//hypothetical protein AOL_s00076g119 [Arthrobotrys oligospora ATCC 24927];gi|345567424|gb|EGX50356.1|//hypothetical protein AOL_s00076g120 [Arthrobotrys oligospora ATCC 24927]
AOL_s00210g164	8391	0.21	18.84	6.48727	1.24566e-236	2.52932e-235	Up	NA	GO:0097159//organic cyclic compound binding;GO:1901363//heterocyclic compound binding;GO:0046872//metal ion binding;GO:0016491//oxidoreductase activity	GO:2001057//reactive nitrogen species metabolic process;GO:0044237//cellular metabolic process;GO:0044710//single-organism metabolic process	K10534//nitrate reductase (NAD(P)H) [EC:1.7.1.1 1.7.1.2 1.7.1.3]	gi|345560886|gb|EGX44003.1|//hypothetical protein AOL_s00210g164 [Arthrobotrys oligospora ATCC 24927];gi|345560885|gb|EGX44002.1|//hypothetical protein AOL_s00210g163 [Arthrobotrys oligospora ATCC 24927]
AOL_s00210g304	2812	0.63	55.23	6.45396	2.52428e-234	5.05942e-233	Up	NA	NA	NA	NA	gi|345560738|gb|EGX43857.1|//hypothetical protein AOL_s00210g304 [Arthrobotrys oligospora ATCC 24927]
AOL_s00007g460	753	0.85	74.43	6.45228	7.65188e-74	5.46061e-73	Up	NA	NA	NA	NA	gi|345569851|gb|EGX52677.1|//hypothetical protein AOL_s00007g460 [Arthrobotrys oligospora ATCC 24927]
AOL_s00006g410	1755	0.33	28.81	6.44796	1.25266e-72	8.85795e-72	Up	NA	GO:0050662//coenzyme binding;GO:0016491//oxidoreductase activity	GO:0044281//small molecule metabolic process	K00108//choline dehydrogenase [EC:1.1.99.1];K01908//propionyl-CoA synthetase [EC:6.2.1.17]	gi|345570723|gb|EGX53544.1|//hypothetical protein AOL_s00006g410 [Arthrobotrys oligospora ATCC 24927]
AOL_s00054g36	4617	0.01	0.87	6.44294	6.6179e-07	1.27094e-06	Up	NA	GO:0043566//structure-specific DNA binding;GO:0032559//adenyl ribonucleotide binding;GO:0042623//ATPase activity, coupled	GO:0033554//cellular response to stress;GO:0006259//DNA metabolic process	K10958//DNA repair protein RAD57;K10870//RAD51-like protein 2	gi|526197828|gb|EPS39047.1|//hypothetical protein H072_7187 [Dactylellina haptotyla CBS 200.50];gi|345568745|gb|EGX51637.1|//hypothetical protein AOL_s00054g36 [Arthrobotrys oligospora ATCC 24927]
AOL_s00080g288	576	25	2121.96	6.40733	0	0	Up	NA	NA	NA	NA	gi|1296439|emb|CAA65781.1|//lectin [Arthrobotrys oligospora];gi|345565710|gb|EGX48659.1|//hypothetical protein AOL_s00080g288 [Arthrobotrys oligospora ATCC 24927]
AOL_s00188g198	1192	0.17	14.1	6.37402	4.24096e-24	1.4373e-23	Up	NA	NA	NA	NA	gi|345561441|gb|EGX44530.1|//hypothetical protein AOL_s00188g198 [Arthrobotrys oligospora ATCC 24927]
AOL_s00210g162	1796	2.9	238.47	6.36161	0	0	Up	NA	GO:0051537//2 iron, 2 sulfur cluster binding;GO:0020037//heme binding;GO:0005506//iron ion binding;GO:0005488//binding;GO:0051536//iron-sulfur cluster binding;GO:0046872//metal ion binding;GO:0008942//nitrite reductase [NAD(P)H] activity;GO:0000166//nucleotide binding;GO:0046857//oxidoreductase activity, acting on other nitrogenous compounds as donors, with NAD or NADP as acceptor;GO:0016491//oxi…	GO:0042128//nitrate assimilation;GO:0008152//metabolic process;GO:0042126//nitrate metabolic process;GO:0055114//oxidation-reduction process	K17877//nitrite reductase (NAD(P)H) [EC:1.7.1.4]	gi|367040391|ref|XP_003650576.1|//hypothetical protein THITE_2110175 [Thielavia terrestris NRRL 8126];gi|345560884|gb|EGX44001.1|//hypothetical protein AOL_s00210g162 [Arthrobotrys oligospora ATCC 24927]
AOL_s00054g852	2853	0.01	0.82	6.35755	2.3102e-05	4.06707e-05	Up	NA	NA	NA	NA	gi|345567864|gb|EGX50766.1|//hypothetical protein AOL_s00054g852 [Arthrobotrys oligospora ATCC 24927]
AOL_s00210g275	2099	0.45	36.17	6.32872	5.07638e-107	4.84753e-106	Up	NA	GO:0016491//oxidoreductase activity	NA	K07117//uncharacterized protein;K19069//cellobiose dehydrogenase (acceptor) [EC:1.1.99.18]	gi|345560841|gb|EGX43959.1|//hypothetical protein AOL_s00210g275 [Arthrobotrys oligospora ATCC 24927]
AOL_s00007g531	2442	2.17	172.75	6.31485	0	0	Up	GO:0031224//intrinsic component of membrane;GO:0042645//mitochondrial nucleoid;GO:0016021//integral component of membrane	GO:0003677//DNA binding;GO:0005371//tricarboxylate secondary active transmembrane transporter activity	GO:0035674//tricarboxylic acid transmembrane transport;GO:0006843//mitochondrial citrate transport;GO:0000002//mitochondrial genome maintenance;GO:0051234//establishment of localization;GO:0015742//alpha-ketoglutarate transport	K15100//solute carrier family 25 (mitochondrial citrate transporter), member 1	gi|345569773|gb|EGX52600.1|//hypothetical protein AOL_s00007g531 [Arthrobotrys oligospora ATCC 24927]
AOL_s00081g290	4447	0.09	7.16	6.31389	1.64315e-40	7.55881e-40	Up	GO:0016020//membrane	NA	NA	NA	gi|345565007|gb|EGX47963.1|//hypothetical protein AOL_s00081g290 [Arthrobotrys oligospora ATCC 24927]
AOL_s00054g550	7055	0.21	16.69	6.31245	1.45358e-90	1.226e-89	Up	NA	NA	NA	K00777	gi|345568277|gb|EGX51174.1|//hypothetical protein AOL_s00054g550 [Arthrobotrys oligospora ATCC 24927]
AOL_s00173g60	1638	5.26	417.48	6.3105	0	0	Up	NA	GO:0003824//catalytic activity	GO:0008152//metabolic process	K00540	gi|345561887|gb|EGX44959.1|//hypothetical protein AOL_s00173g60 [Arthrobotrys oligospora ATCC 24927]
AOL_s00169g95	1141	0.44	34.69	6.30087	8.25716e-58	4.87376e-57	Up	NA	NA	NA	NA	gi|345562421|gb|EGX45489.1|//hypothetical protein AOL_s00169g95 [Arthrobotrys oligospora ATCC 24927]
AOL_s00054g544	618	0.68	52.8	6.27886	5.43588e-43	2.60877e-42	Up	NA	NA	NA	NA	gi|345568271|gb|EGX51168.1|//hypothetical protein AOL_s00054g544 [Arthrobotrys oligospora ATCC 24927]
AOL_s00078g500	365	0.2	15.43	6.26959	3.25188e-07	6.36178e-07	Up	NA	NA	NA	NA	gi|345566524|gb|EGX49467.1|//hypothetical protein AOL_s00078g500 [Arthrobotrys oligospora ATCC 24927]
AOL_s00076g129	4902	0.08	6.16	6.26679	2.34492e-45	1.17815e-44	Up	NA	NA	NA	NA	gi|345567433|gb|EGX50365.1|//hypothetical protein AOL_s00076g129 [Arthrobotrys oligospora ATCC 24927]
AOL_s00080g348	2563	0.19	14.57	6.26086	9.39242e-145	1.17342e-143	Up	NA	NA	NA	K00777;K14855//ribosome assembly protein 4	gi|345565272|gb|EGX48223.1|//hypothetical protein AOL_s00080g348 [Arthrobotrys oligospora ATCC 24927]
AOL_s00007g234	2862	0.01	0.76	6.24793	0.000396274	0.000643203	Up	NA	NA	NA	NA	gi|345570073|gb|EGX52898.1|//hypothetical protein AOL_s00007g234 [Arthrobotrys oligospora ATCC 24927]
AOL_s00006g512	1401	0.14	10.52	6.23156	2.26726e-21	7.25399e-21	Up	NA	NA	NA	K01183//chitinase [EC:3.2.1.14]	gi|345570429|gb|EGX53251.1|//hypothetical protein AOL_s00006g512 [Arthrobotrys oligospora ATCC 24927]
AOL_s00088g22	3511	0.81	59.97	6.21018	0	0	Up	NA	NA	NA	NA	gi|345564339|gb|EGX47307.1|//hypothetical protein AOL_s00088g22 [Arthrobotrys oligospora ATCC 24927]
AOL_s00007g266	969	0.6	43.8	6.18982	5.2161e-121	5.55589e-120	Up	NA	NA	NA	NA	gi|345570105|gb|EGX52930.1|//hypothetical protein AOL_s00007g266 [Arthrobotrys oligospora ATCC 24927]
AOL_s00083g128	1149	8.5	616.13	6.17963	0	0	Up	NA	NA	NA	NA	gi|345564660|gb|EGX47620.1|//hypothetical protein AOL_s00083g128 [Arthrobotrys oligospora ATCC 24927]
AOL_s00054g300	2202	0.17	12.28	6.17463	2.325e-32	9.26818e-32	Up	NA	NA	NA	NA	gi|345568708|gb|EGX51601.1|//hypothetical protein AOL_s00054g300 [Arthrobotrys oligospora ATCC 24927]
AOL_s00210g202	2810	0.22	15.81	6.16719	1.8333e-55	1.05212e-54	Up	NA	NA	NA	K15110//solute carrier family 25 (mitochondrial 2-oxodicarboxylate transporter), member 21;K10380//ankyrin;K02155//V-type H+-transporting ATPase 16kDa proteolipid subunit;K00777	gi|345560924|gb|EGX44041.1|//hypothetical protein AOL_s00210g202 [Arthrobotrys oligospora ATCC 24927]
AOL_s00006g546	2346	0.15	10.73	6.16054	4.028e-83	3.16001e-82	Up	NA	NA	NA	K01279//tripeptidyl-peptidase I [EC:3.4.14.9];K06653//CDK inhibitor PHO81;K18696//glycerophosphodiester phosphodiesterase [EC:3.1.4.46];K06694//26S proteasome non-ATPase regulatory subunit 10;K08803//death-associated protein kinase [EC:2.7.11.1];K16261//yeast amino acid transporter;K00777;K16726//ankyrin repeat domain-containing protein 17	gi|345570345|gb|EGX53168.1|//hypothetical protein AOL_s00006g546 [Arthrobotrys oligospora ATCC 24927]
AOL_s00076g46	1513	0.78	55.4	6.15027	9.1152e-117	9.40794e-116	Up	NA	NA	NA	NA	gi|345567350|gb|EGX50282.1|//hypothetical protein AOL_s00076g46 [Arthrobotrys oligospora ATCC 24927]
AOL_s00080g422	2684	1.26	88.72	6.13776	2.31262e-297	5.87292e-296	Up	NA	NA	NA	NA	gi|345565346|gb|EGX48297.1|//hypothetical protein AOL_s00080g422 [Arthrobotrys oligospora ATCC 24927]
AOL_s00210g218	1770	0.96	67.51	6.13592	1.11027e-137	1.33175e-136	Up	NA	GO:0032559//adenyl ribonucleotide binding;GO:0017111//nucleoside-triphosphatase activity;GO:0005488//binding;GO:0003676//nucleic acid binding	NA	K15505//DNA repair protein RAD5 [EC:3.6.4.-];K11649//SWI/SNF related-matrix-associated actin-dependent regulator of chromatin subfamily C;K15711//SWI/SNF-related matrix-associated actin-dependent regulator of chromatin subfamily A3 [EC:3.6.4.- 2.3.2.27]	gi|345560940|gb|EGX44057.1|//hypothetical protein AOL_s00210g218 [Arthrobotrys oligospora ATCC 24927]
AOL_s00097g338	788	0.8	56.22	6.13494	4.34746e-58	2.57586e-57	Up	NA	NA	NA	K18064//arsenical-resistance protein 2	gi|345563929|gb|EGX46912.1|//hypothetical protein AOL_s00097g338 [Arthrobotrys oligospora ATCC 24927]
AOL_s00007g84	1590	2.38	163.1	6.09865	0	0	Up	NA	NA	NA	NA	gi|345569923|gb|EGX52748.1|//hypothetical protein AOL_s00007g84 [Arthrobotrys oligospora ATCC 24927]
AOL_s00110g302	5269	0.18	12.33	6.09803	1.88017e-97	1.67047e-96	Up	NA	NA	NA	K14997//solute carrier family 38 (sodium-coupled neutral amino acid transporter), member 11	gi|345563134|gb|EGX46138.1|//hypothetical protein AOL_s00110g302 [Arthrobotrys oligospora ATCC 24927]
AOL_s00043g265	1750	0.33	22.5	6.09132	9.84044e-49	5.18445e-48	Up	NA	NA	NA	NA	gi|345569610|gb|EGX52476.1|//hypothetical protein AOL_s00043g265 [Arthrobotrys oligospora ATCC 24927]
AOL_s00078g430	959	0.12	8.18	6.09099	2.79708e-36	1.20299e-35	Up	NA	NA	NA	K15110//solute carrier family 25 (mitochondrial 2-oxodicarboxylate transporter), member 21;K02155//V-type H+-transporting ATPase 16kDa proteolipid subunit;K00777;K18626//trichohyalin;K03255//protein TIF31	gi|345566454|gb|EGX49397.1|//hypothetical protein AOL_s00078g430 [Arthrobotrys oligospora ATCC 24927]
AOL_s00097g250	1975	0.12	8.07	6.07146	7.57706e-12	1.81212e-11	Up	NA	NA	NA	K00777;K06694//26S proteasome non-ATPase regulatory subunit 10	gi|345563841|gb|EGX46824.1|//hypothetical protein AOL_s00097g250 [Arthrobotrys oligospora ATCC 24927]
BGI_novel_G000007	4389	0.09	6.05	6.07087	2.66356e-39	1.20448e-38	Up	NA	NA	NA	K15110//solute carrier family 25 (mitochondrial 2-oxodicarboxylate transporter), member 21;K02155//V-type H+-transporting ATPase 16kDa proteolipid subunit;K00777	gi|667649549|ref|XP_008596606.1|//Pfs, NACHT and Ankyrin domain protein [Beauveria bassiana ARSEF 2860]
AOL_s00076g336	1741	0.11	7.23	6.03842	2.39434e-18	7.01076e-18	Up	NA	NA	NA	NA	gi|345567196|gb|EGX50131.1|//hypothetical protein AOL_s00076g336 [Arthrobotrys oligospora ATCC 24927]
AOL_s00188g307	2391	2.71	177.96	6.03712	0	0	Up	NA	NA	NA	K15454//tRNA pseudouridine synthase 9 [EC:5.4.99.-];K00540;K04487//cysteine desulfurase [EC:2.8.1.7];K01501//nitrilase [EC:3.5.5.1];K01166//ribonuclease T2 [EC:3.1.27.1]	gi|345561550|gb|EGX44639.1|//hypothetical protein AOL_s00188g307 [Arthrobotrys oligospora ATCC 24927]
AOL_s00083g328	2962	0.17	11.04	6.02106	7.41682e-54	4.17925e-53	Up	NA	NA	NA	K00777;K16261//yeast amino acid transporter	gi|345564558|gb|EGX47519.1|//hypothetical protein AOL_s00083g328 [Arthrobotrys oligospora ATCC 24927]
AOL_s00076g59	784	0.1	6.39	5.99774	1.19463e-18	3.53346e-18	Up	NA	NA	NA	NA	gi|345567363|gb|EGX50295.1|//hypothetical protein AOL_s00076g59 [Arthrobotrys oligospora ATCC 24927]
AOL_s00079g277	2040	0.04	2.55	5.99435	7.71498e-17	2.15992e-16	Up	NA	NA	NA	K01279//tripeptidyl-peptidase I [EC:3.4.14.9];K00777	gi|345566109|gb|EGX49056.1|//hypothetical protein AOL_s00079g277 [Arthrobotrys oligospora ATCC 24927]
AOL_s00215g189	630	0.22	13.92	5.98351	1.07603e-13	2.73931e-13	Up	NA	NA	NA	K03190//urease accessory protein	gi|345560328|gb|EGX43453.1|//hypothetical protein AOL_s00215g189 [Arthrobotrys oligospora ATCC 24927]
AOL_s00188g303	4023	0.28	17.64	5.97728	2.2424e-62	1.40263e-61	Up	NA	NA	NA	NA	gi|345561546|gb|EGX44635.1|//hypothetical protein AOL_s00188g303 [Arthrobotrys oligospora ATCC 24927]
AOL_s00004g267	521	0.68	42.55	5.96748	9.60382e-28	3.51976e-27	Up	GO:0044464//cell part	GO:0032559//adenyl ribonucleotide binding;GO:0000166//nucleotide binding;GO:0017111//nucleoside-triphosphatase activity;GO:0016407//acetyltransferase activity	GO:0009207//purine ribonucleoside triphosphate catabolic process	K08711//ATP-binding cassette, subfamily G (WHITE), member 2, PDR;K05681//ATP-binding cassette, subfamily G (WHITE), member 2;K08712//ATP-binding cassette, subfamily G (WHITE), member 2, SNQ2;K05658//ATP-binding cassette, subfamily B (MDR/TAP), member 1 [EC:3.6.3.44]	gi|345571420|gb|EGX54234.1|//hypothetical protein AOL_s00004g267 [Arthrobotrys oligospora ATCC 24927]
AOL_s00076g398	5569	0.01	0.62	5.9542	2.7409e-06	5.10904e-06	Up	NA	NA	NA	NA	gi|345567111|gb|EGX50047.1|//hypothetical protein AOL_s00076g398 [Arthrobotrys oligospora ATCC 24927]
AOL_s00076g503	2114	0.27	16.67	5.94815	1.92781e-33	7.8528e-33	Up	NA	NA	NA	K11972//E3 ubiquitin-protein ligase RNF19A [EC:2.3.2.27];K11968//ariadne-1 [EC:2.3.2.27]	gi|345566924|gb|EGX49862.1|//hypothetical protein AOL_s00076g503 [Arthrobotrys oligospora ATCC 24927]
AOL_s00173g33	1080	0.25	15.31	5.9364	3.3236e-82	2.58133e-81	Up	NA	GO:0016702//oxidoreductase activity, acting on single donors with incorporation of molecular oxygen, incorporation of two atoms of oxygen;GO:0016209//antioxidant activity;GO:0005506//iron ion binding;GO:0016491//oxidoreductase activity	GO:0006693//prostaglandin metabolic process;GO:0042743//hydrogen peroxide metabolic process;GO:0006950//response to stress	K00509//prostaglandin-endoperoxide synthase 1 [EC:1.14.99.1];K17863//linoleate 8R-lipoxygenase / 9,12-octadecadienoate 8-hydroperoxide 8R-isomerase [EC:1.13.11.60 5.4.4.5];K17862//linoleate 10R-lipoxygenase [EC:1.13.11.62];K11987//prostaglandin-endoperoxide synthase 2 [EC:1.14.99.1]	gi|345561860|gb|EGX44932.1|//hypothetical protein AOL_s00173g33 [Arthrobotrys oligospora ATCC 24927]
AOL_s00215g897	3473	0.86	52.1	5.9208	4.43358e-177	6.70795e-176	Up	NA	NA	NA	NA	gi|345559816|gb|EGX42948.1|//hypothetical protein AOL_s00215g897 [Arthrobotrys oligospora ATCC 24927];gi|345559815|gb|EGX42947.1|//hypothetical protein AOL_s00215g896 [Arthrobotrys oligospora ATCC 24927]
AOL_s00083g116	1510	6.64	401.14	5.91678	0	0	Up	NA	NA	NA	NA	gi|345564648|gb|EGX47608.1|//hypothetical protein AOL_s00083g116 [Arthrobotrys oligospora ATCC 24927]
AOL_s00006g233	1448	0.27	16.08	5.89616	2.36876e-26	8.41343e-26	Up	NA	NA	NA	K10356//myosin I;K03504//DNA polymerase delta subunit 3;K14775//ribosome biogenesis protein UTP30;K11275//histone H1/5	gi|345570546|gb|EGX53367.1|//hypothetical protein AOL_s00006g233 [Arthrobotrys oligospora ATCC 24927]
AOL_s00110g287	2513	1.22	72.54	5.89382	1.22028e-170	1.7826e-169	Up	NA	NA	NA	NA	gi|345563119|gb|EGX46123.1|//hypothetical protein AOL_s00110g287 [Arthrobotrys oligospora ATCC 24927]
AOL_s00173g338	2906	0.29	17.23	5.89273	5.0338e-46	2.54834e-45	Up	NA	NA	NA	NA	gi|345562165|gb|EGX45237.1|//hypothetical protein AOL_s00173g338 [Arthrobotrys oligospora ATCC 24927]
AOL_s00076g206	1385	0.14	8.28	5.88613	1.54389e-16	4.29141e-16	Up	NA	NA	NA	NA	gi|345567510|gb|EGX50442.1|//hypothetical protein AOL_s00076g206 [Arthrobotrys oligospora ATCC 24927]
AOL_s00173g317	5072	0.11	6.45	5.87372	7.8772e-48	4.10142e-47	Up	NA	NA	NA	K00600//glycine hydroxymethyltransferase [EC:2.1.2.1]	gi|345562143|gb|EGX45215.1|//hypothetical protein AOL_s00173g316 [Arthrobotrys oligospora ATCC 24927];gi|345562144|gb|EGX45216.1|//hypothetical protein AOL_s00173g317 [Arthrobotrys oligospora ATCC 24927]
AOL_s00188g240	4065	0.22	12.88	5.87149	4.34746e-58	2.57423e-57	Up	NA	NA	NA	K11236//cell division control protein 24	gi|345561483|gb|EGX44572.1|//hypothetical protein AOL_s00188g240 [Arthrobotrys oligospora ATCC 24927]
AOL_s00081g324	1565	0.25	14.53	5.86096	4.72834e-29	1.77622e-28	Up	NA	NA	NA	K08857//NIMA (never in mitosis gene a)-related kinase [EC:2.7.11.1];K08286//protein-serine/threonine kinase [EC:2.7.11.-];K02202//cyclin-dependent kinase 7 [EC:2.7.11.22 2.7.11.23]	gi|345565041|gb|EGX47997.1|//hypothetical protein AOL_s00081g324 [Arthrobotrys oligospora ATCC 24927]
AOL_s00215g274	2666	13.69	794.76	5.85932	0	0	Up	NA	NA	NA	K03686//molecular chaperone DnaJ;K00100;K00540//null	gi|345560413|gb|EGX43538.1|//hypothetical protein AOL_s00215g274 [Arthrobotrys oligospora ATCC 24927];gi|345560412|gb|EGX43537.1|//hypothetical protein AOL_s00215g273 [Arthrobotrys oligospora ATCC 24927]
AOL_s00088g8	705	2.08	120.11	5.85163	8.06404e-152	1.06004e-150	Up	NA	NA	NA	NA	gi|345564325|gb|EGX47293.1|//hypothetical protein AOL_s00088g8 [Arthrobotrys oligospora ATCC 24927]
AOL_s00080g133	386	0.33	18.98	5.84587	2.24922e-09	4.8887e-09	Up	NA	GO:0016614//oxidoreductase activity, acting on CH-OH group of donors;GO:0043169//cation binding;GO:0000166//nucleotide binding;GO:0016615//malate dehydrogenase activity;GO:0005488//binding	GO:0043648//dicarboxylic acid metabolic process;GO:0008152//metabolic process	K00027//malate dehydrogenase (oxaloacetate-decarboxylating) [EC:1.1.1.38]	gi|345565555|gb|EGX48504.1|//hypothetical protein AOL_s00080g133 [Arthrobotrys oligospora ATCC 24927]
AOL_s00188g286	1304	0.14	8.03	5.8419	3.0887e-16	8.50419e-16	Up	NA	NA	NA	NA	gi|345561529|gb|EGX44618.1|//hypothetical protein AOL_s00188g286 [Arthrobotrys oligospora ATCC 24927]
AOL_s00110g161	1296	0.61	34.97	5.84116	8.9855e-62	5.57927e-61	Up	NA	NA	NA	NA	gi|345563334|gb|EGX46337.1|//hypothetical protein AOL_s00110g161 [Arthrobotrys oligospora ATCC 24927]
AOL_s00078g171	1486	0.34	19.2	5.81943	3.64034e-52	2.00638e-51	Up	NA	NA	NA	K00706//1,3-beta-glucan synthase [EC:2.4.1.34];K00688//starch phosphorylase [EC:2.4.1.1];K01881//prolyl-tRNA synthetase [EC:6.1.1.15];K01183//chitinase [EC:3.2.1.14];K01930//folylpolyglutamate synthase [EC:6.3.2.17]	gi|345566740|gb|EGX49682.1|//hypothetical protein AOL_s00078g171 [Arthrobotrys oligospora ATCC 24927]
AOL_s00173g332	3710	0.2	11.28	5.81762	2.88146e-51	1.57416e-50	Up	NA	NA	NA	K00505//tyrosinase [EC:1.14.18.1]	gi|345562159|gb|EGX45231.1|//hypothetical protein AOL_s00173g332 [Arthrobotrys oligospora ATCC 24927]
AOL_s00173g301	7751	0.95	53.3	5.81006	1.20489e-214	2.19758e-213	Up	NA	GO:0005488//binding	NA	K12236//transcriptional repressor NF-X1;K11701//helicase required for RNAi-mediated heterochromatin assembly 1 [EC:3.6.4.13]	gi|345562128|gb|EGX45200.1|//hypothetical protein AOL_s00173g301 [Arthrobotrys oligospora ATCC 24927]
AOL_s00078g182	516	5.9	328.19	5.79767	1.10883e-174	1.65085e-173	Up	NA	GO:0016746//transferase activity, transferring acyl groups	NA	K00626//acetyl-CoA C-acetyltransferase [EC:2.3.1.9]	gi|345566751|gb|EGX49693.1|//hypothetical protein AOL_s00078g182 [Arthrobotrys oligospora ATCC 24927]
AOL_s00088g17	732	0.29	15.99	5.78497	1.23509e-15	3.34138e-15	Up	NA	NA	NA	NA	gi|345564334|gb|EGX47302.1|//hypothetical protein AOL_s00088g17 [Arthrobotrys oligospora ATCC 24927]
AOL_s00004g91	3447	0.05	2.72	5.76553	3.92632e-14	1.0117e-13	Up	NA	NA	GO:0009987//cellular process	K15110//solute carrier family 25 (mitochondrial 2-oxodicarboxylate transporter), member 21;K02155//V-type H+-transporting ATPase 16kDa proteolipid subunit;K00777	gi|345571244|gb|EGX54058.1|//hypothetical protein AOL_s00004g91 [Arthrobotrys oligospora ATCC 24927]
AOL_s00215g342	1800	0.22	11.95	5.76336	1.48595e-30	5.7133e-30	Up	NA	NA	NA	K08002//matrix metalloproteinase-24 (membrane-inserted) [EC:3.4.24.-]	gi|345560481|gb|EGX43606.1|//hypothetical protein AOL_s00215g342 [Arthrobotrys oligospora ATCC 24927]
AOL_s00007g321	4779	0.31	16.78	5.75833	1.14186e-97	1.01644e-96	Up	NA	NA	NA	K08857//NIMA (never in mitosis gene a)-related kinase [EC:2.7.11.1];K08794//calcium/calmodulin-dependent protein kinase I [EC:2.7.11.17];K02202//cyclin-dependent kinase 7 [EC:2.7.11.22 2.7.11.23]	gi|345570160|gb|EGX52985.1|//hypothetical protein AOL_s00007g321 [Arthrobotrys oligospora ATCC 24927]
AOL_s00007g102	7720	2.58	138.66	5.74804	0	0	Up	NA	NA	NA	NA	gi|345569941|gb|EGX52766.1|//hypothetical protein AOL_s00007g102 [Arthrobotrys oligospora ATCC 24927]
AOL_s00054g928	1744	0.43	22.76	5.72602	2.82766e-56	1.63587e-55	Up	NA	NA	NA	NA	gi|345567940|gb|EGX50842.1|//hypothetical protein AOL_s00054g928 [Arthrobotrys oligospora ATCC 24927]
AOL_s00097g422	1214	0.5	26.46	5.72574	1.27827e-43	6.21463e-43	Up	NA	NA	NA	NA	gi|345563808|gb|EGX46792.1|//hypothetical protein AOL_s00097g422 [Arthrobotrys oligospora ATCC 24927]
AOL_s00043g281	1035	0.2	10.58	5.7252	2.46862e-15	6.60567e-15	Up	NA	NA	NA	K17741//NADPH-dependent methylglyoxal reductase [EC:1.1.1.283]	gi|345569626|gb|EGX52492.1|//hypothetical protein AOL_s00043g281 [Arthrobotrys oligospora ATCC 24927]
AOL_s00076g256	3692	0.43	22.68	5.72094	1.33989e-73	9.55456e-73	Up	NA	NA	NA	K15110//solute carrier family 25 (mitochondrial 2-oxodicarboxylate transporter), member 21;K05692//actin beta/gamma 1;K02155//V-type H+-transporting ATPase 16kDa proteolipid subunit;K00777;K14855//ribosome assembly protein 4	gi|345567247|gb|EGX50181.1|//hypothetical protein AOL_s00076g256 [Arthrobotrys oligospora ATCC 24927]
AOL_s00079g478	1213	0.28	14.63	5.70736	1.04837e-24	3.58958e-24	Up	NA	NA	NA	NA	gi|345565891|gb|EGX48839.1|//hypothetical protein AOL_s00079g478 [Arthrobotrys oligospora ATCC 24927]
AOL_s00078g530	3376	0.17	8.8	5.6939	1.01152e-20	3.17632e-20	Up	NA	NA	NA	NA	gi|345566554|gb|EGX49497.1|//hypothetical protein AOL_s00078g530 [Arthrobotrys oligospora ATCC 24927]
AOL_s00004g579	3366	5.64	288.25	5.67548	0	0	Up	NA	NA	NA	K13431//signal recognition particle receptor subunit alpha;K01196//glycogen debranching enzyme [EC:2.4.1.25 3.2.1.33]	gi|345571105|gb|EGX53920.1|//hypothetical protein AOL_s00004g579 [Arthrobotrys oligospora ATCC 24927]
AOL_s00097g261	3292	0.01	0.51	5.67243	9.56806e-05	0.000161841	Up	NA	NA	NA	K01057//6-phosphogluconolactonase [EC:3.1.1.31]	gi|345563853|gb|EGX46836.1|//hypothetical protein AOL_s00097g262 [Arthrobotrys oligospora ATCC 24927];gi|345563852|gb|EGX46835.1|//hypothetical protein AOL_s00097g261 [Arthrobotrys oligospora ATCC 24927]
AOL_s00097g14	1257	1.07	54.55	5.6719	1.24454e-95	1.09117e-94	Up	NA	NA	NA	K06001//tryptophan synthase beta chain [EC:4.2.1.20];K00831//phosphoserine aminotransferase [EC:2.6.1.52]	gi|345564195|gb|EGX47175.1|//hypothetical protein AOL_s00097g14 [Arthrobotrys oligospora ATCC 24927]
AOL_s00080g250	9218	1.4	71	5.66432	9.95158e-227	1.93227e-225	Up	NA	NA	NA	K16261//yeast amino acid transporter;K00777	gi|345565672|gb|EGX48621.1|//hypothetical protein AOL_s00080g250 [Arthrobotrys oligospora ATCC 24927]
AOL_s00078g557	2004	0.39	19.65	5.65491	7.29874e-55	4.1656e-54	Up	NA	NA	NA	K01062//platelet-activating factor acetylhydrolase [EC:3.1.1.47]	gi|345566229|gb|EGX49173.1|//hypothetical protein AOL_s00078g557 [Arthrobotrys oligospora ATCC 24927]
AOL_s00188g186	640	0.34	17.11	5.65316	2.10872e-24	7.18584e-24	Up	NA	NA	NA	NA	gi|345561429|gb|EGX44518.1|//hypothetical protein AOL_s00188g186 [Arthrobotrys oligospora ATCC 24927]
AOL_s00080g393	4479	14.49	724.3	5.64346	0	0	Up	GO:0031224//intrinsic component of membrane;GO:0016021//integral component of membrane	GO:0008519//ammonium transmembrane transporter activity;GO:0015101//organic cation transmembrane transporter activity	GO:0072488//ammonium transmembrane transport;GO:0015696//ammonium transport	K03320//ammonium transporter, Amt family	gi|345565317|gb|EGX48268.1|//hypothetical protein AOL_s00080g393 [Arthrobotrys oligospora ATCC 24927]
AOL_s00215g123	1190	0.34	16.92	5.63705	1.49782e-27	5.47867e-27	Up	NA	NA	NA	NA	gi|345560262|gb|EGX43387.1|//hypothetical protein AOL_s00215g123 [Arthrobotrys oligospora ATCC 24927]
AOL_s00210g297	1279	0.16	7.74	5.59619	3.92632e-14	1.01198e-13	Up	NA	NA	NA	K06005//candidapepsin [EC:3.4.23.24]	gi|345560731|gb|EGX43850.1|//hypothetical protein AOL_s00210g297 [Arthrobotrys oligospora ATCC 24927]
AOL_s00083g269	10736	7	336.73	5.58809	0	0	Up	GO:0016021//integral component of membrane	GO:0016740//transferase activity	NA	K01061//carboxymethylenebutenolidase [EC:3.1.1.45]	gi|526195213|gb|EPS36885.1|//hypothetical protein H072_9521 [Dactylellina haptotyla CBS 200.50];gi|345564801|gb|EGX47761.1|//hypothetical protein AOL_s00083g269 [Arthrobotrys oligospora ATCC 24927]
AOL_s00188g317	4072	0.63	30.28	5.58687	1.02331e-169	1.48325e-168	Up	NA	NA	NA	NA	gi|345561560|gb|EGX44649.1|//hypothetical protein AOL_s00188g317 [Arthrobotrys oligospora ATCC 24927];gi|345561561|gb|EGX44650.1|//hypothetical protein AOL_s00188g318 [Arthrobotrys oligospora ATCC 24927]
AOL_s00188g193	2764	0.34	16.24	5.57787	8.39802e-63	5.28491e-62	Up	NA	NA	NA	K01178//glucoamylase [EC:3.2.1.3];K01183//chitinase [EC:3.2.1.14]	gi|345561436|gb|EGX44525.1|//hypothetical protein AOL_s00188g193 [Arthrobotrys oligospora ATCC 24927]
AOL_s00097g307	1134	0.36	17.11	5.5707	2.36876e-26	8.41664e-26	Up	NA	NA	NA	NA	gi|345563898|gb|EGX46881.1|//hypothetical protein AOL_s00097g307 [Arthrobotrys oligospora ATCC 24927]
AOL_s00004g382	4056	0.3	14.22	5.56682	1.95308e-84	1.55446e-83	Up	NA	NA	NA	K01178//glucoamylase [EC:3.2.1.3];K01183//chitinase [EC:3.2.1.14]	gi|345571535|gb|EGX54349.1|//hypothetical protein AOL_s00004g382 [Arthrobotrys oligospora ATCC 24927]
AOL_s00043g369	3123	0.53	25.03	5.56152	9.88172e-92	8.42613e-91	Up	NA	NA	NA	K00698//chitin synthase [EC:2.4.1.16];K08329//autophagy-related protein 17	gi|345569359|gb|EGX52226.1|//hypothetical protein AOL_s00043g369 [Arthrobotrys oligospora ATCC 24927]
AOL_s00210g126	8889	0.27	12.72	5.558	2.22556e-161	3.07292e-160	Up	NA	NA	NA	K14572//midasin	gi|345561029|gb|EGX44145.1|//hypothetical protein AOL_s00210g126 [Arthrobotrys oligospora ATCC 24927]
AOL_s00078g485	7250	1.49	69.58	5.54529	2.18734e-98	1.96019e-97	Up	NA	NA	NA	K00100;K10251//17beta-estradiol 17-dehydrogenase / very-long-chain 3-oxoacyl-CoA reductase [EC:1.1.1.62 1.1.1.330]	gi|345566509|gb|EGX49452.1|//hypothetical protein AOL_s00078g485 [Arthrobotrys oligospora ATCC 24927]
AOL_s00215g317	2759	0.47	21.85	5.53883	9.01276e-104	8.3915e-103	Up	NA	NA	GO:0008152//metabolic process	K00777;K03255//protein TIF31	gi|345560456|gb|EGX43581.1|//hypothetical protein AOL_s00215g317 [Arthrobotrys oligospora ATCC 24927]
AOL_s00173g45	1539	0.13	6.03	5.53557	1.56233e-13	3.95784e-13	Up	NA	NA	NA	NA	gi|345561872|gb|EGX44944.1|//hypothetical protein AOL_s00173g45 [Arthrobotrys oligospora ATCC 24927]
AOL_s00078g326	6954	2.61	120.9	5.53362	0	0	Up	NA	NA	NA	NA	gi|345566350|gb|EGX49293.1|//hypothetical protein AOL_s00078g326 [Arthrobotrys oligospora ATCC 24927]
AOL_s00097g136	1620	0.6	27.74	5.53086	2.3921e-87	1.96426e-86	Up	NA	NA	NA	NA	gi|345564109|gb|EGX47090.1|//hypothetical protein AOL_s00097g136 [Arthrobotrys oligospora ATCC 24927]
AOL_s00215g838	4528	1.44	66.15	5.5216	1.3236e-235	2.67591e-234	Up	NA	GO:0003824//catalytic activity;GO:0016791//phosphatase activity	GO:0008152//metabolic process;GO:0016311//dephosphorylation	K01077//alkaline phosphatase [EC:3.1.3.1];K01178//glucoamylase [EC:3.2.1.3]	gi|345559921|gb|EGX43052.1|//hypothetical protein AOL_s00215g838 [Arthrobotrys oligospora ATCC 24927]
AOL_s00043g449	2656	0.23	10.45	5.50573	9.30146e-32	3.66243e-31	Up	NA	NA	NA	K03135//transcription initiation factor TFIID subunit 11;K00752//hyaluronan synthase [EC:2.4.1.212]	gi|345569191|gb|EGX52059.1|//hypothetical protein AOL_s00043g449 [Arthrobotrys oligospora ATCC 24927]
AOL_s00097g164	6937	0.83	37.61	5.50186	3.24136e-137	3.86805e-136	Up	NA	NA	NA	K17846//krueppel-like factor 4;K09238//metallothionein expression activator;K09202//regulatory protein SWI5	gi|345564137|gb|EGX47118.1|//hypothetical protein AOL_s00097g164 [Arthrobotrys oligospora ATCC 24927]
AOL_s00210g119	5140	0.18	8	5.47393	2.28662e-59	1.37581e-58	Up	GO:0016020//membrane	GO:0003824//catalytic activity;GO:0005488//binding	GO:0008152//metabolic process	K07119//uncharacterized protein;K13953//alcohol dehydrogenase, propanol-preferring [EC:1.1.1.1];K00344//NADPH2:quinone reductase [EC:1.6.5.5]	gi|345561022|gb|EGX44138.1|//hypothetical protein AOL_s00210g119 [Arthrobotrys oligospora ATCC 24927]
AOL_s00215g239	3029	0.75	33.28	5.47162	5.82562e-48	3.04172e-47	Up	NA	NA	NA	NA	gi|345560378|gb|EGX43503.1|//hypothetical protein AOL_s00215g239 [Arthrobotrys oligospora ATCC 24927]
AOL_s00007g71	2751	0.08	3.54	5.46761	4.3816e-20	1.34997e-19	Up	NA	NA	NA	K18721//nucleoporin NUP1;K01178//glucoamylase [EC:3.2.1.3];K01183//chitinase [EC:3.2.1.14]	gi|345570298|gb|EGX53122.1|//hypothetical protein AOL_s00007g71 [Arthrobotrys oligospora ATCC 24927]
AOL_s00215g919	1509	1.35	59.61	5.46452	2.71552e-100	2.45954e-99	Up	NA	NA	NA	K10380//ankyrin;K16726//ankyrin repeat domain-containing protein 17	gi|345559838|gb|EGX42970.1|//hypothetical protein AOL_s00215g919 [Arthrobotrys oligospora ATCC 24927]
AOL_s00170g57	813	1.55	68.4	5.46366	7.5867e-70	5.20678e-69	Up	NA	NA	NA	NA	gi|345562281|gb|EGX45350.1|//hypothetical protein AOL_s00170g57 [Arthrobotrys oligospora ATCC 24927]
AOL_s00076g495	2845	0.33	14.45	5.45246	2.0108e-45	1.01191e-44	Up	NA	NA	NA	K05747//Wiskott-Aldrich syndrome protein	gi|345567072|gb|EGX50009.1|//hypothetical protein AOL_s00076g495 [Arthrobotrys oligospora ATCC 24927]
AOL_s00215g38	1224	0.65	28.36	5.44727	2.93744e-37	1.28349e-36	Up	NA	NA	NA	NA	gi|345560177|gb|EGX43302.1|//hypothetical protein AOL_s00215g38 [Arthrobotrys oligospora ATCC 24927]
AOL_s00076g100	2568	1.64	71.21	5.44031	1.36458e-248	2.91028e-247	Up	NA	NA	NA	NA	gi|345567404|gb|EGX50336.1|//hypothetical protein AOL_s00076g100 [Arthrobotrys oligospora ATCC 24927]
AOL_s00091g64	1067	0.14	6.07	5.4382	4.89694e-12	1.17962e-11	Up	NA	NA	NA	K03469//ribonuclease HI [EC:3.1.26.4];K03247//translation initiation factor 3 subunit H	gi|345564269|gb|EGX47243.1|//hypothetical protein AOL_s00091g64 [Arthrobotrys oligospora ATCC 24927]
AOL_s00173g246	2253	2.81	121.06	5.42901	0	0	Up	NA	NA	NA	NA	gi|345562073|gb|EGX45145.1|//hypothetical protein AOL_s00173g246 [Arthrobotrys oligospora ATCC 24927]
AOL_s00188g212	1173	0.39	16.78	5.42712	5.1926e-13	1.29398e-12	Up	NA	GO:0016787//hydrolase activity;GO:0046914//transition metal ion binding;GO:0008270//zinc ion binding;GO:0003824//catalytic activity	NA	K01485//cytosine deaminase [EC:3.5.4.1]	gi|345561455|gb|EGX44544.1|//hypothetical protein AOL_s00188g212 [Arthrobotrys oligospora ATCC 24927]
AOL_s00188g338	1431	0.14	6	5.42146	2.46098e-12	5.99956e-12	Up	NA	NA	NA	NA	gi|345561343|gb|EGX44433.1|//hypothetical protein AOL_s00188g338 [Arthrobotrys oligospora ATCC 24927]
AOL_s00083g131	1544	0.23	9.82	5.41602	4.3816e-20	1.34952e-19	Up	NA	NA	NA	NA	gi|345564663|gb|EGX47623.1|//hypothetical protein AOL_s00083g131 [Arthrobotrys oligospora ATCC 24927]
AOL_s00210g219	4578	0.56	23.8	5.40939	1.467e-167	2.09059e-166	Up	NA	GO:0005488//binding	NA	K10380//ankyrin;K00777;K16261//yeast amino acid transporter	gi|345560941|gb|EGX44058.1|//hypothetical protein AOL_s00210g219 [Arthrobotrys oligospora ATCC 24927]
AOL_s00078g526	2616	0.73	30.87	5.40217	2.19322e-107	2.09865e-106	Up	NA	NA	NA	NA	gi|345566550|gb|EGX49493.1|//hypothetical protein AOL_s00078g526 [Arthrobotrys oligospora ATCC 24927]
AOL_s00054g583	848	0.37	15.62	5.39973	1.19678e-15	3.23962e-15	Up	NA	NA	NA	K00777	gi|345568310|gb|EGX51207.1|//hypothetical protein AOL_s00054g583 [Arthrobotrys oligospora ATCC 24927]
AOL_s00004g182	1230	0.21	8.79	5.3874	1.96715e-14	5.13123e-14	Up	NA	NA	NA	NA	gi|345571335|gb|EGX54149.1|//hypothetical protein AOL_s00004g182 [Arthrobotrys oligospora ATCC 24927]
AOL_s00076g77	1424	1.24	51.83	5.38538	5.42256e-131	6.247e-130	Up	NA	NA	NA	NA	gi|345567381|gb|EGX50313.1|//hypothetical protein AOL_s00076g77 [Arthrobotrys oligospora ATCC 24927]
AOL_s00043g240	892	58.63	2436.03	5.37675	0	0	Up	NA	NA	NA	NA	gi|345569585|gb|EGX52451.1|//hypothetical protein AOL_s00043g240 [Arthrobotrys oligospora ATCC 24927]
AOL_s00076g248	1590	3.27	135.76	5.37562	5.50832e-252	1.1939e-250	Up	GO:0044429//mitochondrial part;GO:0070013//intracellular organelle lumen	GO:0016209//antioxidant activity;GO:0005506//iron ion binding;GO:0004601//peroxidase activity;GO:0005488//binding	GO:0006979//response to oxidative stress;GO:0008152//metabolic process;GO:0042221//response to chemical;GO:0006950//response to stress;GO:0009987//cellular process	K00428//cytochrome c peroxidase [EC:1.11.1.5]	gi|345567239|gb|EGX50173.1|//hypothetical protein AOL_s00076g248 [Arthrobotrys oligospora ATCC 24927]
AOL_s00043g280	1539	0.64	26.54	5.37395	9.60678e-61	5.90212e-60	Up	NA	NA	NA	NA	gi|345569625|gb|EGX52491.1|//hypothetical protein AOL_s00043g280 [Arthrobotrys oligospora ATCC 24927]
AOL_s00043g213	4005	0.23	9.51	5.36974	1.25342e-17	3.59886e-17	Up	NA	NA	NA	NA	gi|345569558|gb|EGX52424.1|//hypothetical protein AOL_s00043g213 [Arthrobotrys oligospora ATCC 24927]
AOL_s00078g23	1890	0.72	29.68	5.36535	1.21526e-70	8.38982e-70	Up	NA	NA	NA	NA	gi|345566592|gb|EGX49534.1|//hypothetical protein AOL_s00078g23 [Arthrobotrys oligospora ATCC 24927]
AOL_s00088g43	1098	1.27	51.64	5.34559	6.0794e-84	4.81803e-83	Up	NA	NA	NA	NA	gi|345564360|gb|EGX47328.1|//hypothetical protein AOL_s00088g43 [Arthrobotrys oligospora ATCC 24927]
AOL_s00193g103	267	1.11	45.13	5.34546	7.12718e-30	2.71013e-29	Up	NA	GO:0016879//ligase activity, forming carbon-nitrogen bonds;GO:0016810//hydrolase activity, acting on carbon-nitrogen (but not peptide) bonds	NA	K01426//amidase [EC:3.5.1.4]	gi|345561279|gb|EGX44375.1|//hypothetical protein AOL_s00193g103 [Arthrobotrys oligospora ATCC 24927]
AOL_s00081g110	2911	0.46	18.67	5.34294	5.73182e-34	2.35333e-33	Up	NA	NA	NA	NA	gi|345565161|gb|EGX48114.1|//hypothetical protein AOL_s00081g110 [Arthrobotrys oligospora ATCC 24927]
AOL_s00078g610	1003	0.33	13.32	5.33498	6.6333e-27	2.39343e-26	Up	NA	NA	NA	NA	gi|345566282|gb|EGX49226.1|//hypothetical protein AOL_s00078g610 [Arthrobotrys oligospora ATCC 24927]
AOL_s00169g179	1529	0.09	3.63	5.3339	1.79693e-08	3.75081e-08	Up	NA	NA	NA	K15110//solute carrier family 25 (mitochondrial 2-oxodicarboxylate transporter), member 21;K02155//V-type H+-transporting ATPase 16kDa proteolipid subunit;K00777	gi|345562505|gb|EGX45573.1|//hypothetical protein AOL_s00169g179 [Arthrobotrys oligospora ATCC 24927]
AOL_s00043g347	2008	0.26	10.48	5.33298	7.62874e-54	4.29606e-53	Up	NA	NA	NA	K15110//solute carrier family 25 (mitochondrial 2-oxodicarboxylate transporter), member 21;K01279//tripeptidyl-peptidase I [EC:3.4.14.9];K06653//CDK inhibitor PHO81;K02155//V-type H+-transporting ATPase 16kDa proteolipid subunit;K08803//death-associated protein kinase [EC:2.7.11.1];K16261//yeast amino acid transporter;K00777	gi|345569337|gb|EGX52204.1|//hypothetical protein AOL_s00043g347 [Arthrobotrys oligospora ATCC 24927]
AOL_s00173g34	3237	2.35	93.84	5.31947	0	0	Up	NA	GO:0016209//antioxidant activity;GO:0016705//oxidoreductase activity, acting on paired donors, with incorporation or reduction of molecular oxygen;GO:0020037//heme binding;GO:0016701//oxidoreductase activity, acting on single donors with incorporation of molecular oxygen;GO:0004601//peroxidase activity;GO:0005506//iron ion binding;GO:0016491//oxidoreductase activity	GO:0006979//response to oxidative stress;GO:0008152//metabolic process;GO:0006950//response to stress;GO:0055114//oxidation-reduction process	K17863//linoleate 8R-lipoxygenase / 9,12-octadecadienoate 8-hydroperoxide 8R-isomerase [EC:1.13.11.60 5.4.4.5];K17862//linoleate 10R-lipoxygenase [EC:1.13.11.62];K11987//prostaglandin-endoperoxide synthase 2 [EC:1.14.99.1]	gi|345561861|gb|EGX44933.1|//hypothetical protein AOL_s00173g34 [Arthrobotrys oligospora ATCC 24927]
AOL_s00004g80	979	1.21	48.13	5.31386	1.80684e-90	1.51983e-89	Up	NA	GO:0000166//nucleotide binding;GO:0003824//catalytic activity	GO:0009987//cellular process	K10380//ankyrin;K15110//solute carrier family 25 (mitochondrial 2-oxodicarboxylate transporter), member 21;K16261//yeast amino acid transporter;K02155//V-type H+-transporting ATPase 16kDa proteolipid subunit;K00777	gi|345571233|gb|EGX54047.1|//hypothetical protein AOL_s00004g80 [Arthrobotrys oligospora ATCC 24927]
AOL_s00076g572	1119	0.54	21.47	5.31322	1.18165e-31	4.64291e-31	Up	NA	NA	NA	NA	gi|345566993|gb|EGX49931.1|//hypothetical protein AOL_s00076g572 [Arthrobotrys oligospora ATCC 24927]
AOL_s00083g433	5964	0.23	9.11	5.30775	7.39518e-66	4.82993e-65	Up	NA	NA	NA	K11498//centromeric protein E;K09291//nucleoprotein TPR	gi|345564535|gb|EGX47497.1|//hypothetical protein AOL_s00083g433 [Arthrobotrys oligospora ATCC 24927]
AOL_s00076g27	2124	0.09	3.56	5.30581	3.84584e-11	8.98327e-11	Up	NA	NA	NA	NA	gi|345567546|gb|EGX50477.1|//hypothetical protein AOL_s00076g27 [Arthrobotrys oligospora ATCC 24927]
AOL_s00079g351	7437	5.04	198.81	5.30182	1.04331e-70	7.21873e-70	Up	NA	NA	NA	K13100//pre-mRNA-splicing factor CWC22;K15183//RNA polymerase II elongation factor ELL;K13171//serine/arginine repetitive matrix protein 1;K11422//histone-lysine N-methyltransferase SETD1 [EC:2.1.1.43]	gi|345565764|gb|EGX48712.1|//hypothetical protein AOL_s00079g351 [Arthrobotrys oligospora ATCC 24927]
AOL_s00078g131	363	1.85	72.68	5.29596	2.36766e-29	8.93023e-29	Up	NA	GO:0016616//oxidoreductase activity, acting on the CH-OH group of donors, NAD or NADP as acceptor;GO:0000166//nucleotide binding	GO:0019318//hexose metabolic process	K00036//glucose-6-phosphate 1-dehydrogenase [EC:1.1.1.49 1.1.1.363]	gi|701770041|gb|KGQ05055.1|//Glucose-6-phosphate 1-dehydrogenase [Beauveria bassiana D1-5];gi|345566700|gb|EGX49642.1|//hypothetical protein AOL_s00078g131 [Arthrobotrys oligospora ATCC 24927]
AOL_s00043g215	2367	0.16	6.27	5.29232	1.4818e-19	4.48534e-19	Up	NA	NA	NA	K12828//splicing factor 3B subunit 1;K10380//ankyrin;K16261//yeast amino acid transporter;K00777	gi|345569560|gb|EGX52426.1|//hypothetical protein AOL_s00043g215 [Arthrobotrys oligospora ATCC 24927]
AOL_s00054g748	1022	25.76	1006.69	5.28834	0	0	Up	GO:0044424//intracellular part	GO:0016616//oxidoreductase activity, acting on the CH-OH group of donors, NAD or NADP as acceptor;GO:0048037//cofactor binding	GO:0006072//glycerol-3-phosphate metabolic process	K00006//glycerol-3-phosphate dehydrogenase (NAD+) [EC:1.1.1.8]	gi|345568111|gb|EGX51012.1|//hypothetical protein AOL_s00054g748 [Arthrobotrys oligospora ATCC 24927]
AOL_s00004g58	690	0.5	19.41	5.27873	7.71498e-17	2.16057e-16	Up	NA	NA	NA	NA	gi|345571211|gb|EGX54025.1|//hypothetical protein AOL_s00004g58 [Arthrobotrys oligospora ATCC 24927]
AOL_s00043g405	1235	3.73	144.73	5.27804	8.10224e-229	1.58308e-227	Up	NA	NA	NA	NA	gi|345569147|gb|EGX52015.1|//hypothetical protein AOL_s00043g405 [Arthrobotrys oligospora ATCC 24927]
AOL_s00006g583	2342	0.49	19.01	5.27783	1.78089e-111	1.75268e-110	Up	NA	GO:0005488//binding	NA	K15110//solute carrier family 25 (mitochondrial 2-oxodicarboxylate transporter), member 21;K05692//actin beta/gamma 1;K02155//V-type H+-transporting ATPase 16kDa proteolipid subunit;K00777;K14855//ribosome assembly protein 4	gi|345570382|gb|EGX53205.1|//hypothetical protein AOL_s00006g583 [Arthrobotrys oligospora ATCC 24927]
AOL_s00043g508	1750	0.68	26.37	5.27722	6.12866e-71	4.24993e-70	Up	GO:0051233//spindle midzone;GO:0043234//protein complex	GO:0032559//adenyl ribonucleotide binding;GO:0004672//protein kinase activity;GO:0000166//nucleotide binding	GO:0034502//protein localization to chromosome;GO:0000070//mitotic sister chromatid segregation;GO:0006464//cellular protein modification process;GO:0050789//regulation of biological process;GO:0006468//protein phosphorylation	K08850//aurora kinase, other [EC:2.7.11.1]	gi|345569250|gb|EGX52118.1|//hypothetical protein AOL_s00043g508 [Arthrobotrys oligospora ATCC 24927]
AOL_s00112g81	1794	0.22	8.52	5.27528	2.83228e-21	9.04621e-21	Up	NA	GO:0003824//catalytic activity	NA	NA	gi|345562884|gb|EGX45892.1|//hypothetical protein AOL_s00112g81 [Arthrobotrys oligospora ATCC 24927]
AOL_s00004g7	2300	0.38	14.69	5.27269	1.83583e-51	1.00529e-50	Up	NA	NA	NA	NA	gi|345571545|gb|EGX54358.1|//hypothetical protein AOL_s00004g7 [Arthrobotrys oligospora ATCC 24927]
BGI_novel_G000050	2691	1.06	40.72	5.2636	1.54856e-147	1.97978e-146	Up	NA	NA	NA	NA	gi|345561085|gb|EGX44200.1|//hypothetical protein AOL_s00210g72 [Arthrobotrys oligospora ATCC 24927]
AOL_s00054g290	1771	0.11	4.16	5.24101	6.9766e-08	1.41567e-07	Up	NA	GO:0048037//cofactor binding	GO:0006810//transport;GO:0008152//metabolic process	K03848//alpha-1,3-glucosyltransferase [EC:2.4.1.267];K08192//MFS transporter, ACS family, allantoate permease	gi|345568698|gb|EGX51591.1|//hypothetical protein AOL_s00054g290 [Arthrobotrys oligospora ATCC 24927]
AOL_s00076g500	2147	0.13	4.88	5.2303	3.11456e-13	7.80944e-13	Up	NA	NA	NA	NA	gi|345566921|gb|EGX49859.1|//hypothetical protein AOL_s00076g500 [Arthrobotrys oligospora ATCC 24927]
AOL_s00076g658	4442	20.81	779.2	5.22664	0	0	Up	NA	GO:0000166//nucleotide binding;GO:0004812//aminoacyl-tRNA ligase activity	GO:0006418//tRNA aminoacylation for protein translation	K01876//aspartyl-tRNA synthetase [EC:6.1.1.12]	gi|345566834|gb|EGX49774.1|//hypothetical protein AOL_s00076g658 [Arthrobotrys oligospora ATCC 24927]
AOL_s00007g106	864	0.24	8.97	5.224	1.51504e-10	3.449e-10	Up	NA	NA	NA	NA	gi|345569945|gb|EGX52770.1|//hypothetical protein AOL_s00007g106 [Arthrobotrys oligospora ATCC 24927]
AOL_s00170g37	2025	0.19	7.1	5.22375	4.3816e-20	1.34908e-19	Up	NA	NA	NA	K06758//L1 cell adhesion molecule like protein;K03283//heat shock 70kDa protein 1/8;K06640//serine/threonine-protein kinase ATR [EC:2.7.11.1];K09490//heat shock 70kDa protein 5	gi|345562261|gb|EGX45330.1|//hypothetical protein AOL_s00170g37 [Arthrobotrys oligospora ATCC 24927]
AOL_s00078g154	1737	16.04	585.76	5.19056	0	0	Up	NA	NA	NA	NA	gi|345566723|gb|EGX49665.1|//hypothetical protein AOL_s00078g154 [Arthrobotrys oligospora ATCC 24927]
AOL_s00109g63	1988	0.39	14.18	5.18424	3.78794e-38	1.68192e-37	Up	NA	NA	NA	K06674//structural maintenance of chromosome 2;K06123//1-acylglycerone phosphate reductase [EC:1.1.1.101];K14950//cation-transporting ATPase 13A1 [EC:3.6.3.-];K01613//phosphatidylserine decarboxylase [EC:4.1.1.65];K14213//Xaa-Pro dipeptidase [EC:3.4.13.9]	gi|345563491|gb|EGX46491.1|//hypothetical protein AOL_s00109g63 [Arthrobotrys oligospora ATCC 24927]
AOL_s00173g103	4578	0.12	4.36	5.18322	4.33538e-28	1.60086e-27	Up	NA	GO:0003824//catalytic activity	GO:0008152//metabolic process	K04565//superoxide dismutase, Cu-Zn family [EC:1.15.1.1]	gi|345561930|gb|EGX45002.1|//hypothetical protein AOL_s00173g103 [Arthrobotrys oligospora ATCC 24927]
AOL_s00210g255	947	3.61	130.79	5.17911	1.10576e-160	1.51778e-159	Up	NA	NA	NA	K03871//von Hippel-Lindau disease tumor supressor	gi|345560977|gb|EGX44094.1|//hypothetical protein AOL_s00210g255 [Arthrobotrys oligospora ATCC 24927]
AOL_s00170g27	3757	1.86	67	5.17079	0	0	Up	NA	GO:0005488//binding	NA	K08254//glucan endo-1,3-alpha-glucosidase [EC:3.2.1.59]	gi|345562251|gb|EGX45320.1|//hypothetical protein AOL_s00170g27 [Arthrobotrys oligospora ATCC 24927]
AOL_s00076g394	3150	0.1	3.6	5.16993	1.33364e-18	3.93339e-18	Up	NA	NA	NA	NA	gi|345567107|gb|EGX50043.1|//hypothetical protein AOL_s00076g394 [Arthrobotrys oligospora ATCC 24927]
AOL_s00215g366	1658	1.18	42.43	5.16823	4.13812e-92	3.53504e-91	Up	NA	NA	NA	NA	gi|345560505|gb|EGX43630.1|//hypothetical protein AOL_s00215g366 [Arthrobotrys oligospora ATCC 24927]
AOL_s00173g363	1054	0.19	6.78	5.15721	5.9527e-10	1.32535e-09	Up	NA	GO:0003824//catalytic activity	GO:0008152//metabolic process	K00100;K00540//null;K17742//sorbose reductase [EC:1.1.1.289];K17738//D-arabinitol 2-dehydrogenase [EC:1.1.1.250]	gi|526193108|gb|EPS35340.1|//hypothetical protein H072_11286 [Dactylellina haptotyla CBS 200.50];gi|345562190|gb|EGX45262.1|//hypothetical protein AOL_s00173g363 [Arthrobotrys oligospora ATCC 24927]
AOL_s00215g283	10616	10.27	362.63	5.14199	0	0	Up	NA	GO:0003824//catalytic activity;GO:0005488//binding	GO:0008152//metabolic process	K15320//6-methylsalicylic acid synthase [EC:2.3.1.165]	gi|345560422|gb|EGX43547.1|//hypothetical protein AOL_s00215g283 [Arthrobotrys oligospora ATCC 24927]
AOL_s00110g28	333	0.8	28	5.12928	5.9527e-10	1.32567e-09	Up	NA	NA	NA	K17361//acyl-coenzyme A thioesterase 9 [EC:3.1.2.-]	gi|345563201|gb|EGX46204.1|//hypothetical protein AOL_s00110g28 [Arthrobotrys oligospora ATCC 24927]
AOL_s00081g304	1035	0.39	13.63	5.12717	1.33364e-18	3.93464e-18	Up	NA	NA	NA	K06653//CDK inhibitor PHO81;K06694//26S proteasome non-ATPase regulatory subunit 10;K16726//ankyrin repeat domain-containing protein 17	gi|345565021|gb|EGX47977.1|//hypothetical protein AOL_s00081g304 [Arthrobotrys oligospora ATCC 24927]
AOL_s00097g631	1778	0.8	27.82	5.11998	2.27936e-88	1.88665e-87	Up	GO:0044464//cell part	NA	GO:0050896//response to stimulus	K07511//enoyl-CoA hydratase [EC:4.2.1.17]	gi|345563573|gb|EGX46561.1|//hypothetical protein AOL_s00097g631 [Arthrobotrys oligospora ATCC 24927]
AOL_s00215g840	4100	0.87	29.62	5.08941	6.80174e-67	4.48002e-66	Up	NA	NA	NA	NA	gi|345559923|gb|EGX43054.1|//hypothetical protein AOL_s00215g840 [Arthrobotrys oligospora ATCC 24927]
AOL_s00097g75	2121	23.76	806.97	5.08591	0	0	Up	NA	NA	GO:0006351//transcription, DNA-templated;GO:0006259//DNA metabolic process	K03143//transcription initiation factor TFIIH subunit 3	gi|345564048|gb|EGX47029.1|//hypothetical protein AOL_s00097g75 [Arthrobotrys oligospora ATCC 24927]
AOL_s00110g134	1021	1.99	67.44	5.08276	7.30994e-83	5.71549e-82	Up	NA	NA	NA	NA	gi|345563307|gb|EGX46310.1|//hypothetical protein AOL_s00110g134 [Arthrobotrys oligospora ATCC 24927]
AOL_s00169g96	3547	0.9	30.49	5.08227	2.94102e-174	4.3647e-173	Up	NA	NA	NA	K15110//solute carrier family 25 (mitochondrial 2-oxodicarboxylate transporter), member 21;K11293//protein HIRA/HIR1;K02155//V-type H+-transporting ATPase 16kDa proteolipid subunit;K00777	gi|345562422|gb|EGX45490.1|//hypothetical protein AOL_s00169g96 [Arthrobotrys oligospora ATCC 24927]
AOL_s00043g743	945	0.22	7.43	5.07779	1.17866e-09	2.58901e-09	Up	NA	NA	NA	K07297//adiponectin receptor	gi|345568854|gb|EGX51724.1|//hypothetical protein AOL_s00043g743 [Arthrobotrys oligospora ATCC 24927]
AOL_s00188g304	1673	15.64	528.17	5.07769	0	0	Up	NA	NA	NA	NA	gi|345561547|gb|EGX44636.1|//hypothetical protein AOL_s00188g304 [Arthrobotrys oligospora ATCC 24927]
AOL_s00188g334	1515	1.82	61.37	5.07552	1.91126e-119	2.00822e-118	Up	NA	NA	NA	K00540	gi|345561339|gb|EGX44429.1|//hypothetical protein AOL_s00188g334 [Arthrobotrys oligospora ATCC 24927]
AOL_s00097g301	519	0.88	29.66	5.07487	5.21448e-18	1.51446e-17	Up	NA	NA	NA	K09983//uncharacterized protein	gi|345563892|gb|EGX46875.1|//hypothetical protein AOL_s00097g301 [Arthrobotrys oligospora ATCC 24927]
AOL_s00215g427	2536	1.21	40.42	5.06199	3.98604e-74	2.85329e-73	Up	NA	GO:0016709//oxidoreductase activity, acting on paired donors, with incorporation or reduction of molecular oxygen, NAD(P)H as one donor, and incorporation of one atom of oxygen;GO:0000166//nucleotide binding;GO:0050662//coenzyme binding;GO:0016491//oxidoreductase activity	GO:0008152//metabolic process	K00485//dimethylaniline monooxygenase (N-oxide forming) [EC:1.14.13.8]	gi|345560566|gb|EGX43691.1|//hypothetical protein AOL_s00215g427 [Arthrobotrys oligospora ATCC 24927]
AOL_s00076g490	2628	0.07	2.33	5.05683	4.61014e-09	9.86149e-09	Up	NA	NA	NA	NA	gi|345567067|gb|EGX50004.1|//hypothetical protein AOL_s00076g490 [Arthrobotrys oligospora ATCC 24927]
AOL_s00075g64	2036	0.57	18.93	5.05357	4.00592e-51	2.18334e-50	Up	NA	GO:0003824//catalytic activity	GO:0008152//metabolic process;GO:0044238//primary metabolic process	K15110//solute carrier family 25 (mitochondrial 2-oxodicarboxylate transporter), member 21;K02155//V-type H+-transporting ATPase 16kDa proteolipid subunit;K00777	gi|345567710|gb|EGX50638.1|//hypothetical protein AOL_s00075g64 [Arthrobotrys oligospora ATCC 24927]
AOL_s00173g35	2311	2.75	91.2	5.05153	1.43984e-178	2.18911e-177	Up	NA	NA	NA	NA	gi|345561862|gb|EGX44934.1|//hypothetical protein AOL_s00173g35 [Arthrobotrys oligospora ATCC 24927]
AOL_s00210g54	1836	2.79	91.34	5.03291	4.07766e-154	5.43688e-153	Up	NA	NA	NA	NA	gi|345561067|gb|EGX44182.1|//hypothetical protein AOL_s00210g54 [Arthrobotrys oligospora ATCC 24927]
AOL_s00080g132	3218	1.13	36.75	5.02335	3.02154e-116	3.1014e-115	Up	NA	NA	NA	K11121//NAD-dependent histone deacetylase SIR2 [EC:3.5.1.-];K04640//guanine nucleotide-binding protein subunit alpha, other	gi|345565554|gb|EGX48503.1|//hypothetical protein AOL_s00080g132 [Arthrobotrys oligospora ATCC 24927]
AOL_s00079g230	752	0.1	3.25	5.02237	2.332e-09	5.05565e-09	Up	NA	NA	NA	NA	gi|345566062|gb|EGX49009.1|//hypothetical protein AOL_s00079g230 [Arthrobotrys oligospora ATCC 24927]
AOL_s00075g54	738	0.58	18.82	5.02007	2.03536e-17	5.80997e-17	Up	NA	NA	NA	K06630//14-3-3 protein epsilon	gi|345567700|gb|EGX50628.1|//hypothetical protein AOL_s00075g54 [Arthrobotrys oligospora ATCC 24927]
AOL_s00043g239	3036	0.22	7.07	5.00613	4.79242e-44	2.35205e-43	Up	NA	NA	NA	K01178//glucoamylase [EC:3.2.1.3];K01183//chitinase [EC:3.2.1.14]	gi|345569584|gb|EGX52450.1|//hypothetical protein AOL_s00043g239 [Arthrobotrys oligospora ATCC 24927]
AOL_s00210g320	1642	0.12	3.83	4.99624	3.96396e-06	7.32873e-06	Up	NA	NA	NA	NA	gi|345560754|gb|EGX43873.1|//hypothetical protein AOL_s00210g320 [Arthrobotrys oligospora ATCC 24927]
AOL_s00215g831	11036	0.65	20.7	4.99305	6.55792e-54	3.69975e-53	Up	GO:0016021//integral component of membrane	GO:0015238//drug transmembrane transporter activity;GO:0015297//antiporter activity;GO:0022857//transmembrane transporter activity	GO:0006810//transport;GO:0006855//drug transmembrane transport	K03327//multidrug resistance protein, MATE family	gi|345559914|gb|EGX43045.1|//hypothetical protein AOL_s00215g831 [Arthrobotrys oligospora ATCC 24927]
AOL_s00004g421	513	0.35	11.13	4.99095	1.59789e-07	3.17332e-07	Up	NA	NA	NA	NA	gi|345570947|gb|EGX53762.1|//hypothetical protein AOL_s00004g421 [Arthrobotrys oligospora ATCC 24927]
AOL_s00078g188	1067	0.54	17.14	4.98826	6.77858e-68	4.52229e-67	Up	NA	NA	NA	K16315//serine/threonine-protein kinase haspin [EC:2.7.11.1]	gi|345566757|gb|EGX49699.1|//hypothetical protein AOL_s00078g188 [Arthrobotrys oligospora ATCC 24927]
AOL_s00054g649	381	3.1	97.44	4.97417	7.9027e-41	3.66434e-40	Up	GO:0031224//intrinsic component of membrane	GO:0008493//tetracycline transporter activity	GO:0006810//transport;GO:0015850//organic hydroxy compound transport;GO:0042221//response to chemical	K01952//phosphoribosylformylglycinamidine synthase [EC:6.3.5.3];K08165//MFS transporter, DHA2 family, multidrug resistance protein;K13095//splicing factor 1;K10866//DNA repair protein RAD50 [EC:3.6.-.-];K14708//solute carrier family 26 (sodium-independent sulfate anion transporter), member 11	gi|345568012|gb|EGX50913.1|//hypothetical protein AOL_s00054g649 [Arthrobotrys oligospora ATCC 24927]
AOL_s00173g305	4685	0.08	2.51	4.97154	1.5092e-07	3.00679e-07	Up	NA	GO:0003677//DNA binding;GO:0005488//binding	NA	K08741//DNA mismatch repair protein MSH5	gi|345562132|gb|EGX45204.1|//hypothetical protein AOL_s00173g305 [Arthrobotrys oligospora ATCC 24927]
AOL_s00188g257	1255	0.11	3.45	4.97102	3.96396e-06	7.33018e-06	Up	NA	NA	NA	NA	gi|345561500|gb|EGX44589.1|//hypothetical protein AOL_s00188g257 [Arthrobotrys oligospora ATCC 24927]
AOL_s00078g507	897	0.23	7.17	4.96227	9.1059e-09	1.92792e-08	Up	NA	NA	NA	NA	gi|345566531|gb|EGX49474.1|//hypothetical protein AOL_s00078g507 [Arthrobotrys oligospora ATCC 24927]
AOL_s00004g208	1997	0.33	10.27	4.95983	2.03126e-42	9.66378e-42	Up	NA	NA	NA	K05989//alpha-L-rhamnosidase [EC:3.2.1.40]	gi|345571361|gb|EGX54175.1|//hypothetical protein AOL_s00004g208 [Arthrobotrys oligospora ATCC 24927]
AOL_s00215g240	1487	0.26	8.08	4.95777	3.08386e-16	8.49588e-16	Up	NA	NA	NA	NA	gi|345560379|gb|EGX43504.1|//hypothetical protein AOL_s00215g240 [Arthrobotrys oligospora ATCC 24927]
AOL_s00004g90	1061	2.36	72.6	4.94311	1.82221e-139	2.21133e-138	Up	NA	GO:0003824//catalytic activity	NA	K01426//amidase [EC:3.5.1.4]	gi|345571243|gb|EGX54057.1|//hypothetical protein AOL_s00004g90 [Arthrobotrys oligospora ATCC 24927]
AOL_s00109g46	4942	0.2	6.14	4.94017	4.31644e-31	1.67762e-30	Up	NA	NA	GO:0008152//metabolic process	K00010//myo-inositol 2-dehydrogenase / D-chiro-inositol 1-dehydrogenase [EC:1.1.1.18 1.1.1.369];K00540	gi|345563474|gb|EGX46474.1|//hypothetical protein AOL_s00109g46 [Arthrobotrys oligospora ATCC 24927]
AOL_s00054g905	443	0.24	7.33	4.93271	1.79693e-08	3.7525e-08	Up	NA	NA	NA	K03685//ribonuclease III [EC:3.1.26.3]	gi|526205401|gb|EPS45551.1|//hypothetical protein H072_445 [Dactylellina haptotyla CBS 200.50];gi|345567917|gb|EGX50819.1|//hypothetical protein AOL_s00054g905 [Arthrobotrys oligospora ATCC 24927]
AOL_s00054g686	1851	0.2	6.03	4.91409	5.95014e-24	2.01071e-23	Up	GO:0043231//intracellular membrane-bounded organelle;GO:0005634//nucleus	NA	GO:0006260//DNA replication;GO:0006259//DNA metabolic process	K10734//GINS complex subunit 3	gi|345568049|gb|EGX50950.1|//hypothetical protein AOL_s00054g686 [Arthrobotrys oligospora ATCC 24927]
AOL_s00173g196	371	1.14	34.21	4.90731	5.32636e-95	4.6481e-94	Up	NA	NA	NA	K17862//linoleate 10R-lipoxygenase [EC:1.13.11.62];K00777	gi|345562023|gb|EGX45095.1|//hypothetical protein AOL_s00173g196 [Arthrobotrys oligospora ATCC 24927]
AOL_s00176g32	1377	0.27	8.05	4.89796	7.83368e-14	2.00356e-13	Up	NA	NA	NA	K00924	gi|345561786|gb|EGX44861.1|//hypothetical protein AOL_s00176g32 [Arthrobotrys oligospora ATCC 24927]
AOL_s00097g209	825	1.02	30.21	4.88839	1.8183e-30	6.97389e-30	Up	NA	NA	NA	K08900//mitochondrial chaperone BCS1	gi|345563988|gb|EGX46970.1|//hypothetical protein AOL_s00097g209 [Arthrobotrys oligospora ATCC 24927]
AOL_s00097g294	509	1.39	41.12	4.88668	1.17227e-23	3.9414e-23	Up	NA	GO:0043169//cation binding;GO:0046872//metal ion binding;GO:0003824//catalytic activity;GO:0016798//hydrolase activity, acting on glycosyl bonds	GO:0044238//primary metabolic process	K01176//alpha-amylase [EC:3.2.1.1]	gi|345563885|gb|EGX46868.1|//hypothetical protein AOL_s00097g294 [Arthrobotrys oligospora ATCC 24927]
AOL_s00080g129	446	12.05	356.15	4.88538	1.09693e-164	1.54432e-163	Up	NA	GO:0016671//oxidoreductase activity, acting on a sulfur group of donors, disulfide as acceptor	GO:0043170//macromolecule metabolic process	K07304//peptide-methionine (S)-S-oxide reductase [EC:1.8.4.11]	gi|345565551|gb|EGX48500.1|//hypothetical protein AOL_s00080g129 [Arthrobotrys oligospora ATCC 24927]
AOL_s00110g261	1069	20.89	615.87	4.88174	0	0	Up	NA	NA	NA	K04487//cysteine desulfurase [EC:2.8.1.7]	gi|345563093|gb|EGX46097.1|//hypothetical protein AOL_s00110g261 [Arthrobotrys oligospora ATCC 24927]
AOL_s00080g220	939	0.44	12.93	4.87707	1.19678e-15	3.23868e-15	Up	NA	NA	NA	K15110//solute carrier family 25 (mitochondrial 2-oxodicarboxylate transporter), member 21;K02155//V-type H+-transporting ATPase 16kDa proteolipid subunit;K00777	gi|345565642|gb|EGX48591.1|//hypothetical protein AOL_s00080g220 [Arthrobotrys oligospora ATCC 24927]
AOL_s00075g52	3249	0.17	4.99	4.87543	4.61134e-23	1.52782e-22	Up	NA	NA	NA	NA	gi|345567698|gb|EGX50626.1|//hypothetical protein AOL_s00075g52 [Arthrobotrys oligospora ATCC 24927]
AOL_s00081g249	2110	0.07	2.05	4.87213	1.79693e-08	3.75165e-08	Up	NA	NA	NA	NA	gi|345564966|gb|EGX47922.1|//hypothetical protein AOL_s00081g249 [Arthrobotrys oligospora ATCC 24927]
AOL_s00097g96	1384	0.69	20.13	4.86661	1.62984e-50	8.80076e-50	Up	NA	NA	NA	K11971//E3 ubiquitin-protein ligase RNF14 [EC:2.3.2.27];K11968//ariadne-1 [EC:2.3.2.27]	gi|345564069|gb|EGX47050.1|//hypothetical protein AOL_s00097g96 [Arthrobotrys oligospora ATCC 24927]
AOL_s00054g259	2590	1.31	38.05	4.86026	9.51528e-131	1.09349e-129	Up	NA	NA	NA	K03006//DNA-directed RNA polymerase II subunit RPB1 [EC:2.7.7.6];K03260//translation initiation factor 4G;K12879//THO complex subunit 2	gi|345568667|gb|EGX51560.1|//hypothetical protein AOL_s00054g259 [Arthrobotrys oligospora ATCC 24927]
AOL_s00079g118	2469	21.45	620.62	4.85466	0	0	Up	NA	NA	NA	K06875//programmed cell death protein 5;K01759//lactoylglutathione lyase [EC:4.4.1.5]	gi|345565950|gb|EGX48897.1|//hypothetical protein AOL_s00079g118 [Arthrobotrys oligospora ATCC 24927]
AOL_s00080g285	2476	2.45	70.73	4.85147	2.27624e-200	3.84322e-199	Up	GO:0031224//intrinsic component of membrane	GO:0015405//P-P-bond-hydrolysis-driven transmembrane transporter activity;GO:0032559//adenyl ribonucleotide binding;GO:0017111//nucleoside-triphosphatase activity	GO:0051234//establishment of localization;GO:0009207//purine ribonucleoside triphosphate catabolic process	K08712//ATP-binding cassette, subfamily G (WHITE), member 2, SNQ2	gi|345565707|gb|EGX48656.1|//hypothetical protein AOL_s00080g285 [Arthrobotrys oligospora ATCC 24927]
AOL_s00043g279	1829	0.32	9.23	4.85019	1.75978e-22	5.76895e-22	Up	NA	NA	NA	K10675//cyanide hydratase [EC:4.2.1.66]	gi|345569624|gb|EGX52490.1|//hypothetical protein AOL_s00043g279 [Arthrobotrys oligospora ATCC 24927]
AOL_s00173g44	2659	0.14	4.01	4.8401	7.57706e-12	1.81258e-11	Up	GO:0016020//membrane	NA	GO:0006810//transport	K01952//phosphoribosylformylglycinamidine synthase [EC:6.3.5.3];K16066//3-hydroxy acid dehydrogenase / malonic semialdehyde reductase [EC:1.1.1.381 1.1.1.-];K13095//splicing factor 1;K10866//DNA repair protein RAD50 [EC:3.6.-.-];K14708//solute carrier family 26 (sodium-independent sulfate anion transporter), member 11	gi|345561871|gb|EGX44943.1|//hypothetical protein AOL_s00173g44 [Arthrobotrys oligospora ATCC 24927]
AOL_s00083g242	1181	1.02	29.2	4.83933	3.57734e-43	1.72126e-42	Up	GO:0044424//intracellular part	NA	NA	K12757//myosin regulatory light chain 12	gi|345564774|gb|EGX47734.1|//hypothetical protein AOL_s00083g242 [Arthrobotrys oligospora ATCC 24927]
AOL_s00210g152	5363	1.15	32.49	4.82029	1.22539e-121	1.32183e-120	Up	NA	GO:0016787//hydrolase activity	GO:0005975//carbohydrate metabolic process	K19357//cellulase [EC:3.2.1.4]	gi|345560875|gb|EGX43992.1|//hypothetical protein AOL_s00210g153 [Arthrobotrys oligospora ATCC 24927];gi|345560874|gb|EGX43991.1|//hypothetical protein AOL_s00210g152 [Arthrobotrys oligospora ATCC 24927]
AOL_s00054g968	7497	1.24	34.73	4.80777	2.3801e-132	2.75902e-131	Up	NA	NA	NA	K00505//tyrosinase [EC:1.14.18.1]	gi|345567980|gb|EGX50882.1|//hypothetical protein AOL_s00054g968 [Arthrobotrys oligospora ATCC 24927]
AOL_s00079g251	1777	0.09	2.51	4.80162	7.73044e-06	1.40252e-05	Up	NA	NA	NA	NA	gi|345566083|gb|EGX49030.1|//hypothetical protein AOL_s00079g251 [Arthrobotrys oligospora ATCC 24927]
AOL_s00097g196	520	14.89	412.59	4.79229	1.2599e-242	2.63871e-241	Up	NA	NA	NA	NA	gi|345564169|gb|EGX47150.1|//hypothetical protein AOL_s00097g196 [Arthrobotrys oligospora ATCC 24927]
AOL_s00097g522	773	0.51	14.13	4.79212	3.0887e-16	8.5067e-16	Up	NA	NA	NA	K03241//translation initiation factor eIF-2B subunit gamma	gi|345563632|gb|EGX46618.1|//hypothetical protein AOL_s00097g522 [Arthrobotrys oligospora ATCC 24927]
AOL_s00006g548	3119	0.93	25.68	4.78727	1.57509e-99	1.42109e-98	Up	NA	GO:0005488//binding	NA	K15110//solute carrier family 25 (mitochondrial 2-oxodicarboxylate transporter), member 21;K02155//V-type H+-transporting ATPase 16kDa proteolipid subunit;K00777;K03255//protein TIF31	gi|345570347|gb|EGX53170.1|//hypothetical protein AOL_s00006g548 [Arthrobotrys oligospora ATCC 24927]
AOL_s00006g385	1385	0.42	11.58	4.7851	1.47931e-20	4.61882e-20	Up	NA	NA	NA	K10436//microtubule-associated protein, RP/EB family	gi|345570698|gb|EGX53519.1|//hypothetical protein AOL_s00006g385 [Arthrobotrys oligospora ATCC 24927]
AOL_s00076g153	1281	0.31	8.53	4.78221	1.79036e-14	4.67399e-14	Up	NA	NA	NA	NA	gi|345567457|gb|EGX50389.1|//hypothetical protein AOL_s00076g153 [Arthrobotrys oligospora ATCC 24927]
AOL_s00043g444	3235	0.53	14.58	4.78185	3.5684e-20	1.10307e-19	Up	NA	NA	NA	K01183//chitinase [EC:3.2.1.14]	gi|345569186|gb|EGX52054.1|//hypothetical protein AOL_s00043g444 [Arthrobotrys oligospora ATCC 24927]
AOL_s00083g308	1485	1.52	41.59	4.77409	6.33968e-112	6.25909e-111	Up	NA	NA	NA	K12857//Prp8 binding protein;K14556//U3 small nucleolar RNA-associated protein 12;K00777;K14963//COMPASS component SWD3;K14855//ribosome assembly protein 4	gi|345564538|gb|EGX47499.1|//hypothetical protein AOL_s00083g308 [Arthrobotrys oligospora ATCC 24927]
AOL_s00193g145	3183	1.59	43.17	4.76293	1.76497e-152	2.33658e-151	Up	NA	NA	NA	K03363//cell division cycle 20, cofactor of APC complex	gi|345561321|gb|EGX44417.1|//hypothetical protein AOL_s00193g145 [Arthrobotrys oligospora ATCC 24927]
AOL_s00004g197	2274	0.25	6.76	4.75702	8.34464e-18	2.41154e-17	Up	NA	NA	NA	K11430//histone-lysine N-methyltransferase EZH2 [EC:2.1.1.43]	gi|345571350|gb|EGX54164.1|//hypothetical protein AOL_s00004g197 [Arthrobotrys oligospora ATCC 24927]
AOL_s00054g87	2502	3.44	93	4.75675	1.24787e-222	2.39303e-221	Up	NA	GO:0046872//metal ion binding;GO:0016868//intramolecular transferase activity, phosphotransferases	GO:0044238//primary metabolic process	K01836//phosphoacetylglucosamine mutase [EC:5.4.2.3]	gi|345568796|gb|EGX51688.1|//hypothetical protein AOL_s00054g87 [Arthrobotrys oligospora ATCC 24927]
AOL_s00097g452	3051	0.12	3.24	4.75489	1.93588e-11	4.56885e-11	Up	NA	GO:0005488//binding	NA	K10877//DNA repair and recombination protein RAD54B [EC:3.6.4.-]	gi|345563719|gb|EGX46704.1|//hypothetical protein AOL_s00097g452 [Arthrobotrys oligospora ATCC 24927]
AOL_s00004g79	2700	1.19	32.12	4.75444	7.45882e-142	9.14687e-141	Up	NA	GO:0016787//hydrolase activity;GO:0005524//ATP binding;GO:0000166//nucleotide binding;GO:0016462//pyrophosphatase activity;GO:0032559//adenyl ribonucleotide binding	NA	K00469//inositol oxygenase [EC:1.13.99.1];K03062//26S proteasome regulatory subunit T2;K12586//exosome complex component RRP43	gi|345571232|gb|EGX54046.1|//hypothetical protein AOL_s00004g79 [Arthrobotrys oligospora ATCC 24927]
AOL_s00173g166	1374	0.19	5.12	4.75207	5.1926e-13	1.29329e-12	Up	NA	NA	NA	K05692//actin beta/gamma 1;K00777;K14855//ribosome assembly protein 4	gi|345561993|gb|EGX45065.1|//hypothetical protein AOL_s00173g166 [Arthrobotrys oligospora ATCC 24927]
AOL_s00054g749	4492	11.31	304.36	4.75011	0	0	Up	GO:0005737//cytoplasm	GO:0016616//oxidoreductase activity, acting on the CH-OH group of donors, NAD or NADP as acceptor;GO:0050662//coenzyme binding	GO:0006072//glycerol-3-phosphate metabolic process	K00006//glycerol-3-phosphate dehydrogenase (NAD+) [EC:1.1.1.8]	gi|345568111|gb|EGX51012.1|//hypothetical protein AOL_s00054g748 [Arthrobotrys oligospora ATCC 24927];gi|345568112|gb|EGX51013.1|//hypothetical protein AOL_s00054g749 [Arthrobotrys oligospora ATCC 24927]
AOL_s00188g331	2352	2.69	71.98	4.74192	2.68898e-235	5.41281e-234	Up	NA	NA	NA	NA	gi|345561336|gb|EGX44426.1|//hypothetical protein AOL_s00188g331 [Arthrobotrys oligospora ATCC 24927]
AOL_s00117g30	846	0.25	6.64	4.73118	1.37243e-07	2.74427e-07	Up	NA	NA	NA	NA	gi|345562812|gb|EGX45825.1|//hypothetical protein AOL_s00117g30 [Arthrobotrys oligospora ATCC 24927]
AOL_s00007g293	3734	0.71	18.81	4.72754	6.26356e-91	5.31177e-90	Up	NA	NA	NA	K04564//superoxide dismutase, Fe-Mn family [EC:1.15.1.1]	gi|345570132|gb|EGX52957.1|//hypothetical protein AOL_s00007g293 [Arthrobotrys oligospora ATCC 24927]
AOL_s00080g126	484	0.68	17.98	4.72471	1.51504e-10	3.44984e-10	Up	NA	GO:0004527//exonuclease activity	NA	K11600//exosome complex component RRP41	gi|345565548|gb|EGX48497.1|//hypothetical protein AOL_s00080g126 [Arthrobotrys oligospora ATCC 24927]
AOL_s00215g512	1078	1.05	27.68	4.72038	4.51196e-24	1.52803e-23	Up	NA	NA	NA	NA	gi|345560651|gb|EGX43776.1|//hypothetical protein AOL_s00215g512 [Arthrobotrys oligospora ATCC 24927]
AOL_s00076g547	2472	1.01	26.57	4.71737	7.1811e-84	5.68631e-83	Up	NA	NA	NA	NA	gi|345566968|gb|EGX49906.1|//hypothetical protein AOL_s00076g547 [Arthrobotrys oligospora ATCC 24927]
AOL_s00210g382	1098	0.74	19.44	4.71536	1.17822e-26	4.21858e-26	Up	NA	NA	NA	NA	gi|345560816|gb|EGX43935.1|//hypothetical protein AOL_s00210g382 [Arthrobotrys oligospora ATCC 24927]
AOL_s00215g282	1953	9.27	243.42	4.71473	0	0	Up	NA	GO:0046872//metal ion binding;GO:0005506//iron ion binding;GO:0016491//oxidoreductase activity	NA	K17827//fumitremorgin C synthase [EC:1.14.21.10];K00517;K17651//aflatoxin B synthase [EC:1.14.13.175];K10437//phenylacetate 2-hydroxylase [EC:1.14.13.-];K10438//3-hydroxyphenylacetate 6-hydroxylase [EC:1.14.13.63]	gi|345560421|gb|EGX43546.1|//hypothetical protein AOL_s00215g282 [Arthrobotrys oligospora ATCC 24927]
AOL_s00210g203	1469	2.73	70.94	4.69963	2.17206e-169	3.14342e-168	Up	NA	NA	NA	K14575//AAA family ATPase;K00469//inositol oxygenase [EC:1.13.99.1]	gi|345560925|gb|EGX44042.1|//hypothetical protein AOL_s00210g203 [Arthrobotrys oligospora ATCC 24927]
AOL_s00043g812	687	1.03	26.64	4.69288	6.80266e-22	2.20371e-21	Up	NA	NA	NA	NA	gi|345568923|gb|EGX51793.1|//hypothetical protein AOL_s00043g812 [Arthrobotrys oligospora ATCC 24927]
AOL_s00081g54	1026	0.2	5.14	4.6837	2.69662e-07	5.3011e-07	Up	NA	NA	NA	NA	gi|345565239|gb|EGX48191.1|//hypothetical protein AOL_s00081g54 [Arthrobotrys oligospora ATCC 24927]
AOL_s00210g31	1007	1.7	43.53	4.6784	2.01434e-57	1.18371e-56	Up	NA	NA	NA	NA	gi|345561044|gb|EGX44159.1|//hypothetical protein AOL_s00210g31 [Arthrobotrys oligospora ATCC 24927]
AOL_s00043g378	1857	0.29	7.38	4.6695	1.70148e-11	4.02379e-11	Up	NA	NA	NA	NA	gi|345569368|gb|EGX52235.1|//hypothetical protein AOL_s00043g378 [Arthrobotrys oligospora ATCC 24927]
AOL_s00004g563	199	1.9	48.27	4.66706	1.37243e-07	2.74545e-07	Up	NA	NA	NA	NA	gi|345571089|gb|EGX53904.1|//hypothetical protein AOL_s00004g563 [Arthrobotrys oligospora ATCC 24927]
AOL_s00004g490	3044	0.16	4.06	4.66534	6.96618e-37	3.02398e-36	Up	NA	NA	NA	NA	gi|345571016|gb|EGX53831.1|//hypothetical protein AOL_s00004g490 [Arthrobotrys oligospora ATCC 24927]
AOL_s00080g361	1856	8.12	205.84	4.6639	0	0	Up	NA	NA	NA	NA	gi|345565285|gb|EGX48236.1|//hypothetical protein AOL_s00080g361 [Arthrobotrys oligospora ATCC 24927]
AOL_s00215g238	2505	0.38	9.62	4.66197	1.50957e-11	3.5836e-11	Up	NA	NA	NA	NA	gi|345560377|gb|EGX43502.1|//hypothetical protein AOL_s00215g238 [Arthrobotrys oligospora ATCC 24927]
BGI_novel_G000030	1231	0.16	4.03	4.65464	5.29164e-07	1.02426e-06	Up	NA	NA	NA	NA	gi|345562666|gb|EGX45702.1|//hypothetical protein AOL_s00140g18 [Arthrobotrys oligospora ATCC 24927]
AOL_s00210g104	1234	0.16	4.02	4.65105	5.29164e-07	1.02405e-06	Up	NA	NA	NA	NA	gi|345561007|gb|EGX44123.1|//hypothetical protein AOL_s00210g104 [Arthrobotrys oligospora ATCC 24927]
AOL_s00080g412	2935	29.21	733.14	4.64955	0	0	Up	NA	NA	NA	K11244//cell wall integrity and stress response component;K08254//glucan endo-1,3-alpha-glucosidase [EC:3.2.1.59]	gi|345565336|gb|EGX48287.1|//hypothetical protein AOL_s00080g412 [Arthrobotrys oligospora ATCC 24927]
AOL_s00215g508	3401	0.22	5.49	4.64123	4.95608e-24	1.67783e-23	Up	NA	NA	NA	NA	gi|345560647|gb|EGX43772.1|//hypothetical protein AOL_s00215g508 [Arthrobotrys oligospora ATCC 24927]
AOL_s00097g347	1719	0.51	12.66	4.63364	3.67516e-33	1.49053e-32	Up	GO:0016020//membrane	GO:0046872//metal ion binding;GO:0046914//transition metal ion binding;GO:0003824//catalytic activity;GO:0016491//oxidoreductase activity	GO:0008152//metabolic process	K03107//signal recognition particle subunit SRP68;K00540	gi|345563938|gb|EGX46921.1|//hypothetical protein AOL_s00097g347 [Arthrobotrys oligospora ATCC 24927]
AOL_s00083g385	3831	4.35	107.93	4.63294	1.60238e-216	2.94559e-215	Up	NA	GO:0003824//catalytic activity	GO:0008152//metabolic process	K00540;K04125//gibberellin 2-oxidase [EC:1.14.11.13]	gi|345564487|gb|EGX47449.1|//hypothetical protein AOL_s00083g385 [Arthrobotrys oligospora ATCC 24927]
AOL_s00109g104	594	0.75	18.55	4.62838	5.1926e-13	1.29295e-12	Up	NA	NA	NA	K09788//uncharacterized protein	gi|345563532|gb|EGX46532.1|//hypothetical protein AOL_s00109g104 [Arthrobotrys oligospora ATCC 24927]
AOL_s00006g358	993	4.54	111.88	4.62312	3.63222e-130	4.15366e-129	Up	NA	NA	NA	NA	gi|345570671|gb|EGX53492.1|//hypothetical protein AOL_s00006g358 [Arthrobotrys oligospora ATCC 24927]
AOL_s00078g516	4540	1.48	36.29	4.6159	3.42752e-193	5.6942e-192	Up	NA	NA	NA	K00777	gi|345566540|gb|EGX49483.1|//hypothetical protein AOL_s00078g516 [Arthrobotrys oligospora ATCC 24927]
AOL_s00054g956	449	31.25	760.28	4.6046	0	0	Up	GO:0044424//intracellular part	GO:0004457//lactate dehydrogenase activity;GO:0003824//catalytic activity	GO:0008152//metabolic process;GO:0006007//glucose catabolic process	K00016//L-lactate dehydrogenase [EC:1.1.1.27]	gi|345567968|gb|EGX50870.1|//hypothetical protein AOL_s00054g956 [Arthrobotrys oligospora ATCC 24927]
AOL_s00081g82	3073	1.87	45.28	4.59776	5.25516e-294	1.31662e-292	Up	NA	NA	NA	K01183//chitinase [EC:3.2.1.14]	gi|345565133|gb|EGX48086.1|//hypothetical protein AOL_s00081g82 [Arthrobotrys oligospora ATCC 24927]
AOL_s00170g50	3794	4.22	101.72	4.59122	0	0	Up	GO:0044464//cell part	GO:0046873//metal ion transmembrane transporter activity	GO:0034220//ion transmembrane transport;GO:0030001//metal ion transport	K03549//KUP system potassium uptake protein	gi|345562274|gb|EGX45343.1|//hypothetical protein AOL_s00170g50 [Arthrobotrys oligospora ATCC 24927]
AOL_s00079g440	1261	0.16	3.85	4.58871	1.50472e-05	2.68608e-05	Up	NA	GO:0016787//hydrolase activity;GO:0032559//adenyl ribonucleotide binding;GO:0016884//carbon-nitrogen ligase activity, with glutamine as amido-N-donor;GO:0003824//catalytic activity	GO:0019359//nicotinamide nucleotide biosynthetic process	K01950//NAD+ synthase (glutamine-hydrolysing) [EC:6.3.5.1]	gi|345565853|gb|EGX48801.1|//hypothetical protein AOL_s00079g440 [Arthrobotrys oligospora ATCC 24927]
AOL_s00079g354	4968	3.46	83.13	4.58653	5.7518e-252	1.24378e-250	Up	GO:0042579//microbody	GO:0046872//metal ion binding;GO:0008131//primary amine oxidase activity;GO:0016641//oxidoreductase activity, acting on the CH-NH2 group of donors, oxygen as acceptor;GO:0005507//copper ion binding;GO:0046914//transition metal ion binding;GO:0048037//cofactor binding;GO:0048038//quinone binding;GO:0016491//oxidoreductase activity	GO:0006807//nitrogen compound metabolic process;GO:0008152//metabolic process;GO:0009308//amine metabolic process;GO:0055114//oxidation-reduction process	K00276//primary-amine oxidase [EC:1.4.3.21]	gi|345565767|gb|EGX48715.1|//hypothetical protein AOL_s00079g354 [Arthrobotrys oligospora ATCC 24927]
AOL_s00215g727	879	0.24	5.76	4.58496	7.73044e-06	1.40225e-05	Up	NA	NA	NA	NA	gi|345559988|gb|EGX43118.1|//hypothetical protein AOL_s00215g727 [Arthrobotrys oligospora ATCC 24927]
AOL_s00080g198	2101	0.57	13.54	4.57012	5.32612e-42	2.51212e-41	Up	NA	NA	NA	K09468//zinc finger protein MSN2/4	gi|345565620|gb|EGX48569.1|//hypothetical protein AOL_s00080g198 [Arthrobotrys oligospora ATCC 24927]
AOL_s00215g295	2654	0.79	18.75	4.56889	8.72756e-50	4.6587e-49	Up	NA	GO:0016740//transferase activity;GO:0048037//cofactor binding	GO:0008152//metabolic process	K00838//aromatic amino acid aminotransferase I [EC:2.6.1.57 2.6.1.27 2.6.1.5]	gi|345560434|gb|EGX43559.1|//hypothetical protein AOL_s00215g295 [Arthrobotrys oligospora ATCC 24927]
AOL_s00006g589	4138	0.14	3.3	4.55897	8.3267e-10	1.84203e-09	Up	NA	NA	NA	NA	gi|345570388|gb|EGX53211.1|//hypothetical protein AOL_s00006g589 [Arthrobotrys oligospora ATCC 24927]
AOL_s00210g257	2258	1.87	44.06	4.55836	1.80755e-121	1.94083e-120	Up	NA	NA	NA	K01952//phosphoribosylformylglycinamidine synthase [EC:6.3.5.3];K08197//MFS transporter, SIT family, siderophore-iron:H+ symporter;K13095//splicing factor 1;K10866//DNA repair protein RAD50 [EC:3.6.-.-];K14708//solute carrier family 26 (sodium-independent sulfate anion transporter), member 11	gi|345560979|gb|EGX44096.1|//hypothetical protein AOL_s00210g257 [Arthrobotrys oligospora ATCC 24927]
AOL_s00054g753	2508	0.3	7	4.54432	5.3191e-22	1.72611e-21	Up	NA	NA	NA	NA	gi|345568116|gb|EGX51017.1|//hypothetical protein AOL_s00054g753 [Arthrobotrys oligospora ATCC 24927]
AOL_s00054g283	1051	0.18	4.16	4.53051	1.37243e-07	2.74486e-07	Up	NA	NA	NA	NA	gi|345568691|gb|EGX51584.1|//hypothetical protein AOL_s00054g283 [Arthrobotrys oligospora ATCC 24927]
AOL_s00043g287	3425	4.58	105.7	4.52848	3.40566e-169	4.91343e-168	Up	NA	GO:0003824//catalytic activity;GO:0016740//transferase activity	NA	K16231//fungal type III polyketide synthase	gi|345569632|gb|EGX52498.1|//hypothetical protein AOL_s00043g287 [Arthrobotrys oligospora ATCC 24927]
AOL_s00080g262	1593	1.11	25.58	4.52638	4.23422e-50	2.2719e-49	Up	NA	GO:0003824//catalytic activity	GO:0008152//metabolic process	NA	gi|345565684|gb|EGX48633.1|//hypothetical protein AOL_s00080g262 [Arthrobotrys oligospora ATCC 24927]
AOL_s00080g150	1515	0.23	5.3	4.52629	5.60524e-11	1.30114e-10	Up	NA	NA	NA	NA	gi|345565572|gb|EGX48521.1|//hypothetical protein AOL_s00080g150 [Arthrobotrys oligospora ATCC 24927]
AOL_s00004g21	2020	1.4	32.21	4.52401	2.7552e-83	2.16879e-82	Up	NA	NA	NA	NA	gi|345571559|gb|EGX54372.1|//hypothetical protein AOL_s00004g21 [Arthrobotrys oligospora ATCC 24927]
AOL_s00215g268	2658	2.82	64.67	4.51933	9.20918e-147	1.17253e-145	Up	NA	NA	NA	NA	gi|345560407|gb|EGX43532.1|//hypothetical protein AOL_s00215g268 [Arthrobotrys oligospora ATCC 24927];gi|345560406|gb|EGX43531.1|//hypothetical protein AOL_s00215g267 [Arthrobotrys oligospora ATCC 24927]
AOL_s00054g552	3204	0.18	4.1	4.50956	1.62845e-17	4.66271e-17	Up	NA	NA	NA	K10380//ankyrin;K08803//death-associated protein kinase [EC:2.7.11.1];K16261//yeast amino acid transporter;K16726//ankyrin repeat domain-containing protein 17	gi|345568279|gb|EGX51176.1|//hypothetical protein AOL_s00054g552 [Arthrobotrys oligospora ATCC 24927];gi|526197795|gb|EPS39024.1|//hypothetical protein H072_7207 [Dactylellina haptotyla CBS 200.50]
AOL_s00054g368	1878	0.31	7.05	4.50728	3.17602e-17	9.01355e-17	Up	NA	GO:0032559//adenyl ribonucleotide binding;GO:0004672//protein kinase activity;GO:0016301//kinase activity	GO:0006464//cellular protein modification process	K02214//cell division control protein 7 [EC:2.7.11.1]	gi|345568404|gb|EGX51298.1|//hypothetical protein AOL_s00054g368 [Arthrobotrys oligospora ATCC 24927]
AOL_s00080g441	531	3.87	87.81	4.50398	3.13148e-49	1.66204e-48	Up	NA	NA	NA	K03469//ribonuclease HI [EC:3.1.26.4]	gi|345565365|gb|EGX48316.1|//hypothetical protein AOL_s00080g441 [Arthrobotrys oligospora ATCC 24927]
AOL_s00176g72	1023	0.3	6.78	4.49825	7.71498e-17	2.16121e-16	Up	NA	NA	NA	NA	gi|345561714|gb|EGX44790.1|//hypothetical protein AOL_s00176g72 [Arthrobotrys oligospora ATCC 24927]
AOL_s00173g12	3091	1.7	38.31	4.49411	2e-306	5.17778e-305	Up	NA	NA	NA	K05692//actin beta/gamma 1;K00777;K14855//ribosome assembly protein 4	gi|345561839|gb|EGX44911.1|//hypothetical protein AOL_s00173g12 [Arthrobotrys oligospora ATCC 24927]
AOL_s00054g258	1443	0.27	6.08	4.49304	1.47777e-11	3.50899e-11	Up	NA	NA	NA	K06974//archaemetzincin [EC:3.4.-.-]	gi|345568666|gb|EGX51559.1|//hypothetical protein AOL_s00054g258 [Arthrobotrys oligospora ATCC 24927]
AOL_s00097g126	1915	10.78	242.34	4.4906	0	0	Up	NA	NA	GO:0051188//cofactor biosynthetic process;GO:0090407//organophosphate biosynthetic process;GO:0042559//pteridine-containing compound biosynthetic process;GO:0006732//coenzyme metabolic process;GO:0018130//heterocycle biosynthetic process;GO:0043545//molybdopterin cofactor metabolic process;GO:1901566//organonitrogen compound biosynthetic process;GO:1901362//organic cyclic compound biosynthetic pr…	K15376//gephyrin [EC:2.10.1.1 2.7.7.75]	gi|345564099|gb|EGX47080.1|//hypothetical protein AOL_s00097g126 [Arthrobotrys oligospora ATCC 24927]
AOL_s00079g59	728	8.06	180.88	4.48811	2.14152e-147	2.7341e-146	Up	NA	NA	NA	K01183//chitinase [EC:3.2.1.14]	gi|345566159|gb|EGX49105.1|//hypothetical protein AOL_s00079g59 [Arthrobotrys oligospora ATCC 24927]
AOL_s00054g222	1743	0.49	10.98	4.48595	6.05728e-31	2.34443e-30	Up	NA	NA	NA	NA	gi|345568630|gb|EGX51523.1|//hypothetical protein AOL_s00054g222 [Arthrobotrys oligospora ATCC 24927]
AOL_s00080g145	1857	0.6	13.4	4.48113	3.84022e-64	2.45143e-63	Up	GO:0015630//microtubule cytoskeleton	GO:0032559//adenyl ribonucleotide binding;GO:0000166//nucleotide binding;GO:0003774//motor activity;GO:0005488//binding	GO:0007017//microtubule-based process	K10401//kinesin family member 18/19	gi|345565567|gb|EGX48516.1|//hypothetical protein AOL_s00080g145 [Arthrobotrys oligospora ATCC 24927]
AOL_s00210g100	3412	1.17	26.09	4.47892	7.47714e-57	4.35816e-56	Up	GO:0016020//membrane	GO:0004620//phospholipase activity	GO:0016042//lipid catabolic process;GO:0008152//metabolic process	K16342//cytosolic phospholipase A2 [EC:3.1.1.4]	gi|345561003|gb|EGX44119.1|//hypothetical protein AOL_s00210g100 [Arthrobotrys oligospora ATCC 24927]
AOL_s00078g352	3939	0.48	10.62	4.46761	4.20414e-53	2.34626e-52	Up	NA	NA	NA	NA	gi|345566376|gb|EGX49319.1|//hypothetical protein AOL_s00078g352 [Arthrobotrys oligospora ATCC 24927]
AOL_s00007g200	512	1.06	23.27	4.45634	1.35303e-13	3.43228e-13	Up	NA	GO:0016701//oxidoreductase activity, acting on single donors with incorporation of molecular oxygen;GO:0016491//oxidoreductase activity	GO:0008152//metabolic process	K03119//taurine dioxygenase [EC:1.14.11.17];K19245//sulfonate dioxygenase [EC:1.14.11.-]	gi|345570039|gb|EGX52864.1|//hypothetical protein AOL_s00007g200 [Arthrobotrys oligospora ATCC 24927]
AOL_s00215g876	930	0.89	19.49	4.45278	1.03544e-21	3.33344e-21	Up	NA	NA	NA	K00140//malonate-semialdehyde dehydrogenase (acetylating) / methylmalonate-semialdehyde dehydrogenase [EC:1.2.1.18 1.2.1.27]	gi|345559795|gb|EGX42927.1|//hypothetical protein AOL_s00215g876 [Arthrobotrys oligospora ATCC 24927]
AOL_s00075g4	3196	0.9	19.68	4.45066	2.63786e-58	1.57092e-57	Up	NA	NA	NA	NA	gi|345567650|gb|EGX50578.1|//hypothetical protein AOL_s00075g4 [Arthrobotrys oligospora ATCC 24927]
AOL_s00097g552	624	0.35	7.65	4.45003	3.96396e-06	7.33163e-06	Up	NA	NA	NA	NA	gi|345563662|gb|EGX46648.1|//hypothetical protein AOL_s00097g552 [Arthrobotrys oligospora ATCC 24927]
AOL_s00076g654	806	21.92	477.98	4.44663	0	0	Up	NA	NA	NA	K00860//adenylylsulfate kinase [EC:2.7.1.25]	gi|345566917|gb|EGX49856.1|//hypothetical protein AOL_s00076g654 [Arthrobotrys oligospora ATCC 24927]
AOL_s00173g394	4438	0.47	10.22	4.44259	4.51416e-46	2.2915e-45	Up	NA	NA	NA	K19626//inversin;K15110//solute carrier family 25 (mitochondrial 2-oxodicarboxylate transporter), member 21;K15503//serine/threonine-protein phosphatase 6 regulatory ankyrin repeat subunit B;K02155//V-type H+-transporting ATPase 16kDa proteolipid subunit;K00777	gi|345562221|gb|EGX45293.1|//hypothetical protein AOL_s00173g394 [Arthrobotrys oligospora ATCC 24927]
AOL_s00054g230	5228	0.1	2.17	4.43962	6.07674e-16	1.65697e-15	Up	NA	NA	NA	NA	gi|345568638|gb|EGX51531.1|//hypothetical protein AOL_s00054g230 [Arthrobotrys oligospora ATCC 24927];gi|345568637|gb|EGX51530.1|//hypothetical protein AOL_s00054g229 [Arthrobotrys oligospora ATCC 24927]
AOL_s00140g26	1773	0.22	4.77	4.43841	2.87946e-11	6.76666e-11	Up	NA	NA	NA	NA	gi|345562674|gb|EGX45710.1|//hypothetical protein AOL_s00140g26 [Arthrobotrys oligospora ATCC 24927]
AOL_s00097g163	3367	1.03	22.32	4.43762	1.79858e-72	1.2699e-71	Up	NA	NA	NA	K11238//cytokinesis protein;K11095//U1 small nuclear ribonucleoprotein C;K12609//CCR4-NOT transcriptional complex subunit CAF120	gi|345564136|gb|EGX47117.1|//hypothetical protein AOL_s00097g163 [Arthrobotrys oligospora ATCC 24927]
AOL_s00215g899	968	0.3	6.5	4.43741	4.10604e-08	8.42357e-08	Up	NA	NA	NA	NA	gi|345559818|gb|EGX42950.1|//hypothetical protein AOL_s00215g899 [Arthrobotrys oligospora ATCC 24927]
AOL_s00078g543	1360	1.93	41.71	4.43372	1.0508e-64	6.75877e-64	Up	NA	NA	NA	K18447//ADP-sugar diphosphatase [EC:3.6.1.21]	gi|345566567|gb|EGX49510.1|//hypothetical protein AOL_s00078g543 [Arthrobotrys oligospora ATCC 24927]
AOL_s00210g343	1208	0.72	15.48	4.42626	6.98946e-64	4.43745e-63	Up	NA	NA	NA	K16261//yeast amino acid transporter;K00777	gi|345560777|gb|EGX43896.1|//hypothetical protein AOL_s00210g343 [Arthrobotrys oligospora ATCC 24927]
AOL_s00004g175	633	0.35	7.52	4.42531	3.96396e-06	7.32582e-06	Up	NA	NA	NA	NA	gi|345571328|gb|EGX54142.1|//hypothetical protein AOL_s00004g175 [Arthrobotrys oligospora ATCC 24927]
AOL_s00006g158	5532	0.11	2.36	4.42321	2.07572e-21	6.64801e-21	Up	GO:0031224//intrinsic component of membrane;GO:0016021//integral component of membrane	NA	GO:0006810//transport;GO:0016192//vesicle-mediated transport	NA	gi|345570471|gb|EGX53292.1|//hypothetical protein AOL_s00006g158 [Arthrobotrys oligospora ATCC 24927]
AOL_s00088g38	842	1.04	22.3	4.42239	6.3962e-26	2.25293e-25	Up	NA	NA	NA	NA	gi|345564355|gb|EGX47323.1|//hypothetical protein AOL_s00088g38 [Arthrobotrys oligospora ATCC 24927]
AOL_s00054g28	537	7.52	160.82	4.41857	8.82592e-221	1.67531e-219	Up	NA	NA	NA	K10838//xeroderma pigmentosum group C-complementing protein	gi|345568737|gb|EGX51629.1|//hypothetical protein AOL_s00054g28 [Arthrobotrys oligospora ATCC 24927]
AOL_s00097g420	2013	0.96	20.45	4.41292	1.66587e-50	8.98488e-50	Up	NA	NA	NA	K06640//serine/threonine-protein kinase ATR [EC:2.7.11.1]	gi|345563806|gb|EGX46790.1|//hypothetical protein AOL_s00097g420 [Arthrobotrys oligospora ATCC 24927]
AOL_s00080g196	1125	0.54	11.5	4.41253	4.56646e-16	1.24991e-15	Up	NA	NA	NA	NA	gi|345565618|gb|EGX48567.1|//hypothetical protein AOL_s00080g196 [Arthrobotrys oligospora ATCC 24927]
AOL_s00043g787	3132	7.05	149.99	4.4111	0	0	Up	NA	NA	NA	K03260//translation initiation factor 4G;K14003//prolactin regulatory element-binding protein	gi|345568898|gb|EGX51768.1|//hypothetical protein AOL_s00043g787 [Arthrobotrys oligospora ATCC 24927]
AOL_s00097g321	4566	0.33	7.01	4.40888	9.89258e-41	4.5779e-40	Up	NA	NA	NA	NA	gi|345563912|gb|EGX46895.1|//hypothetical protein AOL_s00097g321 [Arthrobotrys oligospora ATCC 24927]
AOL_s00006g568	1625	0.25	5.31	4.40871	1.58174e-09	3.45484e-09	Up	NA	NA	NA	NA	gi|345570367|gb|EGX53190.1|//hypothetical protein AOL_s00006g568 [Arthrobotrys oligospora ATCC 24927]
AOL_s00054g802	2630	2.04	43.32	4.40839	2.37414e-130	2.725e-129	Up	GO:0044424//intracellular part	GO:0046872//metal ion binding;GO:0016763//transferase activity, transferring pentosyl groups;GO:0016757//transferase activity, transferring glycosyl groups	GO:0006547//histidine metabolic process	K00765//ATP phosphoribosyltransferase [EC:2.4.2.17]	gi|345568165|gb|EGX51066.1|//hypothetical protein AOL_s00054g802 [Arthrobotrys oligospora ATCC 24927]
AOL_s00083g52	2054	0.37	7.8	4.39788	1.62845e-17	4.66415e-17	Up	NA	NA	NA	NA	gi|345564881|gb|EGX47840.1|//hypothetical protein AOL_s00083g52 [Arthrobotrys oligospora ATCC 24927]
AOL_s00043g355	1633	0.12	2.52	4.39232	7.73044e-06	1.40198e-05	Up	NA	NA	NA	NA	gi|345569345|gb|EGX52212.1|//hypothetical protein AOL_s00043g355 [Arthrobotrys oligospora ATCC 24927]
AOL_s00076g190	3289	2.42	50.74	4.39004	6.13126e-75	4.41944e-74	Up	NA	NA	NA	NA	gi|345567494|gb|EGX50426.1|//hypothetical protein AOL_s00076g190 [Arthrobotrys oligospora ATCC 24927]
AOL_s00006g544	2260	0.93	19.41	4.38343	4.04792e-35	1.70323e-34	Up	NA	GO:0005488//binding	NA	K15110//solute carrier family 25 (mitochondrial 2-oxodicarboxylate transporter), member 21;K02155//V-type H+-transporting ATPase 16kDa proteolipid subunit;K00777;K03255//protein TIF31	gi|345570343|gb|EGX53166.1|//hypothetical protein AOL_s00006g544 [Arthrobotrys oligospora ATCC 24927]
AOL_s00004g377	1809	0.51	10.57	4.37333	1.78039e-26	6.35268e-26	Up	NA	NA	NA	K02604//origin recognition complex subunit 2	gi|345571530|gb|EGX54344.1|//hypothetical protein AOL_s00004g377 [Arthrobotrys oligospora ATCC 24927]
AOL_s00078g536	4269	0.18	3.73	4.37311	7.61498e-21	2.40419e-20	Up	NA	NA	NA	NA	gi|345566560|gb|EGX49503.1|//hypothetical protein AOL_s00078g536 [Arthrobotrys oligospora ATCC 24927]
AOL_s00007g307	2825	0.63	13.03	4.37034	3.10646e-31	1.21139e-30	Up	NA	NA	NA	K00899//5-methylthioribose kinase [EC:2.7.1.100];K15732//RNA polymerase II subunit A C-terminal domain phosphatase [EC:3.1.3.16];K04487//cysteine desulfurase [EC:2.8.1.7]	gi|345570146|gb|EGX52971.1|//hypothetical protein AOL_s00007g307 [Arthrobotrys oligospora ATCC 24927];gi|345570147|gb|EGX52972.1|//hypothetical protein AOL_s00007g308 [Arthrobotrys oligospora ATCC 24927]
AOL_s00007g495	2321	1.46	30.19	4.37003	6.42788e-81	4.95106e-80	Up	NA	NA	NA	K01705//homoaconitate hydratase [EC:4.2.1.36]	gi|345569886|gb|EGX52712.1|//hypothetical protein AOL_s00007g495 [Arthrobotrys oligospora ATCC 24927]
AOL_s00080g386	1108	2.14	44.24	4.36967	4.05198e-96	3.56268e-95	Up	NA	NA	NA	NA	gi|345565310|gb|EGX48261.1|//hypothetical protein AOL_s00080g386 [Arthrobotrys oligospora ATCC 24927]
AOL_s00004g521	3057	0.19	3.91	4.3631	5.6796e-09	1.20992e-08	Up	NA	NA	NA	K10380//ankyrin;K16726//ankyrin repeat domain-containing protein 17	gi|345571047|gb|EGX53862.1|//hypothetical protein AOL_s00004g521 [Arthrobotrys oligospora ATCC 24927]
AOL_s00078g81	578	0.3	6.13	4.35285	4.10604e-08	8.41987e-08	Up	NA	GO:0016879//ligase activity, forming carbon-nitrogen bonds;GO:0003824//catalytic activity	NA	K14541//urea carboxylase / allophanate hydrolase [EC:6.3.4.6 3.5.1.54]	gi|526199805|gb|EPS40588.1|//hypothetical protein H072_5538 [Dactylellina haptotyla CBS 200.50];gi|345566650|gb|EGX49592.1|//hypothetical protein AOL_s00078g81 [Arthrobotrys oligospora ATCC 24927]
AOL_s00007g422	1906	4.66	95.17	4.35211	2.52662e-170	3.68515e-169	Up	GO:0016021//integral component of membrane;GO:0005737//cytoplasm	GO:0004659//prenyltransferase activity;GO:0004337//geranyltranstransferase activity;GO:0004161//dimethylallyltranstransferase activity	GO:0006720//isoprenoid metabolic process;GO:0045337//farnesyl diphosphate biosynthetic process	K00787//farnesyl diphosphate synthase [EC:2.5.1.1 2.5.1.10]	gi|345569813|gb|EGX52639.1|//hypothetical protein AOL_s00007g422 [Arthrobotrys oligospora ATCC 24927]
AOL_s00054g182	1389	1.57	32	4.34924	1.18087e-52	6.54714e-52	Up	NA	NA	NA	K06662//cell cycle checkpoint protein;K12813//pre-mRNA-splicing factor ATP-dependent RNA helicase DHX16 [EC:3.6.4.13]	gi|345568590|gb|EGX51483.1|//hypothetical protein AOL_s00054g182 [Arthrobotrys oligospora ATCC 24927]
AOL_s00078g298	1215	0.16	3.24	4.33985	1.50472e-05	2.68659e-05	Up	NA	NA	NA	NA	gi|345566322|gb|EGX49265.1|//hypothetical protein AOL_s00078g298 [Arthrobotrys oligospora ATCC 24927]
AOL_s00215g918	1107	6.07	122.8	4.33847	1.05135e-154	1.40381e-153	Up	NA	NA	NA	K00540;K00383//glutathione reductase (NADPH) [EC:1.8.1.7]	gi|345559837|gb|EGX42969.1|//hypothetical protein AOL_s00215g918 [Arthrobotrys oligospora ATCC 24927]
AOL_s00091g11	1438	0.62	12.53	4.33697	1.1882e-26	4.25106e-26	Up	NA	NA	NA	K00521//ferric-chelate reductase [EC:1.16.1.7]	gi|345564295|gb|EGX47267.1|//hypothetical protein AOL_s00091g11 [Arthrobotrys oligospora ATCC 24927]
AOL_s00004g567	1347	9.05	182.3	4.33225	1.13598e-282	2.7287e-281	Up	NA	NA	NA	NA	gi|345571093|gb|EGX53908.1|//hypothetical protein AOL_s00004g567 [Arthrobotrys oligospora ATCC 24927]
BGI_novel_G000004	2457	0.7	14.09	4.33117	1.34315e-42	6.41629e-42	Up	NA	NA	NA	K01845//glutamate-1-semialdehyde 2,1-aminomutase [EC:5.4.3.8]	gi|526200901|gb|EPS41509.1|//hypothetical protein H072_4620 [Dactylellina haptotyla CBS 200.50]
AOL_s00188g116	2182	68.7	1380.41	4.32864	0	0	Up	NA	NA	NA	K08157//MFS transporter, DHA1 family, multidrug resistance protein	gi|345561690|gb|EGX44778.1|//hypothetical protein AOL_s00188g116 [Arthrobotrys oligospora ATCC 24927]
AOL_s00173g193	2222	3.42	68.58	4.32572	2.13e-215	3.90012e-214	Up	NA	NA	NA	K01426//amidase [EC:3.5.1.4]	gi|345562020|gb|EGX45092.1|//hypothetical protein AOL_s00173g193 [Arthrobotrys oligospora ATCC 24927]
AOL_s00076g41	4274	11.37	226.81	4.31818	0	0	Up	NA	NA	NA	K01183//chitinase [EC:3.2.1.14]	gi|345567345|gb|EGX50277.1|//hypothetical protein AOL_s00076g41 [Arthrobotrys oligospora ATCC 24927]
AOL_s00007g55	2167	0.18	3.58	4.31389	2.11752e-10	4.8006e-10	Up	NA	NA	NA	K00888//phosphatidylinositol 4-kinase [EC:2.7.1.67]	gi|345570282|gb|EGX53106.1|//hypothetical protein AOL_s00007g55 [Arthrobotrys oligospora ATCC 24927];gi|345570283|gb|EGX53107.1|//hypothetical protein AOL_s00007g56 [Arthrobotrys oligospora ATCC 24927]
AOL_s00083g270	928	11.92	236.76	4.31197	8.18592e-209	1.45043e-207	Up	NA	GO:0016798//hydrolase activity, acting on glycosyl bonds	GO:0044238//primary metabolic process	NA	gi|345564802|gb|EGX47762.1|//hypothetical protein AOL_s00083g270 [Arthrobotrys oligospora ATCC 24927]
AOL_s00097g212	1180	0.28	5.56	4.31159	3.85418e-17	1.0905e-16	Up	NA	NA	NA	NA	gi|345563991|gb|EGX46973.1|//hypothetical protein AOL_s00097g212 [Arthrobotrys oligospora ATCC 24927]
AOL_s00083g79	3006	2.26	44.79	4.30878	1.66772e-134	1.96252e-133	Up	NA	NA	NA	NA	gi|345564611|gb|EGX47571.1|//hypothetical protein AOL_s00083g79 [Arthrobotrys oligospora ATCC 24927]
AOL_s00210g187	1271	0.51	10.07	4.30342	4.0185e-17	1.1363e-16	Up	NA	GO:0097159//organic cyclic compound binding;GO:1901363//heterocyclic compound binding;GO:0005488//binding	NA	K03234//elongation factor 2	gi|345560909|gb|EGX44026.1|//hypothetical protein AOL_s00210g187 [Arthrobotrys oligospora ATCC 24927]
AOL_s00078g295	1954	1.19	23.45	4.30055	4.2159e-63	2.65488e-62	Up	NA	GO:0016772//transferase activity, transferring phosphorus-containing groups	NA	K00894//ethanolamine kinase [EC:2.7.1.82]	gi|345566319|gb|EGX49262.1|//hypothetical protein AOL_s00078g295 [Arthrobotrys oligospora ATCC 24927]
AOL_s00097g195	755	5.36	105.56	4.29969	2.9247e-97	2.59355e-96	Up	NA	NA	NA	K00852//ribokinase [EC:2.7.1.15]	gi|345564168|gb|EGX47149.1|//hypothetical protein AOL_s00097g195 [Arthrobotrys oligospora ATCC 24927]
AOL_s00079g489	2264	2.09	41.14	4.29897	2.8475e-91	2.42141e-90	Up	NA	NA	NA	K06997//PLP dependent protein	gi|345565902|gb|EGX48850.1|//hypothetical protein AOL_s00079g489 [Arthrobotrys oligospora ATCC 24927]
AOL_s00076g25	5662	0.43	8.44	4.29483	8.54002e-38	3.76504e-37	Up	NA	NA	NA	K09468//zinc finger protein MSN2/4	gi|345567544|gb|EGX50475.1|//hypothetical protein AOL_s00076g25 [Arthrobotrys oligospora ATCC 24927]
AOL_s00088g51	7946	0.72	14.13	4.29462	8.36358e-139	1.01101e-137	Up	NA	NA	NA	K00852//ribokinase [EC:2.7.1.15]	gi|345564368|gb|EGX47336.1|//hypothetical protein AOL_s00088g51 [Arthrobotrys oligospora ATCC 24927]
AOL_s00078g417	1155	0.35	6.85	4.29068	4.109e-10	9.21238e-10	Up	NA	NA	NA	K00540;K17871//NADH:ubiquinone reductase (non-electrogenic) [EC:1.6.5.9]	gi|345566441|gb|EGX49384.1|//hypothetical protein AOL_s00078g417 [Arthrobotrys oligospora ATCC 24927]
AOL_s00170g34	2005	0.53	10.37	4.29028	1.56245e-32	6.25787e-32	Up	NA	GO:0016620//oxidoreductase activity, acting on the aldehyde or oxo group of donors, NAD or NADP as acceptor	GO:0008152//metabolic process;GO:0055114//oxidation-reduction process	K00129//aldehyde dehydrogenase (NAD(P)+) [EC:1.2.1.5];K00128//aldehyde dehydrogenase (NAD+) [EC:1.2.1.3]	gi|345562258|gb|EGX45327.1|//hypothetical protein AOL_s00170g34 [Arthrobotrys oligospora ATCC 24927]
AOL_s00079g221	4265	2.28	44.55	4.28832	9.6529e-167	1.37142e-165	Up	NA	NA	NA	K01183//chitinase [EC:3.2.1.14]	gi|345566053|gb|EGX49000.1|//hypothetical protein AOL_s00079g221 [Arthrobotrys oligospora ATCC 24927]
AOL_s00079g338	2230	0.47	9.16	4.28461	1.25862e-14	3.30154e-14	Up	NA	NA	NA	K10380//ankyrin;K15110//solute carrier family 25 (mitochondrial 2-oxodicarboxylate transporter), member 21;K02155//V-type H+-transporting ATPase 16kDa proteolipid subunit;K00777	gi|345565751|gb|EGX48699.1|//hypothetical protein AOL_s00079g338 [Arthrobotrys oligospora ATCC 24927]
AOL_s00210g260	6948	2.11	41	4.28031	0	0	Up	NA	GO:0033743//peptide-methionine (R)-S-oxide reductase activity	GO:0006979//response to oxidative stress;GO:0030091//protein repair;GO:0055114//oxidation-reduction process	K07305//peptide-methionine (R)-S-oxide reductase [EC:1.8.4.12]	gi|345560982|gb|EGX44099.1|//hypothetical protein AOL_s00210g260 [Arthrobotrys oligospora ATCC 24927]
AOL_s00140g93	3936	0.18	3.49	4.27716	7.85626e-19	2.33558e-18	Up	NA	NA	NA	K00706//1,3-beta-glucan synthase [EC:2.4.1.34];K00688//starch phosphorylase [EC:2.4.1.1];K18626//trichohyalin;K01930//folylpolyglutamate synthase [EC:6.3.2.17]	gi|345562741|gb|EGX45777.1|//hypothetical protein AOL_s00140g93 [Arthrobotrys oligospora ATCC 24927]
AOL_s00215g373	960	1.73	33.46	4.27359	1.04636e-36	4.52115e-36	Up	NA	NA	NA	K01011//thiosulfate/3-mercaptopyruvate sulfurtransferase [EC:2.8.1.1 2.8.1.2]	gi|345560512|gb|EGX43637.1|//hypothetical protein AOL_s00215g373 [Arthrobotrys oligospora ATCC 24927]
AOL_s00081g344	2671	33.7	648.77	4.26689	0	0	Up	NA	GO:0015926//glucosidase activity;GO:0004573//mannosyl-oligosaccharide glucosidase activity;GO:0003824//catalytic activity	GO:0008152//metabolic process;GO:0009311//oligosaccharide metabolic process;GO:0005975//carbohydrate metabolic process	K01228//mannosyl-oligosaccharide glucosidase [EC:3.2.1.106]	gi|345565061|gb|EGX48017.1|//hypothetical protein AOL_s00081g344 [Arthrobotrys oligospora ATCC 24927];gi|526204898|gb|EPS45072.1|//hypothetical protein H072_939 [Dactylellina haptotyla CBS 200.50]
AOL_s00097g554	1287	0.25	4.8	4.26303	1.5092e-07	3.00615e-07	Up	NA	NA	NA	NA	gi|345563664|gb|EGX46650.1|//hypothetical protein AOL_s00097g554 [Arthrobotrys oligospora ATCC 24927]
AOL_s00173g205	794	4.59	88.11	4.26274	4.02406e-85	3.22201e-84	Up	NA	NA	NA	K04409//p21-activated kinase 1 [EC:2.7.11.1];K00924;K08286//protein-serine/threonine kinase [EC:2.7.11.-];K08794//calcium/calmodulin-dependent protein kinase I [EC:2.7.11.17]	gi|345562032|gb|EGX45104.1|//hypothetical protein AOL_s00173g205 [Arthrobotrys oligospora ATCC 24927]
AOL_s00007g208	648	2.36	45.26	4.26138	1.13044e-31	4.44355e-31	Up	NA	NA	NA	K19001//ATP-dependent DNA helicase;K00670//peptide alpha-N-acetyltransferase [EC:2.3.1.88]	gi|345570047|gb|EGX52872.1|//hypothetical protein AOL_s00007g208 [Arthrobotrys oligospora ATCC 24927]
AOL_s00076g58	1503	1.4	26.68	4.25226	6.48458e-48	3.382e-47	Up	NA	NA	NA	NA	gi|345567362|gb|EGX50294.1|//hypothetical protein AOL_s00076g58 [Arthrobotrys oligospora ATCC 24927]
AOL_s00076g283	5482	5.15	97.59	4.24409	2.52498e-248	5.37279e-247	Up	NA	GO:0016787//hydrolase activity;GO:0003933//GTP cyclohydrolase activity	GO:0006771//riboflavin metabolic process	K01497//GTP cyclohydrolase II [EC:3.5.4.25]	gi|582960076|gb|EWC48269.1|//uracil-regulated protein 1 [Drechslerella stenobrocha 248];gi|345567274|gb|EGX50208.1|//hypothetical protein AOL_s00076g283 [Arthrobotrys oligospora ATCC 24927]
AOL_s00076g700	685	0.39	7.37	4.24012	2.02906e-06	3.80806e-06	Up	NA	NA	NA	K03362//F-box and WD-40 domain protein 1/11	gi|345566876|gb|EGX49816.1|//hypothetical protein AOL_s00076g700 [Arthrobotrys oligospora ATCC 24927]
AOL_s00078g508	1531	0.26	4.91	4.23914	7.96414e-10	1.7635e-09	Up	NA	NA	NA	NA	gi|345566532|gb|EGX49475.1|//hypothetical protein AOL_s00078g508 [Arthrobotrys oligospora ATCC 24927]
AOL_s00097g384	1312	1.1	20.76	4.23823	2.00726e-30	7.69546e-30	Up	NA	NA	NA	K17475//tryprostatin B 6-hydroxylase [EC:1.14.13.176];K07824//benzoate 4-monooxygenase [EC:1.14.13.12]	gi|345563975|gb|EGX46958.1|//hypothetical protein AOL_s00097g384 [Arthrobotrys oligospora ATCC 24927]
AOL_s00054g711	6504	0.32	6.02	4.23362	3.04378e-23	1.01278e-22	Up	NA	NA	NA	K10380//ankyrin;K16261//yeast amino acid transporter	gi|345568074|gb|EGX50975.1|//hypothetical protein AOL_s00054g711 [Arthrobotrys oligospora ATCC 24927]
AOL_s00006g578	1152	0.53	9.94	4.22918	4.63432e-15	1.22984e-14	Up	NA	NA	NA	NA	gi|345570377|gb|EGX53200.1|//hypothetical protein AOL_s00006g578 [Arthrobotrys oligospora ATCC 24927]
AOL_s00173g259	943	0.43	8.06	4.22837	1.51991e-18	4.46723e-18	Up	NA	NA	NA	K01178//glucoamylase [EC:3.2.1.3];K01183//chitinase [EC:3.2.1.14]	gi|345562086|gb|EGX45158.1|//hypothetical protein AOL_s00173g259 [Arthrobotrys oligospora ATCC 24927]
AOL_s00004g408	4535	1.03	19.28	4.22639	3.58874e-136	4.26077e-135	Up	NA	NA	NA	K15110//solute carrier family 25 (mitochondrial 2-oxodicarboxylate transporter), member 21;K09448//transcriptional enhancer factor;K02155//V-type H+-transporting ATPase 16kDa proteolipid subunit;K00777;K11644//paired amphipathic helix protein Sin3a	gi|345570934|gb|EGX53749.1|//hypothetical protein AOL_s00004g408 [Arthrobotrys oligospora ATCC 24927]
AOL_s00007g105	597	0.37	6.92	4.22517	2.92286e-05	5.10802e-05	Up	NA	NA	NA	NA	gi|345569944|gb|EGX52769.1|//hypothetical protein AOL_s00007g105 [Arthrobotrys oligospora ATCC 24927]
AOL_s00076g98	1211	0.33	6.16	4.22239	1.54175e-09	3.36986e-09	Up	NA	NA	NA	NA	gi|345567402|gb|EGX50334.1|//hypothetical protein AOL_s00076g98 [Arthrobotrys oligospora ATCC 24927]
AOL_s00007g156	417	1.17	21.76	4.2171	1.54175e-09	3.36828e-09	Up	NA	NA	NA	NA	gi|345569995|gb|EGX52820.1|//hypothetical protein AOL_s00007g156 [Arthrobotrys oligospora ATCC 24927]
AOL_s00078g377	783	0.27	5.02	4.21666	2.92286e-05	5.10706e-05	Up	NA	NA	NA	NA	gi|345566401|gb|EGX49344.1|//hypothetical protein AOL_s00078g377 [Arthrobotrys oligospora ATCC 24927]
AOL_s00075g125	783	0.27	5.02	4.21666	2.92286e-05	5.1061e-05	Up	NA	NA	NA	K18740//exonuclease 3'-5' domain-containing protein 1	gi|345567771|gb|EGX50699.1|//hypothetical protein AOL_s00075g125 [Arthrobotrys oligospora ATCC 24927]
AOL_s00215g733	2410	1.19	22.1	4.21501	1.39918e-63	8.84092e-63	Up	NA	NA	NA	NA	gi|345559994|gb|EGX43124.1|//hypothetical protein AOL_s00215g733 [Arthrobotrys oligospora ATCC 24927]
AOL_s00043g32	445	1.53	28.35	4.21175	6.89932e-14	1.7675e-13	Up	NA	GO:0046872//metal ion binding;GO:0042578//phosphoric ester hydrolase activity;GO:0016788//hydrolase activity, acting on ester bonds	GO:0034641//cellular nitrogen compound metabolic process;GO:0006753//nucleoside phosphate metabolic process;GO:0006796//phosphate-containing compound metabolic process;GO:0044281//small molecule metabolic process;GO:0006629//lipid metabolic process	K18550//IMP and pyridine-specific 5'-nucleotidase [EC:3.1.3.-]	gi|345569673|gb|EGX52538.1|//hypothetical protein AOL_s00043g32 [Arthrobotrys oligospora ATCC 24927]
AOL_s00215g343	1830	2.23	41.17	4.20648	5.79946e-88	4.77904e-87	Up	NA	NA	NA	NA	gi|345560482|gb|EGX43607.1|//hypothetical protein AOL_s00215g343 [Arthrobotrys oligospora ATCC 24927]
AOL_s00081g12	1638	1.71	31.53	4.20466	6.91828e-51	3.75748e-50	Up	NA	NA	NA	K08254//glucan endo-1,3-alpha-glucosidase [EC:3.2.1.59]	gi|345565197|gb|EGX48149.1|//hypothetical protein AOL_s00081g12 [Arthrobotrys oligospora ATCC 24927]
AOL_s00097g13	1834	0.62	11.36	4.19555	7.63496e-45	3.79508e-44	Up	NA	NA	NA	K13621//betaine lipid synthase	gi|345564194|gb|EGX47174.1|//hypothetical protein AOL_s00097g13 [Arthrobotrys oligospora ATCC 24927]
AOL_s00173g125	5884	15.65	286.41	4.19385	0	0	Up	NA	GO:0046872//metal ion binding;GO:0005488//binding	GO:0006351//transcription, DNA-templated	K09240//transcriptional regulatory protein CAT8;K01113//alkaline phosphatase D [EC:3.1.3.1];K09241//transcriptional regulatory protein GAL4	gi|345561951|gb|EGX45023.1|//hypothetical protein AOL_s00173g124 [Arthrobotrys oligospora ATCC 24927];gi|345561952|gb|EGX45024.1|//hypothetical protein AOL_s00173g125 [Arthrobotrys oligospora ATCC 24927]
AOL_s00110g227	2698	0.28	5.12	4.19265	6.05178e-11	1.40235e-10	Up	NA	NA	NA	NA	gi|345563059|gb|EGX46063.1|//hypothetical protein AOL_s00110g227 [Arthrobotrys oligospora ATCC 24927]
AOL_s00169g51	3294	5.91	108.06	4.19253	1.01448e-201	1.73805e-200	Up	NA	GO:0016836//hydro-lyase activity;GO:0003824//catalytic activity	GO:0009063//cellular amino acid catabolic process;GO:0006520//cellular amino acid metabolic process	K01684//galactonate dehydratase [EC:4.2.1.6]	gi|345562377|gb|EGX45445.1|//hypothetical protein AOL_s00169g51 [Arthrobotrys oligospora ATCC 24927]
AOL_s00004g262	3284	0.29	5.3	4.19187	7.02508e-22	2.27497e-21	Up	NA	NA	NA	K10356//myosin I;K14005//protein transport protein SEC31;K03243//translation initiation factor 5B;K18721//nucleoporin NUP1	gi|345571415|gb|EGX54229.1|//hypothetical protein AOL_s00004g262 [Arthrobotrys oligospora ATCC 24927]
AOL_s00081g114	2023	0.3	5.48	4.19114	1.46951e-14	3.84283e-14	Up	NA	NA	NA	K14548//U3 small nucleolar RNA-associated protein 4	gi|345565165|gb|EGX48118.1|//hypothetical protein AOL_s00081g114 [Arthrobotrys oligospora ATCC 24927]
AOL_s00078g600	1088	0.75	13.67	4.18798	1.09625e-17	3.15342e-17	Up	NA	NA	NA	NA	gi|345566272|gb|EGX49216.1|//hypothetical protein AOL_s00078g600 [Arthrobotrys oligospora ATCC 24927]
AOL_s00043g117	7329	15.72	284.91	4.17983	0	0	Up	GO:0044424//intracellular part;GO:0005835//fatty acid synthase complex	GO:0000287//magnesium ion binding;GO:0046872//metal ion binding;GO:0016408//C-acyltransferase activity;GO:0016780//phosphotransferase activity, for other substituted phosphate groups;GO:0004312//fatty acid synthase activity;GO:0008897//holo-[acyl-carrier-protein] synthase activity	GO:1900535//palmitic acid biosynthetic process;GO:0009058//biosynthetic process;GO:0006631//fatty acid metabolic process;GO:0042759//long-chain fatty acid biosynthetic process	K00667//fatty acid synthase subunit alpha, fungi type [EC:2.3.1.86]	gi|345569462|gb|EGX52328.1|//hypothetical protein AOL_s00043g117 [Arthrobotrys oligospora ATCC 24927];gi|526204104|gb|EPS44344.1|//hypothetical protein H072_1648 [Dactylellina haptotyla CBS 200.50]
AOL_s00083g490	7053	60.56	1094.97	4.17638	0	0	Up	NA	NA	NA	K01785//aldose 1-epimerase [EC:5.1.3.3]	gi|526196030|gb|EPS37462.1|//hypothetical protein H072_8836 [Dactylellina haptotyla CBS 200.50];gi|345564435|gb|EGX47398.1|//hypothetical protein AOL_s00083g491 [Arthrobotrys oligospora ATCC 24927];gi|345564434|gb|EGX47397.1|//hypothetical protein AOL_s00083g490 [Arthrobotrys oligospora ATCC 24927]
AOL_s00188g226	1756	1.22	22.02	4.17386	9.15238e-55	5.21714e-54	Up	NA	NA	NA	NA	gi|345561469|gb|EGX44558.1|//hypothetical protein AOL_s00188g226 [Arthrobotrys oligospora ATCC 24927]
AOL_s00043g789	4109	10.46	188.33	4.17031	0	0	Up	NA	NA	NA	K15441//tRNA-specific adenosine deaminase 2 [EC:3.5.4.-];K18884//4-dimethylallyltryptophan N-methyltransferase [EC:2.1.1.261]	gi|345568900|gb|EGX51770.1|//hypothetical protein AOL_s00043g789 [Arthrobotrys oligospora ATCC 24927]
AOL_s00215g184	1061	0.16	2.88	4.16993	0.00040571	0.000656347	Up	NA	NA	NA	NA	gi|345560323|gb|EGX43448.1|//hypothetical protein AOL_s00215g184 [Arthrobotrys oligospora ATCC 24927]
AOL_s00004g383	4258	5.45	98.05	4.16919	0	0	Up	NA	NA	NA	K10380//ankyrin;K16261//yeast amino acid transporter;K00777	gi|345571536|gb|EGX54350.1|//hypothetical protein AOL_s00004g383 [Arthrobotrys oligospora ATCC 24927]
AOL_s00193g69	4162	3.98	71.54	4.16791	9.42688e-146	1.18408e-144	Up	GO:0031224//intrinsic component of membrane;GO:0016021//integral component of membrane	GO:0046914//transition metal ion binding;GO:0003824//catalytic activity;GO:0050662//coenzyme binding;GO:0016491//oxidoreductase activity	GO:0008152//metabolic process;GO:0055114//oxidation-reduction process	K08008//NADPH oxidase	gi|345561245|gb|EGX44341.1|//hypothetical protein AOL_s00193g69 [Arthrobotrys oligospora ATCC 24927]
AOL_s00188g330	5269	0.29	5.21	4.16716	3.91342e-34	1.61385e-33	Up	NA	NA	NA	K05351//D-xylulose reductase [EC:1.1.1.9]	gi|345561573|gb|EGX44662.1|//hypothetical protein AOL_s00188g330 [Arthrobotrys oligospora ATCC 24927]
AOL_s00043g356	1173	0.75	13.43	4.16242	1.2802e-45	6.4599e-45	Up	NA	NA	NA	NA	gi|345569346|gb|EGX52213.1|//hypothetical protein AOL_s00043g356 [Arthrobotrys oligospora ATCC 24927];gi|345569347|gb|EGX52214.1|//hypothetical protein AOL_s00043g357 [Arthrobotrys oligospora ATCC 24927]
AOL_s00076g26	3551	1.82	32.58	4.16198	2.6174e-102	2.42006e-101	Up	NA	NA	NA	K03260//translation initiation factor 4G;K08866//serine/threonine-protein kinase TTK/MPS1 [EC:2.7.12.1]	gi|345567545|gb|EGX50476.1|//hypothetical protein AOL_s00076g26 [Arthrobotrys oligospora ATCC 24927]
AOL_s00048g1	849	1.72	30.77	4.16104	4.19198e-29	1.57601e-28	Up	GO:0043231//intracellular membrane-bounded organelle;GO:0044444//cytoplasmic part	NA	GO:0044260//cellular macromolecule metabolic process;GO:0090304//nucleic acid metabolic process	NA	gi|345568844|gb|EGX51720.1|//hypothetical protein AOL_s00048g1 [Arthrobotrys oligospora ATCC 24927]
AOL_s00173g30	6238	1.19	21.25	4.15843	5.24886e-171	7.70384e-170	Up	NA	NA	NA	K01179//endoglucanase [EC:3.2.1.4];K19668//cellulose 1,4-beta-cellobiosidase [EC:3.2.1.91];K19356//cellulase [EC:3.2.1.4];K01181//endo-1,4-beta-xylanase [EC:3.2.1.8]	gi|345561857|gb|EGX44929.1|//hypothetical protein AOL_s00173g30 [Arthrobotrys oligospora ATCC 24927]
AOL_s00083g411	2089	0.46	8.21	4.15768	5.03502e-21	1.59831e-20	Up	NA	NA	NA	K07025//putative hydrolase of the HAD superfamily	gi|345564513|gb|EGX47475.1|//hypothetical protein AOL_s00083g411 [Arthrobotrys oligospora ATCC 24927]
AOL_s00007g294	1457	0.19	3.39	4.15721	6.9766e-08	1.41598e-07	Up	NA	NA	NA	NA	gi|345570133|gb|EGX52958.1|//hypothetical protein AOL_s00007g294 [Arthrobotrys oligospora ATCC 24927]
AOL_s00097g182	2464	1.02	18.11	4.15015	2.09504e-19	6.31289e-19	Up	NA	NA	NA	NA	gi|345564155|gb|EGX47136.1|//hypothetical protein AOL_s00097g182 [Arthrobotrys oligospora ATCC 24927]
AOL_s00075g31	4853	1.28	22.72	4.14975	1.28061e-38	5.73259e-38	Up	NA	NA	NA	NA	gi|345567677|gb|EGX50605.1|//hypothetical protein AOL_s00075g31 [Arthrobotrys oligospora ATCC 24927]
AOL_s00083g12	1511	9.72	171.73	4.14304	8.5045e-284	2.05875e-282	Up	NA	NA	NA	K06126//ubiquinone biosynthesis monooxygenase Coq6 [EC:1.14.13.-]	gi|345564841|gb|EGX47800.1|//hypothetical protein AOL_s00083g12 [Arthrobotrys oligospora ATCC 24927]
AOL_s00076g255	1678	0.66	11.65	4.14172	3.89024e-20	1.20056e-19	Up	NA	NA	NA	K00100;K00062//D-arabinose 1-dehydrogenase [EC:1.1.1.116];K05275//pyridoxine 4-dehydrogenase [EC:1.1.1.65]	gi|345567246|gb|EGX50180.1|//hypothetical protein AOL_s00076g255 [Arthrobotrys oligospora ATCC 24927]
AOL_s00091g46	2279	0.46	8.11	4.14	1.7616e-13	4.45418e-13	Up	NA	NA	NA	NA	gi|345564251|gb|EGX47225.1|//hypothetical protein AOL_s00091g46 [Arthrobotrys oligospora ATCC 24927]
AOL_s00169g261	2590	1.86	32.78	4.13944	3.34796e-80	2.56182e-79	Up	NA	NA	NA	K02920//large subunit ribosomal protein L36e;K14950//cation-transporting ATPase 13A1 [EC:3.6.3.-];K01613//phosphatidylserine decarboxylase [EC:4.1.1.65];K06123//1-acylglycerone phosphate reductase [EC:1.1.1.101];K14213//Xaa-Pro dipeptidase [EC:3.4.13.9]	gi|345562587|gb|EGX45655.1|//hypothetical protein AOL_s00169g261 [Arthrobotrys oligospora ATCC 24927];gi|526200024|gb|EPS40763.1|//hypothetical protein H072_5350 [Dactylellina haptotyla CBS 200.50]
AOL_s00140g107	4018	0.28	4.92	4.13516	7.65064e-20	2.34014e-19	Up	NA	NA	NA	K11245//mating pheromone-induced death protein 2;K11244//cell wall integrity and stress response component;K01183//chitinase [EC:3.2.1.14];K14824//ribosome biogenesis protein ERB1	gi|345562755|gb|EGX45791.1|//hypothetical protein AOL_s00140g107 [Arthrobotrys oligospora ATCC 24927]
AOL_s00006g509	619	0.25	4.39	4.13422	1.34382e-05	2.40807e-05	Up	NA	NA	NA	K15110//solute carrier family 25 (mitochondrial 2-oxodicarboxylate transporter), member 21;K00777	gi|345570426|gb|EGX53248.1|//hypothetical protein AOL_s00006g509 [Arthrobotrys oligospora ATCC 24927]
AOL_s00215g276	1803	21.03	368.8	4.13232	0	0	Up	NA	NA	NA	K06125//4-hydroxybenzoate polyprenyltransferase [EC:2.5.1.39]	gi|345560415|gb|EGX43540.1|//hypothetical protein AOL_s00215g276 [Arthrobotrys oligospora ATCC 24927]
AOL_s00083g118	1126	0.44	7.71	4.13116	3.8816e-12	9.37215e-12	Up	NA	NA	NA	K06001//tryptophan synthase beta chain [EC:4.2.1.20]	gi|345564650|gb|EGX47610.1|//hypothetical protein AOL_s00083g118 [Arthrobotrys oligospora ATCC 24927]
BGI_novel_G000002	1161	1.91	33.3	4.12388	1.63734e-43	7.92727e-43	Up	GO:0005622//intracellular	GO:0005525//GTP binding	GO:0007264//small GTPase mediated signal transduction	K07904//Ras-related protein Rab-11A	gi|667652055|ref|XP_008597859.1|//Ras family protein [Beauveria bassiana ARSEF 2860]
AOL_s00091g60	1644	0.12	2.09	4.1224	5.6646e-05	9.72983e-05	Up	NA	NA	NA	NA	gi|345564265|gb|EGX47239.1|//hypothetical protein AOL_s00091g60 [Arthrobotrys oligospora ATCC 24927]
AOL_s00210g56	435	0.81	14.09	4.12061	5.29164e-07	1.02383e-06	Up	GO:0043234//protein complex	GO:0016418//S-acetyltransferase activity;GO:0016740//transferase activity	GO:0032787//monocarboxylic acid metabolic process	K00627//pyruvate dehydrogenase E2 component (dihydrolipoamide acetyltransferase) [EC:2.3.1.12];K08496//golgi SNAP receptor complex member 2	gi|345561069|gb|EGX44184.1|//hypothetical protein AOL_s00210g56 [Arthrobotrys oligospora ATCC 24927]
AOL_s00083g317	349	1.86	32.2	4.11369	5.60524e-11	1.30082e-10	Up	GO:0044464//cell part	GO:0016769//transferase activity, transferring nitrogenous groups;GO:0032561//guanyl ribonucleotide binding;GO:0016740//transferase activity;GO:0048037//cofactor binding	GO:0008152//metabolic process;GO:0032506//cytokinetic process	NA	gi|345564547|gb|EGX47508.1|//hypothetical protein AOL_s00083g317 [Arthrobotrys oligospora ATCC 24927]
AOL_s00188g266	2383	1.23	21.17	4.10529	2.59816e-59	1.55923e-58	Up	NA	NA	NA	NA	gi|345561509|gb|EGX44598.1|//hypothetical protein AOL_s00188g266 [Arthrobotrys oligospora ATCC 24927]
AOL_s00083g389	778	2.45	42.16	4.10502	1.84209e-35	7.80376e-35	Up	NA	NA	NA	NA	gi|345564491|gb|EGX47453.1|//hypothetical protein AOL_s00083g389 [Arthrobotrys oligospora ATCC 24927]
AOL_s00117g35	1886	31.71	545.33	4.10412	0	0	Up	GO:0031224//intrinsic component of membrane;GO:0016020//membrane	GO:0015405//P-P-bond-hydrolysis-driven transmembrane transporter activity;GO:0032559//adenyl ribonucleotide binding;GO:0000166//nucleotide binding;GO:0017111//nucleoside-triphosphatase activity	GO:0051234//establishment of localization;GO:0009207//purine ribonucleoside triphosphate catabolic process	K08711//ATP-binding cassette, subfamily G (WHITE), member 2, PDR;K08712//ATP-binding cassette, subfamily G (WHITE), member 2, SNQ2	gi|345562817|gb|EGX45830.1|//hypothetical protein AOL_s00117g35 [Arthrobotrys oligospora ATCC 24927]
AOL_s00173g133	2279	8.86	152.18	4.10233	0	0	Up	NA	GO:0008233//peptidase activity	NA	K02355//elongation factor G;K10755//replication factor C subunit 2/4;K01381//saccharopepsin [EC:3.4.23.25];K06009//yapsin 1 [EC:3.4.23.41];K06005//candidapepsin [EC:3.4.23.24]	gi|345561960|gb|EGX45032.1|//hypothetical protein AOL_s00173g133 [Arthrobotrys oligospora ATCC 24927]
AOL_s00210g237	2216	3.77	64.62	4.09934	4.30858e-123	4.69112e-122	Up	NA	GO:0016824//hydrolase activity, acting on acid halide bonds;GO:0016791//phosphatase activity	NA	K07393//putative glutathione S-transferase	gi|526200477|gb|EPS41102.1|//hypothetical protein H072_4951 [Dactylellina haptotyla CBS 200.50];gi|345560959|gb|EGX44076.1|//hypothetical protein AOL_s00210g237 [Arthrobotrys oligospora ATCC 24927]
AOL_s00210g366	507	1.95	33.42	4.09917	1.42695e-21	4.58276e-21	Up	GO:0044464//cell part	NA	GO:0006810//transport	K08158//MFS transporter, DHA1 family, multidrug resistance protein;K08157//MFS transporter, DHA1 family, multidrug resistance protein	gi|526203476|gb|EPS43751.1|//hypothetical protein H072_2273 [Dactylellina haptotyla CBS 200.50];gi|345560800|gb|EGX43919.1|//hypothetical protein AOL_s00210g366 [Arthrobotrys oligospora ATCC 24927]
AOL_s00215g823	1446	0.84	14.35	4.09452	2.98896e-28	1.10544e-27	Up	NA	GO:0033764//steroid dehydrogenase activity, acting on the CH-OH group of donors, NAD or NADP as acceptor;GO:0003824//catalytic activity	GO:0008152//metabolic process	K00540;K00059//3-oxoacyl-[acyl-carrier protein] reductase [EC:1.1.1.100];K13237//peroxisomal 2,4-dienoyl-CoA reductase [EC:1.3.1.34]	gi|345559906|gb|EGX43037.1|//hypothetical protein AOL_s00215g823 [Arthrobotrys oligospora ATCC 24927]
AOL_s00004g13	1645	5.01	85.57	4.09422	0	0	Up	NA	GO:0016787//hydrolase activity;GO:0005488//binding	NA	K18693//diacylglycerol diphosphate phosphatase / phosphatidate phosphatase [EC:3.1.3.81 3.1.3.4]	gi|345571551|gb|EGX54364.1|//hypothetical protein AOL_s00004g13 [Arthrobotrys oligospora ATCC 24927]
AOL_s00081g23	3779	11.11	189.52	4.09242	0	0	Up	NA	NA	NA	NA	gi|345565208|gb|EGX48160.1|//hypothetical protein AOL_s00081g23 [Arthrobotrys oligospora ATCC 24927]
AOL_s00215g618	1464	0.32	5.45	4.09011	4.61014e-09	9.85923e-09	Up	NA	NA	NA	K01183//chitinase [EC:3.2.1.14]	gi|345560033|gb|EGX43162.1|//hypothetical protein AOL_s00215g618 [Arthrobotrys oligospora ATCC 24927]
AOL_s00004g87	2301	13.55	230.38	4.08765	0	0	Up	GO:0005829//cytosol	GO:0000287//magnesium ion binding;GO:0030955//potassium ion binding;GO:0004743//pyruvate kinase activity;GO:0031420//alkali metal ion binding;GO:0016301//kinase activity	GO:0061621//canonical glycolysis;GO:0006007//glucose catabolic process;GO:0042866//pyruvate biosynthetic process;GO:0006796//phosphate-containing compound metabolic process	K00873//pyruvate kinase [EC:2.7.1.40]	gi|345571240|gb|EGX54054.1|//hypothetical protein AOL_s00004g87 [Arthrobotrys oligospora ATCC 24927]
AOL_s00078g281	2207	0.09	1.53	4.08746	5.6646e-05	9.72804e-05	Up	NA	NA	NA	NA	gi|345566305|gb|EGX49248.1|//hypothetical protein AOL_s00078g281 [Arthrobotrys oligospora ATCC 24927]
AOL_s00215g278	2044	9.74	165.39	4.08581	0	0	Up	NA	GO:0005488//binding	NA	K00517;K05917//sterol 14-demethylase [EC:1.14.13.70];K14338//cytochrome P450 / NADPH-cytochrome P450 reductase [EC:1.14.14.1 1.6.2.4]	gi|345560417|gb|EGX43542.1|//hypothetical protein AOL_s00215g278 [Arthrobotrys oligospora ATCC 24927]
AOL_s00054g756	3634	0.86	14.48	4.07358	3.22994e-54	1.8322e-53	Up	NA	NA	NA	NA	gi|345568119|gb|EGX51020.1|//hypothetical protein AOL_s00054g756 [Arthrobotrys oligospora ATCC 24927]
AOL_s00007g199	3177	1.01	16.98	4.07141	2.22144e-63	1.4027e-62	Up	NA	NA	NA	NA	gi|345570038|gb|EGX52863.1|//hypothetical protein AOL_s00007g199 [Arthrobotrys oligospora ATCC 24927]
AOL_s00054g431	2279	5.02	84.33	4.07029	1.55229e-181	2.41525e-180	Up	GO:0016021//integral component of membrane	GO:0046872//metal ion binding;GO:0016728//oxidoreductase activity, acting on CH or CH2 groups, disulfide as acceptor;GO:0016491//oxidoreductase activity	GO:0009186//deoxyribonucleoside diphosphate metabolic process;GO:0009132//nucleoside diphosphate metabolic process;GO:0055114//oxidation-reduction process	K10808//ribonucleoside-diphosphate reductase subunit M2 [EC:1.17.4.1]	gi|345568467|gb|EGX51361.1|//hypothetical protein AOL_s00054g431 [Arthrobotrys oligospora ATCC 24927]
AOL_s00043g353	1504	1.63	27.37	4.06965	6.47378e-68	4.32204e-67	Up	NA	NA	NA	NA	gi|345569343|gb|EGX52210.1|//hypothetical protein AOL_s00043g353 [Arthrobotrys oligospora ATCC 24927]
AOL_s00007g429	4493	0.42	7.03	4.06506	1.17227e-23	3.94282e-23	Up	NA	NA	NA	K15110//solute carrier family 25 (mitochondrial 2-oxodicarboxylate transporter), member 21;K08803//death-associated protein kinase [EC:2.7.11.1];K02155//V-type H+-transporting ATPase 16kDa proteolipid subunit;K16261//yeast amino acid transporter;K00777	gi|345569820|gb|EGX52646.1|//hypothetical protein AOL_s00007g429 [Arthrobotrys oligospora ATCC 24927]
AOL_s00083g504	2933	0.15	2.5	4.05889	7.96414e-10	1.76392e-09	Up	NA	NA	NA	NA	gi|345564448|gb|EGX47411.1|//hypothetical protein AOL_s00083g504 [Arthrobotrys oligospora ATCC 24927]
AOL_s00215g791	1458	0.27	4.5	4.05889	9.23562e-09	1.95494e-08	Up	NA	NA	NA	K06694//26S proteasome non-ATPase regulatory subunit 10	gi|345559874|gb|EGX43005.1|//hypothetical protein AOL_s00215g791 [Arthrobotrys oligospora ATCC 24927]
AOL_s00097g569	3221	2.15	35.8	4.05755	2.84768e-89	2.36968e-88	Up	NA	NA	NA	NA	gi|345563679|gb|EGX46665.1|//hypothetical protein AOL_s00097g569 [Arthrobotrys oligospora ATCC 24927]
AOL_s00215g487	1824	0.96	15.97	4.05619	4.80574e-34	1.97485e-33	Up	NA	NA	NA	NA	gi|345560626|gb|EGX43751.1|//hypothetical protein AOL_s00215g487 [Arthrobotrys oligospora ATCC 24927]
AOL_s00193g147	1068	1.14	18.87	4.04899	6.13798e-23	2.0293e-22	Up	NA	NA	NA	NA	gi|345561138|gb|EGX44235.1|//hypothetical protein AOL_s00193g147 [Arthrobotrys oligospora ATCC 24927]
AOL_s00054g307	1215	0.33	5.46	4.04836	2.13622e-08	4.43816e-08	Up	NA	NA	NA	NA	gi|345568715|gb|EGX51608.1|//hypothetical protein AOL_s00054g307 [Arthrobotrys oligospora ATCC 24927]
AOL_s00004g323	2043	0.19	3.13	4.04209	2.13622e-08	4.43915e-08	Up	NA	NA	NA	K19668//cellulose 1,4-beta-cellobiosidase [EC:3.2.1.91];K18578//xyloglucan-specific exo-beta-1,4-glucanase [EC:3.2.1.155];K05349//beta-glucosidase [EC:3.2.1.21]	gi|345571476|gb|EGX54290.1|//hypothetical protein AOL_s00004g323 [Arthrobotrys oligospora ATCC 24927]
AOL_s00215g836	2353	0.16	2.63	4.03892	4.72786e-05	8.15541e-05	Up	NA	NA	NA	NA	gi|345559919|gb|EGX43050.1|//hypothetical protein AOL_s00215g836 [Arthrobotrys oligospora ATCC 24927]
AOL_s00006g153	4119	0.56	9.19	4.03657	4.1447e-30	1.5799e-29	Up	NA	NA	NA	K01178//glucoamylase [EC:3.2.1.3];K01183//chitinase [EC:3.2.1.14]	gi|345570466|gb|EGX53287.1|//hypothetical protein AOL_s00006g153 [Arthrobotrys oligospora ATCC 24927]
AOL_s00097g127	1849	7.78	127.15	4.03062	3.12914e-193	5.20778e-192	Up	NA	GO:0003824//catalytic activity	NA	K00949//thiamine pyrophosphokinase [EC:2.7.6.2]	gi|345564100|gb|EGX47081.1|//hypothetical protein AOL_s00097g127 [Arthrobotrys oligospora ATCC 24927]
AOL_s00054g289	1751	1.31	21.31	4.02389	3.1471e-43	1.51503e-42	Up	NA	NA	NA	K05989//alpha-L-rhamnosidase [EC:3.2.1.40]	gi|345568697|gb|EGX51590.1|//hypothetical protein AOL_s00054g289 [Arthrobotrys oligospora ATCC 24927]
AOL_s00054g196	6650	0.34	5.53	4.02367	1.50267e-32	6.0236e-32	Up	NA	GO:0016853//isomerase activity	NA	K01852//lanosterol synthase [EC:5.4.99.7]	gi|345568603|gb|EGX51496.1|//hypothetical protein AOL_s00054g195 [Arthrobotrys oligospora ATCC 24927];gi|345568604|gb|EGX51497.1|//hypothetical protein AOL_s00054g196 [Arthrobotrys oligospora ATCC 24927]
AOL_s00088g15	813	3.1	50.23	4.01821	1.97152e-43	9.5353e-43	Up	NA	NA	NA	NA	gi|345564332|gb|EGX47300.1|//hypothetical protein AOL_s00088g15 [Arthrobotrys oligospora ATCC 24927]
AOL_s00079g388	4546	1.14	18.47	4.01808	1.04685e-98	9.3995e-98	Up	NA	NA	NA	K17648//versiconal hemiacetal acetate esterase [EC:3.1.1.94]	gi|345565800|gb|EGX48748.1|//hypothetical protein AOL_s00079g387 [Arthrobotrys oligospora ATCC 24927];gi|345565801|gb|EGX48749.1|//hypothetical protein AOL_s00079g388 [Arthrobotrys oligospora ATCC 24927]
AOL_s00109g75	1622	0.25	4.02	4.0072	4.37664e-10	9.803e-10	Up	NA	NA	NA	NA	gi|345563503|gb|EGX46503.1|//hypothetical protein AOL_s00109g75 [Arthrobotrys oligospora ATCC 24927]
AOL_s00054g58	256	11.37	182.66	4.00586	3.53936e-35	1.49262e-34	Up	NA	NA	NA	NA	NA
AOL_s00173g309	1502	1.01	16.21	4.00446	5.03502e-21	1.59777e-20	Up	NA	NA	NA	NA	gi|345562136|gb|EGX45208.1|//hypothetical protein AOL_s00173g309 [Arthrobotrys oligospora ATCC 24927]
AOL_s00079g134	3509	4.82	77.3	4.00336	1.32229e-217	2.46968e-216	Up	NA	NA	NA	K17535//serine/threonine-protein kinase TNNI3K [EC:2.7.11.1]	gi|345565966|gb|EGX48913.1|//hypothetical protein AOL_s00079g134 [Arthrobotrys oligospora ATCC 24927]
AOL_s00004g576	10738	4.41	70.72	4.00327	0	0	Up	NA	NA	NA	K16369//phosphatidylethanolamine N-methyltransferase [EC:2.1.1.17]	gi|345571102|gb|EGX53917.1|//hypothetical protein AOL_s00004g576 [Arthrobotrys oligospora ATCC 24927];gi|345571101|gb|EGX53916.1|//hypothetical protein AOL_s00004g575 [Arthrobotrys oligospora ATCC 24927]
AOL_s00081g46	1179	3.24	51.81	3.99916	6.80174e-67	4.48318e-66	Up	NA	NA	NA	NA	gi|345565231|gb|EGX48183.1|//hypothetical protein AOL_s00081g46 [Arthrobotrys oligospora ATCC 24927]
AOL_s00170g67	2070	0.68	10.87	3.99867	8.07196e-29	3.01647e-28	Up	NA	NA	NA	NA	gi|345562291|gb|EGX45360.1|//hypothetical protein AOL_s00170g67 [Arthrobotrys oligospora ATCC 24927]
AOL_s00076g395	2445	0.78	12.46	3.99769	1.13763e-35	4.84585e-35	Up	GO:0016020//membrane	GO:0005215//transporter activity	GO:0006810//transport	K01487//guanine deaminase [EC:3.5.4.3];K08139//MFS transporter, SP family, sugar:H+ symporter;K08150//MFS transporter, SP family, solute carrier family 2 (myo-inositol transporter), member 13	gi|345567108|gb|EGX50044.1|//hypothetical protein AOL_s00076g395 [Arthrobotrys oligospora ATCC 24927];gi|582956599|gb|EWC44825.1|//hypothetical protein DRE_06463 [Drechslerella stenobrocha 248]
AOL_s00054g872	2507	0.99	15.81	3.99727	4.97378e-43	2.38823e-42	Up	NA	NA	NA	K06158//ATP-binding cassette, subfamily F, member 3	gi|345567884|gb|EGX50786.1|//hypothetical protein AOL_s00054g872 [Arthrobotrys oligospora ATCC 24927]
AOL_s00097g445	1398	6.1	97.4	3.99704	1.71055e-160	2.34102e-159	Up	NA	NA	NA	K07088//uncharacterized protein;K00866//choline kinase [EC:2.7.1.32]	gi|345563712|gb|EGX46697.1|//hypothetical protein AOL_s00097g445 [Arthrobotrys oligospora ATCC 24927]
AOL_s00076g74	1048	46.95	749.52	3.99677	0	0	Up	NA	GO:0016772//transferase activity, transferring phosphorus-containing groups	GO:0008152//metabolic process	K00869//mevalonate kinase [EC:2.7.1.36]	gi|345567378|gb|EGX50310.1|//hypothetical protein AOL_s00076g74 [Arthrobotrys oligospora ATCC 24927]
AOL_s00173g75	2360	1.35	21.42	3.98793	7.33228e-66	4.79221e-65	Up	GO:0016020//membrane;GO:0031224//intrinsic component of membrane;GO:0016021//integral component of membrane	GO:0005275//amine transmembrane transporter activity;GO:0015171//amino acid transmembrane transporter activity	GO:0006865//amino acid transport;GO:0003333//amino acid transmembrane transport	K19564//choline transport protein;K09885//aquaporin rerated protein, other eukaryote	gi|345561902|gb|EGX44974.1|//hypothetical protein AOL_s00173g75 [Arthrobotrys oligospora ATCC 24927]
AOL_s00210g254	920	0.22	3.48	3.98351	0.000211106	0.000348047	Up	NA	NA	NA	NA	gi|345560976|gb|EGX44093.1|//hypothetical protein AOL_s00210g254 [Arthrobotrys oligospora ATCC 24927]
AOL_s00007g251	711	3.02	47.75	3.98288	2.1758e-35	9.20911e-35	Up	GO:0005829//cytosol	NA	NA	K11292//transcription elongation factor SPT6	gi|345570090|gb|EGX52915.1|//hypothetical protein AOL_s00007g251 [Arthrobotrys oligospora ATCC 24927]
AOL_s00004g335	1579	3.23	51	3.98089	1.75523e-89	1.46584e-88	Up	GO:0044424//intracellular part	GO:0043169//cation binding;GO:0016829//lyase activity;GO:0016846//carbon-sulfur lyase activity	GO:0044237//cellular metabolic process;GO:0071704//organic substance metabolic process	K01759//lactoylglutathione lyase [EC:4.4.1.5]	gi|345571488|gb|EGX54302.1|//hypothetical protein AOL_s00004g335 [Arthrobotrys oligospora ATCC 24927]
AOL_s00210g29	3119	13.73	214.52	3.96571	0	0	Up	NA	NA	NA	NA	gi|345561042|gb|EGX44157.1|//hypothetical protein AOL_s00210g29 [Arthrobotrys oligospora ATCC 24927]
AOL_s00097g500	2693	3.11	48.4	3.96002	4.1792e-219	7.88464e-218	Up	NA	GO:0000166//nucleotide binding	NA	K14575//AAA family ATPase;K00469//inositol oxygenase [EC:1.13.99.1];K12586//exosome complex component RRP43	gi|345563767|gb|EGX46752.1|//hypothetical protein AOL_s00097g500 [Arthrobotrys oligospora ATCC 24927]
AOL_s00054g889	1262	0.41	6.38	3.95986	4.37664e-10	9.80065e-10	Up	NA	NA	NA	NA	gi|345567901|gb|EGX50803.1|//hypothetical protein AOL_s00054g889 [Arthrobotrys oligospora ATCC 24927]
AOL_s00097g273	2501	1.03	16	3.95736	2.34196e-46	1.19404e-45	Up	NA	NA	NA	NA	gi|345563864|gb|EGX46847.1|//hypothetical protein AOL_s00097g273 [Arthrobotrys oligospora ATCC 24927]
AOL_s00078g589	4483	3.71	57.59	3.95633	5.36028e-169	7.70954e-168	Up	GO:0044464//cell part;GO:0005622//intracellular	GO:0016787//hydrolase activity;GO:0004197//cysteine-type endopeptidase activity	GO:0019538//protein metabolic process	K03243//translation initiation factor 5B;K11294//nucleolin	gi|345566261|gb|EGX49205.1|//hypothetical protein AOL_s00078g589 [Arthrobotrys oligospora ATCC 24927]
AOL_s00076g31	2107	1.39	21.57	3.95587	3.33932e-85	2.67835e-84	Up	NA	NA	NA	K10380//ankyrin	gi|345567550|gb|EGX50481.1|//hypothetical protein AOL_s00076g31 [Arthrobotrys oligospora ATCC 24927]
AOL_s00006g30	383	5.29	82.01	3.95446	1.70631e-25	5.95834e-25	Up	GO:0043231//intracellular membrane-bounded organelle	NA	GO:0006259//DNA metabolic process	K03505//DNA polymerase delta subunit 4	gi|345570884|gb|EGX53702.1|//hypothetical protein AOL_s00006g30 [Arthrobotrys oligospora ATCC 24927]
AOL_s00173g25	1020	5.4	83.56	3.95178	1.53418e-90	1.29282e-89	Up	NA	NA	NA	K03686//molecular chaperone DnaJ;K00100;K00540//null	gi|345561852|gb|EGX44924.1|//hypothetical protein AOL_s00173g25 [Arthrobotrys oligospora ATCC 24927]
AOL_s00075g29	2527	0.45	6.95	3.94902	1.70497e-07	3.3766e-07	Up	NA	NA	NA	NA	gi|345567675|gb|EGX50603.1|//hypothetical protein AOL_s00075g29 [Arthrobotrys oligospora ATCC 24927]
AOL_s00081g179	2659	2.43	37.42	3.94478	4.19988e-119	4.39314e-118	Up	NA	GO:0008270//zinc ion binding;GO:0016491//oxidoreductase activity	GO:0055114//oxidation-reduction process	K17818//D-arabinitol dehydrogenase (NADP+) [EC:1.1.1.287]	gi|345565120|gb|EGX48075.1|//hypothetical protein AOL_s00081g179 [Arthrobotrys oligospora ATCC 24927];gi|345565121|gb|EGX48076.1|//hypothetical protein AOL_s00081g180 [Arthrobotrys oligospora ATCC 24927]
AOL_s00006g473	1865	0.94	14.42	3.93927	6.0625e-31	2.34548e-30	Up	NA	GO:0004175//endopeptidase activity	GO:0019538//protein metabolic process	K01372//bleomycin hydrolase [EC:3.4.22.40]	gi|345570786|gb|EGX53607.1|//hypothetical protein AOL_s00006g473 [Arthrobotrys oligospora ATCC 24927]
AOL_s00188g319	4349	0.09	1.38	3.9386	4.10604e-08	8.42172e-08	Up	NA	NA	NA	K01179//endoglucanase [EC:3.2.1.4];K19668//cellulose 1,4-beta-cellobiosidase [EC:3.2.1.91];K19355//mannan endo-1,4-beta-mannosidase [EC:3.2.1.78];K01181//endo-1,4-beta-xylanase [EC:3.2.1.8]	gi|345561562|gb|EGX44651.1|//hypothetical protein AOL_s00188g319 [Arthrobotrys oligospora ATCC 24927]
AOL_s00080g406	3805	0.99	15.12	3.93289	9.2214e-38	4.0616e-37	Up	NA	NA	GO:0006810//transport	K17866//diphthamide biosynthesis protein 2;K00276//primary-amine oxidase [EC:1.4.3.21];K11231//osomolarity two-component system, sensor histidine kinase SLN1 [EC:2.7.13.3];K02835//peptide chain release factor 1	gi|345565330|gb|EGX48281.1|//hypothetical protein AOL_s00080g406 [Arthrobotrys oligospora ATCC 24927]
AOL_s00076g297	859	1.94	29.61	3.93196	2.43396e-27	8.87153e-27	Up	GO:0044424//intracellular part	GO:0042083//5,10-methylenetetrahydrofolate-dependent methyltransferase activity	GO:0006730//one-carbon metabolic process;GO:0009177//pyrimidine deoxyribonucleoside monophosphate biosynthetic process	K00560//thymidylate synthase [EC:2.1.1.45]	gi|345567288|gb|EGX50222.1|//hypothetical protein AOL_s00076g297 [Arthrobotrys oligospora ATCC 24927]
AOL_s00054g672	1349	0.44	6.7	3.92859	6.3009e-11	1.45899e-10	Up	NA	NA	NA	K07119//uncharacterized protein	gi|345568035|gb|EGX50936.1|//hypothetical protein AOL_s00054g672 [Arthrobotrys oligospora ATCC 24927]
AOL_s00117g55	1840	1.3	19.75	3.92527	3.43194e-63	2.16412e-62	Up	GO:0044464//cell part	GO:0046914//transition metal ion binding	NA	K09465//zinc finger protein BrlA	gi|345562837|gb|EGX45850.1|//hypothetical protein AOL_s00117g55 [Arthrobotrys oligospora ATCC 24927]
AOL_s00079g485	1417	0.22	3.34	3.92427	0.00055882	0.000897811	Up	NA	GO:0030247//polysaccharide binding;GO:0016798//hydrolase activity, acting on glycosyl bonds	GO:0044238//primary metabolic process	K18578//xyloglucan-specific exo-beta-1,4-glucanase [EC:3.2.1.155]	gi|345565898|gb|EGX48846.1|//hypothetical protein AOL_s00079g485 [Arthrobotrys oligospora ATCC 24927]
AOL_s00215g45	3278	6.47	97.91	3.91962	8.0827e-254	1.76833e-252	Up	NA	NA	NA	K02913//large subunit ribosomal protein L33	gi|345560184|gb|EGX43309.1|//hypothetical protein AOL_s00215g45 [Arthrobotrys oligospora ATCC 24927]
AOL_s00080g266	1446	2.87	43.34	3.91658	9.76848e-69	6.5782e-68	Up	NA	NA	NA	NA	gi|345565688|gb|EGX48637.1|//hypothetical protein AOL_s00080g266 [Arthrobotrys oligospora ATCC 24927]
AOL_s00007g107	4094	12.36	186.64	3.91651	0	0	Up	NA	GO:0016740//transferase activity	NA	K03006//DNA-directed RNA polymerase II subunit RPB1 [EC:2.7.7.6];K11238//cytokinesis protein;K05747//Wiskott-Aldrich syndrome protein;K12472//epidermal growth factor receptor substrate 15	gi|345569946|gb|EGX52771.1|//hypothetical protein AOL_s00007g107 [Arthrobotrys oligospora ATCC 24927]
AOL_s00215g70	345	1.33	20.08	3.91626	2.69662e-07	5.29998e-07	Up	GO:0044424//intracellular part	GO:0046914//transition metal ion binding;GO:0051287//NAD binding;GO:0016810//hydrolase activity, acting on carbon-nitrogen (but not peptide) bonds	GO:0016458//gene silencing;GO:0035601//protein deacylation	K14950//cation-transporting ATPase 13A1 [EC:3.6.3.-];K11415//NAD-dependent deacetylase sirtuin 5 [EC:3.5.1.-]	gi|345560209|gb|EGX43334.1|//hypothetical protein AOL_s00215g70 [Arthrobotrys oligospora ATCC 24927]
AOL_s00110g38	1410	54.34	818.94	3.91367	0	0	Up	NA	NA	NA	NA	gi|345563211|gb|EGX46214.1|//hypothetical protein AOL_s00110g38 [Arthrobotrys oligospora ATCC 24927]
AOL_s00054g278	1325	2.14	32.12	3.90779	1.94903e-95	1.70723e-94	Up	NA	GO:0004180//carboxypeptidase activity;GO:0008233//peptidase activity	GO:0019538//protein metabolic process	K01288//carboxypeptidase D [EC:3.4.16.6]	gi|345568686|gb|EGX51579.1|//hypothetical protein AOL_s00054g278 [Arthrobotrys oligospora ATCC 24927]
AOL_s00006g405	1787	6.06	90.89	3.90673	7.9792e-106	7.53456e-105	Up	GO:0044424//intracellular part	NA	NA	K12584//m7GpppX diphosphatase [EC:3.6.1.59]	gi|345570718|gb|EGX53539.1|//hypothetical protein AOL_s00006g405 [Arthrobotrys oligospora ATCC 24927];gi|345570717|gb|EGX53538.1|//hypothetical protein AOL_s00006g404 [Arthrobotrys oligospora ATCC 24927]
AOL_s00043g795	1769	3.32	49.76	3.90573	7.50786e-65	4.83575e-64	Up	GO:0044424//intracellular part;GO:0005829//cytosol	GO:0016763//transferase activity, transferring pentosyl groups;GO:0003999//adenine phosphoribosyltransferase activity	GO:0006168//adenine salvage;GO:0044209//AMP salvage;GO:0043096//purine nucleobase salvage	K00759//adenine phosphoribosyltransferase [EC:2.4.2.7]	gi|345568906|gb|EGX51776.1|//hypothetical protein AOL_s00043g795 [Arthrobotrys oligospora ATCC 24927]
AOL_s00006g163	1215	6.6	98.91	3.90558	3.57028e-128	4.03823e-127	Up	GO:0043231//intracellular membrane-bounded organelle	NA	GO:0009987//cellular process	K02220//G2/mitotic-specific cyclin 1/2	gi|345570476|gb|EGX53297.1|//hypothetical protein AOL_s00006g163 [Arthrobotrys oligospora ATCC 24927]
AOL_s00007g305	1949	2.69	40.15	3.89972	1.15964e-96	1.02347e-95	Up	GO:0031224//intrinsic component of membrane;GO:0016021//integral component of membrane	GO:0005275//amine transmembrane transporter activity;GO:0015171//amino acid transmembrane transporter activity	GO:0006810//transport;GO:0006865//amino acid transport;GO:0003333//amino acid transmembrane transport	K19564//choline transport protein	gi|345570144|gb|EGX52969.1|//hypothetical protein AOL_s00007g305 [Arthrobotrys oligospora ATCC 24927]
AOL_s00080g443	3030	0.13	1.94	3.89947	7.879e-08	1.59186e-07	Up	NA	NA	NA	NA	gi|345565367|gb|EGX48318.1|//hypothetical protein AOL_s00080g443 [Arthrobotrys oligospora ATCC 24927]
AOL_s00169g245	1307	1.43	21.3	3.89677	3.23454e-39	1.45914e-38	Up	NA	NA	NA	K19356//cellulase [EC:3.2.1.4]	gi|345562571|gb|EGX45639.1|//hypothetical protein AOL_s00169g245 [Arthrobotrys oligospora ATCC 24927]
AOL_s00043g20	406	1.22	18.17	3.89661	1.5092e-07	3.00551e-07	Up	NA	GO:0016884//carbon-nitrogen ligase activity, with glutamine as amido-N-donor	GO:0010467//gene expression	K02433//aspartyl-tRNA(Asn)/glutamyl-tRNA(Gln) amidotransferase subunit A [EC:6.3.5.6 6.3.5.7]	gi|345569661|gb|EGX52526.1|//hypothetical protein AOL_s00043g20 [Arthrobotrys oligospora ATCC 24927]
AOL_s00007g445	4672	3.5	52.09	3.89558	6.10322e-275	1.40103e-273	Up	NA	NA	NA	K00344//NADPH2:quinone reductase [EC:1.6.5.5];K00540;K01178//glucoamylase [EC:3.2.1.3]	gi|345569836|gb|EGX52662.1|//hypothetical protein AOL_s00007g445 [Arthrobotrys oligospora ATCC 24927]
AOL_s00078g111	6114	2.93	43.52	3.89271	8.28452e-135	9.76128e-134	Up	NA	NA	NA	K06963//tRNA acetyltransferase TAN1	gi|345566680|gb|EGX49622.1|//hypothetical protein AOL_s00078g111 [Arthrobotrys oligospora ATCC 24927];gi|345566678|gb|EGX49620.1|//hypothetical protein AOL_s00078g109 [Arthrobotrys oligospora ATCC 24927]
AOL_s00076g175	5419	1.58	23.39	3.8879	4.46902e-144	5.56092e-143	Up	NA	GO:0005488//binding	NA	K15710//E3 ubiquitin-protein ligase SHPRH [EC:3.6.4.- 2.3.2.27]	gi|345567479|gb|EGX50411.1|//hypothetical protein AOL_s00076g175 [Arthrobotrys oligospora ATCC 24927]
AOL_s00215g517	4504	1.6	23.55	3.87958	8.97364e-30	3.40669e-29	Up	GO:0043229//intracellular organelle	GO:0000166//nucleotide binding	NA	K02606//origin recognition complex subunit 4	gi|345560656|gb|EGX43781.1|//hypothetical protein AOL_s00215g517 [Arthrobotrys oligospora ATCC 24927]
AOL_s00080g275	607	3.96	58.23	3.87819	8.3197e-70	5.70144e-69	Up	NA	GO:0003676//nucleic acid binding	NA	K07466//replication factor A1	gi|345565697|gb|EGX48646.1|//hypothetical protein AOL_s00080g275 [Arthrobotrys oligospora ATCC 24927]
AOL_s00081g234	4095	0.33	4.85	3.87745	1.2963e-22	4.26307e-22	Up	NA	NA	NA	K10380//ankyrin;K14572//midasin;K01178//glucoamylase [EC:3.2.1.3];K11294//nucleolin;K01183//chitinase [EC:3.2.1.14]	gi|345564951|gb|EGX47907.1|//hypothetical protein AOL_s00081g234 [Arthrobotrys oligospora ATCC 24927]
AOL_s00006g97	3692	1.01	14.84	3.87706	3.52672e-80	2.69639e-79	Up	NA	NA	NA	K17262//tubulin-folding cofactor B;K04648//dynactin 1	gi|345570819|gb|EGX53639.1|//hypothetical protein AOL_s00006g97 [Arthrobotrys oligospora ATCC 24927]
AOL_s00188g312	597	1.86	27.28	3.87447	8.70636e-17	2.436e-16	Up	NA	NA	NA	NA	gi|345561555|gb|EGX44644.1|//hypothetical protein AOL_s00188g312 [Arthrobotrys oligospora ATCC 24927]
AOL_s00004g60	4185	0.9	13.19	3.87338	3.43194e-63	2.16558e-62	Up	NA	NA	NA	K01845//glutamate-1-semialdehyde 2,1-aminomutase [EC:5.4.3.8]	gi|345571213|gb|EGX54027.1|//hypothetical protein AOL_s00004g60 [Arthrobotrys oligospora ATCC 24927]
AOL_s00080g323	1627	1.31	19.08	3.86442	1.53519e-37	6.74267e-37	Up	NA	NA	NA	NA	gi|345565403|gb|EGX48353.1|//hypothetical protein AOL_s00080g323 [Arthrobotrys oligospora ATCC 24927]
AOL_s00078g588	2015	3.72	54.13	3.86305	6.38162e-121	6.78958e-120	Up	NA	NA	NA	NA	gi|345566260|gb|EGX49204.1|//hypothetical protein AOL_s00078g588 [Arthrobotrys oligospora ATCC 24927]
AOL_s00004g630	795	1.14	16.53	3.85798	1.66542e-06	3.14141e-06	Up	NA	NA	NA	K17255//Rab GDP dissociation inhibitor	gi|345571156|gb|EGX53971.1|//hypothetical protein AOL_s00004g630 [Arthrobotrys oligospora ATCC 24927]
AOL_s00210g76	5603	1.37	19.84	3.85616	6.84722e-126	7.59715e-125	Up	NA	NA	NA	NA	gi|345561089|gb|EGX44204.1|//hypothetical protein AOL_s00210g76 [Arthrobotrys oligospora ATCC 24927]
AOL_s00210g40	4073	0.54	7.8	3.85244	9.37428e-27	3.36679e-26	Up	NA	NA	NA	K11269//chromosome transmission fidelity protein 18	gi|345561053|gb|EGX44168.1|//hypothetical protein AOL_s00210g40 [Arthrobotrys oligospora ATCC 24927]
AOL_s00176g88	2522	3.7	53.17	3.84502	3.87754e-193	6.43037e-192	Up	NA	NA	NA	K06694//26S proteasome non-ATPase regulatory subunit 10;K08857//NIMA (never in mitosis gene a)-related kinase [EC:2.7.11.1];K01183//chitinase [EC:3.2.1.14];K08294//mitogen-activated protein kinase kinase [EC:2.7.12.2]	gi|345561730|gb|EGX44806.1|//hypothetical protein AOL_s00176g88 [Arthrobotrys oligospora ATCC 24927]
AOL_s00215g23	4052	0.8	11.49	3.84423	9.96434e-29	3.71917e-28	Up	GO:0043231//intracellular membrane-bounded organelle	GO:0046872//metal ion binding;GO:0046914//transition metal ion binding;GO:0001071//nucleic acid binding transcription factor activity;GO:0003676//nucleic acid binding	GO:0006351//transcription, DNA-templated	K14297//nuclear pore complex protein Nup98-Nup96;K09240//transcriptional regulatory protein CAT8;K09241//transcriptional regulatory protein GAL4;K10838//xeroderma pigmentosum group C-complementing protein	gi|345560162|gb|EGX43287.1|//hypothetical protein AOL_s00215g23 [Arthrobotrys oligospora ATCC 24927]
AOL_s00043g744	1422	0.14	2.01	3.8437	0.00040571	0.000656233	Up	NA	NA	NA	K00511//squalene monooxygenase [EC:1.14.13.132]	gi|345568855|gb|EGX51725.1|//hypothetical protein AOL_s00043g744 [Arthrobotrys oligospora ATCC 24927]
AOL_s00054g445	4297	0.99	14.15	3.83723	6.34402e-50	3.39611e-49	Up	NA	NA	NA	K15110//solute carrier family 25 (mitochondrial 2-oxodicarboxylate transporter), member 21;K10380//ankyrin;K02155//V-type H+-transporting ATPase 16kDa proteolipid subunit;K16261//yeast amino acid transporter;K00777	gi|345568481|gb|EGX51375.1|//hypothetical protein AOL_s00054g445 [Arthrobotrys oligospora ATCC 24927]
AOL_s00210g303	3366	0.11	1.57	3.83519	5.50536e-07	1.06386e-06	Up	NA	NA	NA	K14997//solute carrier family 38 (sodium-coupled neutral amino acid transporter), member 11	gi|345560737|gb|EGX43856.1|//hypothetical protein AOL_s00210g303 [Arthrobotrys oligospora ATCC 24927]
AOL_s00210g197	2615	0.73	10.41	3.83393	3.47042e-31	1.35049e-30	Up	NA	NA	NA	NA	gi|345560919|gb|EGX44036.1|//hypothetical protein AOL_s00210g197 [Arthrobotrys oligospora ATCC 24927]
AOL_s00006g349	410	34.3	488.67	3.83258	9.54788e-172	1.40579e-170	Up	NA	GO:0000166//nucleotide binding;GO:0016641//oxidoreductase activity, acting on the CH-NH2 group of donors, oxygen as acceptor	GO:0008614//pyridoxine metabolic process	K00275//pyridoxamine 5'-phosphate oxidase [EC:1.4.3.5]	gi|345570662|gb|EGX53483.1|//hypothetical protein AOL_s00006g349 [Arthrobotrys oligospora ATCC 24927]
AOL_s00054g731	965	0.74	10.53	3.83084	2.29702e-10	5.19491e-10	Up	NA	NA	NA	NA	gi|345568094|gb|EGX50995.1|//hypothetical protein AOL_s00054g731 [Arthrobotrys oligospora ATCC 24927]
AOL_s00097g429	1074	0.6	8.52	3.82782	1.20387e-10	2.75676e-10	Up	NA	NA	NA	K01581//ornithine decarboxylase [EC:4.1.1.17]	gi|345563815|gb|EGX46799.1|//hypothetical protein AOL_s00097g429 [Arthrobotrys oligospora ATCC 24927]
AOL_s00215g165	470	4.03	57.19	3.82691	4.21052e-25	1.45773e-24	Up	GO:0043234//protein complex	GO:0019787//small conjugating protein transferase activity	GO:0032446//protein modification by small protein conjugation	K10599//pre-mRNA-processing factor 19 [EC:2.3.2.27]	gi|345560304|gb|EGX43429.1|//hypothetical protein AOL_s00215g165 [Arthrobotrys oligospora ATCC 24927]
AOL_s00054g349	2981	0.64	9.03	3.81858	1.07044e-13	2.72805e-13	Up	NA	NA	NA	K18637//axial budding pattern protein 2	gi|345568385|gb|EGX51279.1|//hypothetical protein AOL_s00054g349 [Arthrobotrys oligospora ATCC 24927]
AOL_s00007g170	4351	0.34	4.79	3.81642	5.26476e-32	2.0809e-31	Up	NA	NA	NA	K14644//subtilase-type proteinase RRT12 [EC:3.4.21.-]	gi|345570009|gb|EGX52834.1|//hypothetical protein AOL_s00007g170 [Arthrobotrys oligospora ATCC 24927]
AOL_s00054g226	2783	0.72	10.11	3.81164	1.76674e-33	7.19982e-33	Up	GO:0016020//membrane	GO:0003824//catalytic activity;GO:0043167//ion binding	GO:0044238//primary metabolic process	NA	gi|345568634|gb|EGX51527.1|//hypothetical protein AOL_s00054g226 [Arthrobotrys oligospora ATCC 24927]
AOL_s00043g531	431	1.14	16	3.81097	2.99982e-09	6.47333e-09	Up	GO:0044464//cell part	NA	NA	K10080//lectin, mannose-binding 1	gi|345569273|gb|EGX52141.1|//hypothetical protein AOL_s00043g531 [Arthrobotrys oligospora ATCC 24927]
AOL_s00080g24	430	2.55	35.74	3.80897	1.00929e-13	2.57362e-13	Up	GO:0031224//intrinsic component of membrane;GO:0031966//mitochondrial membrane	GO:0016653//oxidoreductase activity, acting on NAD(P)H, heme protein as acceptor	GO:0008152//metabolic process	K00326//cytochrome-b5 reductase [EC:1.6.2.2]	gi|345565446|gb|EGX48395.1|//hypothetical protein AOL_s00080g24 [Arthrobotrys oligospora ATCC 24927]
AOL_s00081g313	532	14.46	202.06	3.80464	1.9168e-74	1.37632e-73	Up	GO:0030529//ribonucleoprotein complex	GO:0005198//structural molecule activity	GO:0010467//gene expression	K02925//large subunit ribosomal protein L3e	gi|582960542|gb|EWC48705.1|//60S ribosomal protein L3 [Drechslerella stenobrocha 248];gi|345565030|gb|EGX47986.1|//hypothetical protein AOL_s00081g313 [Arthrobotrys oligospora ATCC 24927]
AOL_s00006g116	447	1.67	23.32	3.80365	2.29702e-10	5.19365e-10	Up	NA	GO:0005488//binding	NA	K06883//uncharacterized protein	gi|345570838|gb|EGX53658.1|//hypothetical protein AOL_s00006g116 [Arthrobotrys oligospora ATCC 24927]
AOL_s00097g501	1869	1.34	18.71	3.8035	6.40686e-36	2.74411e-35	Up	NA	NA	NA	K10380//ankyrin;K15110//solute carrier family 25 (mitochondrial 2-oxodicarboxylate transporter), member 21;K01279//tripeptidyl-peptidase I [EC:3.4.14.9];K16261//yeast amino acid transporter;K02155//V-type H+-transporting ATPase 16kDa proteolipid subunit;K00777	gi|345563768|gb|EGX46753.1|//hypothetical protein AOL_s00097g501 [Arthrobotrys oligospora ATCC 24927]
AOL_s00076g528	981	32.61	454.35	3.80042	0	0	Up	NA	NA	NA	NA	gi|345566949|gb|EGX49887.1|//hypothetical protein AOL_s00076g528 [Arthrobotrys oligospora ATCC 24927]
AOL_s00173g59	2945	0.52	7.22	3.79542	8.90966e-22	2.88126e-21	Up	NA	NA	NA	K02321//DNA polymerase alpha subunit B;K11592//endoribonuclease Dicer [EC:3.1.26.-]	gi|345561886|gb|EGX44958.1|//hypothetical protein AOL_s00173g59 [Arthrobotrys oligospora ATCC 24927]
AOL_s00215g600	1937	0.57	7.9	3.79282	1.54175e-09	3.36907e-09	Up	NA	NA	NA	K03188//urease accessory protein	gi|345560098|gb|EGX43226.1|//hypothetical protein AOL_s00215g600 [Arthrobotrys oligospora ATCC 24927]
AOL_s00176g102	1041	2.15	29.72	3.78903	7.81804e-33	3.1502e-32	Up	NA	NA	NA	NA	gi|345561744|gb|EGX44820.1|//hypothetical protein AOL_s00176g102 [Arthrobotrys oligospora ATCC 24927]
AOL_s00088g24	2730	2.44	33.6	3.78351	3.85906e-47	1.98929e-46	Up	NA	NA	NA	K05747//Wiskott-Aldrich syndrome protein	gi|345564341|gb|EGX47309.1|//hypothetical protein AOL_s00088g24 [Arthrobotrys oligospora ATCC 24927];gi|345564340|gb|EGX47308.1|//hypothetical protein AOL_s00088g23 [Arthrobotrys oligospora ATCC 24927]
AOL_s00081g330	3465	0.37	5.09	3.78207	8.9027e-22	2.88001e-21	Up	NA	NA	NA	NA	gi|345565047|gb|EGX48003.1|//hypothetical protein AOL_s00081g330 [Arthrobotrys oligospora ATCC 24927]
AOL_s00078g71	1059	0.68	9.35	3.78136	7.42008e-14	1.89934e-13	Up	NA	NA	NA	K06631//polo-like kinase 1 [EC:2.7.11.21];K06660//cell cycle serine/threonine-protein kinase CDC5/MSD2 [EC:2.7.11.21]	gi|345566640|gb|EGX49582.1|//hypothetical protein AOL_s00078g71 [Arthrobotrys oligospora ATCC 24927]
AOL_s00188g62	5696	13.87	190.43	3.77922	0	0	Up	NA	NA	NA	K03564//peroxiredoxin Q/BCP [EC:1.11.1.15]	gi|345561636|gb|EGX44724.1|//hypothetical protein AOL_s00188g62 [Arthrobotrys oligospora ATCC 24927]
AOL_s00079g463	6101	0.06	0.82	3.77259	1.04818e-06	1.99735e-06	Up	NA	NA	NA	K01179//endoglucanase [EC:3.2.1.4];K19668//cellulose 1,4-beta-cellobiosidase [EC:3.2.1.91];K18578//xyloglucan-specific exo-beta-1,4-glucanase [EC:3.2.1.155];K19356//cellulase [EC:3.2.1.4]	gi|345565876|gb|EGX48824.1|//hypothetical protein AOL_s00079g463 [Arthrobotrys oligospora ATCC 24927]
AOL_s00054g537	1191	0.23	3.14	3.77106	2.92286e-05	5.10898e-05	Up	NA	NA	NA	NA	gi|345568264|gb|EGX51161.1|//hypothetical protein AOL_s00054g537 [Arthrobotrys oligospora ATCC 24927]
AOL_s00006g33	569	4.2	57.31	3.77033	3.44092e-42	1.63037e-41	Up	NA	NA	NA	K10610//DNA damage-binding protein 1	gi|345570887|gb|EGX53705.1|//hypothetical protein AOL_s00006g33 [Arthrobotrys oligospora ATCC 24927]
AOL_s00007g273	430	0.24	3.27	3.76818	8.8215e-05	0.000149784	Up	NA	NA	NA	NA	gi|345570112|gb|EGX52937.1|//hypothetical protein AOL_s00007g273 [Arthrobotrys oligospora ATCC 24927]
AOL_s00043g762	2242	1.79	24.34	3.7653	4.5479e-38	2.01552e-37	Up	NA	NA	NA	K01613//phosphatidylserine decarboxylase [EC:4.1.1.65];K05747//Wiskott-Aldrich syndrome protein	gi|345568873|gb|EGX51743.1|//hypothetical protein AOL_s00043g762 [Arthrobotrys oligospora ATCC 24927]
AOL_s00080g117	2818	1.56	21.15	3.76104	7.88882e-49	4.16094e-48	Up	NA	NA	NA	K10866//DNA repair protein RAD50 [EC:3.6.-.-]	gi|345565539|gb|EGX48488.1|//hypothetical protein AOL_s00080g117 [Arthrobotrys oligospora ATCC 24927]
AOL_s00007g447	2525	0.28	3.79	3.7587	3.56422e-07	6.94948e-07	Up	NA	NA	NA	K15110//solute carrier family 25 (mitochondrial 2-oxodicarboxylate transporter), member 21;K02155//V-type H+-transporting ATPase 16kDa proteolipid subunit;K00777	gi|345569838|gb|EGX52664.1|//hypothetical protein AOL_s00007g447 [Arthrobotrys oligospora ATCC 24927]
AOL_s00007g292	375	3.28	44.38	3.75814	2.06116e-15	5.53284e-15	Up	NA	GO:0003824//catalytic activity	GO:0008152//metabolic process	K04564//superoxide dismutase, Fe-Mn family [EC:1.15.1.1]	gi|345570131|gb|EGX52956.1|//hypothetical protein AOL_s00007g292 [Arthrobotrys oligospora ATCC 24927]
AOL_s00043g421	1274	0.82	11.09	3.75749	1.36762e-18	4.02723e-18	Up	NA	NA	NA	NA	gi|345569163|gb|EGX52031.1|//hypothetical protein AOL_s00043g421 [Arthrobotrys oligospora ATCC 24927]
AOL_s00193g183	1758	0.89	12.03	3.75669	1.03495e-23	3.48473e-23	Up	NA	NA	NA	NA	gi|345561174|gb|EGX44271.1|//hypothetical protein AOL_s00193g183 [Arthrobotrys oligospora ATCC 24927]
AOL_s00097g77	6633	0.79	10.63	3.75015	3.6642e-69	2.47825e-68	Up	NA	NA	NA	K08657//taspase, threonine aspartase, 1 [EC:3.4.25.-]	gi|345564050|gb|EGX47031.1|//hypothetical protein AOL_s00097g77 [Arthrobotrys oligospora ATCC 24927]
AOL_s00007g211	2950	1.03	13.85	3.74917	4.5698e-26	1.61389e-25	Up	NA	NA	NA	K18660//malonyl-CoA/methylmalonyl-CoA synthetase [EC:6.2.1.-]	gi|345570050|gb|EGX52875.1|//hypothetical protein AOL_s00007g211 [Arthrobotrys oligospora ATCC 24927]
AOL_s00176g83	4706	0.32	4.3	3.74819	1.54389e-16	4.29013e-16	Up	NA	NA	NA	NA	gi|345561725|gb|EGX44801.1|//hypothetical protein AOL_s00176g83 [Arthrobotrys oligospora ATCC 24927]
AOL_s00043g462	10389	10.47	140.3	3.74418	2.683e-176	4.02666e-175	Up	NA	NA	NA	K03678//exosome complex component RRP45	gi|345569204|gb|EGX52072.1|//hypothetical protein AOL_s00043g462 [Arthrobotrys oligospora ATCC 24927];gi|345569203|gb|EGX52071.1|//hypothetical protein AOL_s00043g461 [Arthrobotrys oligospora ATCC 24927]
AOL_s00193g184	3555	0.9	11.97	3.73335	1.21253e-46	6.21603e-46	Up	NA	NA	NA	K10352//myosin heavy chain;K04648//dynactin 1;K06675//structural maintenance of chromosome 4;K12472//epidermal growth factor receptor substrate 15;K06687//nucleolar protein involved in exit from mitosis;K10696//E3 ubiquitin-protein ligase BRE1 [EC:2.3.2.27]	gi|345561175|gb|EGX44272.1|//hypothetical protein AOL_s00193g184 [Arthrobotrys oligospora ATCC 24927]
AOL_s00081g180	572	1.52	20.09	3.72433	2.4294e-12	5.92413e-12	Up	NA	GO:0046914//transition metal ion binding;GO:0003824//catalytic activity	GO:0008152//metabolic process	K17818//D-arabinitol dehydrogenase (NADP+) [EC:1.1.1.287]	gi|345565121|gb|EGX48076.1|//hypothetical protein AOL_s00081g180 [Arthrobotrys oligospora ATCC 24927]
AOL_s00054g764	1542	0.25	3.29	3.71809	1.9911e-06	3.74058e-06	Up	NA	NA	NA	NA	gi|345568127|gb|EGX51028.1|//hypothetical protein AOL_s00054g764 [Arthrobotrys oligospora ATCC 24927]
AOL_s00097g308	2603	5.04	66.3	3.71751	5.45032e-114	5.48564e-113	Up	NA	NA	NA	K06674//structural maintenance of chromosome 2;K14326//regulator of nonsense transcripts 1 [EC:3.6.4.-];K14950//cation-transporting ATPase 13A1 [EC:3.6.3.-];K01613//phosphatidylserine decarboxylase [EC:4.1.1.65];K06123//1-acylglycerone phosphate reductase [EC:1.1.1.101]	gi|345563899|gb|EGX46882.1|//hypothetical protein AOL_s00097g308 [Arthrobotrys oligospora ATCC 24927]
AOL_s00054g657	6864	1.02	13.37	3.71236	1.46405e-60	8.97105e-60	Up	GO:0044446//intracellular organelle part	NA	NA	K10352//myosin heavy chain;K11498//centromeric protein E;K10866//DNA repair protein RAD50 [EC:3.6.-.-]	gi|526200171|gb|EPS40814.1|//hypothetical protein H072_5325 [Dactylellina haptotyla CBS 200.50];gi|345568020|gb|EGX50921.1|//hypothetical protein AOL_s00054g657 [Arthrobotrys oligospora ATCC 24927]
AOL_s00173g126	3934	11.57	151.17	3.70771	0	0	Up	NA	GO:0005488//binding	NA	K02365//separase [EC:3.4.22.49];K01684//galactonate dehydratase [EC:4.2.1.6];K09241//transcriptional regulatory protein GAL4;K14824//ribosome biogenesis protein ERB1	gi|345561954|gb|EGX45026.1|//hypothetical protein AOL_s00173g127 [Arthrobotrys oligospora ATCC 24927];gi|345561953|gb|EGX45025.1|//hypothetical protein AOL_s00173g126 [Arthrobotrys oligospora ATCC 24927];gi|526194372|gb|EPS36250.1|//hypothetical protein H072_10341 [Dactylellina haptotyla CBS 200.50]
AOL_s00078g547	2110	0.23	3	3.70526	3.8124e-08	7.84708e-08	Up	NA	NA	NA	K01178//glucoamylase [EC:3.2.1.3];K01183//chitinase [EC:3.2.1.14]	gi|345566219|gb|EGX49163.1|//hypothetical protein AOL_s00078g547 [Arthrobotrys oligospora ATCC 24927]
AOL_s00076g15	6745	8.19	106.74	3.70409	1.25518e-153	1.6688e-152	Up	GO:0031224//intrinsic component of membrane;GO:0016020//membrane	GO:0015405//P-P-bond-hydrolysis-driven transmembrane transporter activity;GO:0000166//nucleotide binding;GO:0032559//adenyl ribonucleotide binding;GO:0017111//nucleoside-triphosphatase activity;GO:0016491//oxidoreductase activity	GO:0006810//transport;GO:0009987//cellular process;GO:0009207//purine ribonucleoside triphosphate catabolic process	K05658//ATP-binding cassette, subfamily B (MDR/TAP), member 1 [EC:3.6.3.44]	gi|345567534|gb|EGX50465.1|//hypothetical protein AOL_s00076g15 [Arthrobotrys oligospora ATCC 24927]
AOL_s00080g96	2110	0.91	11.85	3.70288	2.31276e-19	6.95994e-19	Up	NA	GO:0016787//hydrolase activity	NA	K01210//glucan 1,3-beta-glucosidase [EC:3.2.1.58]	gi|345565518|gb|EGX48467.1|//hypothetical protein AOL_s00080g96 [Arthrobotrys oligospora ATCC 24927]
AOL_s00110g224	1741	2.02	26.3	3.70264	6.33524e-65	4.08612e-64	Up	NA	NA	NA	NA	gi|345563056|gb|EGX46060.1|//hypothetical protein AOL_s00110g224 [Arthrobotrys oligospora ATCC 24927]
AOL_s00170g17	888	2.34	30.45	3.70186	7.40812e-28	2.71826e-27	Up	NA	NA	NA	K10958//DNA repair protein RAD57	gi|345562241|gb|EGX45310.1|//hypothetical protein AOL_s00170g17 [Arthrobotrys oligospora ATCC 24927]
AOL_s00078g509	1657	2.13	27.65	3.69835	1.63893e-50	8.84473e-50	Up	NA	NA	NA	NA	gi|345566533|gb|EGX49476.1|//hypothetical protein AOL_s00078g509 [Arthrobotrys oligospora ATCC 24927]
AOL_s00054g735	760	0.28	3.62	3.69249	1.03697e-06	1.97679e-06	Up	NA	NA	NA	NA	gi|345568098|gb|EGX50999.1|//hypothetical protein AOL_s00054g735 [Arthrobotrys oligospora ATCC 24927]
AOL_s00043g143	3032	2.84	36.69	3.69142	1.90948e-78	1.43288e-77	Up	GO:0031224//intrinsic component of membrane;GO:0043231//intracellular membrane-bounded organelle;GO:0016020//membrane;GO:0031090//organelle membrane	GO:0003824//catalytic activity	GO:0006650//glycerophospholipid metabolic process;GO:0008152//metabolic process;GO:0044238//primary metabolic process	K14676//lysophospholipid hydrolase [EC:3.1.1.5];K18550//IMP and pyridine-specific 5'-nucleotidase [EC:3.1.3.-]	gi|345569488|gb|EGX52354.1|//hypothetical protein AOL_s00043g143 [Arthrobotrys oligospora ATCC 24927]
AOL_s00004g92	3412	1.39	17.95	3.69083	1.53232e-84	1.22062e-83	Up	NA	NA	NA	K19475//WAS/WASL-interacting protein;K18721//nucleoporin NUP1;K01178//glucoamylase [EC:3.2.1.3]	gi|345571245|gb|EGX54059.1|//hypothetical protein AOL_s00004g92 [Arthrobotrys oligospora ATCC 24927]
AOL_s00097g129	2711	0.49	6.32	3.68907	1.47054e-19	4.45705e-19	Up	NA	NA	NA	K10356//myosin I	gi|345564102|gb|EGX47083.1|//hypothetical protein AOL_s00097g129 [Arthrobotrys oligospora ATCC 24927]
AOL_s00043g77	994	0.71	9.13	3.68472	2.29702e-10	5.19239e-10	Up	NA	NA	NA	NA	gi|345569422|gb|EGX52288.1|//hypothetical protein AOL_s00043g77 [Arthrobotrys oligospora ATCC 24927]
AOL_s00007g114	3330	4.35	55.93	3.68454	2.4283e-160	3.31844e-159	Up	NA	GO:0004553//hydrolase activity, hydrolyzing O-glycosyl compounds;GO:0046872//metal ion binding;GO:0015923//mannosidase activity;GO:0046914//transition metal ion binding;GO:0005488//binding	GO:0005975//carbohydrate metabolic process;GO:0019318//hexose metabolic process	K01191//alpha-mannosidase [EC:3.2.1.24]	gi|345569953|gb|EGX52778.1|//hypothetical protein AOL_s00007g114 [Arthrobotrys oligospora ATCC 24927]
AOL_s00004g69	2169	0.35	4.5	3.6845	1.70148e-11	4.02481e-11	Up	NA	NA	NA	NA	gi|345571222|gb|EGX54036.1|//hypothetical protein AOL_s00004g69 [Arthrobotrys oligospora ATCC 24927]
AOL_s00076g68	1300	1.19	15.28	3.68261	2.10598e-20	6.53604e-20	Up	NA	NA	NA	NA	gi|345567372|gb|EGX50304.1|//hypothetical protein AOL_s00076g68 [Arthrobotrys oligospora ATCC 24927]
AOL_s00006g472	1509	3.13	40.19	3.6826	1.17436e-63	7.42541e-63	Up	NA	NA	NA	K01279//tripeptidyl-peptidase I [EC:3.4.14.9];K01178//glucoamylase [EC:3.2.1.3]	gi|345570785|gb|EGX53606.1|//hypothetical protein AOL_s00006g472 [Arthrobotrys oligospora ATCC 24927]
AOL_s00054g35	2086	10.53	135.14	3.68188	4.4831e-283	1.07965e-281	Up	NA	GO:0005488//binding	NA	K09467//zinc-finger protein CreA/MIG	gi|345568744|gb|EGX51636.1|//hypothetical protein AOL_s00054g35 [Arthrobotrys oligospora ATCC 24927]
AOL_s00080g414	3575	2.29	29.34	3.67945	4.82142e-83	3.7761e-82	Up	NA	NA	NA	K00654//serine palmitoyltransferase [EC:2.3.1.50];K11422//histone-lysine N-methyltransferase SETD1 [EC:2.1.1.43]	gi|345565338|gb|EGX48289.1|//hypothetical protein AOL_s00080g414 [Arthrobotrys oligospora ATCC 24927]
AOL_s00083g64	921	0.67	8.58	3.67874	5.6796e-09	1.21019e-08	Up	NA	NA	NA	K11698//centromere protein Sim4	gi|345564596|gb|EGX47556.1|//hypothetical protein AOL_s00083g64 [Arthrobotrys oligospora ATCC 24927]
AOL_s00043g427	3921	0.41	5.25	3.67862	2.87754e-26	1.0205e-25	Up	NA	NA	NA	NA	gi|345569169|gb|EGX52037.1|//hypothetical protein AOL_s00043g427 [Arthrobotrys oligospora ATCC 24927]
AOL_s00079g235	801	10	127.74	3.67514	2.27374e-99	2.04944e-98	Up	NA	NA	NA	NA	gi|345566067|gb|EGX49014.1|//hypothetical protein AOL_s00079g235 [Arthrobotrys oligospora ATCC 24927]
AOL_s00076g154	4433	5.95	75.78	3.67086	7.69908e-226	1.4918e-224	Up	NA	NA	NA	K02213//cell division control protein 6	gi|345567458|gb|EGX50390.1|//hypothetical protein AOL_s00076g154 [Arthrobotrys oligospora ATCC 24927]
AOL_s00076g227	374	1.69	21.47	3.66723	7.879e-08	1.5922e-07	Up	NA	NA	NA	K14285//NTF2-related export protein 1/2	gi|345567329|gb|EGX50262.1|//hypothetical protein AOL_s00076g227 [Arthrobotrys oligospora ATCC 24927]
AOL_s00007g152	2345	1.44	18.25	3.66376	8.79736e-31	3.3965e-30	Up	NA	NA	NA	NA	gi|345569991|gb|EGX52816.1|//hypothetical protein AOL_s00007g152 [Arthrobotrys oligospora ATCC 24927]
AOL_s00110g35	6175	1.93	24.41	3.6608	4.60628e-46	2.33572e-45	Up	NA	NA	NA	K01178//glucoamylase [EC:3.2.1.3]	gi|345563208|gb|EGX46211.1|//hypothetical protein AOL_s00110g35 [Arthrobotrys oligospora ATCC 24927]
AOL_s00054g481	1210	0.37	4.67	3.65783	1.1388e-10	2.61161e-10	Up	NA	NA	NA	K11676//Ino eighty subunit 2;K08737//DNA mismatch repair protein MSH6;K14546//U3 small nucleolar RNA-associated protein 5;K14327//regulator of nonsense transcripts 2	gi|345568350|gb|EGX51245.1|//hypothetical protein AOL_s00054g481 [Arthrobotrys oligospora ATCC 24927]
AOL_s00097g44	4434	0.41	5.17	3.65647	3.58916e-20	1.10912e-19	Up	NA	NA	NA	NA	gi|345564017|gb|EGX46998.1|//hypothetical protein AOL_s00097g44 [Arthrobotrys oligospora ATCC 24927]
AOL_s00188g355	2290	6.04	76.08	3.6549	4.64248e-164	6.47723e-163	Up	NA	NA	NA	K10352//myosin heavy chain;K01487//guanine deaminase [EC:3.5.4.3];K18626//trichohyalin;K08139//MFS transporter, SP family, sugar:H+ symporter	gi|345561360|gb|EGX44450.1|//hypothetical protein AOL_s00188g355 [Arthrobotrys oligospora ATCC 24927]
AOL_s00079g417	2296	0.33	4.15	3.65257	3.2112e-11	7.51969e-11	Up	NA	GO:0004553//hydrolase activity, hydrolyzing O-glycosyl compounds;GO:0003824//catalytic activity	NA	K01181//endo-1,4-beta-xylanase [EC:3.2.1.8]	gi|345565830|gb|EGX48778.1|//hypothetical protein AOL_s00079g417 [Arthrobotrys oligospora ATCC 24927]
AOL_s00080g40	1035	0.28	3.52	3.65208	0.000163951	0.000272764	Up	NA	NA	NA	NA	gi|345565462|gb|EGX48411.1|//hypothetical protein AOL_s00080g40 [Arthrobotrys oligospora ATCC 24927]
AOL_s00215g29	3504	3.3	41.48	3.65188	1.90975e-111	1.87751e-110	Up	GO:0031224//intrinsic component of membrane;GO:0016020//membrane;GO:0019866//organelle inner membrane	NA	GO:0006810//transport	K15104//solute carrier family 25 (mitochondrial oxoglutarate transporter), member 11;K12571//PAB-dependent poly(A)-specific ribonuclease subunit 2 [EC:3.1.13.4]	gi|345560168|gb|EGX43293.1|//hypothetical protein AOL_s00215g29 [Arthrobotrys oligospora ATCC 24927];gi|526201922|gb|EPS42357.1|//hypothetical protein H072_3672 [Dactylellina haptotyla CBS 200.50]
AOL_s00173g365	3227	0.56	7.03	3.65003	1.68995e-21	5.42553e-21	Up	NA	NA	NA	K01785//aldose 1-epimerase [EC:5.1.3.3];K12761//carbon catabolite-derepressing protein kinase [EC:2.7.11.1]	gi|345562192|gb|EGX45264.1|//hypothetical protein AOL_s00173g365 [Arthrobotrys oligospora ATCC 24927]
AOL_s00210g77	6622	0.91	11.41	3.64829	1.46104e-35	6.20643e-35	Up	NA	NA	NA	NA	gi|345561090|gb|EGX44205.1|//hypothetical protein AOL_s00210g77 [Arthrobotrys oligospora ATCC 24927]
AOL_s00043g138	1399	0.57	7.11	3.64082	3.33214e-10	7.49229e-10	Up	NA	NA	NA	K00846//ketohexokinase [EC:2.7.1.3]	gi|345569483|gb|EGX52349.1|//hypothetical protein AOL_s00043g138 [Arthrobotrys oligospora ATCC 24927];gi|526195310|gb|EPS36976.1|//hypothetical protein H072_9440 [Dactylellina haptotyla CBS 200.50]
AOL_s00043g292	1177	0.34	4.24	3.64046	3.77296e-06	6.99085e-06	Up	NA	NA	NA	NA	gi|345569637|gb|EGX52503.1|//hypothetical protein AOL_s00043g292 [Arthrobotrys oligospora ATCC 24927]
AOL_s00054g915	796	0.22	2.74	3.6386	3.96396e-06	7.33309e-06	Up	NA	NA	NA	NA	gi|345567927|gb|EGX50829.1|//hypothetical protein AOL_s00054g915 [Arthrobotrys oligospora ATCC 24927]
AOL_s00215g689	1678	1.68	20.9	3.63697	1.41098e-43	6.83846e-43	Up	GO:0005759//mitochondrial matrix;GO:0044429//mitochondrial part;GO:0005739//mitochondrion	GO:0004042//acetyl-CoA:L-glutamate N-acetyltransferase activity;GO:0004358//glutamate N-acetyltransferase activity;GO:0008080//N-acetyltransferase activity	GO:0006525//arginine metabolic process;GO:0006526//arginine biosynthetic process	K00620//glutamate N-acetyltransferase / amino-acid N-acetyltransferase [EC:2.3.1.35 2.3.1.1]	gi|345559950|gb|EGX43080.1|//hypothetical protein AOL_s00215g689 [Arthrobotrys oligospora ATCC 24927]
AOL_s00007g246	1142	0.3	3.72	3.63227	1.50472e-05	2.68505e-05	Up	NA	NA	NA	K18637//axial budding pattern protein 2;K01183//chitinase [EC:3.2.1.14]	gi|345570085|gb|EGX52910.1|//hypothetical protein AOL_s00007g246 [Arthrobotrys oligospora ATCC 24927]
AOL_s00004g592	2733	0.56	6.94	3.63144	2.04286e-17	5.82959e-17	Up	NA	NA	NA	K10380//ankyrin;K18696//glycerophosphodiester phosphodiesterase [EC:3.1.4.46];K08803//death-associated protein kinase [EC:2.7.11.1]	gi|345571118|gb|EGX53933.1|//hypothetical protein AOL_s00004g592 [Arthrobotrys oligospora ATCC 24927]
AOL_s00080g429	2009	2.33	28.81	3.62817	5.17854e-84	4.10757e-83	Up	NA	GO:0005488//binding	NA	K15110//solute carrier family 25 (mitochondrial 2-oxodicarboxylate transporter), member 21;K02155//V-type H+-transporting ATPase 16kDa proteolipid subunit;K00777	gi|345565353|gb|EGX48304.1|//hypothetical protein AOL_s00080g429 [Arthrobotrys oligospora ATCC 24927]
AOL_s00083g390	2239	6.65	82.12	3.62631	3.42708e-187	5.52602e-186	Up	NA	NA	NA	NA	gi|345564492|gb|EGX47454.1|//hypothetical protein AOL_s00083g390 [Arthrobotrys oligospora ATCC 24927]
AOL_s00043g695	543	5.78	70.95	3.61766	1.09309e-36	4.72086e-36	Up	NA	GO:0003824//catalytic activity	GO:0008152//metabolic process	K07748//sterol-4alpha-carboxylate 3-dehydrogenase (decarboxylating) [EC:1.1.1.170]	gi|345569092|gb|EGX51961.1|//hypothetical protein AOL_s00043g695 [Arthrobotrys oligospora ATCC 24927]
AOL_s00210g223	1101	0.28	3.43	3.61471	3.96396e-06	7.32437e-06	Up	NA	GO:0016787//hydrolase activity;GO:0016798//hydrolase activity, acting on glycosyl bonds	GO:0008152//metabolic process	K14830//protein MAK11;K01183//chitinase [EC:3.2.1.14]	gi|345560945|gb|EGX44062.1|//hypothetical protein AOL_s00210g223 [Arthrobotrys oligospora ATCC 24927]
AOL_s00006g271	405	0.98	11.99	3.61291	2.52478e-05	4.42977e-05	Up	NA	GO:0046872//metal ion binding;GO:0046914//transition metal ion binding;GO:0003824//catalytic activity	GO:0008152//metabolic process	K00002//alcohol dehydrogenase (NADP+) [EC:1.1.1.2]	gi|345570584|gb|EGX53405.1|//hypothetical protein AOL_s00006g271 [Arthrobotrys oligospora ATCC 24927]
AOL_s00054g319	3147	1.49	18.21	3.61135	7.5847e-61	4.66905e-60	Up	NA	NA	NA	K15110//solute carrier family 25 (mitochondrial 2-oxodicarboxylate transporter), member 21;K02155//V-type H+-transporting ATPase 16kDa proteolipid subunit;K00777	gi|345568727|gb|EGX51620.1|//hypothetical protein AOL_s00054g319 [Arthrobotrys oligospora ATCC 24927]
AOL_s00083g373	2053	1.58	19.29	3.60986	6.75394e-27	2.43508e-26	Up	NA	GO:0016614//oxidoreductase activity, acting on CH-OH group of donors;GO:0046872//metal ion binding;GO:0046914//transition metal ion binding;GO:0004033//aldo-keto reductase (NADP) activity;GO:0003824//catalytic activity;GO:0016491//oxidoreductase activity	GO:0008152//metabolic process	K00002//alcohol dehydrogenase (NADP+) [EC:1.1.1.2]	gi|345564475|gb|EGX47437.1|//hypothetical protein AOL_s00083g373 [Arthrobotrys oligospora ATCC 24927]
AOL_s00173g355	3449	0.38	4.63	3.60694	2.01554e-08	4.19304e-08	Up	NA	NA	GO:0006810//transport	K14709//solute carrier family 39 (zinc transporter), member 1/2/3	gi|345562182|gb|EGX45254.1|//hypothetical protein AOL_s00173g355 [Arthrobotrys oligospora ATCC 24927]
AOL_s00054g215	1721	7.03	85.64	3.60669	5.67054e-176	8.49669e-175	Up	NA	NA	NA	K12619//5'-3' exoribonuclease 2 [EC:3.1.13.-];K03469//ribonuclease HI [EC:3.1.26.4];K18716//nucleoporin NUP42	gi|345568623|gb|EGX51516.1|//hypothetical protein AOL_s00054g215 [Arthrobotrys oligospora ATCC 24927]
AOL_s00140g57	2102	0.22	2.68	3.60666	3.8816e-12	9.36973e-12	Up	NA	NA	NA	K03848//alpha-1,3-glucosyltransferase [EC:2.4.1.267];K11244//cell wall integrity and stress response component;K18715//nucleoporin NUP159	gi|345562705|gb|EGX45741.1|//hypothetical protein AOL_s00140g57 [Arthrobotrys oligospora ATCC 24927]
AOL_s00210g305	4727	0.2	2.43	3.60288	2.06284e-15	5.53575e-15	Up	NA	NA	NA	NA	gi|345560739|gb|EGX43858.1|//hypothetical protein AOL_s00210g305 [Arthrobotrys oligospora ATCC 24927]
AOL_s00215g920	506	4.42	53.61	3.60038	1.93001e-25	6.73191e-25	Up	GO:0031224//intrinsic component of membrane	GO:0015075//ion transmembrane transporter activity	GO:0006811//ion transport	K07300//Ca2+:H+ antiporter	gi|345559839|gb|EGX42971.1|//hypothetical protein AOL_s00215g920 [Arthrobotrys oligospora ATCC 24927]
AOL_s00097g278	2754	0.42	5.09	3.5992	6.00064e-16	1.6367e-15	Up	NA	NA	NA	K15503//serine/threonine-protein phosphatase 6 regulatory ankyrin repeat subunit B;K00777;K18932//palmitoyltransferase [EC:2.3.1.225]	gi|345563869|gb|EGX46852.1|//hypothetical protein AOL_s00097g278 [Arthrobotrys oligospora ATCC 24927]
AOL_s00076g511	1566	0.55	6.66	3.59802	1.1388e-10	2.61097e-10	Up	NA	GO:0016787//hydrolase activity;GO:0003824//catalytic activity	GO:0008152//metabolic process	K01181//endo-1,4-beta-xylanase [EC:3.2.1.8]	gi|345566932|gb|EGX49870.1|//hypothetical protein AOL_s00076g511 [Arthrobotrys oligospora ATCC 24927]
AOL_s00081g49	798	0.37	4.48	3.5979	2.52478e-05	4.43061e-05	Up	NA	NA	NA	NA	gi|345565234|gb|EGX48186.1|//hypothetical protein AOL_s00081g49 [Arthrobotrys oligospora ATCC 24927]
AOL_s00080g199	663	0.98	11.86	3.59718	2.02494e-08	4.21072e-08	Up	NA	NA	NA	NA	gi|345565621|gb|EGX48570.1|//hypothetical protein AOL_s00080g199 [Arthrobotrys oligospora ATCC 24927]
AOL_s00054g658	4255	8.5	102.84	3.59679	1.87701e-232	3.7063e-231	Up	NA	NA	NA	K00654//serine palmitoyltransferase [EC:2.3.1.50];K01210//glucan 1,3-beta-glucosidase [EC:3.2.1.58]	gi|345568021|gb|EGX50922.1|//hypothetical protein AOL_s00054g658 [Arthrobotrys oligospora ATCC 24927]
AOL_s00176g29	1586	9.52	114.46	3.58774	6.05306e-165	8.53472e-164	Up	NA	NA	NA	NA	gi|345561783|gb|EGX44858.1|//hypothetical protein AOL_s00176g29 [Arthrobotrys oligospora ATCC 24927]
AOL_s00076g137	2264	0.27	3.23	3.5805	2.9808e-09	6.43527e-09	Up	NA	NA	NA	NA	gi|345567441|gb|EGX50373.1|//hypothetical protein AOL_s00076g137 [Arthrobotrys oligospora ATCC 24927]
AOL_s00080g32	1341	14.13	168.79	3.5784	7.60828e-229	1.48969e-227	Up	NA	NA	NA	NA	gi|345565454|gb|EGX48403.1|//hypothetical protein AOL_s00080g32 [Arthrobotrys oligospora ATCC 24927]
AOL_s00004g97	2986	1.14	13.61	3.57756	1.35977e-43	6.60057e-43	Up	NA	NA	NA	K01939//adenylosuccinate synthase [EC:6.3.4.4];K11541//carbamoyl-phosphate synthase / aspartate carbamoyltransferase [EC:6.3.5.5 2.1.3.2];K13336//peroxin-3	gi|345571250|gb|EGX54064.1|//hypothetical protein AOL_s00004g97 [Arthrobotrys oligospora ATCC 24927]
AOL_s00043g173	3762	1.62	19.27	3.57229	3.80282e-86	3.08731e-85	Up	NA	NA	NA	NA	gi|345569518|gb|EGX52384.1|//hypothetical protein AOL_s00043g173 [Arthrobotrys oligospora ATCC 24927]
AOL_s00004g165	5221	0.74	8.8	3.57191	9.59904e-10	2.11797e-09	Up	NA	NA	NA	NA	gi|345571318|gb|EGX54132.1|//hypothetical protein AOL_s00004g165 [Arthrobotrys oligospora ATCC 24927]
AOL_s00173g118	1907	7.62	90.43	3.56894	7.33788e-82	5.68487e-81	Up	NA	NA	NA	NA	gi|345561945|gb|EGX45017.1|//hypothetical protein AOL_s00173g118 [Arthrobotrys oligospora ATCC 24927]
AOL_s00109g164	2042	0.47	5.57	3.56694	3.83334e-09	8.22628e-09	Up	NA	NA	NA	K15601//lysine-specific demethylase 3 [EC:1.14.11.-]	gi|345563405|gb|EGX46406.1|//hypothetical protein AOL_s00109g164 [Arthrobotrys oligospora ATCC 24927]
AOL_s00097g591	3200	4.96	58.46	3.55904	1.85611e-118	1.93501e-117	Up	NA	NA	NA	K17842//torulene dioxygenase [EC:1.13.11.59]	gi|345563701|gb|EGX46687.1|//hypothetical protein AOL_s00097g591 [Arthrobotrys oligospora ATCC 24927]
AOL_s00080g339	633	0.46	5.4	3.55325	0.000211106	0.000347985	Up	GO:0044464//cell part	GO:0016888//endodeoxyribonuclease activity, producing 5'-phosphomonoesters;GO:0046914//transition metal ion binding;GO:0005488//binding;GO:0004519//endonuclease activity;GO:0003676//nucleic acid binding	GO:0006259//DNA metabolic process	K10771//AP endonuclease 1 [EC:4.2.99.18]	gi|345565419|gb|EGX48369.1|//hypothetical protein AOL_s00080g339 [Arthrobotrys oligospora ATCC 24927]
AOL_s00083g72	3050	2.01	23.54	3.54985	3.30922e-38	1.47147e-37	Up	NA	NA	NA	NA	gi|345564603|gb|EGX47563.1|//hypothetical protein AOL_s00083g71 [Arthrobotrys oligospora ATCC 24927];gi|345564604|gb|EGX47564.1|//hypothetical protein AOL_s00083g72 [Arthrobotrys oligospora ATCC 24927]
AOL_s00079g159	1429	4	46.79	3.54813	2.3155e-93	1.99266e-92	Up	NA	NA	NA	K09602//ubiquitin thioesterase protein OTUB1 [EC:3.4.19.12]	gi|345565991|gb|EGX48938.1|//hypothetical protein AOL_s00079g159 [Arthrobotrys oligospora ATCC 24927]
AOL_s00054g769	4551	2.79	32.63	3.54786	4.6748e-130	5.33935e-129	Up	GO:0043231//intracellular membrane-bounded organelle	GO:0032559//adenyl ribonucleotide binding;GO:0016462//pyrophosphatase activity;GO:0000166//nucleotide binding;GO:0004386//helicase activity;GO:0003676//nucleic acid binding	GO:0006260//DNA replication;GO:0006259//DNA metabolic process	K02210//DNA replication licensing factor MCM7 [EC:3.6.4.12]	gi|345568132|gb|EGX51033.1|//hypothetical protein AOL_s00054g769 [Arthrobotrys oligospora ATCC 24927]
AOL_s00007g58	2945	0.4	4.67	3.54535	1.71982e-19	5.19568e-19	Up	NA	NA	NA	NA	gi|345570285|gb|EGX53109.1|//hypothetical protein AOL_s00007g58 [Arthrobotrys oligospora ATCC 24927]
AOL_s00080g350	2817	7.88	91.96	3.54474	6.16402e-276	1.42907e-274	Up	NA	NA	NA	K07566//L-threonylcarbamoyladenylate synthase [EC:2.7.7.87]	gi|345565274|gb|EGX48225.1|//hypothetical protein AOL_s00080g350 [Arthrobotrys oligospora ATCC 24927]
AOL_s00007g20	3212	1.77	20.65	3.54432	9.58796e-70	6.56092e-69	Up	NA	NA	NA	NA	gi|345570247|gb|EGX53071.1|//hypothetical protein AOL_s00007g20 [Arthrobotrys oligospora ATCC 24927]
AOL_s00215g766	2763	0.6	6.99	3.54226	1.88475e-28	7.00114e-28	Up	NA	GO:0043167//ion binding;GO:0016798//hydrolase activity, acting on glycosyl bonds	GO:0008152//metabolic process;GO:0044238//primary metabolic process	K01176//alpha-amylase [EC:3.2.1.1]	gi|345559849|gb|EGX42980.1|//hypothetical protein AOL_s00215g766 [Arthrobotrys oligospora ATCC 24927]
AOL_s00006g212	2900	8.42	98.03	3.54133	0	0	Up	GO:0031224//intrinsic component of membrane;GO:0005794//Golgi apparatus;GO:0016021//integral component of membrane	GO:0015200//methylammonium transmembrane transporter activity;GO:0015101//organic cation transmembrane transporter activity;GO:0015398//high-affinity secondary active ammonium transmembrane transporter activity	GO:0001403//invasive growth in response to glucose limitation;GO:0072489//methylammonium transmembrane transport;GO:0015696//ammonium transport	K03320//ammonium transporter, Amt family	gi|345570525|gb|EGX53346.1|//hypothetical protein AOL_s00006g212 [Arthrobotrys oligospora ATCC 24927]
AOL_s00083g274	4232	2.69	31.21	3.53633	2.01224e-59	1.21307e-58	Up	NA	GO:0016211//ammonia ligase activity;GO:0032559//adenyl ribonucleotide binding;GO:0000166//nucleotide binding	GO:0006541//glutamine metabolic process	K01915//glutamine synthetase [EC:6.3.1.2]	gi|345564806|gb|EGX47766.1|//hypothetical protein AOL_s00083g274 [Arthrobotrys oligospora ATCC 24927]
AOL_s00080g118	2939	25.49	295.69	3.53608	0	0	Up	NA	GO:0003824//catalytic activity	GO:0008152//metabolic process	K01613//phosphatidylserine decarboxylase [EC:4.1.1.65]	gi|345565540|gb|EGX48489.1|//hypothetical protein AOL_s00080g118 [Arthrobotrys oligospora ATCC 24927]
AOL_s00007g287	3840	50.32	583.18	3.53474	0	0	Up	NA	GO:0046872//metal ion binding;GO:0000166//nucleotide binding;GO:0005506//iron ion binding;GO:0016653//oxidoreductase activity, acting on NAD(P)H, heme protein as acceptor;GO:0004497//monooxygenase activity;GO:0016712//oxidoreductase activity, acting on paired donors, with incorporation or reduction of molecular oxygen, reduced flavin or flavoprotein as one donor, and incorporation of one atom of …	GO:0008152//metabolic process	K14338//cytochrome P450 / NADPH-cytochrome P450 reductase [EC:1.14.14.1 1.6.2.4]	gi|345570126|gb|EGX52951.1|//hypothetical protein AOL_s00007g287 [Arthrobotrys oligospora ATCC 24927]
AOL_s00110g137	2290	9.59	111.08	3.53392	1.50434e-181	2.34455e-180	Up	GO:0043234//protein complex	GO:0016728//oxidoreductase activity, acting on CH or CH2 groups, disulfide as acceptor;GO:0032559//adenyl ribonucleotide binding	GO:0006259//DNA metabolic process	K10807//ribonucleoside-diphosphate reductase subunit M1 [EC:1.17.4.1]	gi|345563310|gb|EGX46313.1|//hypothetical protein AOL_s00110g137 [Arthrobotrys oligospora ATCC 24927]
AOL_s00075g201	210	16	185.08	3.53201	4.14528e-25	1.43621e-24	Up	NA	GO:0004601//peroxidase activity	GO:0008152//metabolic process;GO:0006950//response to stress	K00432//glutathione peroxidase [EC:1.11.1.9]	gi|345567636|gb|EGX50565.1|//hypothetical protein AOL_s00075g201 [Arthrobotrys oligospora ATCC 24927]
AOL_s00007g398	2052	0.38	4.38	3.52686	2.1396e-10	4.84712e-10	Up	NA	NA	NA	NA	gi|345569789|gb|EGX52615.1|//hypothetical protein AOL_s00007g398 [Arthrobotrys oligospora ATCC 24927]
AOL_s00004g528	4382	11.29	129.6	3.52095	0	0	Up	NA	NA	NA	K17263//cullin-associated NEDD8-dissociated protein 1	gi|345571054|gb|EGX53869.1|//hypothetical protein AOL_s00004g528 [Arthrobotrys oligospora ATCC 24927]
AOL_s00043g613	4749	43.06	492.76	3.51646	0	0	Up	NA	GO:0016879//ligase activity, forming carbon-nitrogen bonds;GO:0003989//acetyl-CoA carboxylase activity;GO:0004075//biotin carboxylase activity;GO:0046872//metal ion binding;GO:0005524//ATP binding;GO:0032559//adenyl ribonucleotide binding;GO:0016421//CoA carboxylase activity	GO:0006631//fatty acid metabolic process;GO:0006633//fatty acid biosynthetic process	K11262//acetyl-CoA carboxylase / biotin carboxylase 1 [EC:6.4.1.2 6.3.4.14]	gi|662539921|gb|KEQ97223.1|//hypothetical protein AUEXF2481DRAFT_3056 [Aureobasidium subglaciale EXF-2481];gi|345569010|gb|EGX51879.1|//hypothetical protein AOL_s00043g613 [Arthrobotrys oligospora ATCC 24927]
AOL_s00109g179	636	2.51	28.69	3.51479	1.22984e-17	3.53223e-17	Up	GO:0043231//intracellular membrane-bounded organelle;GO:0043234//protein complex;GO:0016592//mediator complex;GO:0005829//cytosol	GO:0001104//RNA polymerase II transcription cofactor activity	GO:0006357//regulation of transcription from RNA polymerase II promoter	K15153//mediator of RNA polymerase II transcription subunit 31	gi|345563420|gb|EGX46421.1|//hypothetical protein AOL_s00109g179 [Arthrobotrys oligospora ATCC 24927]
AOL_s00079g58	1975	0.85	9.71	3.51394	1.09509e-25	3.83836e-25	Up	NA	NA	NA	NA	gi|345566158|gb|EGX49104.1|//hypothetical protein AOL_s00079g58 [Arthrobotrys oligospora ATCC 24927]
AOL_s00076g92	3189	0.17	1.94	3.51245	3.89892e-06	7.2185e-06	Up	NA	NA	NA	K10380//ankyrin;K06694//26S proteasome non-ATPase regulatory subunit 10	gi|345567396|gb|EGX50328.1|//hypothetical protein AOL_s00076g92 [Arthrobotrys oligospora ATCC 24927]
AOL_s00215g675	1884	0.41	4.66	3.50663	1.40485e-09	3.07786e-09	Up	NA	NA	NA	NA	gi|345560090|gb|EGX43219.1|//hypothetical protein AOL_s00215g675 [Arthrobotrys oligospora ATCC 24927]
AOL_s00054g969	523	1.79	20.34	3.50629	2.1396e-10	4.8483e-10	Up	NA	NA	NA	NA	gi|345567981|gb|EGX50883.1|//hypothetical protein AOL_s00054g969 [Arthrobotrys oligospora ATCC 24927]
AOL_s00081g315	5286	4.24	48.12	3.5045	2.8422e-193	4.73869e-192	Up	NA	NA	NA	NA	gi|345565032|gb|EGX47988.1|//hypothetical protein AOL_s00081g315 [Arthrobotrys oligospora ATCC 24927]
AOL_s00215g674	522	1.72	19.51	3.50373	1.20387e-10	2.75609e-10	Up	NA	NA	NA	NA	gi|345560089|gb|EGX43218.1|//hypothetical protein AOL_s00215g674 [Arthrobotrys oligospora ATCC 24927]
AOL_s00054g650	610	1.09	12.35	3.50211	7.1629e-08	1.45158e-07	Up	NA	GO:0003824//catalytic activity	GO:0051716//cellular response to stimulus;GO:0008152//metabolic process	K07443//methylated-DNA-protein-cysteine methyltransferase related protein	gi|345568013|gb|EGX50914.1|//hypothetical protein AOL_s00054g650 [Arthrobotrys oligospora ATCC 24927]
AOL_s00076g541	5061	2.5	28.13	3.49211	3.41076e-44	1.67837e-43	Up	NA	NA	NA	NA	gi|345566962|gb|EGX49900.1|//hypothetical protein AOL_s00076g541 [Arthrobotrys oligospora ATCC 24927]
AOL_s00083g393	1428	0.28	3.15	3.49185	1.34382e-05	2.409e-05	Up	NA	NA	NA	NA	gi|345564495|gb|EGX47457.1|//hypothetical protein AOL_s00083g393 [Arthrobotrys oligospora ATCC 24927]
AOL_s00210g33	3348	0.58	6.51	3.48853	1.51067e-32	6.05309e-32	Up	NA	GO:0004553//hydrolase activity, hydrolyzing O-glycosyl compounds	GO:0009056//catabolic process	K01180//endo-1,3(4)-beta-glucanase [EC:3.2.1.6]	gi|345561046|gb|EGX44161.1|//hypothetical protein AOL_s00210g33 [Arthrobotrys oligospora ATCC 24927]
AOL_s00193g146	1701	1.32	14.81	3.48796	1.70099e-49	9.05382e-49	Up	NA	NA	NA	K05351//D-xylulose reductase [EC:1.1.1.9]	gi|345561322|gb|EGX44418.1|//hypothetical protein AOL_s00193g146 [Arthrobotrys oligospora ATCC 24927]
AOL_s00083g306	1817	2.21	24.72	3.48356	3.52218e-50	1.89203e-49	Up	NA	NA	NA	K01183//chitinase [EC:3.2.1.14]	gi|345564838|gb|EGX47798.1|//hypothetical protein AOL_s00083g306 [Arthrobotrys oligospora ATCC 24927]
AOL_s00079g209	3739	1.2	13.41	3.4822	1.69925e-50	9.15966e-50	Up	NA	NA	NA	K18757//la-related protein 1	gi|345566041|gb|EGX48988.1|//hypothetical protein AOL_s00079g209 [Arthrobotrys oligospora ATCC 24927]
AOL_s00007g25	2500	0.61	6.8	3.47865	1.69575e-18	4.97933e-18	Up	NA	NA	NA	NA	gi|345570252|gb|EGX53076.1|//hypothetical protein AOL_s00007g25 [Arthrobotrys oligospora ATCC 24927]
AOL_s00176g28	2656	0.14	1.56	3.47805	2.52478e-05	4.43144e-05	Up	NA	NA	NA	NA	gi|345561782|gb|EGX44857.1|//hypothetical protein AOL_s00176g28 [Arthrobotrys oligospora ATCC 24927]
AOL_s00080g355	2056	18.46	205.46	3.47638	0	0	Up	NA	NA	NA	NA	gi|345565279|gb|EGX48230.1|//hypothetical protein AOL_s00080g355 [Arthrobotrys oligospora ATCC 24927]
AOL_s00080g95	891	0.93	10.35	3.47626	7.51542e-10	1.66612e-09	Up	NA	NA	NA	NA	gi|345565517|gb|EGX48466.1|//hypothetical protein AOL_s00080g95 [Arthrobotrys oligospora ATCC 24927]
AOL_s00170g33	4173	40.99	455.88	3.47531	0	0	Up	NA	NA	NA	K01183//chitinase [EC:3.2.1.14]	gi|345562257|gb|EGX45326.1|//hypothetical protein AOL_s00170g33 [Arthrobotrys oligospora ATCC 24927]
AOL_s00083g51	1383	4.01	44.59	3.47505	2.81794e-61	1.7439e-60	Up	NA	GO:0000166//nucleotide binding;GO:0003774//motor activity	NA	K10395//kinesin family member 4/21/27	gi|345564880|gb|EGX47839.1|//hypothetical protein AOL_s00083g51 [Arthrobotrys oligospora ATCC 24927]
AOL_s00173g61	2452	3.26	36.2	3.47305	2.25068e-145	2.81562e-144	Up	NA	GO:0046872//metal ion binding	NA	K00540;K03107//signal recognition particle subunit SRP68	gi|345561888|gb|EGX44960.1|//hypothetical protein AOL_s00173g61 [Arthrobotrys oligospora ATCC 24927]
AOL_s00173g244	3244	2.62	29.09	3.47288	4.61156e-79	3.49145e-78	Up	NA	NA	NA	K14326//regulator of nonsense transcripts 1 [EC:3.6.4.-];K11699//RNA-dependent RNA polymerase [EC:2.7.7.48]	gi|345562071|gb|EGX45143.1|//hypothetical protein AOL_s00173g244 [Arthrobotrys oligospora ATCC 24927]
AOL_s00097g396	901	0.88	9.76	3.47131	8.15022e-07	1.55975e-06	Up	NA	NA	NA	NA	gi|345563782|gb|EGX46766.1|//hypothetical protein AOL_s00097g396 [Arthrobotrys oligospora ATCC 24927]
AOL_s00097g378	1545	3.38	37.45	3.46987	3.15802e-58	1.87589e-57	Up	NA	NA	NA	K01120//3',5'-cyclic-nucleotide phosphodiesterase [EC:3.1.4.17];K03233//elongation factor 1-gamma	gi|345563969|gb|EGX46952.1|//hypothetical protein AOL_s00097g378 [Arthrobotrys oligospora ATCC 24927]
AOL_s00079g170	2122	0.19	2.1	3.46632	1.10964e-08	2.33978e-08	Up	NA	GO:0005488//binding	NA	K15110//solute carrier family 25 (mitochondrial 2-oxodicarboxylate transporter), member 21;K17095//annexin A7/11;K08486//syntaxin 1B/2/3;K12609//CCR4-NOT transcriptional complex subunit CAF120;K02155//V-type H+-transporting ATPase 16kDa proteolipid subunit;K00777	gi|345566002|gb|EGX48949.1|//hypothetical protein AOL_s00079g170 [Arthrobotrys oligospora ATCC 24927]
AOL_s00112g39	598	1.79	19.77	3.46528	5.6796e-09	1.20964e-08	Up	GO:0044424//intracellular part	GO:0016829//lyase activity	GO:0006779//porphyrin-containing compound biosynthetic process	K01772//ferrochelatase [EC:4.99.1.1]	gi|345562954|gb|EGX45961.1|//hypothetical protein AOL_s00112g39 [Arthrobotrys oligospora ATCC 24927]
AOL_s00043g243	3319	12.48	137.38	3.46048	0	0	Up	NA	NA	NA	K11593//eukaryotic translation initiation factor 2C	gi|345569588|gb|EGX52454.1|//hypothetical protein AOL_s00043g243 [Arthrobotrys oligospora ATCC 24927]
AOL_s00176g31	465	5.72	62.96	3.46035	1.4368e-70	9.91193e-70	Up	NA	NA	NA	K18065//Cdc25 family phosphatase [EC:3.1.3.48 1.20.4.-]	gi|345561785|gb|EGX44860.1|//hypothetical protein AOL_s00176g31 [Arthrobotrys oligospora ATCC 24927]
AOL_s00117g40	1575	0.84	9.24	3.45943	1.36441e-40	6.2952e-40	Up	NA	NA	GO:0008152//metabolic process	K15110//solute carrier family 25 (mitochondrial 2-oxodicarboxylate transporter), member 21;K02155//V-type H+-transporting ATPase 16kDa proteolipid subunit;K00777;K03255//protein TIF31	gi|345562822|gb|EGX45835.1|//hypothetical protein AOL_s00117g40 [Arthrobotrys oligospora ATCC 24927]
AOL_s00043g350	1214	11.16	122.13	3.45201	4.19882e-282	1.00599e-280	Up	NA	NA	NA	NA	gi|345569340|gb|EGX52207.1|//hypothetical protein AOL_s00043g350 [Arthrobotrys oligospora ATCC 24927]
AOL_s00078g442	2281	2.01	21.97	3.45027	2.3117e-23	7.71671e-23	Up	NA	GO:0003824//catalytic activity	NA	K01908//propionyl-CoA synthetase [EC:6.2.1.17];K01897//long-chain acyl-CoA synthetase [EC:6.2.1.3];K17806//mitochondrial import inner membrane translocase subunit TIM23;K01904//4-coumarate--CoA ligase [EC:6.2.1.12];K14818//ribosome assembly protein SQT1	gi|345566466|gb|EGX49409.1|//hypothetical protein AOL_s00078g442 [Arthrobotrys oligospora ATCC 24927]
AOL_s00169g242	1271	4.83	52.66	3.44661	6.36494e-80	4.85047e-79	Up	NA	NA	NA	K14838//nucleolar protein 15;K03504//DNA polymerase delta subunit 3;K09283//high mobility group AT-hook protein 2;K11493//regulator of chromosome condensation	gi|345562568|gb|EGX45636.1|//hypothetical protein AOL_s00169g242 [Arthrobotrys oligospora ATCC 24927]
AOL_s00006g51	541	0.92	10.01	3.44366	7.13062e-06	1.29622e-05	Up	NA	GO:0046914//transition metal ion binding;GO:0003824//catalytic activity	GO:0008152//metabolic process	K00344//NADPH2:quinone reductase [EC:1.6.5.5]	gi|345570842|gb|EGX53661.1|//hypothetical protein AOL_s00006g51 [Arthrobotrys oligospora ATCC 24927]
AOL_s00007g520	1598	5.51	59.91	3.44267	4.10186e-95	3.58624e-94	Up	GO:0044464//cell part	GO:0050136//NADH dehydrogenase (quinone) activity;GO:0043169//cation binding;GO:0051536//iron-sulfur cluster binding	GO:0022904//respiratory electron transport chain	K03934//NADH dehydrogenase (ubiquinone) Fe-S protein 1 [EC:1.6.5.3 1.6.99.3]	gi|345569911|gb|EGX52737.1|//hypothetical protein AOL_s00007g520 [Arthrobotrys oligospora ATCC 24927];gi|526197705|gb|EPS38948.1|//hypothetical protein H072_7271 [Dactylellina haptotyla CBS 200.50]
AOL_s00215g756	2389	2.82	30.66	3.44259	5.6691e-72	3.97263e-71	Up	NA	NA	NA	K01078//acid phosphatase [EC:3.1.3.2]	gi|345560017|gb|EGX43147.1|//hypothetical protein AOL_s00215g756 [Arthrobotrys oligospora ATCC 24927]
AOL_s00169g115	1796	0.85	9.24	3.44236	5.89722e-18	1.70902e-17	Up	NA	NA	NA	K09265//MADS-box transcription factor, other eukaryote	gi|345562441|gb|EGX45509.1|//hypothetical protein AOL_s00169g115 [Arthrobotrys oligospora ATCC 24927]
AOL_s00006g351	14193	10.61	115.13	3.43977	0	0	Up	NA	NA	NA	K00275//pyridoxamine 5'-phosphate oxidase [EC:1.4.3.5]	gi|345570663|gb|EGX53484.1|//hypothetical protein AOL_s00006g350 [Arthrobotrys oligospora ATCC 24927];gi|345570664|gb|EGX53485.1|//hypothetical protein AOL_s00006g351 [Arthrobotrys oligospora ATCC 24927]
AOL_s00078g357	823	3.06	33.2	3.43958	2.8307e-26	1.00427e-25	Up	GO:0044424//intracellular part	GO:0003824//catalytic activity	NA	K01515//ADP-ribose pyrophosphatase [EC:3.6.1.13]	gi|345566381|gb|EGX49324.1|//hypothetical protein AOL_s00078g357 [Arthrobotrys oligospora ATCC 24927]
AOL_s00054g154	1574	0.87	9.4	3.43357	1.74711e-11	4.12856e-11	Up	NA	NA	NA	K17648//versiconal hemiacetal acetate esterase [EC:3.1.1.94]	gi|345568562|gb|EGX51455.1|//hypothetical protein AOL_s00054g154 [Arthrobotrys oligospora ATCC 24927]
AOL_s00007g177	2075	6.78	73.25	3.43347	2.95126e-162	4.09312e-161	Up	NA	NA	GO:0006810//transport;GO:0042221//response to chemical	NA	gi|345570016|gb|EGX52841.1|//hypothetical protein AOL_s00007g177 [Arthrobotrys oligospora ATCC 24927]
AOL_s00080g440	2576	10.39	111.64	3.42559	4.1936e-288	1.03948e-286	Up	NA	NA	NA	NA	gi|345565364|gb|EGX48315.1|//hypothetical protein AOL_s00080g440 [Arthrobotrys oligospora ATCC 24927]
AOL_s00083g384	6754	9.32	100.07	3.42454	1.44877e-232	2.86677e-231	Up	NA	NA	NA	K01115//phospholipase D1/2 [EC:3.1.4.4]	gi|345564486|gb|EGX47448.1|//hypothetical protein AOL_s00083g384 [Arthrobotrys oligospora ATCC 24927]
AOL_s00076g539	2683	1.28	13.68	3.41785	1.71153e-26	6.10934e-26	Up	NA	NA	NA	NA	gi|345566960|gb|EGX49898.1|//hypothetical protein AOL_s00076g539 [Arthrobotrys oligospora ATCC 24927]
AOL_s00081g123	1554	2.71	28.93	3.4162	1.2955e-81	1.002e-80	Up	NA	NA	NA	NA	gi|345565174|gb|EGX48127.1|//hypothetical protein AOL_s00081g123 [Arthrobotrys oligospora ATCC 24927]
AOL_s00188g341	11099	0.85	9.06	3.41398	4.94134e-104	4.61456e-103	Up	NA	NA	NA	K10380//ankyrin;K16726//ankyrin repeat domain-containing protein 17	gi|345561346|gb|EGX44436.1|//hypothetical protein AOL_s00188g341 [Arthrobotrys oligospora ATCC 24927]
AOL_s00083g273	721	16.94	180.52	3.41365	2.0926e-116	2.15265e-115	Up	NA	GO:0003824//catalytic activity	GO:0008152//metabolic process	K18337//L-rhamnose 1-dehydrogenase [EC:1.1.1.378 1.1.1.377 1.1.1.173]	gi|345564805|gb|EGX47765.1|//hypothetical protein AOL_s00083g273 [Arthrobotrys oligospora ATCC 24927]
AOL_s00043g629	526	14.9	158.37	3.40991	2.59788e-84	2.06413e-83	Up	NA	NA	NA	K12860//pre-mRNA-splicing factor CDC5/CEF1	gi|345569026|gb|EGX51895.1|//hypothetical protein AOL_s00043g629 [Arthrobotrys oligospora ATCC 24927]
AOL_s00210g332	2582	10.2	108.17	3.40666	6.82024e-239	1.4001e-237	Up	GO:0044424//intracellular part;GO:0005737//cytoplasm	GO:0046872//metal ion binding;GO:0005524//ATP binding;GO:0032559//adenyl ribonucleotide binding;GO:0004824//lysine-tRNA ligase activity;GO:0004812//aminoacyl-tRNA ligase activity;GO:0003676//nucleic acid binding	GO:0006430//lysyl-tRNA aminoacylation;GO:0006418//tRNA aminoacylation for protein translation	K04567//lysyl-tRNA synthetase, class II [EC:6.1.1.6]	gi|345560766|gb|EGX43885.1|//hypothetical protein AOL_s00210g332 [Arthrobotrys oligospora ATCC 24927]
AOL_s00109g94	2728	4.71	49.89	3.40495	3.50236e-56	2.02494e-55	Up	GO:0044464//cell part	NA	GO:0051234//establishment of localization	K12346//metal iron transporter	gi|345563522|gb|EGX46522.1|//hypothetical protein AOL_s00109g94 [Arthrobotrys oligospora ATCC 24927]
AOL_s00078g300	1793	0.43	4.55	3.40346	9.1059e-09	1.92836e-08	Up	NA	GO:0004175//endopeptidase activity	GO:0019538//protein metabolic process;GO:0009056//catabolic process	K01210//glucan 1,3-beta-glucosidase [EC:3.2.1.58];K01183//chitinase [EC:3.2.1.14]	gi|345566324|gb|EGX49267.1|//hypothetical protein AOL_s00078g300 [Arthrobotrys oligospora ATCC 24927]
AOL_s00083g188	863	2.7	28.55	3.40246	2.39348e-25	8.32981e-25	Up	NA	NA	NA	NA	gi|345564720|gb|EGX47680.1|//hypothetical protein AOL_s00083g188 [Arthrobotrys oligospora ATCC 24927]
AOL_s00081g245	858	73.44	773.58	3.39691	0	0	Up	NA	NA	NA	NA	gi|345564962|gb|EGX47918.1|//hypothetical protein AOL_s00081g245 [Arthrobotrys oligospora ATCC 24927]
AOL_s00170g40	2004	1.47	15.46	3.39465	7.10444e-39	3.18487e-38	Up	NA	NA	NA	NA	gi|345562264|gb|EGX45333.1|//hypothetical protein AOL_s00170g40 [Arthrobotrys oligospora ATCC 24927]
AOL_s00097g233	1030	0.47	4.94	3.39378	5.86176e-24	1.98156e-23	Up	NA	NA	NA	K00517;K00540//null;K17475//tryprostatin B 6-hydroxylase [EC:1.14.13.176];K07824//benzoate 4-monooxygenase [EC:1.14.13.12]	gi|345564012|gb|EGX46994.1|//hypothetical protein AOL_s00097g233 [Arthrobotrys oligospora ATCC 24927]
AOL_s00215g841	2244	2.23	23.43	3.39324	4.27076e-49	2.25899e-48	Up	NA	NA	NA	K10590//E3 ubiquitin-protein ligase TRIP12 [EC:2.3.2.26];K00916//CTD kinase subunit alpha [EC:2.7.11.22 2.7.11.23];K11294//nucleolin	gi|345559924|gb|EGX43055.1|//hypothetical protein AOL_s00215g841 [Arthrobotrys oligospora ATCC 24927]
AOL_s00043g291	1860	0.73	7.66	3.39138	3.39908e-15	9.05903e-15	Up	NA	NA	NA	K01166//ribonuclease T2 [EC:3.1.27.1]	gi|345569636|gb|EGX52502.1|//hypothetical protein AOL_s00043g291 [Arthrobotrys oligospora ATCC 24927]
AOL_s00169g235	4643	2.63	27.56	3.38944	3.00524e-53	1.6812e-52	Up	NA	NA	NA	NA	gi|345562561|gb|EGX45629.1|//hypothetical protein AOL_s00169g235 [Arthrobotrys oligospora ATCC 24927]
AOL_s00043g74	468	130.38	1365.88	3.38904	0	0	Up	NA	NA	NA	NA	gi|345569419|gb|EGX52285.1|//hypothetical protein AOL_s00043g74 [Arthrobotrys oligospora ATCC 24927]
AOL_s00097g531	993	79.18	828.75	3.38773	0	0	Up	NA	NA	NA	K06948//uncharacterized protein	gi|345563641|gb|EGX46627.1|//hypothetical protein AOL_s00097g531 [Arthrobotrys oligospora ATCC 24927]
AOL_s00054g967	5142	2.35	24.59	3.38734	1.55614e-139	1.8909e-138	Up	NA	NA	NA	K05658//ATP-binding cassette, subfamily B (MDR/TAP), member 1 [EC:3.6.3.44]	gi|345567979|gb|EGX50881.1|//hypothetical protein AOL_s00054g967 [Arthrobotrys oligospora ATCC 24927]
AOL_s00215g310	437	0.82	8.55	3.38223	2.3102e-05	4.07477e-05	Up	GO:0044424//intracellular part	GO:0016763//transferase activity, transferring pentosyl groups;GO:0016757//transferase activity, transferring glycosyl groups	GO:0019359//nicotinamide nucleotide biosynthetic process;GO:0019363//pyridine nucleotide biosynthetic process;GO:0019362//pyridine nucleotide metabolic process;GO:0009165//nucleotide biosynthetic process	K00763//nicotinate phosphoribosyltransferase [EC:6.3.4.21]	gi|345560449|gb|EGX43574.1|//hypothetical protein AOL_s00215g310 [Arthrobotrys oligospora ATCC 24927]
AOL_s00043g456	2992	11.92	124.25	3.38179	1.46585e-165	2.06996e-164	Up	GO:0044424//intracellular part;GO:0005737//cytoplasm	GO:0032559//adenyl ribonucleotide binding;GO:0000166//nucleotide binding;GO:0004812//aminoacyl-tRNA ligase activity;GO:0005488//binding	GO:0006418//tRNA aminoacylation for protein translation	K01893//asparaginyl-tRNA synthetase [EC:6.1.1.22]	gi|345569198|gb|EGX52066.1|//hypothetical protein AOL_s00043g456 [Arthrobotrys oligospora ATCC 24927]
AOL_s00079g473	771	3.3	34.36	3.38019	6.273e-25	2.15975e-24	Up	NA	NA	NA	NA	gi|345565886|gb|EGX48834.1|//hypothetical protein AOL_s00079g473 [Arthrobotrys oligospora ATCC 24927]
AOL_s00097g66	2258	2.49	25.91	3.37929	1.18184e-157	1.59866e-156	Up	NA	NA	NA	K05692//actin beta/gamma 1;K00777;K14855//ribosome assembly protein 4	gi|345564039|gb|EGX47020.1|//hypothetical protein AOL_s00097g66 [Arthrobotrys oligospora ATCC 24927]
AOL_s00110g264	4413	11.17	115.83	3.37431	0	0	Up	NA	NA	NA	K11699//RNA-dependent RNA polymerase [EC:2.7.7.48]	gi|345563096|gb|EGX46100.1|//hypothetical protein AOL_s00110g264 [Arthrobotrys oligospora ATCC 24927]
AOL_s00076g213	769	7.8	80.72	3.37138	1.9708e-56	1.14441e-55	Up	NA	GO:0015036//disulfide oxidoreductase activity	GO:0019725//cellular homeostasis;GO:0018904//ether metabolic process	K03671//thioredoxin 1	gi|345567517|gb|EGX50449.1|//hypothetical protein AOL_s00076g213 [Arthrobotrys oligospora ATCC 24927]
AOL_s00054g751	8058	2.52	26.05	3.36979	2.20866e-213	3.97388e-212	Up	NA	GO:0043167//ion binding;GO:0004133//glycogen debranching enzyme activity	GO:0005977//glycogen metabolic process	K01196//glycogen debranching enzyme [EC:2.4.1.25 3.2.1.33]	gi|345568114|gb|EGX51015.1|//hypothetical protein AOL_s00054g751 [Arthrobotrys oligospora ATCC 24927]
AOL_s00007g122	4332	6.6	68.22	3.36966	5.33022e-144	6.61487e-143	Up	GO:0044464//cell part	GO:0016758//transferase activity, transferring hexosyl groups	GO:0006464//cellular protein modification process	K07151//dolichyl-diphosphooligosaccharide--protein glycosyltransferase [EC:2.4.99.18]	gi|345569961|gb|EGX52786.1|//hypothetical protein AOL_s00007g122 [Arthrobotrys oligospora ATCC 24927]
AOL_s00097g634	1851	0.21	2.17	3.36923	4.72786e-05	8.15239e-05	Up	NA	NA	NA	NA	gi|345563576|gb|EGX46564.1|//hypothetical protein AOL_s00097g634 [Arthrobotrys oligospora ATCC 24927]
AOL_s00079g63	1106	1.83	18.91	3.36923	8.96726e-21	2.82157e-20	Up	NA	NA	NA	NA	gi|345566163|gb|EGX49109.1|//hypothetical protein AOL_s00079g63 [Arthrobotrys oligospora ATCC 24927]
AOL_s00083g331	639	1.18	12.19	3.36884	3.8124e-08	7.84881e-08	Up	NA	NA	NA	NA	gi|345564561|gb|EGX47522.1|//hypothetical protein AOL_s00083g331 [Arthrobotrys oligospora ATCC 24927]
AOL_s00043g152	2125	0.23	2.37	3.36518	1.61884e-06	3.05603e-06	Up	NA	NA	NA	NA	gi|345569497|gb|EGX52363.1|//hypothetical protein AOL_s00043g152 [Arthrobotrys oligospora ATCC 24927]
AOL_s00110g126	4762	5.4	55.63	3.36483	8.01474e-51	4.35046e-50	Up	NA	NA	NA	K14289//exportin-5	gi|345563299|gb|EGX46302.1|//hypothetical protein AOL_s00110g126 [Arthrobotrys oligospora ATCC 24927]
AOL_s00043g436	1317	0.47	4.84	3.36427	4.88148e-09	1.04228e-08	Up	NA	GO:0043169//cation binding;GO:0016787//hydrolase activity;GO:0016813//hydrolase activity, acting on carbon-nitrogen (but not peptide) bonds, in linear amidines	GO:0006595//polyamine metabolic process	K01480//agmatinase [EC:3.5.3.11]	gi|345569178|gb|EGX52046.1|//hypothetical protein AOL_s00043g436 [Arthrobotrys oligospora ATCC 24927]
AOL_s00080g436	1186	0.34	3.5	3.36375	4.72786e-05	8.15692e-05	Up	NA	NA	NA	K14297//nuclear pore complex protein Nup98-Nup96;K01183//chitinase [EC:3.2.1.14]	gi|526205678|gb|EPS45809.1|//hypothetical protein H072_195 [Dactylellina haptotyla CBS 200.50];gi|345565360|gb|EGX48311.1|//hypothetical protein AOL_s00080g436 [Arthrobotrys oligospora ATCC 24927];gi|345560729|gb|EGX43848.1|//hypothetical protein AOL_s00210g295 [Arthrobotrys oligospora ATCC 24927]
AOL_s00210g294	1179	0.42	4.31	3.35923	6.5453e-13	1.62456e-12	Up	NA	NA	NA	K08254//glucan endo-1,3-alpha-glucosidase [EC:3.2.1.59]	gi|345560728|gb|EGX43847.1|//hypothetical protein AOL_s00210g294 [Arthrobotrys oligospora ATCC 24927]
AOL_s00210g339	1899	0.31	3.17	3.35414	4.68664e-07	9.09421e-07	Up	NA	NA	NA	NA	gi|345560773|gb|EGX43892.1|//hypothetical protein AOL_s00210g339 [Arthrobotrys oligospora ATCC 24927]
AOL_s00215g722	567	0.32	3.27	3.35315	4.72786e-05	8.15843e-05	Up	NA	NA	GO:0043170//macromolecule metabolic process;GO:0006355//regulation of transcription, DNA-templated;GO:0044238//primary metabolic process;GO:0006351//transcription, DNA-templated	NA	gi|345559983|gb|EGX43113.1|//hypothetical protein AOL_s00215g722 [Arthrobotrys oligospora ATCC 24927]
AOL_s00004g582	2439	4.86	49.66	3.35306	4.38878e-119	4.58559e-118	Up	NA	GO:0016879//ligase activity, forming carbon-nitrogen bonds	NA	K00102//D-lactate dehydrogenase (cytochrome) [EC:1.1.2.4];K01426//amidase [EC:3.5.1.4];K14026//SEL1 protein	gi|345571108|gb|EGX53923.1|//hypothetical protein AOL_s00004g582 [Arthrobotrys oligospora ATCC 24927]
AOL_s00215g57	3584	4.23	43.21	3.35264	2.69318e-80	2.06588e-79	Up	NA	NA	NA	NA	gi|345560196|gb|EGX43321.1|//hypothetical protein AOL_s00215g57 [Arthrobotrys oligospora ATCC 24927]
AOL_s00215g657	821	0.95	9.7	3.35199	8.96562e-12	2.14036e-11	Up	NA	NA	NA	NA	gi|345560072|gb|EGX43201.1|//hypothetical protein AOL_s00215g657 [Arthrobotrys oligospora ATCC 24927]
AOL_s00078g395	1967	0.34	3.47	3.35133	6.15482e-10	1.36904e-09	Up	NA	NA	NA	K15110//solute carrier family 25 (mitochondrial 2-oxodicarboxylate transporter), member 21;K10380//ankyrin;K01279//tripeptidyl-peptidase I [EC:3.4.14.9];K16261//yeast amino acid transporter;K02155//V-type H+-transporting ATPase 16kDa proteolipid subunit;K00777	gi|345566419|gb|EGX49362.1|//hypothetical protein AOL_s00078g395 [Arthrobotrys oligospora ATCC 24927]
AOL_s00043g282	1809	0.2	2.04	3.3505	4.72786e-05	8.15994e-05	Up	NA	NA	NA	K19691//osomolarity two-component system, sensor histidine kinase NIK1 [EC:2.7.13.3];K11231//osomolarity two-component system, sensor histidine kinase SLN1 [EC:2.7.13.3];K19692//osomolarity two-component system, sensor histidine kinase TcsA [EC:2.7.13.3]	gi|345569627|gb|EGX52493.1|//hypothetical protein AOL_s00043g282 [Arthrobotrys oligospora ATCC 24927]
AOL_s00006g285	2057	3.58	36.44	3.34749	2.0316e-60	1.24161e-59	Up	NA	NA	NA	NA	gi|345570598|gb|EGX53419.1|//hypothetical protein AOL_s00006g285 [Arthrobotrys oligospora ATCC 24927]
AOL_s00043g102	762	1.67	16.99	3.34677	1.05961e-12	2.60982e-12	Up	GO:0005819//spindle	NA	GO:0048522//positive regulation of cellular process;GO:0031110//regulation of microtubule polymerization or depolymerization;GO:0008608//attachment of spindle microtubules to kinetochore	K11569//DASH complex subunit DAD4	gi|345569447|gb|EGX52313.1|//hypothetical protein AOL_s00043g102 [Arthrobotrys oligospora ATCC 24927]
AOL_s00043g624	4094	2.76	28.05	3.34526	2.5131e-53	1.40758e-52	Up	GO:0043231//intracellular membrane-bounded organelle	GO:0003677//DNA binding;GO:0001071//nucleic acid binding transcription factor activity	GO:0006351//transcription, DNA-templated	K19383//homeobox protein TGIF1	gi|345569021|gb|EGX51890.1|//hypothetical protein AOL_s00043g624 [Arthrobotrys oligospora ATCC 24927]
AOL_s00079g70	5216	0.85	8.63	3.34383	3.04668e-22	9.93181e-22	Up	NA	NA	NA	NA	gi|345566170|gb|EGX49116.1|//hypothetical protein AOL_s00079g70 [Arthrobotrys oligospora ATCC 24927]
AOL_s00176g66	2172	1.92	19.47	3.34207	2.53118e-77	1.87674e-76	Up	NA	NA	NA	NA	gi|345561820|gb|EGX44895.1|//hypothetical protein AOL_s00176g66 [Arthrobotrys oligospora ATCC 24927]
AOL_s00007g218	459	21.26	213.98	3.33126	3.98984e-76	2.92108e-75	Up	GO:0031224//intrinsic component of membrane	NA	NA	NA	gi|526204932|gb|EPS45103.1|//hypothetical protein H072_917 [Dactylellina haptotyla CBS 200.50];gi|345570057|gb|EGX52882.1|//hypothetical protein AOL_s00007g218 [Arthrobotrys oligospora ATCC 24927]
AOL_s00083g489	5583	14.45	145.04	3.32731	0	0	Up	GO:0016020//membrane;GO:0031224//intrinsic component of membrane;GO:0016021//integral component of membrane;GO:0019866//organelle inner membrane	GO:0003735//structural constituent of ribosome	GO:0006810//transport;GO:0055085//transmembrane transport;GO:0006412//translation	K15109//solute carrier family 25 (mitochondrial carnitine/acylcarnitine transporter), member 20/29	gi|345564433|gb|EGX47396.1|//hypothetical protein AOL_s00083g489 [Arthrobotrys oligospora ATCC 24927]
AOL_s00043g649	12311	7.88	78.71	3.32028	2.84518e-170	4.14329e-169	Up	NA	NA	NA	K01923//phosphoribosylaminoimidazole-succinocarboxamide synthase [EC:6.3.2.6]	gi|345569046|gb|EGX51915.1|//hypothetical protein AOL_s00043g649 [Arthrobotrys oligospora ATCC 24927];gi|526200740|gb|EPS41360.1|//hypothetical protein H072_4753 [Dactylellina haptotyla CBS 200.50]
AOL_s00210g302	2151	0.49	4.89	3.31898	5.1926e-13	1.29364e-12	Up	NA	GO:0005488//binding	NA	K15110//solute carrier family 25 (mitochondrial 2-oxodicarboxylate transporter), member 21;K02155//V-type H+-transporting ATPase 16kDa proteolipid subunit;K00777	gi|345560736|gb|EGX43855.1|//hypothetical protein AOL_s00210g302 [Arthrobotrys oligospora ATCC 24927]
AOL_s00078g85	7397	5.66	56.3	3.31426	8.75408e-59	5.22665e-58	Up	GO:0043231//intracellular membrane-bounded organelle	GO:0046914//transition metal ion binding;GO:0001071//nucleic acid binding transcription factor activity;GO:0003676//nucleic acid binding	GO:0006351//transcription, DNA-templated	K06126//ubiquinone biosynthesis monooxygenase Coq6 [EC:1.14.13.-];K09241//transcriptional regulatory protein GAL4;K03457//nucleobase:cation symporter-1, NCS1 family;K01427//urease [EC:3.5.1.5]	gi|526199789|gb|EPS40572.1|//hypothetical protein H072_5541 [Dactylellina haptotyla CBS 200.50];gi|345566654|gb|EGX49596.1|//hypothetical protein AOL_s00078g85 [Arthrobotrys oligospora ATCC 24927]
AOL_s00007g502	1358	4.38	43.51	3.31234	2.72748e-56	1.57889e-55	Up	GO:0016020//membrane	NA	NA	NA	gi|345569893|gb|EGX52719.1|//hypothetical protein AOL_s00007g502 [Arthrobotrys oligospora ATCC 24927]
AOL_s00054g240	3400	1.87	18.56	3.31109	2.151e-77	1.59612e-76	Up	NA	NA	NA	K11699//RNA-dependent RNA polymerase [EC:2.7.7.48]	gi|345568648|gb|EGX51541.1|//hypothetical protein AOL_s00054g240 [Arthrobotrys oligospora ATCC 24927]
AOL_s00188g260	1825	0.96	9.47	3.30226	9.31024e-18	2.68975e-17	Up	NA	NA	NA	K15385//aspyridone synthetase trans-acting enoyl reductase;K00344//NADPH2:quinone reductase [EC:1.6.5.5];K11293//protein HIRA/HIR1	gi|345561503|gb|EGX44592.1|//hypothetical protein AOL_s00188g260 [Arthrobotrys oligospora ATCC 24927]
AOL_s00081g335	1126	7.28	71.66	3.29916	4.63406e-75	3.35062e-74	Up	NA	GO:0016769//transferase activity, transferring nitrogenous groups;GO:0048037//cofactor binding	GO:0009064//glutamine family amino acid metabolic process	K00818//acetylornithine aminotransferase [EC:2.6.1.11]	gi|345565052|gb|EGX48008.1|//hypothetical protein AOL_s00081g335 [Arthrobotrys oligospora ATCC 24927]
AOL_s00075g94	3886	1.07	10.52	3.29745	2.30304e-41	1.07537e-40	Up	NA	NA	NA	K12183//ESCRT-I complex subunit TSG101	gi|345567740|gb|EGX50668.1|//hypothetical protein AOL_s00075g94 [Arthrobotrys oligospora ATCC 24927]
AOL_s00083g361	4034	15.48	152.01	3.29569	1.57202e-227	3.06511e-226	Up	NA	NA	NA	K01749//hydroxymethylbilane synthase [EC:2.5.1.61]	gi|345564463|gb|EGX47425.1|//hypothetical protein AOL_s00083g361 [Arthrobotrys oligospora ATCC 24927]
AOL_s00080g97	3321	5.12	50.11	3.29088	9.427e-109	9.0952e-108	Up	GO:0016020//membrane;GO:0044464//cell part	GO:0015932//nucleobase-containing compound transmembrane transporter activity	GO:0006810//transport;GO:0015931//nucleobase-containing compound transport	K13953//alcohol dehydrogenase, propanol-preferring [EC:1.1.1.1];K03457//nucleobase:cation symporter-1, NCS1 family	gi|345565519|gb|EGX48468.1|//hypothetical protein AOL_s00080g97 [Arthrobotrys oligospora ATCC 24927]
AOL_s00215g194	6193	9.89	96.71	3.28962	0	0	Up	NA	NA	NA	K01464//dihydropyrimidinase [EC:3.5.2.2];K10389//tubulin gamma;K15303//aflatoxin B1 aldehyde reductase	gi|345560333|gb|EGX43458.1|//hypothetical protein AOL_s00215g194 [Arthrobotrys oligospora ATCC 24927]
AOL_s00109g68	1191	8	78.19	3.28891	1.9497e-86	1.58562e-85	Up	NA	NA	NA	K13535//cardiolipin-specific phospholipase [EC:3.1.1.-]	gi|345563496|gb|EGX46496.1|//hypothetical protein AOL_s00109g68 [Arthrobotrys oligospora ATCC 24927]
AOL_s00088g53	822	12.56	122.46	3.2854	3.12566e-89	2.59868e-88	Up	NA	NA	NA	NA	gi|345564370|gb|EGX47338.1|//hypothetical protein AOL_s00088g53 [Arthrobotrys oligospora ATCC 24927]
AOL_s00083g391	1721	1.15	11.2	3.28379	2.1503e-24	7.32485e-24	Up	NA	NA	NA	K18932//palmitoyltransferase [EC:2.3.1.225]	gi|345564493|gb|EGX47455.1|//hypothetical protein AOL_s00083g391 [Arthrobotrys oligospora ATCC 24927]
AOL_s00007g162	3926	0.19	1.85	3.28345	3.11376e-08	6.42752e-08	Up	NA	NA	NA	K16261//yeast amino acid transporter;K00777	gi|345570001|gb|EGX52826.1|//hypothetical protein AOL_s00007g162 [Arthrobotrys oligospora ATCC 24927]
AOL_s00078g151	3421	0.91	8.85	3.28174	6.90452e-29	2.58538e-28	Up	NA	GO:0016787//hydrolase activity;GO:0005488//binding	GO:0006259//DNA metabolic process	K14635//ATP-dependent DNA helicase MPH1 [EC:3.6.4.12]	gi|345566720|gb|EGX49662.1|//hypothetical protein AOL_s00078g151 [Arthrobotrys oligospora ATCC 24927]
AOL_s00076g35	1220	4.65	45.21	3.28134	4.94996e-53	2.76084e-52	Up	GO:0044424//intracellular part;GO:0005737//cytoplasm	GO:0004615//phosphomannomutase activity;GO:0016868//intramolecular transferase activity, phosphotransferases	GO:0006013//mannose metabolic process;GO:0009298//GDP-mannose biosynthetic process	K17497//phosphomannomutase [EC:5.4.2.8]	gi|345567339|gb|EGX50271.1|//hypothetical protein AOL_s00076g35 [Arthrobotrys oligospora ATCC 24927]
AOL_s00054g817	1914	2.01	19.54	3.28116	2.09402e-47	1.08424e-46	Up	NA	NA	NA	K00777	gi|345567829|gb|EGX50731.1|//hypothetical protein AOL_s00054g817 [Arthrobotrys oligospora ATCC 24927]
AOL_s00083g233	5064	0.49	4.75	3.27707	4.63148e-21	1.47171e-20	Up	NA	NA	NA	K02365//separase [EC:3.4.22.49]	gi|345564765|gb|EGX47725.1|//hypothetical protein AOL_s00083g233 [Arthrobotrys oligospora ATCC 24927]
AOL_s00076g192	954	5.82	56.39	3.27635	3.60742e-49	1.91247e-48	Up	NA	NA	NA	NA	gi|345567496|gb|EGX50428.1|//hypothetical protein AOL_s00076g192 [Arthrobotrys oligospora ATCC 24927]
AOL_s00004g341	4037	0.59	5.71	3.2747	7.04794e-17	1.97852e-16	Up	NA	NA	NA	NA	gi|345571494|gb|EGX54308.1|//hypothetical protein AOL_s00004g341 [Arthrobotrys oligospora ATCC 24927]
AOL_s00006g172	1614	5.25	50.44	3.26418	4.05212e-70	2.78303e-69	Up	GO:0031224//intrinsic component of membrane;GO:0016021//integral component of membrane;GO:0005743//mitochondrial inner membrane;GO:0019866//organelle inner membrane	GO:0005215//transporter activity	GO:0006810//transport;GO:0055085//transmembrane transport	K15110//solute carrier family 25 (mitochondrial 2-oxodicarboxylate transporter), member 21	gi|345570485|gb|EGX53306.1|//hypothetical protein AOL_s00006g172 [Arthrobotrys oligospora ATCC 24927]
AOL_s00140g45	2300	1.25	11.98	3.26063	1.66315e-24	5.67995e-24	Up	NA	NA	NA	NA	gi|345562693|gb|EGX45729.1|//hypothetical protein AOL_s00140g45 [Arthrobotrys oligospora ATCC 24927]
AOL_s00007g75	4399	0.6	5.75	3.26053	7.41886e-10	1.6455e-09	Up	NA	NA	NA	NA	gi|345570302|gb|EGX53126.1|//hypothetical protein AOL_s00007g75 [Arthrobotrys oligospora ATCC 24927]
AOL_s00109g131	2916	3.41	32.54	3.25437	1.21557e-82	9.47247e-82	Up	NA	NA	NA	NA	gi|345563372|gb|EGX46373.1|//hypothetical protein AOL_s00109g131 [Arthrobotrys oligospora ATCC 24927]
AOL_s00004g254	2150	8.77	83.22	3.24628	1.36168e-146	1.729e-145	Up	NA	GO:0016620//oxidoreductase activity, acting on the aldehyde or oxo group of donors, NAD or NADP as acceptor;GO:0003824//catalytic activity	GO:0008152//metabolic process;GO:0055114//oxidation-reduction process	K00129//aldehyde dehydrogenase (NAD(P)+) [EC:1.2.1.5];K00128//aldehyde dehydrogenase (NAD+) [EC:1.2.1.3]	gi|345571407|gb|EGX54221.1|//hypothetical protein AOL_s00004g254 [Arthrobotrys oligospora ATCC 24927]
AOL_s00169g28	1974	8.35	79.16	3.24492	2.53034e-125	2.79086e-124	Up	NA	NA	NA	NA	gi|345562354|gb|EGX45422.1|//hypothetical protein AOL_s00169g28 [Arthrobotrys oligospora ATCC 24927]
AOL_s00097g172	1819	0.21	1.99	3.24431	0.000163951	0.000272861	Up	NA	NA	NA	NA	gi|345564145|gb|EGX47126.1|//hypothetical protein AOL_s00097g172 [Arthrobotrys oligospora ATCC 24927]
AOL_s00173g263	2008	6.96	65.9	3.24312	1.20425e-49	6.41716e-49	Up	NA	NA	NA	K01426//amidase [EC:3.5.1.4];K11244//cell wall integrity and stress response component	gi|345562090|gb|EGX45162.1|//hypothetical protein AOL_s00173g263 [Arthrobotrys oligospora ATCC 24927]
AOL_s00076g171	3926	3.55	33.54	3.23999	3.45488e-126	3.83784e-125	Up	NA	GO:0004175//endopeptidase activity;GO:0070011//peptidase activity, acting on L-amino acid peptides;GO:0046872//metal ion binding;GO:0008233//peptidase activity;GO:0000166//nucleotide binding;GO:0046914//transition metal ion binding;GO:0003824//catalytic activity;GO:0005488//binding	GO:0019538//protein metabolic process;GO:0044238//primary metabolic process;GO:0044237//cellular metabolic process	K06972//uncharacterized protein	gi|345567475|gb|EGX50407.1|//hypothetical protein AOL_s00076g171 [Arthrobotrys oligospora ATCC 24927]
AOL_s00215g384	735	1.34	12.66	3.23997	2.1396e-10	4.84595e-10	Up	NA	GO:0008238//exopeptidase activity;GO:0008233//peptidase activity;GO:0016787//hydrolase activity	GO:0019538//protein metabolic process	K01301//N-acetylated-alpha-linked acidic dipeptidase [EC:3.4.17.21]	gi|345560523|gb|EGX43648.1|//hypothetical protein AOL_s00215g384 [Arthrobotrys oligospora ATCC 24927]
AOL_s00081g140	2972	5.43	51.27	3.23909	6.7533e-146	8.52856e-145	Up	NA	NA	NA	K10858//DNA mismatch repair protein PMS2	gi|526197911|gb|EPS39117.1|//hypothetical protein H072_7122 [Dactylellina haptotyla CBS 200.50];gi|345565130|gb|EGX48084.1|//hypothetical protein AOL_s00081g140 [Arthrobotrys oligospora ATCC 24927]
AOL_s00173g143	2990	2.23	21.02	3.23665	1.59405e-30	6.11883e-30	Up	NA	GO:0016787//hydrolase activity	NA	K16261//yeast amino acid transporter;K05991//endoglycosylceramidase [EC:3.2.1.123]	gi|345561970|gb|EGX45042.1|//hypothetical protein AOL_s00173g143 [Arthrobotrys oligospora ATCC 24927]
AOL_s00043g328	1795	1.03	9.7	3.23534	4.01544e-20	1.23838e-19	Up	NA	NA	NA	NA	gi|345569318|gb|EGX52185.1|//hypothetical protein AOL_s00043g328 [Arthrobotrys oligospora ATCC 24927]
AOL_s00097g423	996	0.31	2.9	3.22571	0.000163951	0.000272813	Up	NA	NA	NA	NA	gi|345563809|gb|EGX46793.1|//hypothetical protein AOL_s00097g423 [Arthrobotrys oligospora ATCC 24927]
AOL_s00054g163	3332	1.92	17.96	3.22561	8.28856e-30	3.1479e-29	Up	NA	NA	NA	K04508//transducin (beta)-like 1;K02216//serine/threonine-protein kinase Chk1 [EC:2.7.11.1]	gi|345568571|gb|EGX51464.1|//hypothetical protein AOL_s00054g163 [Arthrobotrys oligospora ATCC 24927]
AOL_s00076g473	2605	1.08	10.1	3.22525	1.2224e-27	4.47476e-27	Up	NA	NA	NA	K15710//E3 ubiquitin-protein ligase SHPRH [EC:3.6.4.- 2.3.2.27]	gi|345567050|gb|EGX49987.1|//hypothetical protein AOL_s00076g473 [Arthrobotrys oligospora ATCC 24927]
AOL_s00079g295	4751	11.07	103.1	3.21932	9.47704e-224	1.82115e-222	Up	NA	GO:0008483//transaminase activity;GO:0048037//cofactor binding	GO:0006520//cellular amino acid metabolic process	K13524//4-aminobutyrate aminotransferase / (S)-3-amino-2-methylpropionate transaminase [EC:2.6.1.19 2.6.1.22];K01814//phosphoribosylformimino-5-aminoimidazole carboxamide ribotide isomerase [EC:5.3.1.16]	gi|345566127|gb|EGX49074.1|//hypothetical protein AOL_s00079g295 [Arthrobotrys oligospora ATCC 24927];gi|345566128|gb|EGX49075.1|//hypothetical protein AOL_s00079g296 [Arthrobotrys oligospora ATCC 24927]
AOL_s00081g181	1842	5.75	53.53	3.21871	1.27317e-69	8.67395e-69	Up	NA	NA	NA	NA	gi|345565122|gb|EGX48077.1|//hypothetical protein AOL_s00081g181 [Arthrobotrys oligospora ATCC 24927]
AOL_s00173g171	2536	1.15	10.7	3.21791	1.13735e-16	3.17274e-16	Up	NA	NA	NA	K01183//chitinase [EC:3.2.1.14]	gi|345561998|gb|EGX45070.1|//hypothetical protein AOL_s00173g171 [Arthrobotrys oligospora ATCC 24927]
AOL_s00081g97	1312	0.3	2.79	3.21723	0.00040571	0.000656461	Up	NA	NA	NA	K19219//jumonji domain-containing protein 7	gi|345565148|gb|EGX48101.1|//hypothetical protein AOL_s00081g97 [Arthrobotrys oligospora ATCC 24927]
AOL_s00097g432	1182	0.34	3.16	3.21632	0.000163951	0.00027291	Up	NA	NA	NA	K15462//protein ATS1	gi|345563818|gb|EGX46802.1|//hypothetical protein AOL_s00097g432 [Arthrobotrys oligospora ATCC 24927]
AOL_s00210g298	6453	1.53	14.19	3.21327	2.77818e-89	2.31391e-88	Up	NA	NA	NA	K00517;K16261//yeast amino acid transporter	gi|345560732|gb|EGX43851.1|//hypothetical protein AOL_s00210g298 [Arthrobotrys oligospora ATCC 24927]
AOL_s00076g397	2477	6.56	60.8	3.2123	2.60074e-236	5.26933e-235	Up	NA	NA	NA	NA	gi|345567110|gb|EGX50046.1|//hypothetical protein AOL_s00076g397 [Arthrobotrys oligospora ATCC 24927]
AOL_s00079g302	2012	4.94	45.68	3.20898	6.11296e-79	4.61692e-78	Up	NA	NA	NA	K14663//protein N-terminal amidase [EC:3.5.1.-]	gi|345565715|gb|EGX48663.1|//hypothetical protein AOL_s00079g302 [Arthrobotrys oligospora ATCC 24927]
AOL_s00075g147	2192	11.01	101.77	3.20843	4.45422e-194	7.45302e-193	Up	NA	NA	NA	K15110//solute carrier family 25 (mitochondrial 2-oxodicarboxylate transporter), member 21;K01279//tripeptidyl-peptidase I [EC:3.4.14.9];K06694//26S proteasome non-ATPase regulatory subunit 10;K02155//V-type H+-transporting ATPase 16kDa proteolipid subunit;K16261//yeast amino acid transporter;K00777;K08803//death-associated protein kinase [EC:2.7.11.1]	gi|345567793|gb|EGX50721.1|//hypothetical protein AOL_s00075g147 [Arthrobotrys oligospora ATCC 24927]
AOL_s00043g416	3810	2.03	18.76	3.20811	7.9143e-38	3.49083e-37	Up	NA	GO:0097159//organic cyclic compound binding;GO:1901363//heterocyclic compound binding;GO:0032559//adenyl ribonucleotide binding;GO:0000166//nucleotide binding;GO:0003909//DNA ligase activity;GO:0003676//nucleic acid binding;GO:0016874//ligase activity	GO:0033554//cellular response to stress;GO:0006266//DNA ligation;GO:0006974//cellular response to DNA damage stimulus;GO:0006259//DNA metabolic process	K10747//DNA ligase 1 [EC:6.5.1.1 6.5.1.6 6.5.1.7]	gi|345569158|gb|EGX52026.1|//hypothetical protein AOL_s00043g416 [Arthrobotrys oligospora ATCC 24927]
AOL_s00140g33	1238	3.4	31.41	3.20762	1.08047e-37	4.75e-37	Up	NA	NA	NA	K04126//isopenicillin-N synthase [EC:1.21.3.1];K00540;K04125//gibberellin 2-oxidase [EC:1.14.11.13];K01069//hydroxyacylglutathione hydrolase [EC:3.1.2.6]	gi|345562681|gb|EGX45717.1|//hypothetical protein AOL_s00140g33 [Arthrobotrys oligospora ATCC 24927]
AOL_s00109g57	2736	0.7	6.46	3.20611	5.81362e-10	1.29531e-09	Up	NA	NA	NA	K19475//WAS/WASL-interacting protein;K05747//Wiskott-Aldrich syndrome protein	gi|345563485|gb|EGX46485.1|//hypothetical protein AOL_s00109g57 [Arthrobotrys oligospora ATCC 24927]
AOL_s00188g246	1958	0.57	5.26	3.20603	8.3267e-10	1.8416e-09	Up	NA	NA	NA	NA	gi|345561489|gb|EGX44578.1|//hypothetical protein AOL_s00188g246 [Arthrobotrys oligospora ATCC 24927]
AOL_s00006g261	3295	0.45	4.15	3.20511	7.69736e-11	1.77529e-10	Up	NA	NA	NA	K06694//26S proteasome non-ATPase regulatory subunit 10	gi|345570574|gb|EGX53395.1|//hypothetical protein AOL_s00006g261 [Arthrobotrys oligospora ATCC 24927]
AOL_s00210g393	1456	0.41	3.78	3.20469	2.99584e-06	5.57088e-06	Up	NA	NA	NA	NA	gi|345560827|gb|EGX43946.1|//hypothetical protein AOL_s00210g393 [Arthrobotrys oligospora ATCC 24927]
AOL_s00076g506	1200	1.67	15.38	3.20314	7.56204e-18	2.18741e-17	Up	NA	NA	NA	NA	gi|345566927|gb|EGX49865.1|//hypothetical protein AOL_s00076g506 [Arthrobotrys oligospora ATCC 24927]
AOL_s00004g298	576	10.11	93.09	3.20284	2.46726e-44	1.21602e-43	Up	NA	NA	NA	NA	gi|345571451|gb|EGX54265.1|//hypothetical protein AOL_s00004g298 [Arthrobotrys oligospora ATCC 24927]
AOL_s00097g49	891	5.79	53.29	3.20223	2.957e-32	1.17523e-31	Up	NA	NA	NA	K12175//COP9 signalosome complex subunit 1	gi|345564022|gb|EGX47003.1|//hypothetical protein AOL_s00097g49 [Arthrobotrys oligospora ATCC 24927]
AOL_s00080g140	1526	2.71	24.92	3.20094	5.41378e-36	2.32197e-35	Up	NA	NA	NA	NA	gi|345565562|gb|EGX48511.1|//hypothetical protein AOL_s00080g140 [Arthrobotrys oligospora ATCC 24927]
AOL_s00043g742	1234	0.36	3.31	3.20076	1.34382e-05	2.40853e-05	Up	NA	NA	NA	NA	gi|345568853|gb|EGX51723.1|//hypothetical protein AOL_s00043g742 [Arthrobotrys oligospora ATCC 24927]
AOL_s00043g688	1558	0.52	4.77	3.19741	1.0161e-12	2.50465e-12	Up	NA	NA	GO:0044238//primary metabolic process	K01052//lysosomal acid lipase/cholesteryl ester hydrolase [EC:3.1.1.13];K03848//alpha-1,3-glucosyltransferase [EC:2.4.1.267]	gi|345569085|gb|EGX51954.1|//hypothetical protein AOL_s00043g688 [Arthrobotrys oligospora ATCC 24927]
AOL_s00075g104	704	0.31	2.82	3.18536	1.50472e-05	2.68556e-05	Up	NA	NA	NA	K09527//DnaJ homolog subfamily C member 7	gi|345567750|gb|EGX50678.1|//hypothetical protein AOL_s00075g104 [Arthrobotrys oligospora ATCC 24927]
AOL_s00004g342	4013	0.98	8.9	3.18295	7.12596e-25	2.44889e-24	Up	NA	GO:0046914//transition metal ion binding	GO:0044710//single-organism metabolic process	K10534//nitrate reductase (NAD(P)H) [EC:1.7.1.1 1.7.1.2 1.7.1.3]	gi|345571495|gb|EGX54309.1|//hypothetical protein AOL_s00004g342 [Arthrobotrys oligospora ATCC 24927]
AOL_s00083g275	2874	1.36	12.35	3.18283	2.957e-32	1.17473e-31	Up	GO:0043231//intracellular membrane-bounded organelle	GO:0046914//transition metal ion binding;GO:0001071//nucleic acid binding transcription factor activity	GO:0006351//transcription, DNA-templated	K10733//GINS complex subunit 2;K09246//arginine metabolism regulation protein II;K09245//transcriptional activator protein UGA3	gi|345564807|gb|EGX47767.1|//hypothetical protein AOL_s00083g275 [Arthrobotrys oligospora ATCC 24927]
AOL_s00043g703	350	4.4	39.86	3.17937	1.70148e-11	4.02277e-11	Up	GO:0031224//intrinsic component of membrane;GO:0043231//intracellular membrane-bounded organelle;GO:0043234//protein complex	GO:0030234//enzyme regulator activity;GO:0022857//transmembrane transporter activity;GO:0003676//nucleic acid binding	GO:0006810//transport;GO:0006260//DNA replication	K04802//proliferating cell nuclear antigen	gi|345569100|gb|EGX51969.1|//hypothetical protein AOL_s00043g703 [Arthrobotrys oligospora ATCC 24927]
AOL_s00110g334	585	0.88	7.97	3.179	1.33364e-18	3.93588e-18	Up	NA	NA	NA	NA	gi|345563166|gb|EGX46170.1|//hypothetical protein AOL_s00110g334 [Arthrobotrys oligospora ATCC 24927]
AOL_s00078g277	1469	3.22	29.15	3.17836	5.99556e-40	2.73781e-39	Up	NA	NA	NA	K06910//uncharacterized protein	gi|345566301|gb|EGX49244.1|//hypothetical protein AOL_s00078g277 [Arthrobotrys oligospora ATCC 24927]
AOL_s00043g604	3723	2.24	20.25	3.17635	7.13822e-74	5.10186e-73	Up	NA	NA	NA	K10405//kinesin family member C1	gi|345569001|gb|EGX51870.1|//hypothetical protein AOL_s00043g604 [Arthrobotrys oligospora ATCC 24927]
AOL_s00076g411	3068	0.53	4.79	3.17596	1.5287e-15	4.12253e-15	Up	NA	GO:0016832//aldehyde-lyase activity;GO:0003824//catalytic activity;GO:0016830//carbon-carbon lyase activity	GO:0008152//metabolic process;GO:0044238//primary metabolic process	K01621//xylulose-5-phosphate/fructose-6-phosphate phosphoketolase [EC:4.1.2.9 4.1.2.22]	gi|345567124|gb|EGX50060.1|//hypothetical protein AOL_s00076g411 [Arthrobotrys oligospora ATCC 24927]
AOL_s00140g94	1628	0.48	4.33	3.17326	1.93588e-11	4.57001e-11	Up	NA	NA	NA	NA	gi|345562742|gb|EGX45778.1|//hypothetical protein AOL_s00140g94 [Arthrobotrys oligospora ATCC 24927]
AOL_s00117g58	816	0.59	5.32	3.17264	0.000201494	0.000332494	Up	NA	NA	NA	NA	gi|345562840|gb|EGX45853.1|//hypothetical protein AOL_s00117g58 [Arthrobotrys oligospora ATCC 24927]
AOL_s00004g610	2610	7.84	70.52	3.16911	1.66143e-108	1.60129e-107	Up	GO:0016020//membrane	GO:0015103//inorganic anion transmembrane transporter activity	GO:0015698//inorganic anion transport;GO:0071705//nitrogen compound transport	K02575//MFS transporter, NNP family, nitrate/nitrite transporter	gi|345571136|gb|EGX53951.1|//hypothetical protein AOL_s00004g610 [Arthrobotrys oligospora ATCC 24927]
AOL_s00110g37	7441	2.43	21.8	3.1653	7.41266e-156	9.95475e-155	Up	NA	NA	NA	K15304//Ran-binding protein 3	gi|345563210|gb|EGX46213.1|//hypothetical protein AOL_s00110g37 [Arthrobotrys oligospora ATCC 24927]
AOL_s00054g548	1681	1.02	9.14	3.16363	1.07044e-13	2.72731e-13	Up	NA	NA	NA	NA	gi|345568275|gb|EGX51172.1|//hypothetical protein AOL_s00054g548 [Arthrobotrys oligospora ATCC 24927]
AOL_s00117g54	2267	5.69	50.85	3.15975	2.20834e-147	2.81556e-146	Up	NA	NA	NA	NA	gi|345562836|gb|EGX45849.1|//hypothetical protein AOL_s00117g54 [Arthrobotrys oligospora ATCC 24927]
AOL_s00083g146	1435	1.51	13.49	3.15927	4.22584e-14	1.08768e-13	Up	NA	GO:0016407//acetyltransferase activity	NA	K17972//N-terminal acetyltransferase B complex catalytic subunit [EC:2.3.1.88]	gi|345564678|gb|EGX47638.1|//hypothetical protein AOL_s00083g146 [Arthrobotrys oligospora ATCC 24927]
AOL_s00076g556	1609	2.67	23.8	3.15605	4.07494e-29	1.53324e-28	Up	GO:0005829//cytosol	GO:0016799//hydrolase activity, hydrolyzing N-glycosyl compounds	GO:0009691//cytokinin biosynthetic process	K06966//uncharacterized protein	gi|345566977|gb|EGX49915.1|//hypothetical protein AOL_s00076g556 [Arthrobotrys oligospora ATCC 24927]
AOL_s00078g26	5763	3.73	33.1	3.14958	4.10662e-227	7.99033e-226	Up	NA	NA	NA	K06679//mitotic spindle assembly checkpoint protein MAD1;K00511//squalene monooxygenase [EC:1.14.13.132]	gi|345566595|gb|EGX49537.1|//hypothetical protein AOL_s00078g26 [Arthrobotrys oligospora ATCC 24927];gi|345566596|gb|EGX49538.1|//hypothetical protein AOL_s00078g27 [Arthrobotrys oligospora ATCC 24927]
AOL_s00080g418	3319	12.22	108.44	3.14958	4.22228e-193	6.98964e-192	Up	NA	NA	NA	K12488//Arf-GAP with SH3 domain, ANK repeat and PH domain-containing protein	gi|345565342|gb|EGX48293.1|//hypothetical protein AOL_s00080g418 [Arthrobotrys oligospora ATCC 24927]
AOL_s00193g117	982	2.13	18.89	3.1487	2.5406e-17	7.23004e-17	Up	NA	NA	NA	K01046//triacylglycerol lipase [EC:3.1.1.3];K17648//versiconal hemiacetal acetate esterase [EC:3.1.1.94]	gi|345561293|gb|EGX44389.1|//hypothetical protein AOL_s00193g117 [Arthrobotrys oligospora ATCC 24927]
AOL_s00110g164	3126	2.62	23.21	3.14711	6.77388e-47	3.48606e-46	Up	NA	NA	NA	K01199//glucan endo-1,3-beta-D-glucosidase [EC:3.2.1.39];K13115//coiled-coil domain-containing protein 130	gi|345563337|gb|EGX46340.1|//hypothetical protein AOL_s00110g164 [Arthrobotrys oligospora ATCC 24927]
AOL_s00004g202	1729	1.12	9.92	3.14684	2.2412e-18	6.56648e-18	Up	NA	NA	NA	NA	gi|345571355|gb|EGX54169.1|//hypothetical protein AOL_s00004g202 [Arthrobotrys oligospora ATCC 24927]
AOL_s00076g145	1465	10.14	89.7	3.14505	2.3286e-116	2.39278e-115	Up	GO:0031224//intrinsic component of membrane;GO:0016020//membrane	GO:0016787//hydrolase activity;GO:0032559//adenyl ribonucleotide binding;GO:0000166//nucleotide binding;GO:0008556//potassium-transporting ATPase activity	GO:0006810//transport;GO:0009206//purine ribonucleoside triphosphate biosynthetic process;GO:0006811//ion transport	K01541//H+/K+-exchanging ATPase [EC:3.6.3.10];K01539//sodium/potassium-transporting ATPase subunit alpha [EC:3.6.3.9]	gi|345567449|gb|EGX50381.1|//hypothetical protein AOL_s00076g145 [Arthrobotrys oligospora ATCC 24927]
AOL_s00215g279	1903	33.05	291.89	3.1427	0	0	Up	NA	GO:0003824//catalytic activity	NA	K00107//D-arabinono-1,4-lactone oxidase [EC:1.1.3.37];K00540;K01501//nitrilase [EC:3.5.5.1];K04487//cysteine desulfurase [EC:2.8.1.7]	gi|345560418|gb|EGX43543.1|//hypothetical protein AOL_s00215g279 [Arthrobotrys oligospora ATCC 24927]
AOL_s00097g614	407	4.08	36.01	3.14176	3.6337e-12	8.81012e-12	Up	NA	GO:0004559//alpha-mannosidase activity	GO:0005975//carbohydrate metabolic process	K01969//3-methylcrotonyl-CoA carboxylase beta subunit [EC:6.4.1.4];K08257//mannan endo-1,6-alpha-mannosidase [EC:3.2.1.101]	gi|345563611|gb|EGX46598.1|//hypothetical protein AOL_s00097g614 [Arthrobotrys oligospora ATCC 24927]
AOL_s00109g107	2734	1.78	15.7	3.14082	1.21428e-35	5.16526e-35	Up	NA	NA	NA	K17623//pseudouridine-5'-monophosphatase [EC:3.1.3.-]	gi|345563535|gb|EGX46535.1|//hypothetical protein AOL_s00109g107 [Arthrobotrys oligospora ATCC 24927]
AOL_s00176g40	861	0.86	7.58	3.13979	8.34464e-18	2.41228e-17	Up	NA	NA	NA	NA	gi|345561794|gb|EGX44869.1|//hypothetical protein AOL_s00176g40 [Arthrobotrys oligospora ATCC 24927]
AOL_s00079g67	4277	1.01	8.88	3.1362	4.67422e-32	1.84827e-31	Up	GO:0031224//intrinsic component of membrane	GO:0016614//oxidoreductase activity, acting on CH-OH group of donors;GO:0004457//lactate dehydrogenase activity;GO:0060089//molecular transducer activity;GO:0050660//flavin adenine dinucleotide binding;GO:0003824//catalytic activity;GO:0050662//coenzyme binding	GO:0008152//metabolic process;GO:0023052//signaling;GO:0055114//oxidation-reduction process	K00102//D-lactate dehydrogenase (cytochrome) [EC:1.1.2.4]	gi|345566167|gb|EGX49113.1|//hypothetical protein AOL_s00079g67 [Arthrobotrys oligospora ATCC 24927];gi|526195999|gb|EPS37434.1|//hypothetical protein H072_8902 [Dactylellina haptotyla CBS 200.50]
AOL_s00215g172	320	19.77	173.76	3.13571	4.9979e-38	2.2118e-37	Up	NA	NA	NA	NA	gi|345560311|gb|EGX43436.1|//hypothetical protein AOL_s00215g172 [Arthrobotrys oligospora ATCC 24927]
AOL_s00112g99	884	1.88	16.52	3.13541	1.07839e-13	2.74232e-13	Up	NA	NA	NA	NA	gi|345562902|gb|EGX45910.1|//hypothetical protein AOL_s00112g99 [Arthrobotrys oligospora ATCC 24927]
AOL_s00004g371	1563	6.03	52.98	3.13522	3.30534e-75	2.39734e-74	Up	NA	GO:0008233//peptidase activity	NA	K01264//aminopeptidase Y [EC:3.4.11.15]	gi|345571524|gb|EGX54338.1|//hypothetical protein AOL_s00004g371 [Arthrobotrys oligospora ATCC 24927]
AOL_s00083g65	1440	1.2	10.53	3.1334	2.62754e-21	8.39516e-21	Up	NA	GO:0016829//lyase activity	NA	K01580//glutamate decarboxylase [EC:4.1.1.15]	gi|345564597|gb|EGX47557.1|//hypothetical protein AOL_s00083g65 [Arthrobotrys oligospora ATCC 24927]
AOL_s00076g49	1254	0.26	2.28	3.13245	0.000109506	0.00018439	Up	NA	NA	NA	NA	gi|345567353|gb|EGX50285.1|//hypothetical protein AOL_s00076g49 [Arthrobotrys oligospora ATCC 24927]
AOL_s00080g190	1329	0.6	5.26	3.13203	1.94527e-07	3.84517e-07	Up	NA	NA	NA	NA	gi|345565612|gb|EGX48561.1|//hypothetical protein AOL_s00080g190 [Arthrobotrys oligospora ATCC 24927]
AOL_s00109g160	666	6.85	59.99	3.13055	1.2327e-33	5.04113e-33	Up	NA	NA	NA	NA	gi|345563401|gb|EGX46402.1|//hypothetical protein AOL_s00109g160 [Arthrobotrys oligospora ATCC 24927]
AOL_s00173g200	3482	0.93	8.14	3.12973	8.75036e-49	4.61275e-48	Up	NA	NA	NA	NA	gi|345562027|gb|EGX45099.1|//hypothetical protein AOL_s00173g200 [Arthrobotrys oligospora ATCC 24927]
AOL_s00006g491	1711	4.81	42.07	3.12868	1.24419e-62	7.79815e-62	Up	NA	NA	NA	NA	gi|345570408|gb|EGX53230.1|//hypothetical protein AOL_s00006g491 [Arthrobotrys oligospora ATCC 24927]
AOL_s00006g353	2520	4.18	36.55	3.1283	1.19843e-74	8.61169e-74	Up	GO:0016021//integral component of membrane	GO:0046872//metal ion binding;GO:0005509//calcium ion binding;GO:0003824//catalytic activity;GO:0050662//coenzyme binding;GO:0016491//oxidoreductase activity	GO:0008152//metabolic process;GO:0055114//oxidation-reduction process	K03885//NADH dehydrogenase [EC:1.6.99.3]	gi|345570666|gb|EGX53487.1|//hypothetical protein AOL_s00006g353 [Arthrobotrys oligospora ATCC 24927];gi|526194210|gb|EPS36126.1|//hypothetical protein H072_10507 [Dactylellina haptotyla CBS 200.50]
AOL_s00110g100	2211	1.19	10.38	3.12477	1.41609e-22	4.65208e-22	Up	NA	NA	NA	K10380//ankyrin	gi|345563273|gb|EGX46276.1|//hypothetical protein AOL_s00110g100 [Arthrobotrys oligospora ATCC 24927]
AOL_s00078g158	936	1.54	13.43	3.12446	5.2481e-12	1.26225e-11	Up	NA	NA	NA	NA	gi|345566727|gb|EGX49669.1|//hypothetical protein AOL_s00078g158 [Arthrobotrys oligospora ATCC 24927]
AOL_s00007g11	752	0.57	4.97	3.12421	0.000303402	0.000495828	Up	NA	NA	NA	NA	gi|345570238|gb|EGX53062.1|//hypothetical protein AOL_s00007g11 [Arthrobotrys oligospora ATCC 24927]
AOL_s00193g116	964	15.98	139.27	3.12355	1.3859e-121	1.49152e-120	Up	NA	NA	NA	NA	gi|345561292|gb|EGX44388.1|//hypothetical protein AOL_s00193g116 [Arthrobotrys oligospora ATCC 24927]
AOL_s00076g182	2717	0.21	1.83	3.12338	3.77296e-06	6.99224e-06	Up	NA	NA	NA	NA	gi|345567486|gb|EGX50418.1|//hypothetical protein AOL_s00076g182 [Arthrobotrys oligospora ATCC 24927]
AOL_s00173g122	2056	1.87	16.28	3.12199	2.64342e-35	1.11782e-34	Up	NA	GO:0016627//oxidoreductase activity, acting on the CH-CH group of donors;GO:0050660//flavin adenine dinucleotide binding;GO:0003995//acyl-CoA dehydrogenase activity;GO:0050662//coenzyme binding	GO:0008152//metabolic process;GO:0055114//oxidation-reduction process	K15389//acyl-CoA dehydrogenase	gi|345561949|gb|EGX45021.1|//hypothetical protein AOL_s00173g122 [Arthrobotrys oligospora ATCC 24927]
AOL_s00081g7	1325	2.41	20.97	3.12122	2.45398e-17	6.98781e-17	Up	NA	NA	NA	K11244//cell wall integrity and stress response component	gi|345565192|gb|EGX48144.1|//hypothetical protein AOL_s00081g7 [Arthrobotrys oligospora ATCC 24927]
AOL_s00081g10	1192	460.02	3995.85	3.11873	0	0	Up	NA	GO:0046914//transition metal ion binding;GO:0008270//zinc ion binding;GO:0003824//catalytic activity;GO:0016491//oxidoreductase activity	GO:0008152//metabolic process;GO:0055114//oxidation-reduction process	K13953//alcohol dehydrogenase, propanol-preferring [EC:1.1.1.1]	gi|345565195|gb|EGX48147.1|//hypothetical protein AOL_s00081g10 [Arthrobotrys oligospora ATCC 24927]
AOL_s00054g566	1263	1.48	12.84	3.11698	3.92082e-24	1.32977e-23	Up	NA	GO:0005488//binding	GO:0008152//metabolic process	NA	gi|345568293|gb|EGX51190.1|//hypothetical protein AOL_s00054g566 [Arthrobotrys oligospora ATCC 24927]
AOL_s00079g356	1937	0.48	4.16	3.11548	2.01554e-08	4.19398e-08	Up	NA	NA	NA	K03686//molecular chaperone DnaJ;K00540;K00218//protochlorophyllide reductase [EC:1.3.1.33]	gi|345565769|gb|EGX48717.1|//hypothetical protein AOL_s00079g356 [Arthrobotrys oligospora ATCC 24927]
AOL_s00173g247	3991	0.9	7.8	3.11548	2.68914e-30	1.02843e-29	Up	NA	NA	NA	NA	gi|345562074|gb|EGX45146.1|//hypothetical protein AOL_s00173g247 [Arthrobotrys oligospora ATCC 24927]
AOL_s00078g433	1796	72.45	626.93	3.11325	0	0	Up	NA	NA	NA	K12670//oligosaccharyltransferase complex subunit beta	gi|345566457|gb|EGX49400.1|//hypothetical protein AOL_s00078g433 [Arthrobotrys oligospora ATCC 24927];gi|345566458|gb|EGX49401.1|//hypothetical protein AOL_s00078g434 [Arthrobotrys oligospora ATCC 24927]
AOL_s00215g280	1943	24.46	211.53	3.11237	0	0	Up	NA	GO:0046872//metal ion binding;GO:0005506//iron ion binding;GO:0016491//oxidoreductase activity	GO:0008152//metabolic process	K00517;K00540//null;K07824//benzoate 4-monooxygenase [EC:1.14.13.12]	gi|345560419|gb|EGX43544.1|//hypothetical protein AOL_s00215g280 [Arthrobotrys oligospora ATCC 24927]
AOL_s00054g153	3902	4.88	42.18	3.11161	1.47691e-66	9.70038e-66	Up	NA	NA	NA	NA	gi|345568561|gb|EGX51454.1|//hypothetical protein AOL_s00054g153 [Arthrobotrys oligospora ATCC 24927]
AOL_s00078g578	2059	0.28	2.42	3.11151	1.0163e-05	1.8328e-05	Up	NA	GO:0016787//hydrolase activity;GO:0030247//polysaccharide binding;GO:0003824//catalytic activity;GO:0005488//binding;GO:0043167//ion binding;GO:0016798//hydrolase activity, acting on glycosyl bonds	GO:0044238//primary metabolic process	K01179//endoglucanase [EC:3.2.1.4]	gi|345566250|gb|EGX49194.1|//hypothetical protein AOL_s00078g578 [Arthrobotrys oligospora ATCC 24927]
AOL_s00076g620	4912	4.76	41.13	3.11116	6.75238e-42	3.17839e-41	Up	NA	NA	NA	K00100;K00540//null;K18097//glycerol 2-dehydrogenase (NADP+) [EC:1.1.1.156]	gi|345567041|gb|EGX49979.1|//hypothetical protein AOL_s00076g620 [Arthrobotrys oligospora ATCC 24927];gi|345567042|gb|EGX49980.1|//hypothetical protein AOL_s00076g621 [Arthrobotrys oligospora ATCC 24927]
AOL_s00188g225	4944	1.09	9.4	3.10833	4.77318e-45	2.38403e-44	Up	NA	NA	NA	NA	gi|345561468|gb|EGX44557.1|//hypothetical protein AOL_s00188g225 [Arthrobotrys oligospora ATCC 24927]
AOL_s00006g128	4489	1.53	13.19	3.10784	3.31016e-54	1.87656e-53	Up	GO:0005576//extracellular region	GO:0016616//oxidoreductase activity, acting on the CH-OH group of donors, NAD or NADP as acceptor;GO:0051287//NAD binding	GO:0055114//oxidation-reduction process	K00049//glyoxylate/hydroxypyruvate reductase [EC:1.1.1.79 1.1.1.81];K00100;K00090//gluconate 2-dehydrogenase [EC:1.1.1.215];K00058//D-3-phosphoglycerate dehydrogenase [EC:1.1.1.95]	gi|345570441|gb|EGX53262.1|//hypothetical protein AOL_s00006g128 [Arthrobotrys oligospora ATCC 24927]
AOL_s00006g508	2867	0.47	4.05	3.10719	1.895e-10	4.30033e-10	Up	NA	NA	NA	NA	gi|345570425|gb|EGX53247.1|//hypothetical protein AOL_s00006g508 [Arthrobotrys oligospora ATCC 24927]
AOL_s00176g106	1703	2.02	17.32	3.10001	4.04564e-34	1.66764e-33	Up	GO:0032991//macromolecular complex;GO:0031981//nuclear lumen	GO:0005488//binding	GO:0022402//cell cycle process;GO:0006261//DNA-dependent DNA replication;GO:0043933//macromolecular complex subunit organization	K06628//cell division control protein 45	gi|345561748|gb|EGX44824.1|//hypothetical protein AOL_s00176g106 [Arthrobotrys oligospora ATCC 24927]
AOL_s00173g215	692	1.2	10.26	3.09592	4.68664e-07	9.098e-07	Up	NA	NA	NA	NA	gi|345562042|gb|EGX45114.1|//hypothetical protein AOL_s00173g215 [Arthrobotrys oligospora ATCC 24927]
AOL_s00004g329	1308	0.46	3.93	3.09482	1.0163e-05	1.83245e-05	Up	NA	NA	NA	NA	gi|345571482|gb|EGX54296.1|//hypothetical protein AOL_s00004g329 [Arthrobotrys oligospora ATCC 24927]
AOL_s00043g483	2527	5.61	47.92	3.09456	1.33076e-100	1.20884e-99	Up	NA	NA	NA	K11204//glutamate--cysteine ligase catalytic subunit [EC:6.3.2.2]	gi|345569225|gb|EGX52093.1|//hypothetical protein AOL_s00043g483 [Arthrobotrys oligospora ATCC 24927]
AOL_s00076g89	2888	47.05	401.73	3.09396	0	0	Up	NA	GO:0070011//peptidase activity, acting on L-amino acid peptides;GO:0008238//exopeptidase activity;GO:0046914//transition metal ion binding	GO:0019538//protein metabolic process	K13721//aminopeptidase 2 [EC:3.4.11.-]	gi|345567393|gb|EGX50325.1|//hypothetical protein AOL_s00076g89 [Arthrobotrys oligospora ATCC 24927]
AOL_s00043g358	2726	0.72	6.14	3.09217	4.15582e-11	9.69033e-11	Up	GO:0016021//integral component of membrane	GO:0015171//amino acid transmembrane transporter activity	GO:0006865//amino acid transport;GO:0003333//amino acid transmembrane transport	K16261//yeast amino acid transporter	gi|345569348|gb|EGX52215.1|//hypothetical protein AOL_s00043g358 [Arthrobotrys oligospora ATCC 24927]
AOL_s00169g260	2279	3.2	27.27	3.09117	2.83036e-57	1.66219e-56	Up	NA	NA	NA	K00766//anthranilate phosphoribosyltransferase [EC:2.4.2.18]	gi|345562586|gb|EGX45654.1|//hypothetical protein AOL_s00169g260 [Arthrobotrys oligospora ATCC 24927]
AOL_s00083g28	4241	10.04	85.54	3.09084	0	0	Up	NA	NA	NA	K01183//chitinase [EC:3.2.1.14]	gi|345564857|gb|EGX47816.1|//hypothetical protein AOL_s00083g28 [Arthrobotrys oligospora ATCC 24927]
AOL_s00083g252	1690	1.18	10.04	3.0889	9.85406e-19	2.91926e-18	Up	NA	GO:0016787//hydrolase activity	NA	NA	gi|345564784|gb|EGX47744.1|//hypothetical protein AOL_s00083g252 [Arthrobotrys oligospora ATCC 24927]
AOL_s00173g57	647	9.08	77.25	3.08877	3.84824e-42	1.82059e-41	Up	NA	NA	NA	NA	gi|345561884|gb|EGX44956.1|//hypothetical protein AOL_s00173g57 [Arthrobotrys oligospora ATCC 24927]
AOL_s00007g400	4523	4.27	36.31	3.08806	8.22308e-135	9.70115e-134	Up	NA	NA	NA	K01210//glucan 1,3-beta-glucosidase [EC:3.2.1.58]	gi|345569791|gb|EGX52617.1|//hypothetical protein AOL_s00007g400 [Arthrobotrys oligospora ATCC 24927]
AOL_s00215g369	1590	5.12	43.52	3.08746	2.44424e-90	2.05413e-89	Up	NA	NA	NA	K01426//amidase [EC:3.5.1.4]	gi|345560508|gb|EGX43633.1|//hypothetical protein AOL_s00215g369 [Arthrobotrys oligospora ATCC 24927]
AOL_s00075g56	3740	1.51	12.82	3.08578	2.94426e-45	1.47609e-44	Up	NA	NA	GO:0044763//single-organism cellular process;GO:0050789//regulation of biological process;GO:0065007//biological regulation	K05760//paxillin	gi|345567702|gb|EGX50630.1|//hypothetical protein AOL_s00075g56 [Arthrobotrys oligospora ATCC 24927]
AOL_s00004g339	563	4.47	37.91	3.08423	1.0797e-17	3.10773e-17	Up	NA	NA	NA	K15634//probable phosphoglycerate mutase [EC:5.4.2.12]	gi|345571492|gb|EGX54306.1|//hypothetical protein AOL_s00004g339 [Arthrobotrys oligospora ATCC 24927]
AOL_s00076g45	3114	3.7	31.33	3.08195	1.51253e-84	1.20588e-83	Up	NA	NA	NA	K09243//transcriptional regulatory protein UME6;K09245//transcriptional activator protein UGA3	gi|345567349|gb|EGX50281.1|//hypothetical protein AOL_s00076g45 [Arthrobotrys oligospora ATCC 24927]
AOL_s00004g151	6416	33.59	283.67	3.07811	0	0	Up	NA	GO:0016791//phosphatase activity	NA	K01092//myo-inositol-1(or 4)-monophosphatase [EC:3.1.3.25]	gi|345571303|gb|EGX54117.1|//hypothetical protein AOL_s00004g150 [Arthrobotrys oligospora ATCC 24927];gi|345571304|gb|EGX54118.1|//hypothetical protein AOL_s00004g151 [Arthrobotrys oligospora ATCC 24927]
AOL_s00078g546	1145	0.34	2.87	3.07744	3.96396e-06	7.32727e-06	Up	NA	NA	NA	K01210//glucan 1,3-beta-glucosidase [EC:3.2.1.58]	gi|345566218|gb|EGX49162.1|//hypothetical protein AOL_s00078g546 [Arthrobotrys oligospora ATCC 24927]
AOL_s00083g203	4103	1.6	13.46	3.07253	1.11138e-15	3.01281e-15	Up	NA	GO:0016779//nucleotidyltransferase activity;GO:0005488//binding	GO:0044260//cellular macromolecule metabolic process;GO:0090304//nucleic acid metabolic process	K02685//DNA primase large subunit [EC:2.7.7.-]	gi|345564735|gb|EGX47695.1|//hypothetical protein AOL_s00083g203 [Arthrobotrys oligospora ATCC 24927]
AOL_s00004g372	2175	3.93	33.02	3.07074	3.60116e-65	2.33075e-64	Up	NA	GO:0003824//catalytic activity	NA	K01210//glucan 1,3-beta-glucosidase [EC:3.2.1.58]	gi|345571525|gb|EGX54339.1|//hypothetical protein AOL_s00004g372 [Arthrobotrys oligospora ATCC 24927]
AOL_s00076g651	1132	1.97	16.54	3.06969	6.00466e-18	1.73962e-17	Up	NA	NA	NA	NA	gi|345566914|gb|EGX49853.1|//hypothetical protein AOL_s00076g651 [Arthrobotrys oligospora ATCC 24927]
AOL_s00054g681	4111	2.49	20.86	3.06652	4.9258e-48	2.57479e-47	Up	NA	NA	NA	K05747//Wiskott-Aldrich syndrome protein	gi|345568044|gb|EGX50945.1|//hypothetical protein AOL_s00054g681 [Arthrobotrys oligospora ATCC 24927]
AOL_s00117g57	600	6.21	52.01	3.06612	1.35657e-86	1.10614e-85	Up	NA	NA	NA	K00306//sarcosine oxidase / L-pipecolate oxidase [EC:1.5.3.1 1.5.3.7]	gi|345562839|gb|EGX45852.1|//hypothetical protein AOL_s00117g57 [Arthrobotrys oligospora ATCC 24927]
AOL_s00054g895	2876	3.34	27.97	3.06596	1.41693e-60	8.68799e-60	Up	NA	NA	NA	NA	gi|345567908|gb|EGX50810.1|//hypothetical protein AOL_s00054g896 [Arthrobotrys oligospora ATCC 24927];gi|345567907|gb|EGX50809.1|//hypothetical protein AOL_s00054g895 [Arthrobotrys oligospora ATCC 24927]
AOL_s00081g219	1504	17.5	146.46	3.06508	3.50076e-167	4.98123e-166	Up	NA	GO:0003824//catalytic activity;GO:0005488//binding;GO:0016491//oxidoreductase activity	GO:0008152//metabolic process;GO:0006520//cellular amino acid metabolic process	K00143//L-aminoadipate-semialdehyde dehydrogenase [EC:1.2.1.31]	gi|345564936|gb|EGX47892.1|//hypothetical protein AOL_s00081g219 [Arthrobotrys oligospora ATCC 24927]
AOL_s00083g363	3170	4.75	39.74	3.06459	9.41664e-115	9.57067e-114	Up	NA	GO:0008422//beta-glucosidase activity;GO:0016798//hydrolase activity, acting on glycosyl bonds	GO:0008152//metabolic process;GO:0044238//primary metabolic process;GO:0030245//cellulose catabolic process	K05349//beta-glucosidase [EC:3.2.1.21]	gi|582958353|gb|EWC46562.1|//hypothetical protein DRE_04285 [Drechslerella stenobrocha 248];gi|345564465|gb|EGX47427.1|//hypothetical protein AOL_s00083g363 [Arthrobotrys oligospora ATCC 24927]
AOL_s00076g347	7421	1.4	11.69	3.06178	6.68814e-17	1.87808e-16	Up	GO:0000779//condensed chromosome, centromeric region	NA	NA	K11501//centromere protein I	gi|345567207|gb|EGX50142.1|//hypothetical protein AOL_s00076g347 [Arthrobotrys oligospora ATCC 24927]
AOL_s00006g303	1526	1.16	9.68	3.06088	2.5554e-08	5.29252e-08	Up	NA	NA	NA	K14526//ribonuclease P/MRP protein subunit POP7 [EC:3.1.26.5]	gi|345570616|gb|EGX53437.1|//hypothetical protein AOL_s00006g303 [Arthrobotrys oligospora ATCC 24927]
AOL_s00215g878	1809	0.32	2.67	3.0607	0.000111851	0.00018827	Up	NA	NA	NA	K08486//syntaxin 1B/2/3	gi|345559797|gb|EGX42929.1|//hypothetical protein AOL_s00215g878 [Arthrobotrys oligospora ATCC 24927]
AOL_s00169g157	1196	0.44	3.67	3.0602	2.88538e-07	5.66858e-07	Up	NA	NA	NA	NA	gi|345562483|gb|EGX45551.1|//hypothetical protein AOL_s00169g157 [Arthrobotrys oligospora ATCC 24927]
AOL_s00006g22	1137	6.98	58.19	3.05947	2.10036e-46	1.07203e-45	Up	GO:0005672//transcription factor TFIIA complex;GO:0005667//transcription factor complex	GO:0008135//translation factor activity, nucleic acid binding	GO:0006355//regulation of transcription, DNA-templated;GO:0006412//translation;GO:0006367//transcription initiation from RNA polymerase II promoter;GO:0006352//DNA-templated transcription, initiation	K03123//transcription initiation factor TFIIA small subunit	gi|345570876|gb|EGX53694.1|//hypothetical protein AOL_s00006g22 [Arthrobotrys oligospora ATCC 24927]
AOL_s00081g228	1362	0.29	2.41	3.05491	0.00055882	0.000898121	Up	NA	NA	NA	NA	gi|345564945|gb|EGX47901.1|//hypothetical protein AOL_s00081g228 [Arthrobotrys oligospora ATCC 24927]
AOL_s00117g34	549	0.82	6.81	3.05396	0.00055882	0.000897656	Up	NA	NA	NA	NA	gi|345562816|gb|EGX45829.1|//hypothetical protein AOL_s00117g34 [Arthrobotrys oligospora ATCC 24927]
AOL_s00110g183	1906	1.32	10.96	3.05364	3.57454e-16	9.82155e-16	Up	NA	NA	NA	NA	gi|345563015|gb|EGX46019.1|//hypothetical protein AOL_s00110g183 [Arthrobotrys oligospora ATCC 24927]
AOL_s00004g200	1320	0.3	2.49	3.05311	0.00055882	0.000897966	Up	NA	NA	NA	NA	gi|345571353|gb|EGX54167.1|//hypothetical protein AOL_s00004g200 [Arthrobotrys oligospora ATCC 24927]
AOL_s00043g59	474	16.5	136.93	3.0529	1.06843e-48	5.62585e-48	Up	NA	NA	NA	NA	gi|345569404|gb|EGX52270.1|//hypothetical protein AOL_s00043g59 [Arthrobotrys oligospora ATCC 24927]
AOL_s00007g459	1186	1.35	11.18	3.04989	1.41609e-22	4.65044e-22	Up	NA	NA	NA	K11493//regulator of chromosome condensation	gi|345569850|gb|EGX52676.1|//hypothetical protein AOL_s00007g459 [Arthrobotrys oligospora ATCC 24927]
AOL_s00078g609	3067	2.27	18.78	3.04843	2.91778e-19	8.76086e-19	Up	NA	NA	NA	NA	gi|345566281|gb|EGX49225.1|//hypothetical protein AOL_s00078g609 [Arthrobotrys oligospora ATCC 24927]
AOL_s00006g46	1221	0.82	6.78	3.04759	2.34154e-08	4.85606e-08	Up	NA	NA	NA	NA	gi|345570900|gb|EGX53718.1|//hypothetical protein AOL_s00006g46 [Arthrobotrys oligospora ATCC 24927]
AOL_s00007g83	2032	9.24	76.3	3.04572	4.59926e-128	5.19577e-127	Up	NA	GO:0004629//phospholipase C activity	GO:0044699//single-organism process;GO:0007165//signal transduction	K05857//phosphatidylinositol phospholipase C, delta [EC:3.1.4.11]	gi|345570310|gb|EGX53134.1|//hypothetical protein AOL_s00007g83 [Arthrobotrys oligospora ATCC 24927]
AOL_s00210g365	300	11.57	95.43	3.04405	4.7244e-22	1.53527e-21	Up	NA	GO:0016740//transferase activity;GO:0005488//binding	NA	K00861//riboflavin kinase [EC:2.7.1.26]	gi|345560799|gb|EGX43918.1|//hypothetical protein AOL_s00210g365 [Arthrobotrys oligospora ATCC 24927]
AOL_s00076g409	1662	0.34	2.8	3.04182	3.11376e-08	6.42894e-08	Up	NA	NA	NA	K02365//separase [EC:3.4.22.49]	gi|345567122|gb|EGX50058.1|//hypothetical protein AOL_s00076g409 [Arthrobotrys oligospora ATCC 24927]
AOL_s00078g193	761	8.35	68.68	3.04004	4.85614e-31	1.88423e-30	Up	NA	GO:0005543//phospholipid binding	GO:0009987//cellular process	NA	gi|345566762|gb|EGX49704.1|//hypothetical protein AOL_s00078g193 [Arthrobotrys oligospora ATCC 24927]
AOL_s00176g108	906	5.26	43.23	3.0389	1.34016e-33	5.4782e-33	Up	NA	NA	NA	K14300//nuclear pore complex protein Nup133	gi|345561750|gb|EGX44826.1|//hypothetical protein AOL_s00176g108 [Arthrobotrys oligospora ATCC 24927]
AOL_s00004g302	509	48.79	400.66	3.03772	2.46098e-149	3.18118e-148	Up	GO:0044424//intracellular part	GO:0046872//metal ion binding;GO:0016866//intramolecular transferase activity;GO:0016868//intramolecular transferase activity, phosphotransferases	GO:0044238//primary metabolic process;GO:0019318//hexose metabolic process	K01835//phosphoglucomutase [EC:5.4.2.2]	gi|345571455|gb|EGX54269.1|//hypothetical protein AOL_s00004g302 [Arthrobotrys oligospora ATCC 24927]
AOL_s00078g235	3241	5.96	48.94	3.03763	2.00262e-113	2.00047e-112	Up	NA	NA	NA	NA	gi|345566804|gb|EGX49746.1|//hypothetical protein AOL_s00078g235 [Arthrobotrys oligospora ATCC 24927]
AOL_s00097g532	308	28.76	236.11	3.03732	8.92772e-47	4.58437e-46	Up	NA	NA	NA	K10437//phenylacetate 2-hydroxylase [EC:1.14.13.-]	gi|345563642|gb|EGX46628.1|//hypothetical protein AOL_s00097g532 [Arthrobotrys oligospora ATCC 24927]
BGI_novel_G000020	2086	1.2	9.85	3.03709	1.7282e-19	5.21932e-19	Up	NA	NA	NA	NA	gi|345566527|gb|EGX49470.1|//hypothetical protein AOL_s00078g503 [Arthrobotrys oligospora ATCC 24927]
AOL_s00079g464	829	0.51	4.18	3.03493	0.00055882	0.000898276	Up	NA	NA	NA	NA	gi|345565877|gb|EGX48825.1|//hypothetical protein AOL_s00079g464 [Arthrobotrys oligospora ATCC 24927]
AOL_s00043g248	1373	1.15	9.41	3.03256	1.46951e-14	3.84391e-14	Up	NA	NA	NA	K01183//chitinase [EC:3.2.1.14]	gi|345569593|gb|EGX52459.1|//hypothetical protein AOL_s00043g248 [Arthrobotrys oligospora ATCC 24927]
AOL_s00173g87	1981	1.69	13.82	3.03166	4.08742e-29	1.53732e-28	Up	NA	NA	NA	NA	gi|345561914|gb|EGX44986.1|//hypothetical protein AOL_s00173g87 [Arthrobotrys oligospora ATCC 24927]
AOL_s00109g31	1104	4.03	32.78	3.02396	1.12407e-31	4.42039e-31	Up	NA	NA	NA	K10599//pre-mRNA-processing factor 19 [EC:2.3.2.27]	gi|345563459|gb|EGX46459.1|//hypothetical protein AOL_s00109g31 [Arthrobotrys oligospora ATCC 24927]
AOL_s00097g234	4011	3.84	31.22	3.02329	2.78596e-97	2.47287e-96	Up	NA	NA	NA	NA	gi|345564013|gb|EGX46995.1|//hypothetical protein AOL_s00097g234 [Arthrobotrys oligospora ATCC 24927]
AOL_s00080g87	1459	37.05	300.77	3.02112	0	0	Up	NA	GO:0003824//catalytic activity;GO:0005488//binding	GO:0008152//metabolic process	K07119//uncharacterized protein	gi|345565509|gb|EGX48458.1|//hypothetical protein AOL_s00080g87 [Arthrobotrys oligospora ATCC 24927]
AOL_s00054g935	1563	0.63	5.11	3.0199	1.05885e-07	2.12821e-07	Up	NA	NA	NA	K01669//deoxyribodipyrimidine photo-lyase [EC:4.1.99.3]	gi|345567947|gb|EGX50849.1|//hypothetical protein AOL_s00054g935 [Arthrobotrys oligospora ATCC 24927]
AOL_s00080g94	3181	2.87	23.27	3.01935	3.40914e-86	2.77011e-85	Up	GO:0043234//protein complex	GO:0032559//adenyl ribonucleotide binding	GO:0006281//DNA repair;GO:0022402//cell cycle process;GO:0006259//DNA metabolic process	K10866//DNA repair protein RAD50 [EC:3.6.-.-]	gi|582955365|gb|EWC43614.1|//hypothetical protein DRE_01501 [Drechslerella stenobrocha 248];gi|526202096|gb|EPS42520.1|//hypothetical protein H072_3515 [Dactylellina haptotyla CBS 200.50];gi|345565516|gb|EGX48465.1|//hypothetical protein AOL_s00080g94 [Arthrobotrys oligospora ATCC 24927]
AOL_s00215g818	2125	210.01	1699.99	3.017	0	0	Up	GO:0044424//intracellular part;GO:0005634//nucleus;GO:0005794//Golgi apparatus;GO:0005829//cytosol	GO:0016620//oxidoreductase activity, acting on the aldehyde or oxo group of donors, NAD or NADP as acceptor;GO:0003824//catalytic activity;GO:0004030//aldehyde dehydrogenase [NAD(P)+] activity	GO:0008152//metabolic process;GO:0055114//oxidation-reduction process	K00128//aldehyde dehydrogenase (NAD+) [EC:1.2.1.3]	gi|345559901|gb|EGX43032.1|//hypothetical protein AOL_s00215g818 [Arthrobotrys oligospora ATCC 24927]
AOL_s00110g308	2375	5.29	42.78	3.0156	6.0347e-91	5.12235e-90	Up	NA	GO:0016741//transferase activity, transferring one-carbon groups	GO:0006730//one-carbon metabolic process	K14404//cleavage and polyadenylation specificity factor subunit 4;K06897//7,8-dihydropterin-6-yl-methyl-4-(beta-D-ribofuranosyl)aminobenzene 5'-phosphate synthase [EC:2.5.1.105];K12584//m7GpppX diphosphatase [EC:3.6.1.59]	gi|345563140|gb|EGX46144.1|//hypothetical protein AOL_s00110g308 [Arthrobotrys oligospora ATCC 24927]
AOL_s00043g448	3527	17.19	138.91	3.01451	0	0	Up	NA	NA	NA	K10643//CCR4-NOT transcription complex subunit 4 [EC:2.3.2.27]	gi|345569190|gb|EGX52058.1|//hypothetical protein AOL_s00043g448 [Arthrobotrys oligospora ATCC 24927]
AOL_s00097g562	1020	10.41	83.97	3.0119	5.00282e-72	3.51102e-71	Up	NA	GO:0016765//transferase activity, transferring alkyl or aryl (other than methyl) groups	GO:0008652//cellular amino acid biosynthetic process	K01626//3-deoxy-7-phosphoheptulonate synthase [EC:2.5.1.54]	gi|345563672|gb|EGX46658.1|//hypothetical protein AOL_s00097g562 [Arthrobotrys oligospora ATCC 24927]
AOL_s00079g13	4346	43.66	352.01	3.01123	0	0	Up	NA	GO:0005092//GDP-dissociation inhibitor activity	GO:0033124//regulation of GTP catabolic process;GO:0006810//transport	K17255//Rab GDP dissociation inhibitor	gi|345566196|gb|EGX49141.1|//hypothetical protein AOL_s00079g13 [Arthrobotrys oligospora ATCC 24927]
AOL_s00176g69	946	0.59	4.75	3.00914	6.1796e-05	0.00010591	Up	NA	NA	NA	K15503//serine/threonine-protein phosphatase 6 regulatory ankyrin repeat subunit B;K06653//CDK inhibitor PHO81;K16261//yeast amino acid transporter;K02155//V-type H+-transporting ATPase 16kDa proteolipid subunit;K15110//solute carrier family 25 (mitochondrial 2-oxodicarboxylate transporter), member 21;K01279//tripeptidyl-peptidase I [EC:3.4.14.9];K03094//S-phase kinase-associated protein 1;K00777	gi|345561823|gb|EGX44898.1|//hypothetical protein AOL_s00176g69 [Arthrobotrys oligospora ATCC 24927]
AOL_s00043g772	3432	2.94	23.66	3.00856	6.71864e-72	4.70103e-71	Up	NA	NA	NA	K01127//glycosylphosphatidylinositol phospholipase D [EC:3.1.4.50]	gi|345568883|gb|EGX51753.1|//hypothetical protein AOL_s00043g772 [Arthrobotrys oligospora ATCC 24927]
AOL_s00169g4	1020	143.28	1153.03	3.00852	0	0	Up	GO:0043231//intracellular membrane-bounded organelle;GO:0000785//chromatin;GO:0000790//nuclear chromatin;GO:0000786//nucleosome	GO:0003677//DNA binding;GO:0046982//protein heterodimerization activity;GO:0003676//nucleic acid binding	GO:0034728//nucleosome organization;GO:0033554//cellular response to stress;GO:0006342//chromatin silencing;GO:0006281//DNA repair;GO:0006259//DNA metabolic process	K11251//histone H2A	gi|682362469|gb|KFY49880.1|//hypothetical protein V496_09762 [Pseudogymnoascus pannorum VKM F-4515 (FW-2607)];gi|345562603|gb|EGX45670.1|//hypothetical protein AOL_s00169g4 [Arthrobotrys oligospora ATCC 24927]
AOL_s00006g31	1797	1.62	13.02	3.00666	8.44834e-21	2.66098e-20	Up	NA	NA	NA	K19347//SUN domain-containing protein 1/2	gi|345570885|gb|EGX53703.1|//hypothetical protein AOL_s00006g31 [Arthrobotrys oligospora ATCC 24927]
AOL_s00078g280	2838	0.82	6.59	3.00658	1.84826e-18	5.42204e-18	Up	NA	NA	NA	K11229//mitogen-activated protein kinase kinase kinase [EC:2.7.11.1]	gi|345566304|gb|EGX49247.1|//hypothetical protein AOL_s00078g280 [Arthrobotrys oligospora ATCC 24927]
AOL_s00173g299	1237	2.19	17.6	3.00657	9.23926e-34	3.78339e-33	Up	NA	GO:0016787//hydrolase activity	NA	K01240//uridine nucleosidase [EC:3.2.2.3]	gi|345562126|gb|EGX45198.1|//hypothetical protein AOL_s00173g299 [Arthrobotrys oligospora ATCC 24927]
[truncated: 2,835 more rows]

## Sheet: Table S8
Table S8 DEGs list in comparison group AO-Re/AO-Ck
[truncated: 3,819 more rows]

[truncated: 1 more sheets: Table S9]
